# Supplementary material for: Multi-Omic Data Interpretation to Repurpose Subtype Specific Drug Candidates for Breast Cancer
Source: Front Genet. 2019 May 7;10:420. doi: 10.3389/fgene.2019.00420 (PMC6514249; doi:10.3389/fgene.2019.00420)
Supplement: TABLE S1 — Non-basal and basal-like subtype specific PPI elucidation via differential interactome. [file Table_1.XLSX]

## Sheet: Table S1
Basal Subtype>>	Protein A	Protein B	H	Q			Non-Basal Subtype>>	Protein A	Protein B	H	Q
	ARMC8	MKLN1	0.0273366	0.00274791				MEX3B	NUDT3	0.0632246	0.99257
	MKLN1	MYC	0.0273366	0.00274791				MEX3B	SMAD4	0.0632246	0.99257
	MKLN1	RNPS1	0.0273366	0.00274791				BMI1	KLHL8	0.0663	0.992132
	IL21R	JAK1	0.0502892	0.0056459				COIL	KLHL8	0.0663	0.992132
	IL21R	WSB2	0.0515939	0.00582131				KLHL8	UBC	0.0663	0.992132
	NUP37	NUP43	0.063292	0.00743915				FRMD8	NRF1	0.119859	0.983745
	NUP37	NUP85	0.063292	0.00743915				HDAC1	MX2	0.141235	0.980037
	NUP37	SEC13	0.063292	0.00743915				HDAC2	MX2	0.141235	0.980037
	NUP37	SNW1	0.063292	0.00743915				MX2	TBPL1	0.141235	0.980037
	NUP37	UBC	0.0654543	0.00774672				MX2	UBC	0.141235	0.980037
	GNAI2	RGS14	0.0867137	0.0109018				MX2	TBP	0.141867	0.979924
	CTCF	EED	0.0910639	0.0115752				MX2	PIAS2	0.143367	0.979656
	DDB1	EED	0.0910639	0.0115752				DPP9	SURF2	0.217946	0.965195
	DDX18	EED	0.0910639	0.0115752				RAP1A	RGS14	0.233184	0.96197
	DHX9	EED	0.0910639	0.0115752				RAP1A	RHEB	0.233184	0.96197
	EED	PSPC1	0.0910639	0.0115752				BIN1	RAP1A	0.233184	0.96197
	EED	RAD50	0.0910639	0.0115752				BRAF	RAP1A	0.233184	0.96197
	EED	RING1	0.0910639	0.0115752				CDC42	RAP1A	0.233184	0.96197
	AEBP2	EED	0.0910639	0.0115752				ESR1	RAP1A	0.233184	0.96197
	ASXL1	EED	0.0910639	0.0115752				FADD	RAP1A	0.233184	0.96197
	BAZ1B	EED	0.0910639	0.0115752				FEN1	RAP1A	0.233184	0.96197
	BAZ2A	EED	0.0910639	0.0115752				GANAB	RAP1A	0.233184	0.96197
	BCOR	EED	0.0910639	0.0115752				HDAC1	RAP1A	0.233184	0.96197
	BMI1	EED	0.0910639	0.0115752				MTOR	RAP1A	0.233184	0.96197
	BPTF	EED	0.0910639	0.0115752				PDE6D	RAP1A	0.233184	0.96197
	CBX3	EED	0.0910639	0.0115752				RAB1A	RAP1A	0.233184	0.96197
	CBX4	EED	0.0910639	0.0115752				RALA	RAP1A	0.233184	0.96197
	CDC5L	EED	0.0910639	0.0115752				RAP1A	RASA1	0.233184	0.96197
	CHD4	EED	0.0910639	0.0115752				RAP1A	TRAF6	0.233184	0.96197
	DDX42	EED	0.0910639	0.0115752				RAP1A	TSC2	0.233184	0.96197
	DHX15	EED	0.0910639	0.0115752				RAP1A	UBC	0.233184	0.96197
	DNMT1	EED	0.0910639	0.0115752				RAF1	RAP1A	0.234454	0.961697
	E2F6	EED	0.0910639	0.0115752				RAP1A	RASA3	0.234454	0.961697
	EED	EHMT1	0.0910639	0.0115752				KRIT1	RAP1A	0.239694	0.960565
	EED	EPC1	0.0910639	0.0115752				ABCD3	CUL3	0.266894	0.954516
	EED	EZH1	0.0910639	0.0115752				ABCD3	PELO	0.272112	0.953323
	EED	EZH2	0.0910639	0.0115752				ABCD3	PEX19	0.272112	0.953323
	EED	HDAC1	0.0910639	0.0115752				RADIL	RAP1A	0.275717	0.952492
	EED	HDAC2	0.0910639	0.0115752				G2E3	WDR6	0.276329	0.95235
	EED	HDAC3	0.0910639	0.0115752				E2F3	TFE3	0.27943	0.95163
	EED	HIC1	0.0910639	0.0115752				CUL2	TFE3	0.27943	0.95163
	EED	HMGB2	0.0910639	0.0115752				EIF3A	TFE3	0.27943	0.95163
	EED	KDM1A	0.0910639	0.0115752				NEDD8	TFE3	0.27943	0.95163
	EED	KDM2A	0.0910639	0.0115752				PHB2	TFE3	0.27943	0.95163
	EED	LBR	0.0910639	0.0115752				SET	TFE3	0.27943	0.95163
	EED	MEN1	0.0910639	0.0115752				SMAD3	TFE3	0.27943	0.95163
	EED	MTA1	0.0910639	0.0115752				SMAD4	TFE3	0.27943	0.95163
	EED	MYEF2	0.0910639	0.0115752				TFE3	TFEB	0.27943	0.95163
	EED	MYH10	0.0910639	0.0115752				ABCD1	ABCD3	0.281329	0.951188
	EED	MYH9	0.0910639	0.0115752				ACLY	TFE3	0.281329	0.951188
	EED	NAT10	0.0910639	0.0115752				MITF	TFE3	0.2872	0.949811
	EED	NCBP1	0.0910639	0.0115752				SSR2	SSR3	0.288205	0.949574
	EED	NDRG1	0.0910639	0.0115752				FLNB	UBTD2	0.297613	0.947335
	EED	NOL11	0.0910639	0.0115752				TFE3	TFEC	0.299798	0.94681
	EED	NONO	0.0910639	0.0115752				DDIT3	JUNB	0.306569	0.94517
	EED	NOP56	0.0910639	0.0115752				ATF4	JUNB	0.306569	0.94517
	EED	NUMA1	0.0910639	0.0115752				BATF2	JUNB	0.306569	0.94517
	EED	NUP85	0.0910639	0.0115752				BATF3	JUNB	0.306569	0.94517
	EED	PCBP1	0.0910639	0.0115752				BCL6	JUNB	0.306569	0.94517
	EED	PHB2	0.0910639	0.0115752				BCR	TCF7	0.306569	0.94517
	EED	PHC2	0.0910639	0.0115752				BRCA1	JUNB	0.306569	0.94517
	EED	PHF19	0.0910639	0.0115752				EP300	JUNB	0.306569	0.94517
	EED	PUF60	0.0910639	0.0115752				ESR1	JUNB	0.306569	0.94517
	EED	RAB7A	0.0910639	0.0115752				FOS	JUNB	0.306569	0.94517
	EED	RAC1	0.0910639	0.0115752				FOSB	JUNB	0.306569	0.94517
	EED	RAD21	0.0910639	0.0115752				FOSL2	JUNB	0.306569	0.94517
	EED	RALY	0.0910639	0.0115752				JDP2	JUNB	0.306569	0.94517
	EED	RAN	0.0910639	0.0115752				JUNB	NINL	0.306569	0.94517
	EED	RBBP4	0.0910639	0.0115752				JUNB	SAT1	0.306569	0.94517
	EED	RBM28	0.0910639	0.0115752				JUNB	SET	0.306569	0.94517
	EED	RBM4	0.0910639	0.0115752				JUNB	SMAD3	0.306569	0.94517
	EED	RRP12	0.0910639	0.0115752				JUNB	SMAD4	0.306569	0.94517
	EED	SF3B1	0.0910639	0.0115752				JUNB	SUMO2	0.306569	0.94517
	EED	SF3B3	0.0910639	0.0115752				JUNB	TDG	0.306569	0.94517
	EED	SFPQ	0.0910639	0.0115752				JUNB	UBC	0.306569	0.94517
	EED	SIN3A	0.0910639	0.0115752				RUNX3	TCF7	0.306569	0.94517
	EED	SMC1A	0.0910639	0.0115752				BATF	JUNB	0.308903	0.944601
	EED	SMC3	0.0910639	0.0115752				ATF3	JUNB	0.311276	0.94402
	EED	SSRP1	0.0910639	0.0115752				RNF10	UBE2H	0.323775	0.940922
	EED	STAG1	0.0910639	0.0115752				BRCA1	WDR6	0.336021	0.937824
	EED	SUZ12	0.0910639	0.0115752				GRB2	WDR6	0.336021	0.937824
	EED	TFAM	0.0910639	0.0115752				ILK	WDR6	0.336021	0.937824
	EED	TGS1	0.0910639	0.0115752				STK11	WDR6	0.336021	0.937824
	EED	THOC2	0.0910639	0.0115752				TIA1	WDR6	0.336021	0.937824
	EED	TLE1	0.0910639	0.0115752				UBC	WDR6	0.336021	0.937824
	EED	TRRAP	0.0910639	0.0115752				UVRAG	WDR6	0.336021	0.937824
	EED	UBE2W	0.0910639	0.0115752				ASF1A	UBN1	0.338403	0.937215
	EED	XRCC5	0.0910639	0.0115752				AXIN1	DVL3	0.349344	0.934385
	EED	XRCC6	0.0910639	0.0115752				TAF4	TAF6	0.35565	0.932731
	HMMR	TPX2	0.0959181	0.0123374				RING1	SNAI1	0.360549	0.931434
	ADNP	EED	0.0959181	0.0123374				EGR1	SNAI1	0.360549	0.931434
	ANXA5	EED	0.0959181	0.0123374				FBXL5	SNAI1	0.360549	0.931434
	EED	TRA2B	0.0959181	0.0123374				GSK3B	SNAI1	0.360549	0.931434
	EED	UBC	0.0959181	0.0123374				HDAC2	SNAI1	0.360549	0.931434
	ASCC1	ASCC3	0.101373	0.013207				KDM1A	SNAI1	0.360549	0.931434
	ASCC3	EIF3F	0.101373	0.013207				MDM2	SNAI1	0.360549	0.931434
	ASCC3	EIF3H	0.101373	0.013207				RCOR1	SNAI1	0.360549	0.931434
	ASCC3	G3BP1	0.101373	0.013207				SNAI1	UBC	0.360549	0.931434
	ASCC3	G3BP2	0.101373	0.013207				EZH2	SNAI1	0.362215	0.930991
	ASCC3	HECW2	0.101373	0.013207				NCK1	TGDS	0.362215	0.930991
	ASCC3	JUN	0.101373	0.013207				ABHD4	UBC	0.372584	0.928206
	ASCC3	SKIL	0.101373	0.013207				AKT2	PDPK1	0.381742	0.925707
	ASCC3	SUMO1	0.101373	0.013207				CD44	TIAM1	0.383635	0.925187
	ASCC3	SUMO2	0.101373	0.013207				EPHA2	TIAM1	0.383635	0.925187
	EED	NOP58	0.107551	0.0142085				MYC	TIAM1	0.383635	0.925187
	EIF1B	EIF3M	0.107551	0.0142085				PARD3	TIAM1	0.383635	0.925187
	ASCC3	UBC	0.107551	0.0142085				SDC4	TIAM1	0.383635	0.925187
	ATF2	EED	0.107551	0.0142085				SRC	TIAM1	0.383635	0.925187
	EED	GRN	0.107551	0.0142085				TIAM1	UBC	0.383635	0.925187
	NAT9	SMAD1	0.11096	0.0147684				ANK3	TIAM1	0.387482	0.924123
	ATM	EXO1	0.114614	0.0153743				MBD3	TAF6	0.387482	0.924123
	BLM	EXO1	0.114614	0.0153743				RAC1	TIAM1	0.387482	0.924123
	EXO1	MLH1	0.114614	0.0153743				SDC1	TIAM1	0.387482	0.924123
	EXO1	MSH3	0.114614	0.0153743				SBNO1	UBC	0.390095	0.923397
	EXO1	PCNA	0.114614	0.0153743				COX15	SURF1	0.39544	0.921902
	EXO1	MSH2	0.117199	0.0158067				TAP1	TAP2	0.42166	0.914385
	PSPC1	WBP4	0.122773	0.0167486				CREB1	GLI2	0.428832	0.912274
	ASCC3	SRF	0.122773	0.0167486				GLI2	HDAC1	0.428832	0.912274
	EXO1	PMS1	0.122773	0.0167486				GLI2	SKI	0.428832	0.912274
	IDH3B	RBX1	0.122773	0.0167486				GLI2	SUFU	0.428832	0.912274
	ITSN2	LARP6	0.122773	0.0167486				EMD	LMNA	0.43628	0.910057
	BASP1	PAN2	0.132318	0.0183926				BAZ1B	LMNA	0.43628	0.910057
	MPDZ	SSR3	0.132318	0.0183926				CASP6	LMNA	0.43628	0.910057
	BASP1	RIPK3	0.132318	0.0183926				CDK1	LMNA	0.43628	0.910057
	EXO1	PMS2	0.132318	0.0183926				CHD8	LMNA	0.43628	0.910057
	LMNB2	PAN2	0.132318	0.0183926				CRK	LMNA	0.43628	0.910057
	EIF1B	EIF3I	0.14365	0.0203946				CRKL	LMNA	0.43628	0.910057
	THOC3	TTC1	0.14365	0.0203946				DBNL	LMNA	0.43628	0.910057
	ECSCR	PTEN	0.14365	0.0203946				DDX3X	LMNA	0.43628	0.910057
	EED	PDS5A	0.14365	0.0203946				DDX42	LMNA	0.43628	0.910057
	EGFR	RIN2	0.147918	0.0211624				FYCO1	LMNA	0.43628	0.910057
	ERBB2	RIN2	0.147918	0.0211624				ING1	LMNA	0.43628	0.910057
	RAB5A	RIN2	0.147918	0.0211624				KAT5	LMNA	0.43628	0.910057
	RAB5B	RIN2	0.147918	0.0211624				LMNA	LRRK2	0.43628	0.910057
	RIN2	UBC	0.147918	0.0211624				LMNA	MDM2	0.43628	0.910057
	ABL1	RAD9A	0.150158	0.0215684				LMNA	NARF	0.43628	0.910057
	ATM	RAD9A	0.150158	0.0215684				LMNA	NUMA1	0.43628	0.910057
	ATR	RAD9A	0.150158	0.0215684				LMNA	NUP50	0.43628	0.910057
	BCL2	RAD9A	0.150158	0.0215684				LMNA	NUP98	0.43628	0.910057
	GNAI1	RASD1	0.150158	0.0215684				LMNA	OPA1	0.43628	0.910057
	HDAC1	RAD9A	0.150158	0.0215684				LMNA	PARP1	0.43628	0.910057
	HUS1	RAD9A	0.150158	0.0215684				LMNA	PCBP1	0.43628	0.910057
	MSH2	RAD9A	0.150158	0.0215684				LMNA	PCGF2	0.43628	0.910057
	MSH6	RAD9A	0.150158	0.0215684				LMNA	RBBP4	0.43628	0.910057
	PCNA	RAD9A	0.150158	0.0215684				LMNA	ROCK2	0.43628	0.910057
	PLS1	RASD1	0.150158	0.0215684				LMNA	SMAD3	0.43628	0.910057
	RAD1	RAD9A	0.150158	0.0215684				LMNA	SMG1	0.43628	0.910057
	RAD17	RAD9A	0.150158	0.0215684				LMNA	SRPRB	0.43628	0.910057
	CLSPN	RAD9A	0.157349	0.0228856				LMNA	SRRM1	0.43628	0.910057
	EED	KDM5A	0.157349	0.0228856				LMNA	TOP2A	0.43628	0.910057
	EED	RING1	0.157349	0.0228856				LMNA	TOR1A	0.43628	0.910057
	RING1	SNAI1	0.157349	0.0228856				LMNA	TPR	0.43628	0.910057
	BCOR	RING1	0.157349	0.0228856				LMNA	UBC	0.43628	0.910057
	BMI1	RING1	0.157349	0.0228856				LMNA	URB2	0.43628	0.910057
	CBX3	RING1	0.157349	0.0228856				LMNA	VCAM1	0.43628	0.910057
	CBX4	RING1	0.157349	0.0228856				LMNA	XRCC6	0.43628	0.910057
	CBX7	RING1	0.157349	0.0228856				MED26	TAF6	0.441407	0.908515
	CBX8	RING1	0.157349	0.0228856				FLNA	LMNA	0.441407	0.908515
	E2F1	RING1	0.157349	0.0228856				LATS2	SNAI1	0.441407	0.908515
	E2F6	RING1	0.157349	0.0228856				LMNA	PMS2	0.441407	0.908515
	FHL1	RING1	0.157349	0.0228856				TAF5	TAF6	0.44667	0.906919
	HECW2	RING1	0.157349	0.0228856				AAAS	REL	0.44667	0.906919
	KDM5C	RING1	0.157349	0.0228856				BCL3	REL	0.44667	0.906919
	MSH3	RAD9A	0.157349	0.0228856				C1QBP	REL	0.44667	0.906919
	PCGF1	RING1	0.157349	0.0228856				CLIC4	REL	0.44667	0.906919
	PCGF2	RING1	0.157349	0.0228856				ELF1	REL	0.44667	0.906919
	PCGF3	RING1	0.157349	0.0228856				FHL2	REL	0.44667	0.906919
	PCGF5	RING1	0.157349	0.0228856				GRB2	REL	0.44667	0.906919
	PCGF6	RING1	0.157349	0.0228856				HDAC1	REL	0.44667	0.906919
	PHC1	RING1	0.157349	0.0228856				LASP1	REL	0.44667	0.906919
	PHC2	RING1	0.157349	0.0228856				NCK2	REL	0.44667	0.906919
	RING1	RYBP	0.157349	0.0228856				NFKB1	REL	0.44667	0.906919
	RING1	SNW1	0.157349	0.0228856				NFKB2	REL	0.44667	0.906919
	RING1	TBP	0.157349	0.0228856				NKRF	REL	0.44667	0.906919
	RING1	TERF1	0.157349	0.0228856				PTK6	REL	0.44667	0.906919
	RING1	TERF2	0.157349	0.0228856				REL	SIN3A	0.44667	0.906919
	RING1	TOP2A	0.157349	0.0228856				REL	SOCS3	0.44667	0.906919
	RING1	UBE2K	0.157349	0.0228856				REL	SP1	0.44667	0.906919
	RING1	YAF2	0.157349	0.0228856				REL	TNIP2	0.44667	0.906919
	SAT1	TCF25	0.157349	0.0228856				REL	UBE2K	0.44667	0.906919
	TCF25	UBC	0.157349	0.0228856				REL	UBE2Z	0.44667	0.906919
	TCF25	XIAP	0.157349	0.0228856				REL	VPS25	0.44667	0.906919
	SSR2	SSR3	0.167678	0.0248143				REL	TBK1	0.457623	0.903555
	EED	PSPC1	0.169682	0.0251934				CALR	TAP1	0.457623	0.903555
	NONO	PSPC1	0.169682	0.0251934				CREB3	TAP1	0.457623	0.903555
	NR2C1	PSPC1	0.169682	0.0251934				ESR1	TAP1	0.457623	0.903555
	PSPC1	SFPQ	0.169682	0.0251934				MDFI	TAP1	0.457623	0.903555
	PSPC1	SMAD2	0.169682	0.0251934				MUL1	TAP1	0.457623	0.903555
	PSPC1	SMAD3	0.169682	0.0251934				PDIA3	TAP1	0.457623	0.903555
	PSPC1	UBC	0.169682	0.0251934				REL	TBP	0.457623	0.903555
	AURKA	HMMR	0.174281	0.0260697				SFXN1	TAP1	0.457623	0.903555
	AMPH	AP2A2	0.174281	0.0260697				TAP1	THOC4	0.457623	0.903555
	AP1S1	AP2A2	0.174281	0.0260697				TAP1	THOC5	0.457623	0.903555
	AP2A2	AP2B1	0.174281	0.0260697				TAP1	UBC	0.457623	0.903555
	AP2A2	AP2M1	0.174281	0.0260697				LMNA	SYNE1	0.463326	0.90178
	AP2A2	ARRB2	0.174281	0.0260697				TAP1	TAP2	0.464292	0.901478
	AP2A2	ATM	0.174281	0.0260697				CD2AP	LMNA	0.469189	0.899939
	AP2A2	ATR	0.174281	0.0260697				DTX3L	UBE2H	0.469189	0.899939
	AP2A2	BIN1	0.174281	0.0260697				EP300	REL	0.469189	0.899939
	AP2A2	DAB2	0.174281	0.0260697				ESR1	WDR36	0.481422	0.896041
	AP2A2	EGFR	0.174281	0.0260697				G3BP1	WDR36	0.481422	0.896041
	AP2A2	EPN1	0.174281	0.0260697				HDGF	WDR36	0.481422	0.896041
	AP2A2	EPS15	0.174281	0.0260697				HECW2	WDR36	0.481422	0.896041
	AP2A2	GRB2	0.174281	0.0260697				MMS19	WDR36	0.481422	0.896041
	AP2A2	GRK5	0.174281	0.0260697				PWP2	WDR36	0.481422	0.896041
	AP2A2	SHC1	0.174281	0.0260697				UBC	WDR36	0.481422	0.896041
	AP2A2	SMAD1	0.174281	0.0260697				CBX5	ZNF8	0.487807	0.893975
	AP2A2	TERF2	0.174281	0.0260697				SMAD1	ZNF8	0.487807	0.893975
	AP2A2	UBC	0.174281	0.0260697				SMAD2	ZNF8	0.487807	0.893975
	BACH1	HMMR	0.174281	0.0260697				SMAD3	ZNF8	0.487807	0.893975
	BRCA1	HMMR	0.174281	0.0260697				SMAD4	ZNF8	0.487807	0.893975
	CD44	HMMR	0.174281	0.0260697				SMAD5	ZNF8	0.487807	0.893975
	CDYL2	HINFP	0.174281	0.0260697				UBC	ZNF8	0.487807	0.893975
	CENPJ	STIL	0.174281	0.0260697				DDX46	LMNA	0.494382	0.891826
	EPHB2	HMMR	0.174281	0.0260697				MTMR1	UBC	0.494382	0.891826
	HMMR	UBC	0.174281	0.0260697				CTBP2	KLF3	0.497744	0.890719
	ICT1	OXA1L	0.174281	0.0260697				FHL3	KLF3	0.497744	0.890719
	KDM3A	MKL1	0.174281	0.0260697				KDM1A	KLF3	0.497744	0.890719
	MKL1	MKL2	0.174281	0.0260697				LMNA	LMNB1	0.501156	0.889588
	MKL1	MYC	0.174281	0.0260697				ETV3	MYC	0.501156	0.889588
	MKL1	NCOA3	0.174281	0.0260697				G3BP2	WDR36	0.501156	0.889588
	MKL1	SMAD3	0.174281	0.0260697				BBC3	MCL1	0.508138	0.887256
	MKL1	SSRP1	0.174281	0.0260697				TAF6	TAF7	0.511709	0.886052
	MKL1	UBC	0.174281	0.0260697				AHR	TAF6	0.511709	0.886052
	OXA1L	SDHB	0.174281	0.0260697				CHD3	TAF6	0.511709	0.886052
	PEX1	PEX14	0.174281	0.0260697				ERCC1	TAF6	0.511709	0.886052
	PEX1	PEX26	0.174281	0.0260697				HDAC1	TAF6	0.511709	0.886052
	PEX1	UBC	0.174281	0.0260697				HDAC2	TAF6	0.511709	0.886052
	DLX5	MSX1	0.184357	0.0280189				KAT2A	TAF6	0.511709	0.886052
	ING4	MSX1	0.184357	0.0280189				NFYA	TAF6	0.511709	0.886052
	MED19	MSX1	0.184357	0.0280189				NFYB	TAF6	0.511709	0.886052
	MSX1	SP1	0.184357	0.0280189				RAN	TAF6	0.511709	0.886052
	MSX1	SUMO1	0.184357	0.0280189				RBBP4	TAF6	0.511709	0.886052
	MSX1	TAF1	0.184357	0.0280189				RBBP7	TAF6	0.511709	0.886052
	MSX1	TBP	0.184357	0.0280189				SAP30	TAF6	0.511709	0.886052
	MSX1	TLE1	0.184357	0.0280189				SIN3A	TAF6	0.511709	0.886052
	MSX1	TLE2	0.184357	0.0280189				TAF1	TAF6	0.511709	0.886052
	MSX1	TLE4	0.184357	0.0280189				TAF10	TAF6	0.511709	0.886052
	MSX1	UBC	0.184357	0.0280189				TAF11	TAF6	0.511709	0.886052
	GALC	TRAF3	0.19581	0.0302831				TAF12	TAF6	0.511709	0.886052
	NRF1	OXSM	0.19581	0.0302831				TAF13	TAF6	0.511709	0.886052
	AP2A2	FCHO2	0.19581	0.0302831				TAF2	TAF6	0.511709	0.886052
	ARRB2	TRAF3	0.19581	0.0302831				TAF3	TAF6	0.511709	0.886052
	BIRC2	TRAF3	0.19581	0.0302831				TAF6	TAF8	0.511709	0.886052
	BIRC3	TRAF3	0.19581	0.0302831				TAF6	TAF9	0.511709	0.886052
	BRAF	TRAF3	0.19581	0.0302831				TAF6	TBPL1	0.511709	0.886052
	CASP3	TRAF3	0.19581	0.0302831				TAF6	TRRAP	0.511709	0.886052
	CBLB	TRAF3	0.19581	0.0302831				TAF6	UBC	0.511709	0.886052
	CD27	TRAF3	0.19581	0.0302831				TAF6	USF1	0.511709	0.886052
	CFLAR	TRAF3	0.19581	0.0302831				TAF6	TAF9B	0.519021	0.883567
	DAXX	TRAF3	0.19581	0.0302831				TAF6	TBP	0.522764	0.882282
	EED	PRKDC	0.19581	0.0302831				AP2A1	DAB2	0.522764	0.882282
	IRF1	TRAF3	0.19581	0.0302831				FLNB	KLHL2	0.525293	0.881411
	IRF3	TRAF3	0.19581	0.0302831				CCNE1	RBX1	0.530431	0.879627
	MAVS	TRAF3	0.19581	0.0302831				BRCA1	CCNE1	0.530431	0.879627
	MEIS2	PBX1	0.19581	0.0302831				BRCA2	CCNE1	0.530431	0.879627
	MEIS2	SP1	0.19581	0.0302831				CCNE1	CDC6	0.530431	0.879627
	MYD88	TRAF3	0.19581	0.0302831				CCNE1	CDK1	0.530431	0.879627
	NFKB2	TRAF3	0.19581	0.0302831				CCNE1	CDK2	0.530431	0.879627
	NLRX1	TRAF3	0.19581	0.0302831				CCNE1	CDK3	0.530431	0.879627
	NUP62	TRAF3	0.19581	0.0302831				CCNE1	CDK5	0.530431	0.879627
	OPTN	TRAF3	0.19581	0.0302831				CCNE1	CDK6	0.530431	0.879627
	OTUB1	TRAF3	0.19581	0.0302831				CCNE1	CDT1	0.530431	0.879627
	OTUD5	TRAF3	0.19581	0.0302831				CCNE1	CUL1	0.530431	0.879627
	RBM14	TRAF3	0.19581	0.0302831				CCNE1	CUL3	0.530431	0.879627
	RIPK1	TRAF3	0.19581	0.0302831				CCNE1	CUL4A	0.530431	0.879627
	RRAS2	TRAF3	0.19581	0.0302831				CCNE1	CUL4B	0.530431	0.879627
	SAR1A	TRAF3	0.19581	0.0302831				CCNE1	E2F1	0.530431	0.879627
	SMC5	SMC6	0.19581	0.0302831				CCNE1	E2F4	0.530431	0.879627
	SMC6	SUMO1	0.19581	0.0302831				CCNE1	FBXW7	0.530431	0.879627
	SRC	TRAF3	0.19581	0.0302831				CCNE1	FOXM1	0.530431	0.879627
	SUMO1	TRAF3	0.19581	0.0302831				CCNE1	GSK3B	0.530431	0.879627
	TANK	TRAF3	0.19581	0.0302831				CCNE1	HERC5	0.530431	0.879627
	TBK1	TRAF3	0.19581	0.0302831				CCNE1	MCM3	0.530431	0.879627
	TFG	TRAF3	0.19581	0.0302831				CCNE1	NBN	0.530431	0.879627
	TLR4	TRAF3	0.19581	0.0302831				CCNE1	NPAT	0.530431	0.879627
	TLR9	TRAF3	0.19581	0.0302831				CCNE1	PIN1	0.530431	0.879627
	TNIP1	TRAF3	0.19581	0.0302831				CCNE1	PRC1	0.530431	0.879627
	TRADD	TRAF3	0.19581	0.0302831				CCNE1	RBL1	0.530431	0.879627
	TRAF2	TRAF3	0.19581	0.0302831				CCNE1	RRN3	0.530431	0.879627
	TRAF3	TRAF5	0.19581	0.0302831				CCNE1	SKP2	0.530431	0.879627
	TRAF3	TRAIP	0.19581	0.0302831				NCOR1	TAF6	0.530431	0.879627
	TRAF3	UBC	0.19581	0.0302831				PEX5	ZADH2	0.533567	0.878531
	TRAF3	UBE2O	0.19581	0.0302831				BLCAP	ESR1	0.534358	0.878254
	TRAF3	UCHL1	0.19581	0.0302831				DVL3	KLF3	0.536124	0.877634
	TRAF3	USO1	0.19581	0.0302831				BUB1	MAPK3	0.538349	0.87685
	TRAF3	WDR5	0.19581	0.0302831				CCNE1	CDK4	0.538349	0.87685
	IL15	IL2RB	0.201762	0.0314802				CCNE1	RBL2	0.538349	0.87685
	IL15	IL2RG	0.206495	0.0324421				CCNE1	UHRF2	0.538349	0.87685
	DDX58	TRAF3	0.224215	0.0361209				AP3M1	AP3S1	0.544872	0.874534
	KANK2	NOS3	0.224215	0.0361209				AKT1	GSK3A	0.54653	0.873941
	AP2A1	AP2A2	0.224215	0.0361209				LNX1	ZADH2	0.549879	0.872739
	BST2	MYD88	0.224215	0.0361209				AP3B1	AP3M1	0.554208	0.871175
	BST2	TAB2	0.224215	0.0361209				AP3M1	TRIM9	0.554208	0.871175
	BST2	UBC	0.224215	0.0361209				AP3M1	UBC	0.554208	0.871175
	GIPC1	NTRK2	0.224215	0.0361209				AP3M1	WDR48	0.554208	0.871175
	JAZF1	UBC	0.224215	0.0361209				ASXL2	NRF1	0.554988	0.870891
	PEF1	TFG	0.229561	0.0372549				AP3M1	AP3S2	0.557345	0.870034
	HAX1	RGS1	0.231035	0.0375694				BMP4	BMPR2	0.560099	0.869028
	EZH2	RPN2	0.235842	0.0386014				BMPR2	CRYAB	0.560099	0.869028
	ALG2	PEF1	0.23833	0.0391389				BMPR2	CTBP1	0.560099	0.869028
	HGS	PEF1	0.23833	0.0391389				BMPR2	LIMK1	0.560099	0.869028
	PDCD6	PEF1	0.23833	0.0391389				BMPR2	NOP56	0.560099	0.869028
	PEF1	UBC	0.240234	0.039552				BMPR2	SMAD6	0.560099	0.869028
	EIF3I	EIF3M	0.242173	0.0399739				BMPR2	SMAD7	0.560099	0.869028
	RAP1A	RGS14	0.242173	0.0399739				BMPR2	TRIB3	0.560099	0.869028
	RAP2A	RGS14	0.242173	0.0399739				BMPR2	XIAP	0.560099	0.869028
	RGS14	RND2	0.242173	0.0399739				ACVR1	BMPR2	0.560616	0.868838
	CDC42	PAK4	0.242173	0.0399739				BMPR2	GDF9	0.563215	0.867883
	GNA11	RGS14	0.242173	0.0399739				FLNB	RAD21	0.563738	0.867691
	GNAI1	RGS14	0.242173	0.0399739				AKT2	CASP3	0.563738	0.867691
	GNAI3	RGS14	0.242173	0.0399739				AKT2	CCNA2	0.563738	0.867691
	GRB2	PAK4	0.242173	0.0399739				AKT2	CDC37	0.563738	0.867691
	HPDL	MECP2	0.242173	0.0399739				AKT2	EGFR	0.563738	0.867691
	LATS2	PAK4	0.242173	0.0399739				AKT2	ESR1	0.563738	0.867691
	LIMK1	PAK4	0.242173	0.0399739				AKT2	FOXO4	0.563738	0.867691
	LRRK1	PAK4	0.242173	0.0399739				AKT2	GRK5	0.563738	0.867691
	NFKB1	RGS14	0.242173	0.0399739				AKT2	GSK3B	0.563738	0.867691
	PAK4	RAC1	0.242173	0.0399739				AKT2	LAMC1	0.563738	0.867691
	PAK4	RAN	0.242173	0.0399739				AKT2	MARK2	0.563738	0.867691
	PAK4	SRPK1	0.242173	0.0399739				AKT2	MTCP1	0.563738	0.867691
	PAK4	UBC	0.242173	0.0399739				AKT2	MYH9	0.563738	0.867691
	RGS14	RND1	0.242173	0.0399739				AKT2	NAMPT	0.563738	0.867691
	RGS14	RND3	0.242173	0.0399739				AKT2	NCK1	0.563738	0.867691
	RGS14	TRAF2	0.242173	0.0399739				AKT2	NCK2	0.563738	0.867691
	RGS14	XPO1	0.242173	0.0399739				AKT2	ROCK1	0.563738	0.867691
	CRK	TTBK2	0.251437	0.0420109				AKT2	RPA2	0.563738	0.867691
	PTEN	TTBK2	0.251437	0.0420109				AKT2	SDK1	0.563738	0.867691
	TTBK2	ZWINT	0.251437	0.0420109				AKT2	SKI	0.563738	0.867691
	ARL6	BBS1	0.252407	0.042226				AKT2	SNX27	0.563738	0.867691
	ARL6	BBS4	0.252407	0.042226				AKT2	STAT6	0.563738	0.867691
	ARL6	BBS7	0.252407	0.042226				AKT2	TMED2	0.563738	0.867691
	ARL6	TTC8	0.252407	0.042226				AKT2	TRIB3	0.563738	0.867691
	KIF11	ULK2	0.253604	0.042492				AKT2	TTC3	0.563738	0.867691
	RPN2	UBL4A	0.25457	0.0427073				AKT2	UBC	0.563738	0.867691
	ADRM1	RPN2	0.25457	0.0427073				BTAF1	PIAS4	0.565972	0.866866
	ARF6	RPN2	0.25457	0.0427073				AKT2	CSDE1	0.565972	0.866866
	AUP1	RPN2	0.25457	0.0427073				BTAF1	MYC	0.565972	0.866866
	BRE	RPN2	0.25457	0.0427073				BTAF1	SNW1	0.565972	0.866866
	CLN3	RPN2	0.25457	0.0427073				BTAF1	TBP	0.565972	0.866866
	ESR1	RPN2	0.25457	0.0427073				BTAF1	TFAP4	0.565972	0.866866
	GSTK1	RPN2	0.25457	0.0427073				BTAF1	UBC	0.565972	0.866866
	MYC	RPN2	0.25457	0.0427073				ACAD9	NRF1	0.56873	0.865843
	NDRG1	RPN2	0.25457	0.0427073				ACTB	NRF1	0.56873	0.865843
	PDIA3	RPN2	0.25457	0.0427073				ACTN4	NRF1	0.56873	0.865843
	RHOA	RPN2	0.25457	0.0427073				AEBP2	NRF1	0.56873	0.865843
	RPN1	RPN2	0.25457	0.0427073				ALG8	NRF1	0.56873	0.865843
	RPN2	SAP18	0.25457	0.0427073				AMACR	NRF1	0.56873	0.865843
	RPN2	STT3B	0.25457	0.0427073				ARL5A	NRF1	0.56873	0.865843
	TTBK2	UBC	0.255367	0.042885				CBR1	NRF1	0.56873	0.865843
	EIF3F	GLE1	0.258519	0.0435904				CBX5	NRF1	0.56873	0.865843
	BST2	TAB1	0.263649	0.0447471				CCS	NRF1	0.56873	0.865843
	JAK1	RAF1	0.263649	0.0447471				CDK1	NRF1	0.56873	0.865843
	JAK1	TEC	0.263649	0.0447471				CDNF	NRF1	0.56873	0.865843
	UBR1	UCHL3	0.263649	0.0447471				CEBPB	NRF1	0.56873	0.865843
	ABL1	JAK1	0.263649	0.0447471				CHD2	NRF1	0.56873	0.865843
	ABL2	JAK1	0.263649	0.0447471				CHD3	NRF1	0.56873	0.865843
	AP2A2	NUMB	0.263649	0.0447471				CLOCK	NRF1	0.56873	0.865843
	ARRB1	JAK1	0.263649	0.0447471				CNBP	NRF1	0.56873	0.865843
	ATR	CLSPN	0.263649	0.0447471				CNNM3	NRF1	0.56873	0.865843
	BRCA1	CLSPN	0.263649	0.0447471				COG1	NRF1	0.56873	0.865843
	BRCA1	JAK1	0.263649	0.0447471				COX5B	NRF1	0.56873	0.865843
	BTK	JAK1	0.263649	0.0447471				COX6C	NRF1	0.56873	0.865843
	CASP7	CLSPN	0.263649	0.0447471				CREB1	NRF1	0.56873	0.865843
	CCR1	JAK1	0.263649	0.0447471				DDX3X	NRF1	0.56873	0.865843
	CCR5	JAK1	0.263649	0.0447471				E2F1	NRF1	0.56873	0.865843
	CDC20	CLSPN	0.263649	0.0447471				FAS	NRF1	0.56873	0.865843
	CDC45	CLSPN	0.263649	0.0447471				FBXL8	NRF1	0.56873	0.865843
	CDC7	CLSPN	0.263649	0.0447471				FHL2	NRF1	0.56873	0.865843
	CDK9	CLSPN	0.263649	0.0447471				FITM2	NRF1	0.56873	0.865843
	CLSPN	MSH6	0.263649	0.0447471				FZD4	NRF1	0.56873	0.865843
	CLSPN	PCNA	0.263649	0.0447471				HDAC2	NRF1	0.56873	0.865843
	CLSPN	PLK1	0.263649	0.0447471				JAK2	NRF1	0.56873	0.865843
	CLSPN	PMS2	0.263649	0.0447471				LDHA	NRF1	0.56873	0.865843
	CLSPN	RAD17	0.263649	0.0447471				MACF1	NRF1	0.56873	0.865843
	CLSPN	UBC	0.263649	0.0447471				MED20	NRF1	0.56873	0.865843
	CSF3R	JAK1	0.263649	0.0447471				MEF2A	NRF1	0.56873	0.865843
	CXCR4	JAK1	0.263649	0.0447471				MMAA	NRF1	0.56873	0.865843
	DLG4	JAK1	0.263649	0.0447471				MMP17	NRF1	0.56873	0.865843
	EGFR	JAK1	0.263649	0.0447471				MRS2	NRF1	0.56873	0.865843
	ELF3	JAK1	0.263649	0.0447471				MTCH2	NRF1	0.56873	0.865843
	ELP2	JAK1	0.263649	0.0447471				NAA50	NRF1	0.56873	0.865843
	ERBB2	JAK1	0.263649	0.0447471				NAMPT	NRF1	0.56873	0.865843
	FES	JAK1	0.263649	0.0447471				NDEL1	NRF1	0.56873	0.865843
	GRB2	JAK1	0.263649	0.0447471				NPRL3	NRF1	0.56873	0.865843
	IGF1R	JAK1	0.263649	0.0447471				NRF1	P4HA1	0.56873	0.865843
	IL2RB	JAK1	0.263649	0.0447471				NRF1	PPRC1	0.56873	0.865843
	IL2RG	JAK1	0.263649	0.0447471				NRF1	PUS7L	0.56873	0.865843
	IL3RA	JAK1	0.263649	0.0447471				NRF1	RBBP7	0.56873	0.865843
	INSR	JAK1	0.263649	0.0447471				NRF1	RNF4	0.56873	0.865843
	IRS2	JAK1	0.263649	0.0447471				NRF1	RUNX2	0.56873	0.865843
	JAK1	MDM2	0.263649	0.0447471				NRF1	SCO2	0.56873	0.865843
	JAK1	PLCG2	0.263649	0.0447471				NRF1	SELT	0.56873	0.865843
	JAK1	SHB	0.263649	0.0447471				NRF1	SESN1	0.56873	0.865843
	JAK1	SOCS1	0.263649	0.0447471				NRF1	SETD4	0.56873	0.865843
	JAK1	SOCS3	0.263649	0.0447471				NRF1	SIN3B	0.56873	0.865843
	JAK1	STAM2	0.263649	0.0447471				NRF1	SMAD4	0.56873	0.865843
	JAK1	STAT1	0.263649	0.0447471				NRF1	SOCS1	0.56873	0.865843
	JAK1	STAT2	0.263649	0.0447471				NRF1	SPPL3	0.56873	0.865843
	JAK1	STAT3	0.263649	0.0447471				NRF1	SYPL1	0.56873	0.865843
	JAK1	STAT6	0.263649	0.0447471				NRF1	TBCA	0.56873	0.865843
	JAK1	TYK2	0.263649	0.0447471				NRF1	TGIF1	0.56873	0.865843
	JAK1	UBC	0.263649	0.0447471				NRF1	TMF1	0.56873	0.865843
	PAK4	SRPK2	0.263649	0.0447471				NRF1	TOP1	0.56873	0.865843
	PSMD3	PSMD6	0.263649	0.0447471				NRF1	TPR	0.56873	0.865843
	TRAF1	TRAF3	0.263649	0.0447471				NRF1	TPRA1	0.56873	0.865843
	PEX19	PMP22	0.273477	0.0469915				NRF1	UBC	0.56873	0.865843
	CCNE1	RBX1	0.280494	0.0486172				NRF1	UNKL	0.56873	0.865843
	DDB1	RBX1	0.280494	0.0486172				NRF1	VDAC2	0.56873	0.865843
	DDB2	RBX1	0.280494	0.0486172				NRF1	WDFY2	0.56873	0.865843
	RBX1	TAB1	0.280494	0.0486172				NRF1	XRCC6	0.56873	0.865843
	BRCA1	RBX1	0.280494	0.0486172				NRF1	ZBTB2	0.56873	0.865843
	CAND1	RBX1	0.280494	0.0486172				NRF1	ZBTB4	0.56873	0.865843
	CASP3	RBX1	0.280494	0.0486172				LENG8	NRF1	0.56974	0.865467
	CBX5	SCAI	0.280494	0.0486172				BMPR2	FST	0.570097	0.865334
	CCNA2	RBX1	0.280494	0.0486172				ASF1A	CDAN1	0.5705	0.865184
	CCND1	RBX1	0.280494	0.0486172				ASXL2	NRF1	0.5705	0.865184
	CCND2	RBX1	0.280494	0.0486172				ASF1A	ASF1B	0.5705	0.865184
	CCND3	RBX1	0.280494	0.0486172				ASF1A	ESR1	0.5705	0.865184
	CCNF	RBX1	0.280494	0.0486172				ASF1A	HIRA	0.5705	0.865184
	CORO7	RBX1	0.280494	0.0486172				ASF1A	RBBP4	0.5705	0.865184
	CRBN	RBX1	0.280494	0.0486172				ASF1A	TAF1	0.5705	0.865184
	CUL1	RBX1	0.280494	0.0486172				ASF1A	TLK1	0.5705	0.865184
	CUL2	RBX1	0.280494	0.0486172				ASF1A	TLK2	0.5705	0.865184
	CUL3	RBX1	0.280494	0.0486172				ASF1A	UBC	0.5705	0.865184
	CUL4A	RBX1	0.280494	0.0486172				ASF1A	VPS28	0.5705	0.865184
	CUL4B	RBX1	0.280494	0.0486172				NRF1	OXSM	0.570754	0.865089
	CUL5	RBX1	0.280494	0.0486172				AP3D1	AP3M1	0.571123	0.864951
	CUL7	RBX1	0.280494	0.0486172				ASF1A	NASP	0.571644	0.864757
	CUL9	RBX1	0.280494	0.0486172				NRF1	PARK7	0.571771	0.864709
	DET1	RBX1	0.280494	0.0486172				EIF3I	RAD21	0.572793	0.864327
	E2F1	RBX1	0.280494	0.0486172				DAB2	DVL3	0.572793	0.864327
	ENC1	RBX1	0.280494	0.0486172				ETV5	NRF1	0.572793	0.864327
	ERCC8	RBX1	0.280494	0.0486172				CSDE1	PAIP1	0.574642	0.863634
	EZH2	RBX1	0.280494	0.0486172				CUL3	PAIP1	0.574642	0.863634
	FBXL5	RBX1	0.280494	0.0486172				PAIP1	UBC	0.574642	0.863634
	FBXW2	RBX1	0.280494	0.0486172				FGFR1	FRS2	0.576505	0.862933
	FBXW5	RBX1	0.280494	0.0486172				PAIP1	UBR5	0.576505	0.862933
	FBXW7	RBX1	0.280494	0.0486172				JPH4	NRF1	0.57692	0.862777
	FBXW8	RBX1	0.280494	0.0486172				HSF1	NRF1	0.582171	0.860788
	GLMN	RBX1	0.280494	0.0486172				NRF1	ZBED4	0.5843	0.859977
	HAX1	RBX1	0.280494	0.0486172				ABTB1	CUL3	0.585371	0.859567
	HIF1A	RBX1	0.280494	0.0486172				ABTB1	SMAD2	0.585371	0.859567
	HINT1	RBX1	0.280494	0.0486172				ACAP2	FLNB	0.586986	0.858949
	HSPB1	RBX1	0.280494	0.0486172				ACTN4	FLNB	0.586986	0.858949
	IDH3G	RBX1	0.280494	0.0486172				AKAP1	FLNB	0.586986	0.858949
	ING3	RBX1	0.280494	0.0486172				ATM	FLNB	0.586986	0.858949
	KEAP1	RBX1	0.280494	0.0486172				BOC	FLNB	0.586986	0.858949
	MED8	RBX1	0.280494	0.0486172				BPTF	FLNB	0.586986	0.858949
	MTSS1	RBX1	0.280494	0.0486172				BTF3	FLNB	0.586986	0.858949
	MYB	RBX1	0.280494	0.0486172				C1QBP	FLNB	0.586986	0.858949
	NEDD4	RBX1	0.280494	0.0486172				CADM1	FLNB	0.586986	0.858949
	NEDD8	RBX1	0.280494	0.0486172				CALR	FLNB	0.586986	0.858949
	OS9	RBX1	0.280494	0.0486172				CDK2	FLNB	0.586986	0.858949
	PSMD7	RBX1	0.280494	0.0486172				CHD4	FLNB	0.586986	0.858949
	RBX1	RFWD2	0.280494	0.0486172				CKAP4	FLNB	0.586986	0.858949
	RBX1	SKP1	0.280494	0.0486172				CRK	FLNB	0.586986	0.858949
	RBX1	SKP2	0.280494	0.0486172				DDX5	FLNB	0.586986	0.858949
	RBX1	SMAD3	0.280494	0.0486172				DLG4	FLNB	0.586986	0.858949
	RBX1	UBC	0.280494	0.0486172				ENC1	FLNB	0.586986	0.858949
	RBX1	UBXN7	0.280494	0.0486172				ESR1	FLNB	0.586986	0.858949
	RBX1	VHL	0.280494	0.0486172				FLNB	FLNC	0.586986	0.858949
	RBX1	VPRBP	0.280494	0.0486172				FLNB	G3BP1	0.586986	0.858949
	PSPC1	WBP4	0.289848	0.0508147				FLNB	GRB2	0.586986	0.858949
	APC	NAV2	0.289848	0.0508147				FLNB	HCFC1	0.586986	0.858949
	HDAC6	NAV2	0.289848	0.0508147				FLNB	HIPK3	0.586986	0.858949
	ING5	NAV2	0.289848	0.0508147				FLNB	HSPB1	0.586986	0.858949
	NAV2	PIAS2	0.289848	0.0508147				FLNB	LAMC1	0.586986	0.858949
	NEDD4	TTYH2	0.299922	0.0532202				FLNB	MLH1	0.586986	0.858949
	CD14	TLR3	0.300761	0.0534225				FLNB	NCK1	0.586986	0.858949
	CSK	TLR3	0.300761	0.0534225				FLNB	NFKB1	0.586986	0.858949
	IRAK2	TLR3	0.300761	0.0534225				FLNB	NPAT	0.586986	0.858949
	MYD88	TLR3	0.300761	0.0534225				FLNB	OTUD1	0.586986	0.858949
	RIPK1	TLR3	0.300761	0.0534225				FLNB	PCBP1	0.586986	0.858949
	SRC	TLR3	0.300761	0.0534225				FLNB	PLCG1	0.586986	0.858949
	TAB2	TLR3	0.300761	0.0534225				FLNB	PTK7	0.586986	0.858949
	TBK1	TLR3	0.300761	0.0534225				FLNB	RAC1	0.586986	0.858949
	TLR3	TRAF6	0.300761	0.0534225				FLNB	RASA1	0.586986	0.858949
	SAT1	TACO1	0.305256	0.0545104				FLNB	RORA	0.586986	0.858949
	TACO1	UBC	0.305256	0.0545104				FLNB	SF3B2	0.586986	0.858949
	BMPR2	FST	0.30856	0.0553151				FLNB	SNW1	0.586986	0.858949
	TLR3	TRAF3	0.30856	0.0553151				FLNB	SRC	0.586986	0.858949
	UBE2A	UBR1	0.30856	0.0553151				FLNB	STAU1	0.586986	0.858949
	EIF1B	EIF3G	0.309075	0.055441				FLNB	STK4	0.586986	0.858949
	CDC37	EIF1B	0.309075	0.055441				FLNB	SYNPO	0.586986	0.858949
	EIF1B	EIF3A	0.309075	0.055441				FLNB	TDG	0.586986	0.858949
	EIF1B	EIF3D	0.309075	0.055441				FLNB	TIMP3	0.586986	0.858949
	EIF1B	EIF3E	0.309075	0.055441				FLNB	TRIP6	0.586986	0.858949
	EIF1B	EIF3H	0.309075	0.055441				FLNB	UBC	0.586986	0.858949
	EIF1B	EIF3K	0.309075	0.055441				FLNB	WSB1	0.586986	0.858949
	EIF1B	EIF3L	0.309075	0.055441				FLNB	ZC3H4	0.586986	0.858949
	EIF1B	ERH	0.309075	0.055441				FLNB	LRP1	0.589426	0.85801
	EIF1B	PCNA	0.309075	0.055441				FLNB	WAC	0.589426	0.85801
	EIF1B	PEX19	0.309075	0.055441				FAT1	FLNB	0.589426	0.85801
	EIF1B	PINX1	0.309075	0.055441				FLNB	PCBP2	0.589426	0.85801
	EIF1B	PSME3	0.309075	0.055441				EIF3G	FLNB	0.591888	0.85706
	EIF1B	RAB7A	0.309075	0.055441				ARSA	CETN2	0.591888	0.85706
	EIF1B	RHOB	0.309075	0.055441				CDCA5	CETN2	0.591888	0.85706
	EIF1B	TSR1	0.309075	0.055441				CETN2	CP110	0.591888	0.85706
	TAB1	TAB3	0.310806	0.0558648				CETN2	PARP1	0.591888	0.85706
	EIF1B	EIF3F	0.31168	0.0560791				CETN2	SFI1	0.591888	0.85706
	ESR1	KDM5A	0.312433	0.0562642				CETN2	UBC	0.591888	0.85706
	EZH2	KDM5A	0.312433	0.0562642				CETN2	XPC	0.591888	0.85706
	HDAC1	KDM5A	0.312433	0.0562642				DAG1	FLNB	0.591888	0.85706
	HDAC2	KDM5A	0.312433	0.0562642				NRF1	TMEM9	0.592989	0.856633
	KDM5A	RARA	0.312433	0.0562642				FLNA	FLNB	0.594372	0.856096
	KDM5A	RBL1	0.312433	0.0562642				FLNB	RAD21	0.595205	0.855772
	KDM5A	SIN3B	0.312433	0.0562642				TAF5	TAF6	0.601962	0.853126
	KDM5A	SUZ12	0.312433	0.0562642				ALS2	RAB5A	0.601962	0.853126
	KDM5A	TBP	0.312433	0.0562642				ALS2	RAC1	0.601962	0.853126
	KDM5A	UBC	0.312433	0.0562642				LMNA	LMNB2	0.601962	0.853126
	KDM5A	VDR	0.312433	0.0562642				MYC	SBNO2	0.601962	0.853126
	BECN1	MCL1	0.322607	0.0587859				SBNO2	UBC	0.601962	0.853126
	CLSPN	RAD9A	0.322607	0.0587859				APBA3	NRF1	0.604251	0.852222
	DHX9	EED	0.322607	0.0587859				FLNB	MYLK	0.609764	0.850031
	GATA2	HHEX	0.322607	0.0587859				FGFR2	FRS2	0.612413	0.84897
	HMMR	TPX2	0.322607	0.0587859				MED26	TAF6	0.612413	0.84897
	PSMD2	PSMD6	0.322607	0.0587859				AKT1	AKT2	0.612413	0.84897
	RAP2A	RGS14	0.322607	0.0587859				BRCA1	HLTF	0.612413	0.84897
	TLR3	TRAF3	0.322607	0.0587859				CDC5L	HLTF	0.612413	0.84897
	ABCF1	DHX9	0.322607	0.0587859				CDK9	HLTF	0.612413	0.84897
	ACTB	DHX9	0.322607	0.0587859				CHFR	HLTF	0.612413	0.84897
	AP4B1	AP4M1	0.322607	0.0587859				HLTF	PCNA	0.612413	0.84897
	AP4M1	ARF1	0.322607	0.0587859				HLTF	SHPRH	0.612413	0.84897
	AP4M1	DDX52	0.322607	0.0587859				HLTF	SNW1	0.612413	0.84897
	AP4M1	LAMP2	0.322607	0.0587859				HLTF	SP1	0.612413	0.84897
	AP4M1	UBC	0.322607	0.0587859				HLTF	SP3	0.612413	0.84897
	APBB1	DHX9	0.322607	0.0587859				HLTF	UBC	0.612413	0.84897
	ARF6	DHX9	0.322607	0.0587859				HLTF	UBE2B	0.612413	0.84897
	ARPC2	TPRKB	0.322607	0.0587859				HLTF	UBE2N	0.612413	0.84897
	ARPC4	TPRKB	0.322607	0.0587859				HLTF	UBE2Z	0.612413	0.84897
	ARPC5	TPRKB	0.322607	0.0587859				LMNB1	URB2	0.614193	0.848254
	ASB3	ASB6	0.322607	0.0587859				RAF1	WDR83	0.626969	0.843047
	ASB6	CUL4B	0.322607	0.0587859				AQR	WDR83	0.626969	0.843047
	ASB6	CUL5	0.322607	0.0587859				GPKOW	WDR83	0.626969	0.843047
	ASB6	HDGF	0.322607	0.0587859				HSPB1	WDR83	0.626969	0.843047
	ATG12	BECN1	0.322607	0.0587859				LSM3	WDR83	0.626969	0.843047
	ATG3	BECN1	0.322607	0.0587859				PPIL1	WDR83	0.626969	0.843047
	ATG5	BECN1	0.322607	0.0587859				SF3B4	WDR83	0.626969	0.843047
	ATN1	IRF9	0.322607	0.0587859				UBC	WDR83	0.626969	0.843047
	BCL2	BECN1	0.322607	0.0587859				UBL5	WDR83	0.626969	0.843047
	BECN1	BIRC5	0.322607	0.0587859				EIF1B	EIF3I	0.628137	0.842565
	BECN1	DAPK1	0.322607	0.0587859				TOE1	WDR83	0.630724	0.841494
	BECN1	DZIP3	0.322607	0.0587859				FLNB	ISG15	0.631671	0.8411
	BECN1	EXOC2	0.322607	0.0587859				CTCF	EED	0.634528	0.839909
	BECN1	EXOC4	0.322607	0.0587859				CTCF	RXRA	0.634528	0.839909
	BECN1	EXOC8	0.322607	0.0587859				BMI1	CTCF	0.634528	0.839909
	BECN1	GOPC	0.322607	0.0587859				CAND1	CTCF	0.634528	0.839909
	BECN1	ITCH	0.322607	0.0587859				CHD1L	CTCF	0.634528	0.839909
	BECN1	MYH10	0.322607	0.0587859				CHD7	CTCF	0.634528	0.839909
	BECN1	MYH9	0.322607	0.0587859				CHD8	CTCF	0.634528	0.839909
	BECN1	MYL6	0.322607	0.0587859				CTCF	HMGB1	0.634528	0.839909
	BECN1	NEDD4	0.322607	0.0587859				CTCF	PARP1	0.634528	0.839909
	BECN1	NRBF2	0.322607	0.0587859				CTCF	RALA	0.634528	0.839909
	BECN1	RALB	0.322607	0.0587859				CTCF	SIN3A	0.634528	0.839909
	BECN1	SMC3	0.322607	0.0587859				CTCF	SMAD3	0.634528	0.839909
	BECN1	SRP72	0.322607	0.0587859				CTCF	SMAD4	0.634528	0.839909
	BECN1	TAB2	0.322607	0.0587859				CTCF	SMC1A	0.634528	0.839909
	BECN1	TAB3	0.322607	0.0587859				CTCF	SMC3	0.634528	0.839909
	BECN1	TRAF6	0.322607	0.0587859				CTCF	SUMO1	0.634528	0.839909
	BECN1	TSC1	0.322607	0.0587859				CTCF	SUMO2	0.634528	0.839909
	BECN1	UBC	0.322607	0.0587859				CTCF	SUMO3	0.634528	0.839909
	BECN1	UVRAG	0.322607	0.0587859				CTCF	SUZ12	0.634528	0.839909
	BECN1	WIPI1	0.322607	0.0587859				CTCF	TFAP4	0.634528	0.839909
	BECN1	XPO1	0.322607	0.0587859				CTCF	TOP2A	0.634528	0.839909
	BECN1	ZWINT	0.322607	0.0587859				CTCF	UBC	0.634528	0.839909
	BRCA1	DHX9	0.322607	0.0587859				CTCF	ZMYM2	0.634528	0.839909
	C1QBP	HABP4	0.322607	0.0587859				CUL3	SDHA	0.634528	0.839909
	CAB39	STK39	0.322607	0.0587859				DVL3	FLNB	0.634528	0.839909
	CAND1	DHX9	0.322607	0.0587859				EFNB1	TIAM1	0.634528	0.839909
	CBL	EPHB6	0.322607	0.0587859				SDHA	SDHB	0.634528	0.839909
	CDK2	DHX9	0.322607	0.0587859				SDHA	UBC	0.634528	0.839909
	CDK2	PGK1	0.322607	0.0587859				PSMD2	PSMD3	0.637925	0.838484
	CHD3	HABP4	0.322607	0.0587859				FRS2	NTRK2	0.641498	0.836975
	CIRBP	HABP4	0.322607	0.0587859				ZHX2	ZHX3	0.646236	0.834958
	CNBP	DHX9	0.322607	0.0587859				NRF1	WDR4	0.646236	0.834958
	CRK	DHX9	0.322607	0.0587859				BRD1	MAGI3	0.650241	0.833239
	CRK	EPHB6	0.322607	0.0587859				FZD4	MAGI3	0.650241	0.833239
	CRKL	EPHB6	0.322607	0.0587859				FZD7	MAGI3	0.650241	0.833239
	CUL1	DHX9	0.322607	0.0587859				MAGI3	MED28	0.650241	0.833239
	CUL2	DHX9	0.322607	0.0587859				MAGI3	PTEN	0.650241	0.833239
	CUL3	DHX9	0.322607	0.0587859				MAGI3	TGFA	0.650241	0.833239
	CUL5	DHX9	0.322607	0.0587859				MAGI3	UBC	0.650241	0.833239
	DAXX	HABP4	0.322607	0.0587859				UBE3C	WDR92	0.651049	0.832891
	DBNL	TPRKB	0.322607	0.0587859				CUL3	KCTD9	0.651588	0.832658
	DDX1	DHX9	0.322607	0.0587859				KCTD9	PNKD	0.651588	0.832658
	DDX17	DHX9	0.322607	0.0587859				KCTD9	UBC	0.651588	0.832658
	DDX20	DHX9	0.322607	0.0587859				DVL2	LYN	0.65841	0.829691
	DDX21	DHX9	0.322607	0.0587859				EP300	GATA2	0.65841	0.829691
	DDX5	DHX9	0.322607	0.0587859				AP1M1	DVL2	0.65841	0.829691
	DDX58	RAI14	0.322607	0.0587859				APC	DVL2	0.65841	0.829691
	DGCR8	DHX9	0.322607	0.0587859				ARRB1	DVL2	0.65841	0.829691
	DHX9	ESR1	0.322607	0.0587859				ARRB2	DVL2	0.65841	0.829691
	DHX9	EZH2	0.322607	0.0587859				ATN1	DVL2	0.65841	0.829691
	DHX9	FBXW4	0.322607	0.0587859				BAG3	DVL2	0.65841	0.829691
	DHX9	GLYR1	0.322607	0.0587859				BAHD1	DVL2	0.65841	0.829691
	DHX9	GRB2	0.322607	0.0587859				CPSF7	DVL2	0.65841	0.829691
	DHX9	GRK5	0.322607	0.0587859				DAAM1	DVL2	0.65841	0.829691
	DHX9	HDAC5	0.322607	0.0587859				DVL1	DVL2	0.65841	0.829691
	DHX9	HDGF	0.322607	0.0587859				DVL2	FZD4	0.65841	0.829691
	DHX9	HELQ	0.322607	0.0587859				DVL2	ITCH	0.65841	0.829691
	DHX9	HINFP	0.322607	0.0587859				DVL2	LRRK2	0.65841	0.829691
	DHX9	ILF2	0.322607	0.0587859				DVL2	MCRS1	0.65841	0.829691
	DHX9	ILF3	0.322607	0.0587859				DVL2	POLI	0.65841	0.829691
	DHX9	JUN	0.322607	0.0587859				DVL2	PPM1A	0.65841	0.829691
	DHX9	LBR	0.322607	0.0587859				DVL2	PRPF3	0.65841	0.829691
	DHX9	LGR4	0.322607	0.0587859				DVL2	RAC1	0.65841	0.829691
	DHX9	LYAR	0.322607	0.0587859				DVL2	RBPMS	0.65841	0.829691
	DHX9	MAP7	0.322607	0.0587859				DVL2	RHOA	0.65841	0.829691
	DHX9	MBD2	0.322607	0.0587859				DVL2	RNPS1	0.65841	0.829691
	DHX9	MBNL1	0.322607	0.0587859				DVL2	RUSC1	0.65841	0.829691
	DHX9	MEX3C	0.322607	0.0587859				DVL2	SNF8	0.65841	0.829691
	DHX9	NEDD8	0.322607	0.0587859				DVL2	SNIP1	0.65841	0.829691
	DHX9	NFIA	0.322607	0.0587859				DVL2	THAP1	0.65841	0.829691
	DHX9	NFKB2	0.322607	0.0587859				DVL2	TIFA	0.65841	0.829691
	DHX9	NMT1	0.322607	0.0587859				DVL2	TRAF2	0.65841	0.829691
	DHX9	NOP56	0.322607	0.0587859				DVL2	U2AF2	0.65841	0.829691
	DHX9	NXF1	0.322607	0.0587859				DVL2	UBAC1	0.65841	0.829691
	DHX9	PCNA	0.322607	0.0587859				DVL2	UBC	0.65841	0.829691
	DHX9	PINX1	0.322607	0.0587859				DVL2	UIMC1	0.65841	0.829691
	DHX9	PSMD8	0.322607	0.0587859				TFPT	UCHL5	0.65841	0.829691
	DHX9	PTRF	0.322607	0.0587859				MAGI3	PTPRB	0.662576	0.82786
	DHX9	RALY	0.322607	0.0587859				PAN2	PLEC	0.663777	0.82733
	DHX9	RBM4	0.322607	0.0587859				AP3M1	AP3S1	0.671076	0.824077
	DHX9	RBM8A	0.322607	0.0587859				E2F7	E2F8	0.671076	0.824077
	DHX9	RFC4	0.322607	0.0587859				AP2M1	DVL2	0.671076	0.824077
	DHX9	RIOK2	0.322607	0.0587859				LIF	LIFR	0.671076	0.824077
	DHX9	RRS1	0.322607	0.0587859				ATF4	LMNB1	0.672694	0.82335
	DHX9	SF3A2	0.322607	0.0587859				CASP3	LMNB1	0.672694	0.82335
	DHX9	SND1	0.322607	0.0587859				CDK1	LMNB1	0.672694	0.82335
	DHX9	SNW1	0.322607	0.0587859				DCTN2	LMNB1	0.672694	0.82335
	DHX9	SON	0.322607	0.0587859				DDX21	LMNB1	0.672694	0.82335
	DHX9	SRPK1	0.322607	0.0587859				GIT2	LMNB1	0.672694	0.82335
	DHX9	SSRP1	0.322607	0.0587859				LMNB1	MELK	0.672694	0.82335
	DHX9	STAU1	0.322607	0.0587859				LMNB1	NDEL1	0.672694	0.82335
	DHX9	SUMO1	0.322607	0.0587859				LMNB1	PASK	0.672694	0.82335
	DHX9	SUZ12	0.322607	0.0587859				LMNB1	ZWINT	0.672694	0.82335
	DHX9	TBP	0.322607	0.0587859				PGS1	WISP1	0.675411	0.822123
	DHX9	TOP1	0.322607	0.0587859				TRAF7	UBC	0.675411	0.822123
	DHX9	TOP2A	0.322607	0.0587859				RPAP3	WDR92	0.677002	0.821401
	DHX9	TRAF6	0.322607	0.0587859				UBC	WDR92	0.677002	0.821401
	DHX9	U2AF1	0.322607	0.0587859				VPS25	WDR92	0.677002	0.821401
	DHX9	UBC	0.322607	0.0587859				DDX58	TRAF3	0.6776	0.821129
	DHX9	WRN	0.322607	0.0587859				BAP1	IPO4	0.6776	0.821129
	DHX9	WWOX	0.322607	0.0587859				BRF2	IPO4	0.6776	0.821129
	DHX9	XPO1	0.322607	0.0587859				CEBPD	IPO4	0.6776	0.821129
	DHX9	XRCC5	0.322607	0.0587859				CIAO1	IPO4	0.6776	0.821129
	DHX9	XRCC6	0.322607	0.0587859				GSTK1	IPO4	0.6776	0.821129
	DHX9	ZMAT3	0.322607	0.0587859				HAT1	IPO4	0.6776	0.821129
	DISC1	PGK1	0.322607	0.0587859				IPO4	IPO5	0.6776	0.821129
	EED	PDS5B	0.322607	0.0587859				IPO4	MYC	0.6776	0.821129
	EFNB2	EPHB6	0.322607	0.0587859				IPO4	NEK6	0.6776	0.821129
	EHD1	STK39	0.322607	0.0587859				IPO4	NXF1	0.6776	0.821129
	EPHB1	EPHB6	0.322607	0.0587859				IPO4	TNPO1	0.6776	0.821129
	EPHB4	EPHB6	0.322607	0.0587859				FANCG	RTN2	0.679252	0.820377
	EPHB6	GRB2	0.322607	0.0587859				CBL	FRS2	0.679804	0.820125
	EPHB6	SAT1	0.322607	0.0587859				CRK	FRS2	0.679804	0.820125
	FEZ1	RAI14	0.322607	0.0587859				FRS2	GAB1	0.679804	0.820125
	FGFR2	PAK4	0.322607	0.0587859				FRS2	GRB2	0.679804	0.820125
	FNTA	RAP2A	0.322607	0.0587859				FRS2	INSR	0.679804	0.820125
	GRB2	RAI14	0.322607	0.0587859				FRS2	PAK1	0.679804	0.820125
	HABP4	PIAS3	0.322607	0.0587859				FRS2	RET	0.679804	0.820125
	HDAC5	PGK1	0.322607	0.0587859				FRS2	SRC	0.679804	0.820125
	HIF1A	PGK1	0.322607	0.0587859				FRS2	LYN	0.680912	0.819618
	IRF1	IRF9	0.322607	0.0587859				FRS2	PTPRF	0.680912	0.819618
	IRF9	MYO1F	0.322607	0.0587859				FRS2	SOS1	0.683139	0.818596
	IRF9	NFKB1	0.322607	0.0587859				FLOT1	FRS2	0.683139	0.818596
	IRF9	STAT1	0.322607	0.0587859				ASF1B	IPO4	0.684258	0.818081
	IRF9	STAT2	0.322607	0.0587859				FLNB	NPHP1	0.684258	0.818081
	ISG15	PGK1	0.322607	0.0587859				IPO4	VAV2	0.684258	0.818081
	ITSN1	RAI14	0.322607	0.0587859				PPT2	UBC	0.684258	0.818081
	JAK1	JAK3	0.322607	0.0587859				PSMD3	UCHL5	0.684258	0.818081
	LAGE3	TPRKB	0.322607	0.0587859				FURIN	PDGFA	0.688771	0.81599
	LPP	TPRKB	0.322607	0.0587859				PDGFA	PDGFB	0.688771	0.81599
	LRRK2	RAI14	0.322607	0.0587859				PDGFA	PLCG1	0.688771	0.81599
	MOCOS	UBC	0.322607	0.0587859				LMNA	LMNB1	0.691051	0.814926
	NRBF2	PGK1	0.322607	0.0587859				ATF2	ATF3	0.693346	0.813851
	OSGEP	TPRKB	0.322607	0.0587859				BIRC2	TRAF1	0.693346	0.813851
	PCNA	PGK1	0.322607	0.0587859				ATF2	PGAM1	0.695989	0.812606
	PCNA	STK39	0.322607	0.0587859				DBP	HLF	0.697984	0.811661
	PGK1	RAD21	0.322607	0.0587859				DDX58	PRKRA	0.697984	0.811661
	PGK1	UBC	0.322607	0.0587859				FSTL1	TGFB1	0.697984	0.811661
	RAI14	RIPK3	0.322607	0.0587859				HLF	MYB	0.697984	0.811661
	RALA	RAP2A	0.322607	0.0587859				SNRPA	WBP4	0.697984	0.811661
	RAP2A	RPTOR	0.322607	0.0587859				DCAF7	LATS2	0.70506	0.808278
	RAP2A	TNIK	0.322607	0.0587859				FGFR2	FRS2	0.705855	0.807895
	RAP2A	UBC	0.322607	0.0587859				BUB1	BUB3	0.707451	0.807123
	UBC	ZNF12	0.327611	0.0600418				AP1B1	BUB1	0.707451	0.807123
	EIF3I	TFE3	0.329317	0.0604724				AP2B1	BUB1	0.707451	0.807123
	CDC5L	KIF11	0.332561	0.0612942				AP3B1	BUB1	0.707451	0.807123
	CDK1	KIF11	0.332561	0.0612942				AP4B1	BUB1	0.707451	0.807123
	DCTN1	KIF11	0.332561	0.0612942				APC	BUB1	0.707451	0.807123
	KAT2B	KIF11	0.332561	0.0612942				BUB1	CDC20	0.707451	0.807123
	KIF11	UBC	0.332561	0.0612942				BUB1	CDK1	0.707451	0.807123
	FYN	PTPRE	0.334114	0.0616891				BUB1	CDK8	0.707451	0.807123
	GRB2	PTPRE	0.334114	0.0616891				BUB1	CENPE	0.707451	0.807123
	PTPRE	PTPRS	0.334114	0.0616891				BUB1	CRK	0.707451	0.807123
	PTPRE	SRC	0.334114	0.0616891				BUB1	DSN1	0.707451	0.807123
	AURKA	KIF11	0.336033	0.0621786				BUB1	HDAC1	0.707451	0.807123
	EIF3I	EIF3J	0.33746	0.0625434				BUB1	MIS12	0.707451	0.807123
	EIF1B	EIF3M	0.338155	0.0627216				BUB1	NDC80	0.707451	0.807123
	EIF3I	RAD21	0.338155	0.0627216				BUB1	NDEL1	0.707451	0.807123
	GATA2	PML	0.338155	0.0627216				BUB1	NSL1	0.707451	0.807123
	JAK1	TEC	0.338155	0.0627216				BUB1	NUF2	0.707451	0.807123
	ASAP1	TEC	0.338155	0.0627216				BUB1	PLK1	0.707451	0.807123
	DOK1	TEC	0.338155	0.0627216				BUB1	PMF1	0.707451	0.807123
	ERBB2	TEC	0.338155	0.0627216				BUB1	SMAD1	0.707451	0.807123
	GNA12	TEC	0.338155	0.0627216				BUB1	SVIL	0.707451	0.807123
	GNA13	TEC	0.338155	0.0627216				BUB1	TGFB1	0.707451	0.807123
	GRB2	TEC	0.338155	0.0627216				BUB1	UBC	0.707451	0.807123
	JAK2	TEC	0.338155	0.0627216				BUB1	UBR5	0.707451	0.807123
	MED28	TEC	0.338155	0.0627216				BUB1	ZWINT	0.707451	0.807123
	PLCG1	TEC	0.338155	0.0627216
	PLCG2	TEC	0.338155	0.0627216
	PLK4	TEC	0.338155	0.0627216
	PRLR	TEC	0.338155	0.0627216
	PTPRB	TEC	0.338155	0.0627216
	PTPRC	TEC	0.338155	0.0627216
	PTPRE	UBC	0.338155	0.0627216
	PTPRK	TEC	0.338155	0.0627216
	PTPRO	TEC	0.338155	0.0627216
	RAC1	TEC	0.338155	0.0627216
	RHOA	TEC	0.338155	0.0627216
	SHC1	TEC	0.338155	0.0627216
	SOCS1	TEC	0.338155	0.0627216
	TEC	UBC	0.338155	0.0627216
	ACAP3	TAB1	0.345342	0.0645744
	RBX1	TAB1	0.345342	0.0645744
	TAB1	TIRAP	0.345342	0.0645744
	ARAP1	TAB1	0.345342	0.0645744
	BIRC3	TAB1	0.345342	0.0645744
	EGFR	TAB1	0.345342	0.0645744
	FADD	TAB1	0.345342	0.0645744
	GRB2	TAB1	0.345342	0.0645744
	IRAK1	TAB1	0.345342	0.0645744
	LCMT1	TAB1	0.345342	0.0645744
	MDM2	TAB1	0.345342	0.0645744
	NR2C2	TAB1	0.345342	0.0645744
	NXPH3	TAB1	0.345342	0.0645744
	PHC2	TAB1	0.345342	0.0645744
	RIPK2	TAB1	0.345342	0.0645744
	TAB1	TAB2	0.345342	0.0645744
	TAB1	TRAF2	0.345342	0.0645744
	TAB1	TRAF6	0.345342	0.0645744
	TAB1	TRIP6	0.345342	0.0645744
	TAB1	UBC	0.345342	0.0645744
	TAB1	XIAP	0.345342	0.0645744
	ACTB	EIF3I	0.347103	0.0650317
	ARF6	EIF3I	0.347103	0.0650317
	CD81	EIF3I	0.347103	0.0650317
	DDX3X	EIF3I	0.347103	0.0650317
	EIF3A	EIF3I	0.347103	0.0650317
	EIF3B	EIF3I	0.347103	0.0650317
	EIF3D	EIF3I	0.347103	0.0650317
	EIF3E	EIF3I	0.347103	0.0650317
	EIF3H	EIF3I	0.347103	0.0650317
	EIF3I	EIF3K	0.347103	0.0650317
	EIF3I	ESR1	0.347103	0.0650317
	EIF3I	LYAR	0.347103	0.0650317
	EIF3I	OXSR1	0.347103	0.0650317
	EIF3I	PIN1	0.347103	0.0650317
	EIF3I	PPARD	0.347103	0.0650317
	EIF3I	RIOK2	0.347103	0.0650317
	EIF3I	RORA	0.347103	0.0650317
	EIF3I	SNW1	0.347103	0.0650317
	EIF3I	SRRM2	0.347103	0.0650317
	EIF3I	TRAF6	0.347103	0.0650317
	EIF3I	VDR	0.347103	0.0650317
	EIF3I	WIPI2	0.347103	0.0650317
	EIF3I	RAD21	0.348154	0.0653051
	EIF3F	EIF3I	0.348885	0.0654956
	AXIN1	PSMD6	0.349483	0.0656518
	DAD1	MCL1	0.349483	0.0656518
	PML	RBX1	0.349483	0.0656518
	EIF3G	EIF3I	0.354353	0.066928
	BTK	TEC	0.35547	0.067222
	BST2	TAB1	0.358106	0.0679182
	EED	KDM5A	0.358106	0.0679182
	GIT1	TAB1	0.358106	0.0679182
	GIPC1	LRP1	0.364891	0.0697234
	ACTN1	GIPC1	0.364891	0.0697234
	BCR	GIPC1	0.364891	0.0697234
	EMD	SYNE1	0.364891	0.0697234
	FZD3	GIPC1	0.364891	0.0697234
	GIPC1	GSK3B	0.364891	0.0697234
	GIPC1	IGF1R	0.364891	0.0697234
	GIPC1	KIF1B	0.364891	0.0697234
	GIPC1	LRP8	0.364891	0.0697234
	GIPC1	MCM7	0.364891	0.0697234
	GIPC1	MMS19	0.364891	0.0697234
	GIPC1	MYO1C	0.364891	0.0697234
	GIPC1	MYO6	0.364891	0.0697234
	GIPC1	NRP1	0.364891	0.0697234
	GIPC1	NUP93	0.364891	0.0697234
	GIPC1	RGS19	0.364891	0.0697234
	GIPC1	SDC4	0.364891	0.0697234
	GIPC1	TPBG	0.364891	0.0697234
	NCOA4	RNF14	0.364891	0.0697234
	PSMD6	UCHL5	0.364891	0.0697234
	SRF	TEAD1	0.364891	0.0697234
	EIF3I	TGFB1	0.365883	0.0699891
	EIF3I	EIF3M	0.370627	0.0712652
	KIT	TEC	0.374884	0.0724181
	LYN	TEC	0.374884	0.0724181
	GALC	TRAF3	0.381891	0.0743334
	JMJD6	TAF1A	0.381891	0.0743334
	ABI3	KANK2	0.381891	0.0743334
	AEBP2	JMJD6	0.381891	0.0743334
	AES	KANK2	0.381891	0.0743334
	AIFM1	KANK2	0.381891	0.0743334
	ATN1	NELL2	0.381891	0.0743334
	BRD4	JMJD6	0.381891	0.0743334
	CAND1	JMJD6	0.381891	0.0743334
	CCNL1	JMJD6	0.381891	0.0743334
	CCNL2	JMJD6	0.381891	0.0743334
	CDK9	JMJD6	0.381891	0.0743334
	CPSF6	JMJD6	0.381891	0.0743334
	DNM1L	JMJD6	0.381891	0.0743334
	JMJD6	LARP7	0.381891	0.0743334
	JMJD6	LUC7L	0.381891	0.0743334
	JMJD6	NHP2	0.381891	0.0743334
	JMJD6	RBM23	0.381891	0.0743334
	JMJD6	SLU7	0.381891	0.0743334
	JMJD6	STAC3	0.381891	0.0743334
	JMJD6	STAT1	0.381891	0.0743334
	JMJD6	U2AF1	0.381891	0.0743334
	KANK2	MYC	0.381891	0.0743334
	KANK2	NCOA1	0.381891	0.0743334
	KANK2	NCOA2	0.381891	0.0743334
	KANK2	NCOA3	0.381891	0.0743334
	KANK2	UBC	0.381891	0.0743334
	GATA2	TRAF1	0.383784	0.0748544
	ATF2	BATF	0.389196	0.0763528
	BIK	MCL1	0.391071	0.0768749
	COX7C	UBC	0.391071	0.0768749
	BOP1	NOP58	0.396818	0.0784849
	CAND1	NOP58	0.396818	0.0784849
	CDK20	NOP58	0.396818	0.0784849
	DHX15	NOP58	0.396818	0.0784849
	DKC1	NOP58	0.396818	0.0784849
	ESR1	NOP58	0.396818	0.0784849
	GNL3	NOP58	0.396818	0.0784849
	NHP2	NOP58	0.396818	0.0784849
	NOC4L	NOP58	0.396818	0.0784849
	NOLC1	NOP58	0.396818	0.0784849
	NOP2	NOP58	0.396818	0.0784849
	NOP56	NOP58	0.396818	0.0784849
	NOP58	PRPF3	0.396818	0.0784849
	NOP58	PWP2	0.396818	0.0784849
	NOP58	RRS1	0.396818	0.0784849
	NOP58	SUMO1	0.396818	0.0784849
	NOP58	SUMO2	0.396818	0.0784849
	NOP58	SUZ12	0.396818	0.0784849
	NOP58	TAF9	0.396818	0.0784849
	NOP58	TGS1	0.396818	0.0784849
	NOP58	U2AF1	0.396818	0.0784849
	NOP58	UBC	0.396818	0.0784849
	TAF4	TAF5	0.403621	0.0804095
	BBC3	MCL1	0.4058	0.0810305
	MCL1	UHRF2	0.4058	0.0810305
	NIPA2	UBC	0.4058	0.0810305
	BBS1	BBS2	0.421819	0.0856611
	BBS1	EPAS1	0.421819	0.0856611
	BECN1	MCL1	0.421819	0.0856611
	CD209	ICAM3	0.421819	0.0856611
	DHX9	EMD	0.421819	0.0856611
	DHX9	PAN2	0.421819	0.0856611
	E2F3	TFE3	0.421819	0.0856611
	FLNB	LRP1	0.421819	0.0856611
	FRS2	LYN	0.421819	0.0856611
	KIF11	ULK2	0.421819	0.0856611
	PAN2	PAN3	0.421819	0.0856611
	PAN2	PLEC	0.421819	0.0856611
	PTBP2	SNRPA	0.421819	0.0856611
	RAF1	RHEB	0.421819	0.0856611
	RAP1A	RHEB	0.421819	0.0856611
	TAF6	TAF7	0.421819	0.0856611
	AHR	TAF7	0.421819	0.0856611
	ARF6	RCC2	0.421819	0.0856611
	ARMC6	PSMD6	0.421819	0.0856611
	ATF2	JUN	0.421819	0.0856611
	ATG5	RCC2	0.421819	0.0856611
	ATM	RHEB	0.421819	0.0856611
	ATR	RHEB	0.421819	0.0856611
	BAD	MCL1	0.421819	0.0856611
	BAP1	KDM1B	0.421819	0.0856611
	BAX	MCL1	0.421819	0.0856611
	BBS12	BBS2	0.421819	0.0856611
	BBS2	BBS4	0.421819	0.0856611
	BBS2	BBS5	0.421819	0.0856611
	BBS2	BBS7	0.421819	0.0856611
	BBS2	MKKS	0.421819	0.0856611
	BBS2	PSME3	0.421819	0.0856611
	BBS2	TTC8	0.421819	0.0856611
	BBS2	UBC	0.421819	0.0856611
	BCL2	MCL1	0.421819	0.0856611
	BCL6	E2F3	0.421819	0.0856611
	BID	MCL1	0.421819	0.0856611
	BIRC2	DHX9	0.421819	0.0856611
	BMF	MCL1	0.421819	0.0856611
	BOK	MCL1	0.421819	0.0856611
	BRCA2	PSMD6	0.421819	0.0856611
	BRD8	E2F3	0.421819	0.0856611
	CASP4	PSMD6	0.421819	0.0856611
	CBL	STS	0.421819	0.0856611
	CCNB1	E2F3	0.421819	0.0856611
	CCNT1	KDM1B	0.421819	0.0856611
	CCNT1	TAF7	0.421819	0.0856611
	CDK2	RCC2	0.421819	0.0856611
	CDK3	E2F3	0.421819	0.0856611
	CDK7	TAF7	0.421819	0.0856611
	CDK9	TAF7	0.421819	0.0856611
	CHD3	THOC7	0.421819	0.0856611
	CIAO1	DPM1	0.421819	0.0856611
	CKAP4	THOC7	0.421819	0.0856611
	CLN3	DPM1	0.421819	0.0856611
	CREB3	RHEB	0.421819	0.0856611
	CTBP1	KLF4	0.421819	0.0856611
	DCAF7	DDB1	0.421819	0.0856611
	DCAF7	TRAF3	0.421819	0.0856611
	DDB1	EP300	0.421819	0.0856611
	DDB1	LRWD1	0.421819	0.0856611
	DHX9	MVP	0.421819	0.0856611
	DHX9	RAD21	0.421819	0.0856611
	DPM1	DPM2	0.421819	0.0856611
	DPM1	DPM3	0.421819	0.0856611
	DPM1	ILK	0.421819	0.0856611
	DPM1	MYC	0.421819	0.0856611
	E2F3	HCFC1	0.421819	0.0856611
	E2F3	PCNA	0.421819	0.0856611
	E2F3	RBL1	0.421819	0.0856611
	E2F3	RYBP	0.421819	0.0856611
	E2F3	SP1	0.421819	0.0856611
	E2F3	SRA1	0.421819	0.0856611
	E2F3	TEAD3	0.421819	0.0856611
	E2F3	TFDP1	0.421819	0.0856611
	E2F3	TFDP2	0.421819	0.0856611
	E2F3	USF1	0.421819	0.0856611
	E2F3	WNK1	0.421819	0.0856611
	ECSIT	RHEB	0.421819	0.0856611
	EHMT2	KDM1B	0.421819	0.0856611
	ELK1	KLF4	0.421819	0.0856611
	EP300	KLF4	0.421819	0.0856611
	ESR1	PSMD6	0.421819	0.0856611
	FBF1	GCC1	0.421819	0.0856611
	FBF1	IFT20	0.421819	0.0856611
	FBF1	TRAF2	0.421819	0.0856611
	FKBP8	PSMD6	0.421819	0.0856611
	GHR	JAK1	0.421819	0.0856611
	GRB2	RCC2	0.421819	0.0856611
	HDAC1	KLF4	0.421819	0.0856611
	HDAC2	KLF4	0.421819	0.0856611
	HDAC5	KLF4	0.421819	0.0856611
	HDAC5	PSMD6	0.421819	0.0856611
	HDAC7	KLF4	0.421819	0.0856611
	HDGF	RCC2	0.421819	0.0856611
	HSF1	TAF7	0.421819	0.0856611
	HSPB1	PSMD6	0.421819	0.0856611
	HUWE1	MCL1	0.421819	0.0856611
	IDE	ZHX2	0.421819	0.0856611
	KAT5	KLF4	0.421819	0.0856611
	KDM1B	UBC	0.421819	0.0856611
	KDM1B	WDR5	0.421819	0.0856611
	KDM6B	KLF4	0.421819	0.0856611
	KLF4	KLF6	0.421819	0.0856611
	KLF4	PPARG	0.421819	0.0856611
	KLF4	SP1	0.421819	0.0856611
	KLF4	UBC	0.421819	0.0856611
	KLF4	VHL	0.421819	0.0856611
	LAT	ZHX2	0.421819	0.0856611
	LRP1	MMP14	0.421819	0.0856611
	MCL1	PCNA	0.421819	0.0856611
	MCL1	PIN1	0.421819	0.0856611
	MCL1	TNKS2	0.421819	0.0856611
	MCL1	UBC	0.421819	0.0856611
	MCL1	USP9X	0.421819	0.0856611
	MCL1	VDAC1	0.421819	0.0856611
	MCM3	SYF2	0.421819	0.0856611
	MDM2	ZHX2	0.421819	0.0856611
	MED18	THOC7	0.421819	0.0856611
	MED26	TAF4	0.421819	0.0856611
	MED8	THOC7	0.421819	0.0856611
	MTOR	RHEB	0.421819	0.0856611
	NAGPA	ZHX2	0.421819	0.0856611
	NCAM1	RHEB	0.421819	0.0856611
	NFYA	ZHX2	0.421819	0.0856611
	NUBP2	PSMD6	0.421819	0.0856611
	OXSM	UBE2N	0.421819	0.0856611
	PARP2	ZHX2	0.421819	0.0856611
	PDE6D	RHEB	0.421819	0.0856611
	PEX1	PEX6	0.421819	0.0856611
	PGK1	UBA5	0.421819	0.0856611
	PLD1	RHEB	0.421819	0.0856611
	PSMD1	PSMD6	0.421819	0.0856611
	PSMD4	PSMD6	0.421819	0.0856611
	PSMD5	PSMD6	0.421819	0.0856611
	PSMD6	PSMD7	0.421819	0.0856611
	PSMD6	PSMD8	0.421819	0.0856611
	PSMD6	PSME1	0.421819	0.0856611
	PSMD6	PSME2	0.421819	0.0856611
	PSMD6	SGK1	0.421819	0.0856611
	PSMD6	TELO2	0.421819	0.0856611
	PSMD6	TRAF6	0.421819	0.0856611
	PSMD6	TXNL1	0.421819	0.0856611
	PSMD6	UBAC1	0.421819	0.0856611
	PSMD6	UBC	0.421819	0.0856611
	PSMD6	UBE3C	0.421819	0.0856611
	RAB7A	RHEB	0.421819	0.0856611
	RAB9A	RHEB	0.421819	0.0856611
	RAC1	RCC2	0.421819	0.0856611
	RBM6	TAF7	0.421819	0.0856611
	RCC2	SUMO2	0.421819	0.0856611
	RCC2	TNIK	0.421819	0.0856611
	RCC2	UBC	0.421819	0.0856611
	RHEB	RPTOR	0.421819	0.0856611
	RHEB	TRAF2	0.421819	0.0856611
	RHEB	TSC1	0.421819	0.0856611
	RHEB	TSC2	0.421819	0.0856611
	SETD7	TAF7	0.421819	0.0856611
	SMAD4	TCTA	0.421819	0.0856611
	SP1	TAF7	0.421819	0.0856611
	SYF2	UBC	0.421819	0.0856611
	TAF1	TAF7	0.421819	0.0856611
	TAF10	TAF7	0.421819	0.0856611
	TAF11	TAF7	0.421819	0.0856611
	TAF12	TAF7	0.421819	0.0856611
	TAF2	TAF7	0.421819	0.0856611
	TAF7	TAF8	0.421819	0.0856611
	TAF7	TAF9	0.421819	0.0856611
	TAF7	TAF9B	0.421819	0.0856611
	TAF7	TBP	0.421819	0.0856611
	TAF7	TRRAP	0.421819	0.0856611
	TAF7	UBC	0.421819	0.0856611
	TAF7	VDR	0.421819	0.0856611
	THOC1	THOC7	0.421819	0.0856611
	THOC2	THOC7	0.421819	0.0856611
	THOC4	THOC7	0.421819	0.0856611
	THOC5	THOC7	0.421819	0.0856611
	THOC7	UBC	0.421819	0.0856611
	THOC7	UBE3C	0.421819	0.0856611
	THOC7	ZCRB1	0.421819	0.0856611
	TOR1A	TOR1B	0.421819	0.0856611
	UBE2A	UCHL3	0.421819	0.0856611
	ZHX1	ZHX2	0.421819	0.0856611
	PAN2	PAN3	0.437288	0.0902452
	CAPZB	PAN2	0.437288	0.0902452
	EP300	GATA2	0.438237	0.0905302
	GATA2	TAL1	0.442328	0.0917631
	BMI1	GATA2	0.447311	0.0932759
	FHL3	GATA2	0.447311	0.0932759
	GATA2	HDAC1	0.447311	0.0932759
	GATA2	HDAC3	0.447311	0.0932759
	GATA2	HDAC5	0.447311	0.0932759
	GATA2	KAT2A	0.447311	0.0932759
	GATA2	MED1	0.447311	0.0932759
	GATA2	RARA	0.447311	0.0932759
	GATA2	SMAD4	0.447311	0.0932759
	GATA2	SPI1	0.447311	0.0932759
	GATA2	STAT3	0.447311	0.0932759
	AKT1	GATA2	0.45005	0.0941125
	GATA2	RXRA	0.45005	0.0941125
	CEBPA	GATA2	0.452826	0.0949642
	GATA2	HHEX	0.454072	0.0953478
	GATA2	JUN	0.455641	0.0958316
	CD2	CD53	0.458495	0.0967148
	CD4	CD53	0.458495	0.0967148
	CD53	GGT1	0.458495	0.0967148
	ANXA3	UBR1	0.461612	0.0976845
	ARL15	UBR1	0.461612	0.0976845
	ARL3	UBR1	0.461612	0.0976845
	ARL4D	UBR1	0.461612	0.0976845
	BTBD2	UBR1	0.461612	0.0976845
	CBX8	UBR1	0.461612	0.0976845
	CDC42	UBR1	0.461612	0.0976845
	FAF1	UBR1	0.461612	0.0976845
	FAF2	UBR1	0.461612	0.0976845
	FOS	UBR1	0.461612	0.0976845
	NUDT3	UBR1	0.461612	0.0976845
	PTPRS	UBR1	0.461612	0.0976845
	UBE2B	UBR1	0.461612	0.0976845
	UBE2Z	UBR1	0.461612	0.0976845
	UBR1	UBXN1	0.461612	0.0976845
	UBR1	UBXN7	0.461612	0.0976845
	UBR1	XPO1	0.461612	0.0976845
	GATA2	PML	0.462476	0.0979541
	ATF2	PSMD2	0.464322	0.0985312
	BAZ2A	TTF1	0.464322	0.0985312
	KAT2B	TTF1	0.464322	0.0985312
	SMAD1	TTF1	0.464322	0.0985312
	SMAD7	TTF1	0.464322	0.0985312
	BASP1	PAN2	0.4667	0.099277
	CSF1R	PAN2	0.4667	0.099277
	PAN2	RAD50	0.4667	0.099277
	CBWD2	PAN2	0.4667	0.099277
	CD59	PAN2	0.4667	0.099277
	CYTSB	PAN2	0.4667	0.099277
	EIF3H	PAN2	0.4667	0.099277
	LRCH3	PAN2	0.4667	0.099277
	MAP1B	PAN2	0.4667	0.099277
	MYH14	PAN2	0.4667	0.099277
	MYL6	PAN2	0.4667	0.099277
	MYO1B	PAN2	0.4667	0.099277
	MYO5B	PAN2	0.4667	0.099277
	NUP93	PAN2	0.4667	0.099277
	PAN2	PTMA	0.4667	0.099277
	PAN2	RBBP4	0.4667	0.099277
	PAN2	RBM10	0.4667	0.099277
	PAN2	SF3A2	0.4667	0.099277
	PAN2	SFPQ	0.4667	0.099277
	PAN2	SRP14	0.4667	0.099277
	PAN2	UBC	0.4667	0.099277
	MFAP1	VPS52	0.467991	0.0996833
	NOP2	VPS52	0.467991	0.0996833
	STX6	VPS52	0.467991	0.0996833
	TRAF6	VPS52	0.467991	0.0996833
	TSSK3	VPS52	0.467991	0.0996833
	TXLNA	VPS52	0.467991	0.0996833
	UBC	UBR1	0.467991	0.0996833
	VPS28	VPS52	0.467991	0.0996833
	VPS52	VPS54	0.467991	0.0996833
	EIF3G	FLNB	0.472353	0.101062
	FLNB	WAC	0.472353	0.101062
	RAD21	SMC4	0.472353	0.101062
	ABCA5	NR4A1	0.472353	0.101062
	ACY1	TTC1	0.472353	0.101062
	ARRB1	KIF3A	0.472353	0.101062
	BCL6	HSF4	0.472353	0.101062
	DISC1	KIF3A	0.472353	0.101062
	EIF3J	TTC1	0.472353	0.101062
	GFPT1	TTC1	0.472353	0.101062
	GNA15	TTC1	0.472353	0.101062
	GNAQ	TTC1	0.472353	0.101062
	GRB2	KIF3A	0.472353	0.101062
	KIF3A	KIF3B	0.472353	0.101062
	KIF3A	KIF3C	0.472353	0.101062
	KIF3A	NEK1	0.472353	0.101062
	KIF3A	TULP3	0.472353	0.101062
	KIF3A	UBC	0.472353	0.101062
	NCBP1	TTC1	0.472353	0.101062
	PEX14	TTC1	0.472353	0.101062
	PPM1G	TTC1	0.472353	0.101062
	SNF8	TTC1	0.472353	0.101062
	SRXN1	TTC1	0.472353	0.101062
	THOC2	TTC1	0.472353	0.101062
	TTC1	UBXN1	0.472353	0.101062
	TTC1	UCHL3	0.472353	0.101062
	EIF1B	EIF3I	0.476484	0.102377
	UBR1	UCHL3	0.476985	0.102537
	DHX9	PAN2	0.484126	0.104831
	EED	NOP58	0.484126	0.104831
	G2E3	WDR6	0.484126	0.104831
	CD209	ICAM3	0.493391	0.107848
	ARL6	BBS1	0.503057	0.111044
	BBS1	BBS2	0.503057	0.111044
	EIF3G	EIF3M	0.503057	0.111044
	EMD	LMNA	0.503057	0.111044
	EMD	SUN2	0.503057	0.111044
	ZHX2	ZHX3	0.503057	0.111044
	ABT1	EMD	0.503057	0.111044
	ACTB	EMD	0.503057	0.111044
	AEN	EMD	0.503057	0.111044
	AKTIP	EXOC7	0.503057	0.111044
	BBS1	BBS4	0.503057	0.111044
	BBS1	BBS5	0.503057	0.111044
	BBS1	BBS7	0.503057	0.111044
	BBS1	DCTN1	0.503057	0.111044
	BBS1	EIF3A	0.503057	0.111044
	BBS1	PARK7	0.503057	0.111044
	BBS1	PCM1	0.503057	0.111044
	BBS1	TTC8	0.503057	0.111044
	BBS1	UBC	0.503057	0.111044
	BBS7	EXOC7	0.503057	0.111044
	BEND7	EMD	0.503057	0.111044
	CDC37	EMD	0.503057	0.111044
	CDC42	MYO9A	0.503057	0.111044
	CDC5L	EXOC7	0.503057	0.111044
	CEP70	EMD	0.503057	0.111044
	CLN3	EMD	0.503057	0.111044
	CREB3	EMD	0.503057	0.111044
	CUL5	FEM1B	0.503057	0.111044
	DISC1	EXOC7	0.503057	0.111044
	DLG3	EXOC7	0.503057	0.111044
	DPY30	EMD	0.503057	0.111044
	EMD	G3BP1	0.503057	0.111044
	EMD	GMCL1	0.503057	0.111044
	EMD	HDAC1	0.503057	0.111044
	EMD	HDAC3	0.503057	0.111044
	EMD	HDAC5	0.503057	0.111044
	EMD	HDGF	0.503057	0.111044
	EMD	LRRK2	0.503057	0.111044
	EMD	MCM2	0.503057	0.111044
	EMD	MED4	0.503057	0.111044
	EMD	MYH9	0.503057	0.111044
	EMD	MYO1C	0.503057	0.111044
	EMD	MYO1E	0.503057	0.111044
	EMD	PSME1	0.503057	0.111044
	EMD	RBL1	0.503057	0.111044
	EMD	SUZ12	0.503057	0.111044
	EMD	TBL1X	0.503057	0.111044
	EP300	PAX8	0.503057	0.111044
	EP300	PRKDC	0.503057	0.111044
	EXOC2	EXOC7	0.503057	0.111044
	EXOC4	EXOC7	0.503057	0.111044
	EXOC7	IFT20	0.503057	0.111044
	EXOC7	RALA	0.503057	0.111044
	EXOC7	RHOQ	0.503057	0.111044
	HECW2	PKN3	0.503057	0.111044
	JUN	MAZ	0.503057	0.111044
	PKN3	PLD1	0.503057	0.111044
	PRKDC	SRF	0.503057	0.111044
	THOC3	THOC6	0.509184	0.113096
	GBP2	GNS	0.512817	0.114322
	CDK2	SMC4	0.514299	0.114825
	ILK	SMC4	0.514299	0.114825
	MYC	SMC4	0.514299	0.114825
	PMM1	RAB6A	0.514299	0.114825
	SMC2	SMC4	0.514299	0.114825
	SMC4	SMYD2	0.514299	0.114825
	SMC4	STX1A	0.514299	0.114825
	SMC4	TPR	0.514299	0.114825
	KLC3	WAC	0.517613	0.115952
	LNX1	WAC	0.517613	0.115952
	UBC	WAC	0.517613	0.115952
	CDK12	CDK9	0.521746	0.117367
	CDK12	PIN1	0.521746	0.117367
	EIF3K	EIF3M	0.521746	0.117367
	PMS2	PRKDC	0.523699	0.11804
	UBE2A	UBR1	0.527845	0.119473
	FUS	PTBP2	0.528205	0.119598
	MATR3	PTBP2	0.528205	0.119598
	PTBP2	PUF60	0.528205	0.119598
	PTBP2	QKI	0.528205	0.119598
	PTBP2	RBM10	0.528205	0.119598
	PTBP2	RBM4	0.528205	0.119598
	PTBP2	TOM1	0.528205	0.119598
	PTBP2	SNRPA	0.533129	0.121315
	EIF3A	EIF3M	0.535228	0.122051
	EIF3B	EIF3M	0.535228	0.122051
	EIF3D	EIF3M	0.535228	0.122051
	EIF3E	EIF3M	0.535228	0.122051
	EIF3F	EIF3M	0.535228	0.122051
	EIF3H	EIF3M	0.535228	0.122051
	EIF3J	EIF3M	0.535228	0.122051
	EIF3L	EIF3M	0.535228	0.122051
	EIF3M	HSPB1	0.535228	0.122051
	EIF3M	SRPK1	0.535228	0.122051
	DDX18	EED	0.53853	0.123214
	EIF3G	EIF3M	0.53853	0.123214
	PSMD2	PSMD6	0.53853	0.123214
	BOP1	DDX18	0.53853	0.123214
	CAND1	DDX18	0.53853	0.123214
	CEBPZ	LZTR1	0.53853	0.123214
	CUL1	DDX18	0.53853	0.123214
	CUL1	PLOD1	0.53853	0.123214
	CUL4B	PLOD1	0.53853	0.123214
	DDX18	DKC1	0.53853	0.123214
	DDX18	ESR1	0.53853	0.123214
	DDX18	INADL	0.53853	0.123214
	DDX18	NHP2	0.53853	0.123214
	DDX18	NOP2	0.53853	0.123214
	DDX18	PINX1	0.53853	0.123214
	DDX18	RPF1	0.53853	0.123214
	DDX18	SUZ12	0.53853	0.123214
	DDX18	UBC	0.53853	0.123214
	DDX18	VCAM1	0.53853	0.123214
	EHMT1	LZTR1	0.53853	0.123214
	GRHL2	LMO4	0.53853	0.123214
	GRHL2	RARA	0.53853	0.123214
	HCLS1	LZTR1	0.53853	0.123214
	KDM2B	LZTR1	0.53853	0.123214
	LZTR1	MCM3	0.53853	0.123214
	LZTR1	MED16	0.53853	0.123214
	LZTR1	PARP1	0.53853	0.123214
	LZTR1	STAT1	0.53853	0.123214
	LZTR1	TCF19	0.53853	0.123214
	LZTR1	ZBTB1	0.53853	0.123214
	NR4A1	PML	0.53853	0.123214
	PLOD1	SUMO2	0.53853	0.123214
	PLOD1	TERF2	0.53853	0.123214
	PLOD1	UBC	0.53853	0.123214
	PMM1	UBC	0.53853	0.123214
	GOPC	SSR3	0.541181	0.124153
	SMS	SSR3	0.541181	0.124153
	AURKA	TACC1	0.541433	0.124242
	AURKB	TACC1	0.541433	0.124242
	CKAP5	TACC1	0.541433	0.124242
	ITSN2	TACC1	0.541433	0.124242
	KAT2A	TACC1	0.541433	0.124242
	LSM7	TACC1	0.541433	0.124242
	TACC1	TDRD7	0.541433	0.124242
	TACC1	UBC	0.545851	0.125816
	DHX9	EMD	0.558419	0.130358
	PAN2	PLEC	0.558419	0.130358
	EIF3G	EIF3K	0.558419	0.130358
	PRPS1	PRPS2	0.558419	0.130358
	SRPK2	TRA2B	0.558419	0.130358
	ETV4	SRF	0.560914	0.131271
	MVP	PDPK1	0.56541	0.132927
	EPAS1	MITF	0.565827	0.133081
	EP300	GATA2	0.571142	0.135056
	CDK2	TKT	0.571142	0.135056
	IGBP1	TKT	0.571142	0.135056
	NXT2	SRPK2	0.571142	0.135056
	TKT	UBC	0.571142	0.135056
	LSM10	LSM11	0.575525	0.136698
	LSM11	UBC	0.575525	0.136698
	EP300	EPAS1	0.578035	0.137644
	BBS2	EPAS1	0.583753	0.139815
	EPAS1	ETS1	0.583753	0.139815
	EPAS1	MAX	0.583753	0.139815
	AP3M1	AP3S1	0.58648	0.140857
	HDGF	THOC3	0.58648	0.140857
	MLKL	THOC3	0.58648	0.140857
	NCBP1	THOC3	0.58648	0.140857
	THOC1	THOC3	0.58648	0.140857
	THOC3	THOC4	0.58648	0.140857
	THOC3	THOC5	0.58648	0.140857
	THOC3	UBC	0.58648	0.140857
	THOC3	ZCRB1	0.58648	0.140857
	APC	EPAS1	0.588106	0.141482
	ARNT	EPAS1	0.588106	0.141482
	ARNT2	EPAS1	0.588106	0.141482
	BBS4	EPAS1	0.588106	0.141482
	CNOT7	EPAS1	0.588106	0.141482
	EGLN1	EPAS1	0.588106	0.141482
	EGLN2	EPAS1	0.588106	0.141482
	EGLN3	EPAS1	0.588106	0.141482
	EIF3E	EPAS1	0.588106	0.141482
	EPAS1	HIF1A	0.588106	0.141482
	EPAS1	JUN	0.588106	0.141482
	EPAS1	MCM3	0.588106	0.141482
	EPAS1	MED1	0.588106	0.141482
	EPAS1	MEF2C	0.588106	0.141482
	EPAS1	SIN3A	0.588106	0.141482
	EPAS1	SMAD3	0.588106	0.141482
	EPAS1	SP1	0.588106	0.141482
	EPAS1	SUMO1	0.588106	0.141482
	EPAS1	VHL	0.588106	0.141482
	THOC2	THOC3	0.5909	0.142558
	BBS1	EPAS1	0.591458	0.142774
	EPAS1	UBC	0.59194	0.142961
	BATF	JUNB	0.593138	0.143425
	MPDZ	SSR3	0.593534	0.143578
	THOC3	THOC7	0.595393	0.144301
	FOXP3	REL	0.596838	0.144865
	HINT3	UBC	0.596838	0.144865
	ATF2	PGAM1	0.597067	0.144954
	ATG4B	ULK1	0.597382	0.145077
	CDC37	ULK1	0.597382	0.145077
	MTOR	ULK1	0.597382	0.145077
	RPTOR	ULK1	0.597382	0.145077
	TRAF6	ULK1	0.597382	0.145077
	BATF	DDIT3	0.600604	0.14634
	ATF4	BATF	0.600604	0.14634
	BATF	BATF3	0.600604	0.14634
	BATF	CEBPG	0.600604	0.14634
	BATF	DBP	0.600604	0.14634
	BATF	FOS	0.600604	0.14634
	BATF	JUN	0.600604	0.14634
	BATF	JUND	0.600604	0.14634
	BATF	KDM1A	0.600604	0.14634
	BATF	NFIL3	0.600604	0.14634
	DVL3	KLF3	0.606095	0.148508
	FOXP3	GATA3	0.606647	0.148728
	FOXP3	HDAC1	0.606647	0.148728
	FOXP3	HDAC2	0.606647	0.148728
	FOXP3	HDAC4	0.606647	0.148728
	FOXP3	HDAC7	0.606647	0.148728
	FOXP3	HDAC9	0.606647	0.148728
	FOXP3	IKZF4	0.606647	0.148728
	FOXP3	KAT5	0.606647	0.148728
	FOXP3	NFAT5	0.606647	0.148728
	FOXP3	RUNX1	0.606647	0.148728
	CSF3R	WSB2	0.606955	0.14885
	EZH2	WSB2	0.606955	0.14885
	RPN1	WSB2	0.606955	0.14885
	BATF	CEBPA	0.60745	0.149047
	FOXP3	UBC	0.610987	0.150459
	EIF1B	EIF3I	0.612602	0.151107
	BECN1	ULK1	0.615949	0.152455
	ATF2	FOSL1	0.621112	0.15455
	THOC3	TTC1	0.623897	0.15569
	ACAP3	TAB1	0.629031	0.157804
	APBA2	LRP1	0.629031	0.157804
	APBA2	LRP1	0.629031	0.157804
	ASF1A	CDAN1	0.629031	0.157804
	AURKA	HMMR	0.629031	0.157804
	AURKA	PLK3	0.629031	0.157804
	AURKA	PLK3	0.629031	0.157804
	AURKA	TACC1	0.629031	0.157804
	AXIN1	PSMD6	0.629031	0.157804
	BATF	DDIT3	0.629031	0.157804
	BBC3	MCL1	0.629031	0.157804
	BBS1	EPAS1	0.629031	0.157804
	BFAR	UBE2K	0.629031	0.157804
	BTAF1	PIAS4	0.629031	0.157804
	BUB1	BUB3	0.629031	0.157804
	BUB3	CDC26	0.629031	0.157804
	BUB3	CDC26	0.629031	0.157804
	CSF1R	LYN	0.629031	0.157804
	CSF1R	LYN	0.629031	0.157804
	CSF1R	PAN2	0.629031	0.157804
	CTCF	RXRA	0.629031	0.157804
	DAB2	LRP1	0.629031	0.157804
	DAB2	LRP1	0.629031	0.157804
	DDB1	DDB2	0.629031	0.157804
	DDB1	DDB2	0.629031	0.157804
	DDB1	EED	0.629031	0.157804
	DDB1	RBX1	0.629031	0.157804
	DDB2	RBX1	0.629031	0.157804
	DDIT3	JUNB	0.629031	0.157804
	DVL2	LYN	0.629031	0.157804
	EED	RAD50	0.629031	0.157804
	EIF1B	EIF3G	0.629031	0.157804
	EMD	SUN2	0.629031	0.157804
	EP300	TACC2	0.629031	0.157804
	FRS2	NTRK2	0.629031	0.157804
	FRS2	PTPRF	0.629031	0.157804
	FRS2	SOS1	0.629031	0.157804
	GIPC1	LRP1	0.629031	0.157804
	IL21R	JAK1	0.629031	0.157804
	JAK1	RAF1	0.629031	0.157804
	JMJD6	TAF1A	0.629031	0.157804
	KANK2	NOS3	0.629031	0.157804
	MCL1	UHRF2	0.629031	0.157804
	MX2	TBP	0.629031	0.157804
	NRF1	PARK7	0.629031	0.157804
	PAN2	RAD50	0.629031	0.157804
	RAD21	SMC4	0.629031	0.157804
	RAF1	RHEB	0.629031	0.157804
	RAF1	WDR83	0.629031	0.157804
	REL	TBK1	0.629031	0.157804
	RGS14	RND2	0.629031	0.157804
	RPN2	UBL4A	0.629031	0.157804
	TAB1	TIRAP	0.629031	0.157804
	TAF6	TBP	0.629031	0.157804
	ABI1	LYN	0.629031	0.157804
	ABL1	DDB1	0.629031	0.157804
	ABL1	DDB2	0.629031	0.157804
	ABL1	RFX1	0.629031	0.157804
	ABL1	TUB	0.629031	0.157804
	ACE	COMT	0.629031	0.157804
	ACE	MYH9	0.629031	0.157804
	ACTB	LYN	0.629031	0.157804
	ACTN1	PIAS4	0.629031	0.157804
	ACVR1	RXRA	0.629031	0.157804
	ADA	DPP4	0.629031	0.157804
	ADCY6	RAF1	0.629031	0.157804
	ADCY9	UBC	0.629031	0.157804
	ADRM1	BUB3	0.629031	0.157804
	AES	EAF1	0.629031	0.157804
	AFF1	EAF1	0.629031	0.157804
	AFF4	EAF1	0.629031	0.157804
	AHR	DDB1	0.629031	0.157804
	AIFM1	EIF3G	0.629031	0.157804
	AKT1	AURKA	0.629031	0.157804
	AKT1	BAD	0.629031	0.157804
	AKT1	IGSF8	0.629031	0.157804
	AKT1	PDPK1	0.629031	0.157804
	AKT1	RAF1	0.629031	0.157804
	ALDOA	PIAS4	0.629031	0.157804
	ALDOC	NUP98	0.629031	0.157804
	ALDOC	PLD2	0.629031	0.157804
	ALDOC	UBC	0.629031	0.157804
	ANXA1	ANXA4	0.629031	0.157804
	ANXA4	ANXA7	0.629031	0.157804
	ANXA4	NFKB1	0.629031	0.157804
	ANXA6	CD4	0.629031	0.157804
	ANXA6	RASA1	0.629031	0.157804
	ANXA6	THOP1	0.629031	0.157804
	AP4E1	AP4M1	0.629031	0.157804
	APBA2	GRASP	0.629031	0.157804
	APBB1	LRP1	0.629031	0.157804
	APC	BUB3	0.629031	0.157804
	APC	COG4	0.629031	0.157804
	APEX1	SRPK2	0.629031	0.157804
	APLP1	STX5	0.629031	0.157804
	APOE	LRP1	0.629031	0.157804
	ARAF	RAF1	0.629031	0.157804
	ARAF	TIRAP	0.629031	0.157804
	ARF6	EIF3G	0.629031	0.157804
	ARRB2	RAF1	0.629031	0.157804
	ASF1B	CDAN1	0.629031	0.157804
	ATF3	DDIT3	0.629031	0.157804
	ATF4	DDIT3	0.629031	0.157804
	ATG2A	ATG2B	0.629031	0.157804
	ATM	RAD50	0.629031	0.157804
	ATRX	RAD50	0.629031	0.157804
	AUP1	UBL4A	0.629031	0.157804
	AURKA	BIRC5	0.629031	0.157804
	AURKA	BRCA1	0.629031	0.157804
	AURKA	CBX3	0.629031	0.157804
	AURKA	CDC20	0.629031	0.157804
	AURKA	CHFR	0.629031	0.157804
	AURKA	CKAP5	0.629031	0.157804
	AURKA	EGFR	0.629031	0.157804
	AURKA	FBXW7	0.629031	0.157804
	AURKA	GSK3B	0.629031	0.157804
	AURKA	HDAC6	0.629031	0.157804
	AURKA	KIF2C	0.629031	0.157804
	AURKA	LATS2	0.629031	0.157804
	AURKA	LEF1	0.629031	0.157804
	AURKA	MAPK3	0.629031	0.157804
	AURKA	MDM2	0.629031	0.157804
	AURKA	NDC80	0.629031	0.157804
	AURKA	NIN	0.629031	0.157804
	AURKA	NUF2	0.629031	0.157804
	AURKA	PLK1	0.629031	0.157804
	AURKA	PML	0.629031	0.157804
	AURKA	PTTG1	0.629031	0.157804
	AURKA	PUM2	0.629031	0.157804
	AURKA	RASA1	0.629031	0.157804
	AURKA	SRPK2	0.629031	0.157804
	AURKA	TACC3	0.629031	0.157804
	AURKA	TLK1	0.629031	0.157804
	AURKA	TLK2	0.629031	0.157804
	AURKA	TPX2	0.629031	0.157804
	AURKA	UBC	0.629031	0.157804
	AURKA	UBE2N	0.629031	0.157804
	BACE1	LRP1	0.629031	0.157804
	BACH1	DDIT3	0.629031	0.157804
	BAD	RAF1	0.629031	0.157804
	BAG1	RAF1	0.629031	0.157804
	BBS1	BBS12	0.629031	0.157804
	BCAR1	LYN	0.629031	0.157804
	BCL10	DPP4	0.629031	0.157804
	BCL2	BNIP2	0.629031	0.157804
	BCL2	RAF1	0.629031	0.157804
	BCL7C	SNW1	0.629031	0.157804
	BEND7	EAF1	0.629031	0.157804
	BET1	STX5	0.629031	0.157804
	BET1L	STX5	0.629031	0.157804
	BIRC2	NOD2	0.629031	0.157804
	BIRC2	RAF1	0.629031	0.157804
	BIRC3	NOD2	0.629031	0.157804
	BIRC3	RAF1	0.629031	0.157804
	BLM	RAD50	0.629031	0.157804
	BLM	TOP3A	0.629031	0.157804
	BLNK	LYN	0.629031	0.157804
	BNIP2	BNIPL	0.629031	0.157804
	BNIP2	CDC42	0.629031	0.157804
	BNIP2	CREB3	0.629031	0.157804
	BNIP2	FGFR1	0.629031	0.157804
	BNIP2	FRK	0.629031	0.157804
	BRAF	RAF1	0.629031	0.157804
	BRAP	RAF1	0.629031	0.157804
	BRCA1	ELK4	0.629031	0.157804
	BRCA1	PIAS4	0.629031	0.157804
	BRCA1	RAD50	0.629031	0.157804
	BRD8	RXRA	0.629031	0.157804
	BRPF1	ING5	0.629031	0.157804
	BRPF1	UBC	0.629031	0.157804
	BRPF1	ZFHX4	0.629031	0.157804
	BTK	LYN	0.629031	0.157804
	BTK	TIRAP	0.629031	0.157804
	BUB1B	BUB3	0.629031	0.157804
	BUB1B	CDC26	0.629031	0.157804
	BUB1B	PLK3	0.629031	0.157804
	BUB3	CDC16	0.629031	0.157804
	BUB3	CDC20	0.629031	0.157804
	BUB3	CDC23	0.629031	0.157804
	BUB3	CDC27	0.629031	0.157804
	BUB3	CPNE1	0.629031	0.157804
	BUB3	EXOC3	0.629031	0.157804
	BUB3	HDAC1	0.629031	0.157804
	BUB3	HDAC2	0.629031	0.157804
	BUB3	HDGF	0.629031	0.157804
	BUB3	NKAP	0.629031	0.157804
	BUB3	PARP1	0.629031	0.157804
	BUB3	SF3A2	0.629031	0.157804
	BUB3	SMAD2	0.629031	0.157804
	BUB3	SMAD3	0.629031	0.157804
	BUB3	SNW1	0.629031	0.157804
	BUB3	SUGT1	0.629031	0.157804
	BUB3	SUMO1	0.629031	0.157804
	BUB3	TNIK	0.629031	0.157804
	BUB3	TRAF6	0.629031	0.157804
	BUB3	UBA1	0.629031	0.157804
	BUB3	UBC	0.629031	0.157804
	BUB3	VCAM1	0.629031	0.157804
	BUD13	RBMX2	0.629031	0.157804
	C1QBP	UBL4A	0.629031	0.157804
	C1R	C1S	0.629031	0.157804
	CALR	LRP1	0.629031	0.157804
	CAND1	DDB1	0.629031	0.157804
	CAND1	XRN2	0.629031	0.157804
	CASP1	NOD2	0.629031	0.157804
	CASP1	TIRAP	0.629031	0.157804
	CASP2	RXRA	0.629031	0.157804
	CASP3	LYN	0.629031	0.157804
	CASP4	NOD2	0.629031	0.157804
	CASP7	LYN	0.629031	0.157804
	CASP9	LYN	0.629031	0.157804
	CBL	CSF1R	0.629031	0.157804
	CBL	LYN	0.629031	0.157804
	CBLB	LYN	0.629031	0.157804
	CCAR1	UBL4A	0.629031	0.157804
	CCL22	DPP4	0.629031	0.157804
	CCNB1	CDC26	0.629031	0.157804
	CCND1	TSTD2	0.629031	0.157804
	CD22	LYN	0.629031	0.157804
	CD24	LYN	0.629031	0.157804
	CD36	LYN	0.629031	0.157804
	CD4	DPP4	0.629031	0.157804
	CD4	UBL7	0.629031	0.157804
	CD72	LYN	0.629031	0.157804
	CD79B	LYN	0.629031	0.157804
	CD81	IGSF8	0.629031	0.157804
	CD82	IGSF8	0.629031	0.157804
	CD82	LRP1	0.629031	0.157804
	CD9	IGSF8	0.629031	0.157804
	CDAN1	PCNA	0.629031	0.157804
	CDC16	CDC26	0.629031	0.157804
	CDC20	CDC26	0.629031	0.157804
	CDC23	CDC26	0.629031	0.157804
	CDC26	CDC27	0.629031	0.157804
	CDC26	MYC	0.629031	0.157804
	CDC26	NEK2	0.629031	0.157804
	CDC26	PTTG1	0.629031	0.157804
	CDC26	UBC	0.629031	0.157804
	CDC26	UBE2C	0.629031	0.157804
	CDC5L	DDB1	0.629031	0.157804
	CDC5L	EIF3G	0.629031	0.157804
	CDC5L	RAD50	0.629031	0.157804
	CDIPT	UBL4A	0.629031	0.157804
	CDK1	LYN	0.629031	0.157804
	CDK18	UBL4A	0.629031	0.157804
	CDK2	LYN	0.629031	0.157804
	CDK20	RAF1	0.629031	0.157804
	CDK4	LYN	0.629031	0.157804
	CDK6	DDIT3	0.629031	0.157804
	CDK9	FGFR4	0.629031	0.157804
	CDK9	UBL4A	0.629031	0.157804
	CDT1	DDB1	0.629031	0.157804
	CDT1	DDB2	0.629031	0.157804
	CDV3	UBL4A	0.629031	0.157804
	CEBPB	DDIT3	0.629031	0.157804
	CEBPD	PIAS4	0.629031	0.157804
	CEBPG	DDIT3	0.629031	0.157804
	CENPF	NDE1	0.629031	0.157804
	CENPV	LYN	0.629031	0.157804
	CEP63	HAUS1	0.629031	0.157804
	CEP70	HAUS1	0.629031	0.157804
	CFLAR	RAF1	0.629031	0.157804
	CFLAR	SUN2	0.629031	0.157804
	CHD3	PIAS4	0.629031	0.157804
	CHD9	RXRA	0.629031	0.157804
	CIB1	PLK3	0.629031	0.157804
	CLK1	PIAS4	0.629031	0.157804
	CLOCK	RXRA	0.629031	0.157804
	CNOT1	RXRA	0.629031	0.157804
	COG1	COG4	0.629031	0.157804
	COG2	COG4	0.629031	0.157804
	COG3	COG4	0.629031	0.157804
	COG4	COG5	0.629031	0.157804
	COG4	COG7	0.629031	0.157804
	COG4	COG8	0.629031	0.157804
	COG4	SEPT2	0.629031	0.157804
	COG4	UBC	0.629031	0.157804
	COMT	XRN2	0.629031	0.157804
	CP110	LYN	0.629031	0.157804
	CPT1A	LYN	0.629031	0.157804
	CRBN	DDB1	0.629031	0.157804
	CREB3	DDIT3	0.629031	0.157804
	CRKL	LYN	0.629031	0.157804
	CSF1	CSF1R	0.629031	0.157804
	CSF1R	FYN	0.629031	0.157804
	CSF1R	GRAP2	0.629031	0.157804
	CSF1R	GRB2	0.629031	0.157804
	CSF1R	IL34	0.629031	0.157804
	CSF1R	PLCG2	0.629031	0.157804
	CSF1R	RASA1	0.629031	0.157804
	CSF1R	SHC1	0.629031	0.157804
	CSF1R	SOCS1	0.629031	0.157804
	CSF1R	SOCS3	0.629031	0.157804
	CSF1R	SOS1	0.629031	0.157804
	CSF1R	SRC	0.629031	0.157804
	CSF1R	UBC	0.629031	0.157804
	CSF3R	LYN	0.629031	0.157804
	CSK	LYN	0.629031	0.157804
	CTGF	LRP1	0.629031	0.157804
	CUBN	LRP1	0.629031	0.157804
	CUL1	DDB1	0.629031	0.157804
	CUL1	UHRF1	0.629031	0.157804
	CUL1	XRN2	0.629031	0.157804
	CUL2	FEM1B	0.629031	0.157804
	CUL3	DDB1	0.629031	0.157804
	CUL3	DDIT3	0.629031	0.157804
	CUL4A	DDB1	0.629031	0.157804
	CUL4A	DDB2	0.629031	0.157804
	CUL4B	DDB1	0.629031	0.157804
	CUL4B	DDB2	0.629031	0.157804
	CXCR4	DPP4	0.629031	0.157804
	DAB2	DVL2	0.629031	0.157804
	DAPP1	LYN	0.629031	0.157804
	DBP	DDIT3	0.629031	0.157804
	DCAF4	DDB1	0.629031	0.157804
	DCAF5	DDB1	0.629031	0.157804
	DCAF6	DDB1	0.629031	0.157804
	DCAF8	DDB1	0.629031	0.157804
	DCTN2	HAUS1	0.629031	0.157804
	DDA1	DDB1	0.629031	0.157804
	DDB1	DDIT4	0.629031	0.157804
	DDB1	DET1	0.629031	0.157804
	DDB1	DTL	0.629031	0.157804
	DDB1	DYRK2	0.629031	0.157804
	DDB1	ERCC6	0.629031	0.157804
	DDB1	ERCC8	0.629031	0.157804
	DDB1	FBXW5	0.629031	0.157804
	DDB1	FBXW8	0.629031	0.157804
	DDB1	GRK5	0.629031	0.157804
	DDB1	ILK	0.629031	0.157804
	DDB1	INO80	0.629031	0.157804
	DDB1	INVS	0.629031	0.157804
	DDB1	KAT2A	0.629031	0.157804
	DDB1	LMO4	0.629031	0.157804
	DDB1	MCM10	0.629031	0.157804
	DDB1	MDM2	0.629031	0.157804
	DDB1	MEF2A	0.629031	0.157804
	DDB1	MTOR	0.629031	0.157804
	DDB1	MYC	0.629031	0.157804
	DDB1	NEDD8	0.629031	0.157804
	DDB1	PCNA	0.629031	0.157804
	DDB1	PIN1	0.629031	0.157804
	DDB1	PMS2	0.629031	0.157804
	DDB1	PUF60	0.629031	0.157804
	DDB1	RAD21	0.629031	0.157804
	DDB1	RBBP7	0.629031	0.157804
	DDB1	RFWD2	0.629031	0.157804
	DDB1	RORA	0.629031	0.157804
	DDB1	SALL2	0.629031	0.157804
	DDB1	SKP2	0.629031	0.157804
	DDB1	SNW1	0.629031	0.157804
	DDB1	STAT1	0.629031	0.157804
	DDB1	TERF1	0.629031	0.157804
	DDB1	UBA1	0.629031	0.157804
	DDB1	UBC	0.629031	0.157804
	DDB1	UBR5	0.629031	0.157804
	DDB1	UCHL1	0.629031	0.157804
	DDB1	VAMP3	0.629031	0.157804
	DDB1	VASP	0.629031	0.157804
	DDB1	WDTC1	0.629031	0.157804
	DDB1	VPRBP	0.629031	0.157804
	DDB1	XPA	0.629031	0.157804
	DDB1	XPC	0.629031	0.157804
	DDB2	E2F1	0.629031	0.157804
	DDB2	EP300	0.629031	0.157804
	DDB2	ERCC8	0.629031	0.157804
	DDB2	HDAC1	0.629031	0.157804
	DDB2	RFWD2	0.629031	0.157804
	DDB2	SUMO2	0.629031	0.157804
	DDB2	UBC	0.629031	0.157804
	DDB2	XPA	0.629031	0.157804
	DDB2	XPC	0.629031	0.157804
	DDB2	XRCC6	0.629031	0.157804
	DDIT3	EP300	0.629031	0.157804
	DDIT3	FOS	0.629031	0.157804
	DDIT3	HDAC1	0.629031	0.157804
	DDIT3	JUN	0.629031	0.157804
	DDIT3	JUND	0.629031	0.157804
	DDIT3	NFIL3	0.629031	0.157804
	DDIT3	SPOP	0.629031	0.157804
	DDIT3	TRIB3	0.629031	0.157804
	DDX1	RAD50	0.629031	0.157804
	DDX20	UBL4A	0.629031	0.157804
	DDX21	LYN	0.629031	0.157804
	DDX3X	EIF3G	0.629031	0.157804
	DHX15	IGSF8	0.629031	0.157804
	DHX8	RBMX2	0.629031	0.157804
	DHX8	XRN2	0.629031	0.157804
	DHX9	PRKDC	0.629031	0.157804
	DLG4	LRP1	0.629031	0.157804
	DLG4	LYN	0.629031	0.157804
	DMPK	RAF1	0.629031	0.157804
	DNA2	LYN	0.629031	0.157804
	DNMT1	UHRF1	0.629031	0.157804
	DOCK8	LYN	0.629031	0.157804
	DOK1	LYN	0.629031	0.157804
	DOK2	LYN	0.629031	0.157804
	DOK3	LYN	0.629031	0.157804
	DPP4	PTPRC	0.629031	0.157804
	DTL	LYN	0.629031	0.157804
	EAF1	ELL	0.629031	0.157804
	EAF1	ELL2	0.629031	0.157804
	EAF1	PSME3	0.629031	0.157804
	EAF1	TFPT	0.629031	0.157804
	EDF1	JUN	0.629031	0.157804
	EDF1	RXRA	0.629031	0.157804
	EGFR	LYN	0.629031	0.157804
	EHMT2	UHRF1	0.629031	0.157804
	EIF3A	EIF3G	0.629031	0.157804
	EIF3B	EIF3G	0.629031	0.157804
	EIF3D	EIF3G	0.629031	0.157804
	EIF3E	EIF3G	0.629031	0.157804
	EIF3F	EIF3G	0.629031	0.157804
	EIF3G	EIF3H	0.629031	0.157804
	EIF3G	EIF3J	0.629031	0.157804
	EIF3G	EIF3L	0.629031	0.157804
	EIF3G	PIN1	0.629031	0.157804
	EIF3G	PKN2	0.629031	0.157804
	EIF3G	SNW1	0.629031	0.157804
	EIF3G	UBC	0.629031	0.157804
	EIF3L	IGSF8	0.629031	0.157804
	EIF3L	XRN2	0.629031	0.157804
	ELK4	FOS	0.629031	0.157804
	EP300	FOSL1	0.629031	0.157804
	EP300	RAD50	0.629031	0.157804
	EP300	RXRA	0.629031	0.157804
	EP300	SOX4	0.629031	0.157804
	EPHA4	FGFR4	0.629031	0.157804
	EPOR	LYN	0.629031	0.157804
	ERCC1	UBL7	0.629031	0.157804
	ERG	XRN2	0.629031	0.157804
	ERH	UBL4A	0.629031	0.157804
	ESR1	RXRA	0.629031	0.157804
	ETS1	PIAS4	0.629031	0.157804
	ETV4	TAF7	0.629031	0.157804
	EVL	LYN	0.629031	0.157804
	EZH2	UHRF1	0.629031	0.157804
	FAF2	UBL4A	0.629031	0.157804
	FANCM	TOP3A	0.629031	0.157804
	FEM1B	PPM1F	0.629031	0.157804
	FGF1	FGFR4	0.629031	0.157804
	FGF2	FGFR4	0.629031	0.157804
	FGF7	FGFR4	0.629031	0.157804
	FGFR2	LYN	0.629031	0.157804
	FGFR4	PLCG1	0.629031	0.157804
	FGFR4	STAT1	0.629031	0.157804
	FGFR4	STAT3	0.629031	0.157804
	FIS1	NOD2	0.629031	0.157804
	FKBP5	HSF1	0.629031	0.157804
	FLNA	IGSF8	0.629031	0.157804
	FLNC	LRP1	0.629031	0.157804
	FSD1L	LYN	0.629031	0.157804
	FURIN	LRP1	0.629031	0.157804
	FUS	RXRA	0.629031	0.157804
	FUS	UBL4A	0.629031	0.157804
	FYB	LYN	0.629031	0.157804
	FYN	RAF1	0.629031	0.157804
	GAB2	LYN	0.629031	0.157804
	GAB3	LYN	0.629031	0.157804
	GATA3	SOX4	0.629031	0.157804
	GET4	UBL4A	0.629031	0.157804
	GLRX3	NADK	0.629031	0.157804
	GNAI2	RASD1	0.629031	0.157804
	GNAQ	TUB	0.629031	0.157804
	GOSR1	STX5	0.629031	0.157804
	GOSR2	STX5	0.629031	0.157804
	GPX4	OTUD5	0.629031	0.157804
	GPX4	PRDX6	0.629031	0.157804
	GRB10	RAF1	0.629031	0.157804
	GRB2	NADK	0.629031	0.157804
	GRIP1	RXRA	0.629031	0.157804
	GSK3B	RXRA	0.629031	0.157804
	GULP1	LRP1	0.629031	0.157804
	HAUS1	HAUS2	0.629031	0.157804
	HAUS1	HAUS3	0.629031	0.157804
	HAUS1	HAUS6	0.629031	0.157804
	HAUS1	IFIT3	0.629031	0.157804
	HAUS1	INCA1	0.629031	0.157804
	HAUS1	KDM1A	0.629031	0.157804
	HAUS1	KIFC3	0.629031	0.157804
	HAUS1	LDOC1	0.629031	0.157804
	HAUS1	MCM3	0.629031	0.157804
	HAUS1	NDC80	0.629031	0.157804
	HCLS1	LYN	0.629031	0.157804
	HDAC1	PIAS4	0.629031	0.157804
	HDAC1	RFX1	0.629031	0.157804
	HDAC1	UHRF1	0.629031	0.157804
	HDAC2	PIAS4	0.629031	0.157804
	HDAC2	UHRF1	0.629031	0.157804
	HDAC3	RXRA	0.629031	0.157804
	HDAC4	RXRA	0.629031	0.157804
	HDAC5	RAD50	0.629031	0.157804
	HERC2	PIAS4	0.629031	0.157804
	HHEX	UBR5	0.629031	0.157804
	HIF1A	PIAS4	0.629031	0.157804
	HMGA1	RXRA	0.629031	0.157804
	HMGB1	RFX1	0.629031	0.157804
	HSPB1	UBL4A	0.629031	0.157804
	HUWE1	UBL4A	0.629031	0.157804
	ID3	MLX	0.629031	0.157804
	IFT57	RAD50	0.629031	0.157804
	IGSF8	ILF2	0.629031	0.157804
	IGSF8	ILF3	0.629031	0.157804
	IGSF8	THOC4	0.629031	0.157804
	IGSF8	XRCC5	0.629031	0.157804
	IL1B	LYN	0.629031	0.157804
	IL2RB	LYN	0.629031	0.157804
	IL2RB	RAF1	0.629031	0.157804
	ILF2	RAD50	0.629031	0.157804
	ILF2	UBL4A	0.629031	0.157804
	ILF3	RAD50	0.629031	0.157804
	ILF3	UBL4A	0.629031	0.157804
	ILK	RAF1	0.629031	0.157804
	ILVBL	UBL4A	0.629031	0.157804
	INSR	RAF1	0.629031	0.157804
	IRAK1	TIRAP	0.629031	0.157804
	IRAK2	TIRAP	0.629031	0.157804
	IRAK4	TIRAP	0.629031	0.157804
	IRF3	PIAS4	0.629031	0.157804
	IRF7	PIAS4	0.629031	0.157804
	ISG15	UBA7	0.629031	0.157804
	ITPR1	LYN	0.629031	0.157804
	JAK1	PML	0.629031	0.157804
	JAK2	LYN	0.629031	0.157804
	JAK2	RAF1	0.629031	0.157804
	JUN	MBD3	0.629031	0.157804
	JUN	PRKDC	0.629031	0.157804
	KAT5	LRP1	0.629031	0.157804
	KAT5	RAD50	0.629031	0.157804
	KAT5	UHRF1	0.629031	0.157804
	KIF2A	KLC1	0.629031	0.157804
	KIF2A	KLC2	0.629031	0.157804
	KIF2A	UBC	0.629031	0.157804
	KIT	LYN	0.629031	0.157804
	KNTC1	PIAS4	0.629031	0.157804
	KSR1	RAF1	0.629031	0.157804
	KYNU	LYN	0.629031	0.157804
	LAMP2	LYN	0.629031	0.157804
	LAMP2	PIAS4	0.629031	0.157804
	LATS1	RAF1	0.629031	0.157804
	LCK	RAF1	0.629031	0.157804
	LCP2	LYN	0.629031	0.157804
	LEF1	PIAS4	0.629031	0.157804
	LMAN2	UBL4A	0.629031	0.157804
	LNX1	NADK	0.629031	0.157804
	LNX1	STX5	0.629031	0.157804
	LRP1	MMP15	0.629031	0.157804
	LRP1	MMP17	0.629031	0.157804
	LRP1	PDGFB	0.629031	0.157804
	LRP1	RIC8B	0.629031	0.157804
	LRP1	SHC1	0.629031	0.157804
	LRP1	SKIL	0.629031	0.157804
	LRP1	SNX17	0.629031	0.157804
	LRP1	SRC	0.629031	0.157804
	LRP1	UBC	0.629031	0.157804
	LRRC4	NTNG2	0.629031	0.157804
	LSM3	XRN2	0.629031	0.157804
	LYN	MCM7	0.629031	0.157804
	LYN	MUC1	0.629031	0.157804
	LYN	NMT1	0.629031	0.157804
	LYN	OCLN	0.629031	0.157804
	LYN	PAK1	0.629031	0.157804
	LYN	PAK2	0.629031	0.157804
	LYN	PDE4A	0.629031	0.157804
	LYN	PDE4D	0.629031	0.157804
	LYN	PILRB	0.629031	0.157804
	LYN	PLCG1	0.629031	0.157804
	LYN	PLCG2	0.629031	0.157804
	LYN	PTPRC	0.629031	0.157804
	LYN	RASA1	0.629031	0.157804
	LYN	RGS16	0.629031	0.157804
	LYN	SHC1	0.629031	0.157804
	LYN	SKAP2	0.629031	0.157804
	LYN	SPHK1	0.629031	0.157804
	LYN	SRC	0.629031	0.157804
	LYN	STAT3	0.629031	0.157804
	LYN	TMX1	0.629031	0.157804
	LYN	TRPV4	0.629031	0.157804
	LYN	TTYH3	0.629031	0.157804
	LYN	TYK2	0.629031	0.157804
	LYN	UBB	0.629031	0.157804
	LYN	UBC	0.629031	0.157804
	MARK3	SAAL1	0.629031	0.157804
	MCM7	RAD50	0.629031	0.157804
	MDC1	RAD50	0.629031	0.157804
	MDM2	RAD50	0.629031	0.157804
	MDM2	SOX4	0.629031	0.157804
	MED1	RXRA	0.629031	0.157804
	MED24	RXRA	0.629031	0.157804
	MED25	RXRA	0.629031	0.157804
	MKL1	SRF	0.629031	0.157804
	MLH1	RAD50	0.629031	0.157804
	MLX	MLXIP	0.629031	0.157804
	MLX	MNT	0.629031	0.157804
	MLX	UBC	0.629031	0.157804
	MOCS3	XRN2	0.629031	0.157804
	MOGS	UBL4A	0.629031	0.157804
	MPP3	TIRAP	0.629031	0.157804
	MPRIP	PIAS4	0.629031	0.157804
	MSH2	RAD50	0.629031	0.157804
	MSH6	RAD50	0.629031	0.157804
	MYC	RAD50	0.629031	0.157804
	MYC	RAF1	0.629031	0.157804
	MYC	SPEG	0.629031	0.157804
	MYD88	TIRAP	0.629031	0.157804
	NBN	RAD50	0.629031	0.157804
	NCOA1	RXRA	0.629031	0.157804
	NCOA2	RXRA	0.629031	0.157804
	NCOA3	RXRA	0.629031	0.157804
	NCOA6	RXRA	0.629031	0.157804
	NCOR1	RXRA	0.629031	0.157804
	NCOR2	RXRA	0.629031	0.157804
	NEDD4	RAF1	0.629031	0.157804
	NFIB	RFX1	0.629031	0.157804
	NFIC	RFX1	0.629031	0.157804
	NFIX	RFX1	0.629031	0.157804
	NFKB1	RXRA	0.629031	0.157804
[truncated: 291 more rows]

## Sheet: Table S2
AURKA_module>>	Protein A	Protein B	H			DHX9_module>>	Protein A	Protein B	H			EED_module>>	Protein A	Protein B	H
	AURKA	BIRC5	0.629031				ASCC1	ASCC3	0.101373				AEBP2	EED	0.0910639
	AURKA	CBX3	0.629031				BOP1	DDX18	0.53853				BAZ1B	EED	0.0910639
	BUB1B	CDC26	0.629031				ABCF1	DHX9	0.322607				EED	EZH2	0.0910639
	CCNB1	CDC26	0.629031				DDX1	DHX9	0.322607				EED	HDAC1	0.0910639
	CDC16	CDC26	0.629031				DDX20	DHX9	0.322607				EED	HDAC2	0.0910639
	AURKA	CKAP5	0.629031				DGCR8	DHX9	0.322607				EED	KDM1A	0.0910639
	ATR	CLSPN	0.263649				DDX18	DKC1	0.53853				EED	MYH9	0.0910639
	CDC45	CLSPN	0.263649				ASCC3	EIF3F	0.101373				EED	NOP56	0.0910639
	CDC7	CLSPN	0.263649				EIF3B	EIF3M	0.535228				EED	PCBP1	0.0910639
	BLM	EXO1	0.114614				EIF3D	EIF3M	0.535228				EED	PHB2	0.0910639
	AURKA	HMMR	0.629031				EIF3E	EIF3M	0.535228				EED	RAD21	0.0910639
	BACH1	HMMR	0.174281				EIF3F	EIF3M	0.535228				EED	RAN	0.0910639
	EPHB2	HMMR	0.174281				EIF3K	EIF3M	0.521746				EED	SMC1A	0.0910639
	EHMT2	KDM1B	0.421819				EIF3L	EIF3M	0.535228				EED	SMC3	0.0910639
	AURKA	KIF11	0.336033				DHX9	HDAC5	0.322607				EED	TRRAP	0.0910639
	AURKA	KIF2C	0.629031				DHX9	HINFP	0.322607				EED	XRCC6	0.0910639
	EXO1	MSH2	0.117199				DHX9	ILF2	0.322607				ARRB2	TRAF3	0.19581
	CLSPN	MSH6	0.263649				DHX9	ILF3	0.322607				BIRC2	TRAF3	0.19581
	CDC26	NEK2	0.629031				BRD4	JMJD6	0.381891				BRAF	TRAF3	0.19581
	AURKA	PML	0.629031				CCNL1	JMJD6	0.381891				CASP3	TRAF3	0.19581
	EXO1	PMS1	0.122773				DNM1L	JMJD6	0.381891				NFKB2	TRAF3	0.19581
	AURKA	PTTG1	0.629031				DHX9	LBR	0.322607				SRC	TRAF3	0.19581
	CDC26	PTTG1	0.629031				DHX9	LGR4	0.322607				SUMO1	TRAF3	0.19581
	ATR	RAD9A	0.150158				DHX9	LYAR	0.322607				TRAF2	TRAF3	0.19581
	CLSPN	RAD9A	0.322607				DHX9	MBD2	0.322607				TRAF1	TRAF3	0.263649
	HUS1	RAD9A	0.150158				DHX9	MBNL1	0.322607				CASP3	RBX1	0.280494
	MSH2	RAD9A	0.150158				DHX9	MEX3C	0.322607				CCNA2	RBX1	0.280494
	MSH6	RAD9A	0.150158				KDM3A	MKL1	0.174281				CCNE1	RBX1	0.280494
	RAD1	RAD9A	0.150158				DDX18	NHP2	0.53853				CUL1	RBX1	0.280494
	AURKA	TACC3	0.629031				JMJD6	NHP2	0.381891				CUL2	RBX1	0.280494
	PLOD1	TERF2	0.53853				BIRC3	NOD2	0.629031				E2F1	RBX1	0.280494
	BLM	TOP3A	0.629031				CASP1	NOD2	0.629031				EZH2	RBX1	0.280494
	PML	TOP3A	0.629031				CASP4	NOD2	0.629031				FBXW7	RBX1	0.280494
	TERF2	TOP3A	0.629031				NLRC4	NOD2	0.629031				RBX1	SKP2	0.280494
	AURKA	TPX2	0.629031				DDX18	NOP2	0.53853				EIF3I	TFE3	0.329317
	HMMR	TPX2	0.322607				BOP1	NOP58	0.396818				ACTB	EIF3I	0.347103
	CDC26	UBE2C	0.629031				DKC1	NOP58	0.396818				EIF3I	RAD21	0.348154
	DNMT1	UHRF1	0.629031				GNL3	NOP58	0.396818				EIF3G	EIF3I	0.354353
	EHMT2	UHRF1	0.629031				NHP2	NOP58	0.396818				CDK3	E2F3	0.421819
	PML	UHRF1	0.629031				NOC4L	NOP58	0.396818				E2F3	HCFC1	0.421819
	KDM1B	WDR5	0.421819				NOLC1	NOP58	0.396818				E2F3	PCNA	0.421819
							NOP2	NOP58	0.396818				E2F3	RBL1	0.421819
							DISC1	PGK1	0.322607				E2F3	TFE3	0.421819
							HDAC5	PGK1	0.322607				E2F3	USF1	0.421819
							HIF1A	PGK1	0.322607				MCL1	PCNA	0.421819
							NRBF2	PGK1	0.322607				PDE6D	RHEB	0.421819
							DDX18	PINX1	0.53853				RAP1A	RHEB	0.421819
							DHX9	PINX1	0.322607				RHEB	TRAF2	0.421819
							DHX9	PRKDC	0.629031				ACTB	EMD	0.503057
							DHX9	PSMD8	0.322607				CDC37	EMD	0.503057
							FUS	PTBP2	0.528205				EMD	HDAC1	0.503057
							PTBP2	PUF60	0.528205				EMD	HDGF	0.503057
							PTBP2	QKI	0.528205				EMD	LMNA	0.503057
							DHX9	RALY	0.322607				EMD	MYH9	0.503057
							PTBP2	RBM10	0.528205				EMD	RBL1	0.503057
							DHX9	RBM8A	0.322607				ACTB	LYN	0.629031
							DHX9	RFC4	0.322607				ARRB2	RAF1	0.629031
							NOD2	RIPK2	0.629031				ATF3	DDIT3	0.629031
							ADRM1	RPN2	0.25457				ATF4	DDIT3	0.629031
							AUP1	RPN2	0.25457				BIRC2	RAF1	0.629031
							NDRG1	RPN2	0.25457				BRAF	RAF1	0.629031
							RPN1	RPN2	0.25457				CASP3	LYN	0.629031
							DHX9	RRS1	0.322607				CBL	LYN	0.629031
							NOP58	RRS1	0.396818				CDC5L	EED	0.0910639
							DHX9	SF3A2	0.322607				CDC5L	EIF3G	0.629031
							DHX9	SND1	0.322607				CDK1	LYN	0.629031
							ASCC3	SRF	0.122773				CDK2	LYN	0.629031
							ETV4	SRF	0.560914				CDK4	LYN	0.629031
							MKL1	SRF	0.629031				CDK6	DDIT3	0.629031
							PRKDC	SRF	0.503057				CEBPB	DDIT3	0.629031
							DHX9	SRPK1	0.322607				DDIT3	HDAC1	0.629031
							EIF3M	SRPK1	0.535228				DDX21	LYN	0.629031
							DHX9	SSRP1	0.322607				DVL2	LYN	0.629031
							MKL1	SSRP1	0.174281				EGFR	LYN	0.629031
							JMJD6	STAC3	0.381891				LYN	PLCG1	0.629031
							JMJD6	STAT1	0.381891				LYN	SRC	0.629031
							JMJD6	TAF1A	0.629031				MCL1	UHRF2	0.629031
							TAF1A	TAF1C	0.629031				MYC	RAF1	0.629031
							TAF1A	TAF1D	0.629031				RAD21	UBE3C	0.629031
							NOP58	TGS1	0.396818				RAF1	RHEB	0.629031
							NOD2	TLE1	0.629031				RAF1	SRC	0.629031
							PTBP2	TOM1	0.528205
							NOD2	TRAF4	0.629031
							DHX9	U2AF1	0.322607
							JMJD6	U2AF1	0.381891
							NOP58	U2AF1	0.396818
							AUP1	UBL4A	0.629031
							CDK18	UBL4A	0.629031
							DDX20	UBL4A	0.629031
							FUS	UBL4A	0.629031
							GET4	UBL4A	0.629031
							HUWE1	UBL4A	0.629031
							ILF2	UBL4A	0.629031
							ILF3	UBL4A	0.629031
							MOGS	UBL4A	0.629031
							PA2G4	UBL4A	0.629031
							RAB10	UBL4A	0.629031
							RAB35	UBL4A	0.629031
							RIOK1	UBL4A	0.629031
							RPN1	UBL4A	0.629031
							RPN2	UBL4A	0.629031
							SURF4	UBL4A	0.629031
							TMED1	UBL4A	0.629031
							TMED9	UBL4A	0.629031
							TRAF4	UBL4A	0.629031
							DHX9	WRN	0.322607
							IL21R	WSB2	0.706786
							RPN1	WSB2	0.606955
							DHX9	XPO1	0.322607

## Sheet: Table S3
AURKA_module>>		Transcriptome		Proteome			DHX9_module>>		Transcriptome		Proteome			EED_module>>		Transcriptome		Proteome
	GeneSymbol	p-value (FDR)	FC	p-value (FDR)	FC			GeneSymbol	p-value (FDR)	FC	p-value (FDR)	FC			GeneSymbol	p-value (FDR)	FC	p-value (FDR)	FC
	ATR	9.33443e-05	1.11358	NA	NA			ABCF1	0	1.50152	0.00981823	1.50101			LYN	0	2.63702	0	4.65761
	AURKA	0	2.3304	NA	NA			ADRM1	0	1.41999	0.504451	0.953538			CEBPB	0	3.09527	0	3.13915
	BACH1	0	1.21293	0.102315	1.3423			ASCC1	0	1.17622	NA	NA			EGFR	0	5.62497	0	5.58412
	BIRC5	0	3.68038	NA	NA			ASCC3	9.33443e-05	1.15516	0.396771	1.06537			TRAF2	0	1.17333	0.00139648	0.56879
	BLM	0	2.58795	0.315645	1.14916			AUP1	0	1.21368	0.396771	1.07934			CDK6	0	3.66408	0	2.66665
	BUB1B	0	2.21097	NA	NA			BIRC3	0	1.70557	NA	NA			CUL1	0	1.33671	0.00216563	1.57522
	CBX3	0	1.15565	0.0693003	0.717523			BOP1	0	2.91051	0.0290563	1.57286			RHEB	0	1.67394	0.00139648	1.87423
	CCNB1	0	1.82816	NA	NA			BRD4	0	1.22251	0.0157352	1.46765			CBL	0	1.22256	0.00432451	1.6107
	CDC16	0.000789299	1.08646	0.432357	0.922867			CASP1	0	1.54121	0.229374	1.29375			DDX21	0	1.36603	0.00432451	2.12403
	CDC26	0.000789299	1.11649	NA	NA			CASP4	0.000789299	1.13305	0.102315	1.37838			BAZ1B	0	1.18333	0.00432451	2.0114
	CDC45	0	3.23462	NA	NA			CCNL1	0	1.21637	NA	NA			SRC	0	1.46403	0.00981823	1.76172
	CDC7	0	2.39016	NA	NA			CDK18	0	2.12224	0.0290563	1.60846			EZH2	0	2.40934	0.00981823	1.76305
	CKAP5	0	1.32813	0.138601	1.19903			DDX1	0	1.17789	NA	NA			MYH9	0	1.15976	0.0157352	1.61941
	CLSPN	0	2.4224	NA	NA			DDX18	0	1.33916	0	2.09633			CDK1	0	2.0283	0.0290563	2.03459
	DNMT1	0	1.47463	0.183355	1.26553			DDX20	0	1.11152	0.474147	0.936927			RBL1	0	1.70135	NA	NA
	EHMT2	0	1.36151	0.508434	0.995031			DGCR8	0	1.14326	0.315645	1.11154			NFKB2	0	1.54838	0.0454659	1.47466
	EPHB2	0	1.71794	NA	NA			DHX9	0.000789299	1.06826	NA	NA			BIRC2	0	1.30744	0.183355	0.788089
	EXO1	0	3.18199	NA	NA			DISC1	0	1.47099	NA	NA			TRAF1	0	1.5848	NA	NA
	HMMR	0	1.93415	NA	NA			DKC1	0	1.83196	0.508434	0.992215			PLCG1	0	1.14028	0.102315	1.34076
	HUS1	0	1.10928	0.315645	1.12288			DNM1L	0	1.26045	0.0454659	1.32572			SMC3	9.33443e-05	1.11805	0.102315	1.27383
	KDM1B	0	1.42142	NA	NA			EIF3B	0	1.54274	NA	NA			ACTB	0	1.40407	0.102315	1.26495
	KIF11	0	1.92797	0.00432451	2.04973			EIF3D	0	1.25644	0.270141	1.11524			CDC37	0	1.19241	0.138601	1.25925
	KIF2C	0	3.66051	0	2.6095			EIF3E	0	1.57102	0.138601	1.2055			E2F3	0	2.47108	NA	NA
	MSH2	0	1.79773	0.00432451	1.75755			EIF3F	0.000789299	1.08631	0.508434	0.988719			HDAC1	0	1.18895	0.229374	0.837785
	MSH6	0	1.5983	0	2.36519			EIF3K	0	1.3909	0.315645	1.10546			CDK3	0	1.5218	0.102315	1.5165
	NEK2	0	1.94621	NA	NA			EIF3L	0	1.14165	0.138601	1.19413			UHRF2	0	1.35717	0.138601	1.32161
	PLOD1	0	2.62842	0	2.99734			EIF3M	0	1.31959	0.396771	1.05656			UBE3C	9.33443e-05	1.10319	0.138601	1.23412
	PML	0	1.63725	0.0157352	1.58588			ETV4	0	3.59962	NA	NA			HDGF	0	1.87718	0.138601	1.31352
	PMS1	0	1.14398	NA	NA			FUS	9.33443e-05	1.10812	0.493564	0.941769			RAP1A	0	1.12023	0.138601	1.34973
	PTTG1	0	2.74978	NA	NA			GET4	0	1.26077	0.508434	0.971175			MCL1	0	1.22701	0.138601	1.24367
	RAD1	0.00408807	1.061	0.506998	0.961191			GNL3	0	1.18203	0.35786	1.08901			CCNA2	0	2.86305	NA	NA
	RAD9A	0.00408807	1.08743	0.461416	0.895705			HDAC5	9.33443e-05	1.14036	0.432357	1.05279			PDE6D	0	1.145	0.229374	0.790353
	TACC3	0	2.00388	0.00216563	2.17467			HIF1A	0	1.52883	NA	NA			TRAF3	0	1.21283	NA	NA
	TERF2	0	1.14248	NA	NA			HINFP	0	1.25381	NA	NA			EED	0	1.4633	0.183355	1.20801
	TOP3A	0.000789299	1.09507	0.138601	1.25533			HUWE1	0	1.17291	0.35786	1.10313			LMNA	0	1.54697	0.229374	1.24674
	TPX2	0	2.9988	0.00432451	2.263			IL21R	0	1.64346	NA	NA			HCFC1	0	1.15637	0.315645	1.08044
	UBE2C	0	3.35338	0.229374	1.39644			ILF2	0	1.82328	0.432357	1.03352			CASP3	0.000789299	1.08455	0.229374	1.17449
	UHRF1	0	1.63818	0.102315	1.56975			ILF3	0	1.31863	0.396771	1.04898			SMC1A	9.33443e-05	1.13826	0.270141	1.14981
	WDR5	0	1.36284	0.138601	1.20527			JMJD6	0	1.48858	0.508434	0.998557			KDM1A	0	1.49705	0.432357	0.913569
								KDM3A	9.33443e-05	1.10616	0.00432451	1.77565			EIF3G	0.000789299	1.11646	0.315645	1.09787
								LBR	0	2.69536	0	3.25451			DVL2	0	1.26387	0.270141	1.14152
								LGR4	0	1.44929	NA	NA			BRAF	9.33443e-05	1.14877	0.432357	0.909568
								LYAR	0	1.96263	0	2.74574			RAD21	0	1.41255	0.315645	1.08554
								MBD2	9.33443e-05	1.10796	0.461416	0.928552			RBX1	0	1.24341	0.35786	1.07505
								MBNL1	0	1.20806	0.0157352	1.5601			NOP56	0	1.35037	0.35786	1.09355
								MEX3C	0	1.36636	NA	NA			PHB2	0	1.45817	0.35786	1.11763
								MKL1	0	1.23523	0.229374	0.759045			CDK2	0	1.22832	0.35786	1.10198
								MOGS	0	1.5301	0.00216563	1.85577			TFE3	0.000789299	1.069	NA	NA
								NDRG1	0	3.22958	0	4.00267			CDK4	0	1.38202	0.396771	1.08464
								NHP2	0.000789299	1.10174	0.0693003	0.690345			RAN	0	1.43353	0.461416	1.02491
								NLRC4	9.33443e-05	1.1686	NA	NA			CCNE1	0	7.22087	NA	NA
								NOC4L	0.00408807	1.08883	0.183355	1.16678			EMD	0	1.2	0.432357	1.0596
								NOD2	0	1.38474	NA	NA			RAF1	0	1.12979	0.508434	0.972804
								NOLC1	0	1.29388	0.229374	1.4254			AEBP2	0	1.2461	NA	NA
								NOP2	0	2.07458	NA	NA			PCBP1	0	1.14472	0.461416	1.00886
								NOP58	0	1.5594	0.396771	1.06395			MYC	0	2.36084	NA	NA
								NRBF2	0	1.46804	0.00981823	1.79902			PCNA	0	1.47468	0.461416	1.01467
								PA2G4	0.000789299	1.08267	NA	NA			ARRB2	0	1.35188	NA	NA
								PGK1	0	1.35296	0.396771	1.07841			ATF3	0	1.44485	NA	NA
								PINX1	0	1.59194	NA	NA			ATF4	0	1.50736	NA	NA
								PRKDC	0	1.56102	0.138601	1.30664			CDC5L	0	1.36135	NA	NA
								PSMD8	0	1.21958	0.461416	0.935677			CUL2	0	1.29217	NA	NA
								PTBP2	0	1.45882	0.00432451	2.04716			DDIT3	0	1.20351	NA	NA
								PUF60	0	1.58673	0.35786	1.0705			E2F1	0	2.33128	NA	NA
								QKI	0	1.63401	0	1.87321			EIF3I	0	1.14431	NA	NA
								RAB10	0.000789299	1.07892	0.315645	1.17559			FBXW7	0	1.20397	NA	NA
								RAB35	9.33443e-05	1.08942	0.315645	1.12696			HDAC2	0	1.91013	NA	NA
								RALY	0	1.29992	0.229374	1.21404			SKP2	0	2.55483	NA	NA
								RBM10	0	1.12324	NA	NA			SUMO1	0	1.17618	NA	NA
								RBM8A	0	1.30048	NA	NA			TRRAP	0	1.2325	NA	NA
								RFC4	0	2.1523	0.102315	1.28825			USF1	0	1.19156	NA	NA
								RIOK1	0	2.05801	0.00139648	1.95049			XRCC6	0	1.29913	NA	NA
								RIPK2	0	2.20219	0.00139648	1.95472
								RPN1	0	1.4055	0.102315	1.48459
								RPN2	0.000789299	1.098	0.102315	1.52019
								RRS1	0	1.44816	0.270141	1.22904
								SF3A2	0	1.21909	0.396771	0.899931
								SND1	0	1.28612	0.00981823	1.491
								SRF	0	1.64015	NA	NA
								SRPK1	0	2.17123	0	2.03424
								SSRP1	0	1.6376	0.183355	1.25655
								STAC3	0.000789299	1.16482	NA	NA
								STAT1	0	1.27	0.508434	0.992284
								SURF4	9.33443e-05	1.09903	0.432357	1.10023
								TAF1A	0	1.2328	NA	NA
								TAF1C	0	1.3942	NA	NA
								TAF1D	0	1.63447	NA	NA
								TGS1	0	1.46544	NA	NA
								TLE1	0	2.121	NA	NA
								TMED1	9.33443e-05	1.1282	NA	NA
								TMED9	0.000789299	1.10077	0.35786	0.848225
								TOM1	9.33443e-05	1.13482	0.00981823	1.68553
								TRAF4	9.33443e-05	1.14808	0.315645	1.21112
								U2AF1	0	1.50947	0.183355	1.22337
								UBL4A	0	1.24602	0.229374	0.800693
								WRN	0.00408807	1.09789	NA	NA
								WSB2	0.000789299	1.09652	NA	NA
								XPO1	0	1.26721	0.315645	1.0968

## Sheet: Table S4
EED_module		Synonym	DrugBank ID	Perturbation	type	groups	atc_codes	categories	description
DHX9_module		Propafenone	DB01182	S-2500	small molecule	approved	C01BC03	Adrenergic Antagonists|Adrenergic beta-Antagonists|Antiarrhythmic agents|Antiarrhythmics, Class I and III|Antiarrhythmics, Class Ic|Bradycardia-Causing Agents|Cardiac Therapy|Cardiovascular Agents|Cardiovascular System|Class IC Antiarrythmics|Cytochrome P-450 CYP1A2 Substrates|Cytochrome P-450 CYP2D6 Inhibitors|Cytochrome P-450 CYP2D6 Inhibitors (strong)|Cytochrome P-450 CYP2D6 Substrates|Cytochr…	An antiarrhythmia agent that is particularly effective in ventricular arrhythmias. It also has weak beta-blocking activity. The drug is generally well tolerated. [PubChem]
AURKA		Staurosporine	DB02010	BRD-K17953061	small molecule	experimental		Alkaloids|Carbazoles|Enzyme Inhibitors|Heterocyclic Compounds|Heterocyclic Compounds, 2-Ring|Heterocyclic Compounds, 3-Ring|Indole Alkaloids|Indoles|P-glycoprotein/ABCB1 Inhibitors	An indolocarbazole that is a potent protein kinase C inhibitor which enhances cAMP-mediated responses in human neuroblastoma cells. (Biochem Biophys Res Commun 1995;214(3):1114-20)
2 modules		Andarine		S1140					Androgen receptor modulator
3 modules		Apitolisib	DB12180	GDC-0980	small molecule	investigational		Bicyclo Compounds|Bridged Compounds|Heterocyclic Compounds|Heterocyclic Compounds, 1-Ring|Heterocyclic Compounds, 2-Ring|Heterocyclic Compounds, Bridged-Ring|Hydrocarbons|Hydrocarbons, Cyclic|Phosphatidylinositol 3-Kinase, antagonists & inhibitors|Polycyclic Compounds	Apitolisib has been used in trials studying the treatment of Solid Cancers, Breast Cancer, Prostate Cancer, Renal Cell Carcinoma, and Endometrial Carcinoma, among others.
			DB05424	Canertinib	small molecule	investigational		Acids, Acyclic|Anesthetics|Antineoplastic Agents|Carboxylic Acids|Cardiotonic Agents|Cardiovascular Agents|Central Nervous System Agents|Heterocyclic Compounds|Heterocyclic Compounds, 1-Ring|Oxazines|Peripheral Nervous System Agents|Protective Agents|Sensory System Agents|Specialty Uses of Chemicals	Canertinib is a pan-erbB tyrosine kinase inhibitor which work against esophageal squamous cell carcinoma in vitro and in vivo. Canertinib treatment significantly affects tumour metabolism, proliferation and hypoxia as determined by PET.
		Fedratinib	DB12500	TG101348	small molecule	investigational		Amides|Heterocyclic Compounds|Heterocyclic Compounds, 1-Ring|Sulfones|Sulfur Compounds	Fedratinib has been used in trials studying the treatment and basic science of Solid Tumor, Myelofibrosis, Renal Impairment, Neoplasm Malignant, and Hepatic Impairment, among others.
		Gestrinone	DB11619	BRD-A94793051	small molecule	approved	G03XA02	Antigonadotropins and Similar Agents|Contraceptive Agents|Contraceptive Agents, Female|Contraceptives, Oral|Genito Urinary System and Sex Hormones|Hormones|Hormones, Hormone Substitutes, and Hormone Antagonists|Norgestrienone|Norpregnanes|Norpregnatrienes|Norsteroids|Oral Contraceptive (Progestins)|Polycyclic Compounds|Progestin Contraceptives|Progestins|Reproductive Control Agents|Sex Hormones a…	Gestrinone, also known as ethylnorgestrienone, is a synthetic steroid of the 19-nortestosterone group that is marketed in Europe, Australia, and Latin America, though not the United States or Canada, and is used primarily in the treatment of endometriosis._x000D_ _x000D_ Gestrinone was developed in the early 1970s and was tested clinically as a weekly oral contraceptive in Europe and North Americ…
			DB00991	Oxaprozin	small molecule	approved	M01AE12	Acids, Acyclic|Analgesics|Analgesics, Non-Narcotic|Anti-Inflammatory Agents|Anti-Inflammatory Agents, Non-Steroidal|Anti-Inflammatory Agents, Non-Steroidal (Non-Selective)|Antiinflammatory and Antirheumatic Products|Antiinflammatory and Antirheumatic Products, Non-Steroids|Antirheumatic Agents|Carboxylic Acids|Central Nervous System Agents|COX Inhibitors|COX-1 Inhibitors|COX-2 Inhibitors|Fatty Ac…	Oxaprozin is a non-narcotic, non-steroidal anti-inflammatory drug (NSAID), used to relieve the inflammation, swelling, stiffness, and joint pain associated with osteoarthritis and rheumatoid arthritis.
			DB06412	Oxymetholone	small molecule	approved|illicit	A14AA05	Alimentary Tract and Metabolism|Anabolic Agents|Anabolic Agents for Systemic Use|Anabolic Steroids|Androgens|Androstan Derivatives|Androstanes|Androstanols|Cytochrome P-450 Enzyme Inhibitors|Hormones|Hormones, Hormone Substitutes, and Hormone Antagonists|Polycyclic Compounds|Steroids	Oxymetholone is a synthetic anabolic steroid marketed under the brand name Anapolon by Hoffmann La Roche Limited. Its primary clinical applications include treatment of osteoporosis and anaemia, as well as stimulating muscle growth in malnourished or underdeveloped patients. Anabolic-androgenic steroids (AAS), such as oxymetholone, have been abused by bodybuilders and athletes. The uncontrolled m…
		Rilmenidine	DB11738	BRD-K52080565	small molecule	approved|investigational	C02AC06	Adrenergic Agents|Antihypertensive Agents|Cardiovascular Agents	Rilmenidine has been used in trials studying the treatment of Hypertension and Chronic Kidney Disease.
			DB11805	Saracatinib	small molecule	investigational		Antineoplastic Agents|Dioxoles|Enzyme Inhibitors|Heterocyclic Compounds|Heterocyclic Compounds, 1-Ring|Heterocyclic Compounds, 2-Ring	Saracatinib has been investigated for the treatment of Cancer, Osteosarcoma, Ovarian Cancer, Fallopian Tube Cancer, and Primary Peritoneal Cancer.
			DB01420	Testosterone propionate	small molecule	approved|investigational|vet_approved|withdrawn		Androgens|Androstanes|Androstenes|Androstenols|Gonadal Hormones|Gonadal Steroid Hormones|Hormones|Hormones, Hormone Substitutes, and Hormone Antagonists|P-glycoprotein/ABCB1 Substrates|Polycyclic Compounds|Steroids|Testosterone|Testosterone Congeners|UGT1A1 Inducers	Testosterone propionate is a slower releasing anabolic steroid with a short half-life. This characteristic allows the user to run short testosterone propionate cycles of 8-10 weeks as optimal peak blood plasma levels are achieved at 2-4 weeks.[L1159] It is a synthetic androstane steroid derivative of testosterone in the form of 17β propionate ester of testosterone.[T83] Testosterone propionate wa…
				PF-431396					Unknown
				withaferin-a					Unknown
		Triptolide	DB12025	16-HYDROXYTRIPTOLIDE	small molecule	investigational		Alkylating Agents|Antineoplastic Agents|Antineoplastic Agents, Alkylating|Antispermatogenic Agents|Contraceptive Agents|Contraceptive Agents, Male|Ethers|Ethers, Cyclic|Hydrocarbons|Hydrocarbons, Aromatic|Hydrocarbons, Cyclic|Immunologic Factors|Immunosuppressive Agents|Macrocyclic Compounds|Noxae|Polycyclic Compounds|Polycyclic Hydrocarbons, Aromatic|Reproductive Control Agents|Terpenes|Toxic Ac…	Triptolide has been used in trials studying the treatment of HIV, Crohn's Disease, Intestinal Diseases, Gastrointestinal Diseases, and Digestive System Diseases, among others.
		Flucytosine	DB01099	5-fluorocytosine	small molecule	approved|investigational	D01AE21|J02AX01	Anti-Infective Agents|Antifungal Agents|Antifungals for Dermatological Use|Antifungals for Topical Use|Antiinfectives for Systemic Use|Antimetabolites|Antimycotics for Systemic Use|Cytosine|Dermatologicals|Heterocyclic Compounds|Heterocyclic Compounds, 1-Ring|Immunosuppressive Agents|Myelosuppressive Agents|Noxae|Nucleoside Analog Antifungal|Pyrimidines|Pyrimidinones|Toxic Actions	A fluorinated cytosine analog that is used as an antifungal agent. [PubChem]
				BI-2536					PLK inhibitor
			DB01406	Danazol	small molecule	approved	G03XA01	Androgens|Antigonadotropins and Similar Agents|Cytochrome P-450 CYP3A Inhibitors|Cytochrome P-450 CYP3A4 Inhibitors|Cytochrome P-450 CYP3A4 Inhibitors (moderate)|Cytochrome P-450 Enzyme Inhibitors|Estrogen Antagonists|Genito Urinary System and Sex Hormones|Hormone Antagonists|Hormones, Hormone Substitutes, and Hormone Antagonists|Hyperglycemia-Associated Agents|Polycyclic Compounds|Pregnadienes|P…	A synthetic steroid with antigonadotropic and anti-estrogenic activities that acts as an anterior pituitary suppressant by inhibiting the pituitary output of gonadotropins. It possesses some androgenic properties. Danazol has been used in the treatment of endometriosis and some benign breast disorders. [PubChem]
			DB00445	Epirubicin	small molecule	approved	L01DB03	Anthracycline Topoisomerase Inhibitor|Anthracyclines|Anthracyclines and Related Substances|Antibiotics, Antineoplastic|Antineoplastic Agents|Antineoplastic and Immunomodulating Agents|Carbohydrates|Cardiotoxic antineoplastic agents|Cytotoxic Antibiotics and Related Substances|Daunorubicin|Doxorubicin|Enzyme Inhibitors|Glycosides|Hydrocarbons|Hydrocarbons, Aromatic|Hydrocarbons, Cyclic|Immunosuppr…	An anthracycline which is the 4&#39;-epi-isomer of doxorubicin. The compound exerts its antitumor effects by interference with the synthesis and function of DNA. [PubChem]
				PP 2					Src inhibitor
				BRD-A36630025					Topoisomerase inhibitor
				CX-5461					Unknown
				INK-128					Unknown
				JNK-9L					Unknown
				SB590885					Unknown
				AS-605240					Unknown
			DB00444	Teniposide	small molecule	approved	L01CB02	Antineoplastic Agents|Antineoplastic and Immunomodulating Agents|BCRP/ABCG2 Substrates|Carbohydrates|Cardiotoxic antineoplastic agents|Cytochrome P-450 CYP3A Substrates|Cytochrome P-450 CYP3A4 Substrates|Cytochrome P-450 Enzyme Inhibitors|Enzyme Inhibitors|Glucosides|Glycosides|Immunosuppressive Agents|Myelosuppressive Agents|P-glycoprotein/ABCB1 Substrates|Podophyllotoxin Derivatives|Topoisomera…	A semisynthetic derivative of podophyllotoxin that exhibits antitumor activity. Teniposide inhibits DNA synthesis by forming a complex with topoisomerase II and DNA. This complex induces breaks in double stranded DNA and prevents repair by topoisomerase II binding. Accumulated breaks in DNA prevent cells from entering into the mitotic phase of the cell cycle, and lead to cell death. Teniposide ac…
			DB08916	Afatinib	small molecule	approved	L01XE13	Antineoplastic Agents|Antineoplastic and Immunomodulating Agents|BCRP/ABCG2 Inhibitors|BCRP/ABCG2 Substrates|Heterocyclic Compounds|Heterocyclic Compounds, 2-Ring|Kinase Inhibitor|P-glycoprotein/ABCB1 Inhibitors|P-glycoprotein/ABCB1 Substrates|Protein Kinase Inhibitors	Afatinib is a 4-anilinoquinazoline tyrosine kinase inhibitor in the form of a dimaleate salt available as Boehringer Ingelheim's brand name Gilotrif [FDA Label]. For oral use, afatinib tablets are a first-line (initial) treatment for patients with metastatic non-small cell lung cancer (NSCLC) with common epidermal growth factor receptor (EGFR) mutations as detected by an FDA-approved test [L2939]…
			DB01103	Quinacrine	small molecule	approved|investigational	P01AX05	Acridines|Aminoacridines|Anti-Infective Agents|Anticestodal Agents|Antimalarials|Antinematodal Agents|Antiparasitic Agents|Antiparasitic Products, Insecticides and Repellents|Antiplatyhelmintic Agents|Antiprotozoals|Enzyme Inhibitors|Heterocyclic Compounds|Heterocyclic Compounds, 3-Ring|P-glycoprotein/ABCB1 Inhibitors	An acridine derivative formerly widely used as an antimalarial but superseded by chloroquine in recent years. It has also been used as an anthelmintic and in the treatment of giardiasis and malignant effusions. It is used in cell biological experiments as an inhibitor of phospholipase A2.
			DB12774	AZD-8055	small molecule	investigational		Heterocyclic Compounds|Heterocyclic Compounds, 1-Ring|Oxazines	AZD8055 has been used in trials studying the treatment of Cancer, Lymphomas, Solid Tumors, MALIGNANT GLIOMA, and brainstem glioma, among others.
			DB05928	Dovitinib	small molecule	investigational		Heterocyclic Compounds|Heterocyclic Compounds, 2-Ring|Quinolines	Dovitinib is an orally active small molecule that exhibits potent inhibitory activity against multiple RTKs involved in tumor growth and angiogenesis. Preclinical data show that dovitinib works to inhibit multiple kinases associated with different cancers, including acute myeloid leukemia (AML) and multiple myeloma. Chiron currently has three ongoing Phase I clinical trials for dovitinib.
				Tyrphostin AG 1478					EGFR inhibitor
			DB00530	Erlotinib	small molecule	approved|investigational	L01XE03	Antineoplastic Agents|Antineoplastic and Immunomodulating Agents|BCRP/ABCG2 Inhibitors|Cytochrome P-450 CYP1A2 Substrates|Cytochrome P-450 Enzyme Inhibitors|Enzyme Inhibitors|Heterocyclic Compounds|Heterocyclic Compounds, 2-Ring|Kinase Inhibitor|P-glycoprotein/ABCB1 Inhibitors|P-glycoprotein/ABCB1 Substrates|Protein Kinase Inhibitors|Quinazolines|Tyrosine Kinase Inhibitors|UGT1A1 Inhibitors	Erlotinib hydrochloride (trade name Tarceva, Genentech/OSIP, originally coded as OSI-774) is a drug used to treat non-small cell lung cancer, pancreatic cancer and several other types of cancer._x000D_ _x000D_ Similar to gefitinib, erlotinib specifically targets the epidermal growth factor receptor (EGFR) tyrosine kinase. It binds in a reversible fashion to the adenosine triphosphate (ATP) bindin…
				BRD-K68548958					histone acetyltransferase inhibitor
		Homosalate	DB11064	BRD-A34751532	small molecule	approved|investigational		Acids, Carbocyclic|Benzene Derivatives|Benzoates|Carboxylic Acids|Hydrocarbons|Hydrocarbons, Aromatic|Hydrocarbons, Cyclic|Hydroxy Acids|Hydroxybenzoates|Phenols|Sunscreening Agents	Homosalate is an organic compound that belongs to salicylates. It is an ester formed from salicylic acid and 3,3,5-trimethylcyclohexanol, a derivative of cyclohexanol. Salicylates prevent direct skin exposure to the sun’s harmful rays by absorbing ultraviolet (UV) light. Homosalate specifically absorbs short-wave UVB rays, which are associated with DNA damage and increased risk of skin cancer. _x…
				MK-0591					leukotriene synthesis inhibitor
				Nutlin-3					MDM inhibitor
				U-0126					MEK inhibitor
		Cytochalasin-b		BRD-K26664453					microtubule inhibitor
			DB09239	Niguldipine	small molecule	experimental		Adrenergic alpha-1 Receptor Antagonists|Adrenergic alpha-Antagonists|Adrenergic Antagonists|Antiarrhythmic agents|Antihypertensive Agents|Antineoplastic Agents|Calcium Channel Blockers|Cardiovascular Agents|Heterocyclic Compounds|Heterocyclic Compounds, 1-Ring|Membrane Transport Modulators|P-glycoprotein/ABCB1 Inhibitors|Pyridines|Vasodilating Agents	Niguldipine is a calcium channel blocker and a1-adrenergic receptor antagonist.
			DB09073	Palbociclib	small molecule	approved|investigational	L01XE33	Antineoplastic Agents|Antineoplastic and Immunomodulating Agents|Cyclin-Dependent Kinases, antagonists & inhibitors|Cytochrome P-450 CYP3A Inhibitors|Cytochrome P-450 CYP3A4 Inhibitors|Cytochrome P-450 CYP3A4 Inhibitors (weak)|Cytochrome P-450 Enzyme Inhibitors|Enzyme Inhibitors|Heterocyclic Compounds|Heterocyclic Compounds, 1-Ring|Immunosuppressive Agents|Kinase Inhibitor|Myelosuppressive Agents…	Palbociclib is an oral, reversible, selective, small-molecule inhibitor of CDK4 and CDK6 indicated in combination with letrozole for the treatment of postmenopausal women with estrogen receptor (ER)-positive, human epidermal growth factor receptor 2 (HER2)-negative advanced breast cancer as initial endocrine-based therapy for their metastatic disease. CDK4 and CDK6 along with their regulatory par…
			DB05524	Pelitinib	small molecule	investigational		Amines|Heterocyclic Compounds|Heterocyclic Compounds, 2-Ring|Quinolines|Receptor, Epidermal Growth Factor, antagonists & inhibitors	Pelitinib (EKB-569) is a potent, low molecular weight, selective, and irreversible inhibitor of epidermal growth factor receptor (EGFR) that is being developed as an anticancer agent.
				AG-879					Tyrosine kinase inhibitor
		Quinoclamine		BRD-K66792149					Unknown
				BRD-K86574132					Unknown
				CAM-9-027-3					Unknown
				CAY10594					Unknown
				DL-PDMP					Unknown
				GW405833 hydrochloride					Unknown
				PF 750					Unknown
				PP-110					Unknown
				thiazolopyrimidine					Unknown
		Thapsigargin		BRD-A62809825					Unknown
		Naproxol		BRD-K34014345					Unknown
		Pyrvinium-pamoate		BJM-ctd2-9					androgen receptor antagonist
				NVP-TAE684					ALK tyrosine kinase receptor inhibitor
			DB03496	Alvocidib	small molecule	experimental|investigational		Antineoplastic Agents|BCRP/ABCG2 Substrates|Benzopyrans|Chromones|Cyclin-Dependent Kinases, antagonists & inhibitors|Enzyme Inhibitors|Growth Inhibitors|Growth Substances|Heterocyclic Compounds|Heterocyclic Compounds, 1-Ring|Heterocyclic Compounds, 2-Ring|Protein Kinase Inhibitors|Pyrans|UGT1A1 Substrates	Alvocidib is a synthetic flavonoid based on an extract from an Indian plant for the potential treatment of cancer. It works by inhibiting cyclin-dependent kinases, arresting cell division and causing apoptosis in non-small lung cancer cells.
			DB00990	Exemestane	small molecule	approved|investigational	L02BG06	Androstanes|Androstenes|Antineoplastic Agents|Antineoplastic and Immunomodulating Agents|Aromatase Inhibitors|Endocrine Therapy|Enzyme Inhibitors|Estrogen Antagonists|Hormone Antagonists|Hormone Antagonists and Related Agents|Hormones, Hormone Substitutes, and Hormone Antagonists|Polycyclic Compounds|Steroid Synthesis Inhibitors|Steroids	Exemestane is an oral steroidal aromatase inhibitor used in the adjuvant treatment of hormonally-responsive (also called hormone-receptor-positive, estrogen-responsive) breast cancer in postmenopausal women. It acts as a false substrate for the aromatase enzyme, and is processed to an intermediate that binds irreversibly to the active site of the enzyme causing its inactivation.
				NVP-AUY922					HSP inhibitor
			DB01259	Lapatinib	small molecule	approved|investigational	L01XE07	Antineoplastic Agents|Antineoplastic and Immunomodulating Agents|Cytochrome P-450 CYP3A Inhibitors|Cytochrome P-450 CYP3A4 Inhibitors|Cytochrome P-450 CYP3A4 Inhibitors (weak)|Cytochrome P-450 Enzyme Inhibitors|Enzyme Inhibitors|Heterocyclic Compounds|Heterocyclic Compounds, 2-Ring|Kinase Inhibitor|P-glycoprotein/ABCB1 Inhibitors|Potential QTc-Prolonging Agents|Protein Kinase Inhibitors|QTc Prolo…	Lapatinib is an anti-cancer drug developed by GlaxoSmithKline (GSK) as a treatment for solid tumours such as breast and lung cancer. It was approved by the FDA on March 13, 2007, for use in patients with advanced metastatic breast cancer in conjunction with the chemotherapy drug Capecitabine. Lapatinib is human epidermal growth factor receptor type 2 (HER2/ERBB2) and epidermal growth factor recep…
			DB00744	Zileuton	small molecule	approved|investigational|withdrawn		Agents to Treat Airway Disease|Analgesics|Analgesics, Non-Narcotic|Anti-Inflammatory Agents|Central Nervous System Agents|Cytochrome P-450 CYP1A2 Inhibitors|Cytochrome P-450 CYP1A2 Substrates|Cytochrome P-450 Enzyme Inhibitors|Enzyme Inhibitors|Hormone Antagonists|Hormones, Hormone Substitutes, and Hormone Antagonists|Leukotriene Antagonists|Lipoxygenase Inhibitors|Peripheral Nervous System Agent…	Leukotrienes are substances that induce numerous biological effects including augmentation of neutrophil and eosinophil migration, neutrophil and monocyte aggregation, leukocyte adhesion, increased capillary permeability, and smooth muscle contraction. These effects contribute to inflammation, edema, mucus secretion, and bronchoconstriction in the airways of asthmatic patients. Zileuton relieves …
				PD-184352					MEK inhibitor
				GR-231					Unknown
				mestanolone					Unknown
				BRD-K06666320					Unknown
			DB08059	Wortmannin	small molecule	experimental		Androstanes|Androstenes|Anti-Infective Agents|Antifungal Agents|Enzyme Inhibitors|Hormone Antagonists|Hormones, Hormone Substitutes, and Hormone Antagonists|Immunologic Factors|Immunosuppressive Agents|Insulin Antagonists|Mycotoxins|Neurotransmitter Agents|Phosphatidylinositol 3-Kinases, antagonists & inhibitors|Phosphodiesterase Inhibitors|Polycyclic Compounds|Protein Kinase Inhibitors|Radiation…	Wortmannin, a steroid metabolite of the fungi Penicillium funiculosum, Talaromyces wortmannii, is a non-specific, covalent inhibitor of phosphoinositide 3-kinases (PI3Ks).
			DB02424	Geldanamycin	small molecule	experimental|investigational		Amides|Anti-Infective Agents|Antibiotics, Antineoplastic|Antineoplastic Agents|Antiviral Agents|Cysteine Proteinase Inhibitors|Enzyme Inhibitors|Heterocyclic Compounds|Heterocyclic Compounds, 1-Ring|HSP90 Heat-Shock Proteins|Lactams|Macrocyclic Compounds|Polycyclic Compounds|Protease Inhibitors|Quinones|Tyrosine Kinase Inhibitors
			DB03758	Radicicol	small molecule	experimental		Anti-Infective Agents|Antifungal Agents|Antiparasitic Agents|Antiprotozoals|Enzyme Inhibitors|Lactones|Macrocyclic Compounds|Polycyclic Compounds|Polyketides|Tyrosine Kinase Inhibitors
				(-)-cotinine					Unknown
				BIBX 1382 dihydrochloride					Unknown
			DB06061	AZD-8330	small molecule	investigational			AZD-8330 is a potent, selective, orally active MEK inhibitor that blocks signal transduction pathways implicated in cancer cell proliferation and survival. AZD-8330 has shown tumor suppressive activity in multiple preclinical models of human cancer including melanoma, pancreatic, colon, lung, and breast cancers.
			DB07101	PD-0325901	small molecule	investigational			PD-0325901 has been used in trials studying the treatment and basic science of Melanoma, Solid Tumour, Solid Tumors, Advanced Cancer, and Breast Neoplasms, among others.
				TGX-221					PI3K inhibitor
				PLX-4720					RAF inhibitor
			DB11689	Selumetinib	small molecule	investigational		Heterocyclic Compounds|Heterocyclic Compounds, 2-Ring	Selumetinib is under investigation for the treatment of Carcinoma, Thymic, Non-Small Cell Lung Cancer, and Carcinoma, Small Cell Lung. AZD6244 has been investigated for the treatment and basic science of Melanoma, Solid Tumours, Breast Cancer, Non Small Cell Lung Cancer, and Non Small Cell Lung Carcinoma, among others.
		Selumetinib	DB11689	BRD-K57080016	small molecule	investigational		Heterocyclic Compounds|Heterocyclic Compounds, 2-Ring	Selumetinib is under investigation for the treatment of Carcinoma, Thymic, Non-Small Cell Lung Cancer, and Carcinoma, Small Cell Lung. AZD6244 has been investigated for the treatment and basic science of Melanoma, Solid Tumours, Breast Cancer, Non Small Cell Lung Cancer, and Non Small Cell Lung Carcinoma, among others.
			DB08911	Trametinib	small molecule	approved	L01XE25	Antineoplastic Agents|Antineoplastic and Immunomodulating Agents|Cytochrome P-450 Enzyme Inducers|Cytochrome P-450 Enzyme Inhibitors|Enzyme Inhibitors|Heterocyclic Compounds|Heterocyclic Compounds, 1-Ring|Kinase Inhibitor|MAP Kinase Kinase 1, antagonists & inhibitors|MAP Kinase Kinase 2, antagonists & inhibitors|Protein Kinase Inhibitors|Pyridines|Pyrimidines	Trametinib dimethyl sulfoxide is a kinase inhibitor. Each 1-mg tablet contains 1.127 mg trametinib dimethyl sulfoxide equivalent to 1 mg of trametinib non-solvated parent. FDA approved on May 29, 2013 [L2727]._x000D_ _x000D_ The U.S. Food and Drug Administration approved [DB08912](Tafilnar) and Mekinist (trametinib), administered together, for the treatment of anaplastic thyroid cancer (ATC) that…
				JWE-035					Unknown
				BMS-536924					IGF-1 inhibitor

## Sheet: Table S5
subtype	Basal	Basal	Basal	Basal	Basal	Basal	Basal	Basal	Basal	Basal	Basal	Basal	Basal	Basal	Basal	Basal	Basal	Basal	Basal	Basal	Basal	Basal	Basal	Basal	Basal	Basal	Basal	Basal	Basal	Basal	Basal	Basal	Basal	Basal	Basal	Basal	Basal	Basal	Basal	Basal	Basal	Basal	Basal	Basal	Basal	Basal	Basal	Basal	Basal
TCGA-Barcode	TCGA-A1-A0SK-01A	TCGA-A1-A0SO-01A	TCGA-A1-A0SP-01A	TCGA-A2-A04Q-01A	TCGA-A2-A04T-01A	TCGA-A2-A0D2-01A	TCGA-A2-A0ST-01A	TCGA-A2-A0SX-01A	TCGA-A2-A0T0-01A	TCGA-A2-A0YE-01A	TCGA-A2-A0YM-01A	TCGA-A2-A1G1-01A	TCGA-A2-A25F-01A	TCGA-A2-A3XS-01A	TCGA-A2-A3XU-01A	TCGA-A2-A3XY-01A	TCGA-A2-A4RX-01A	TCGA-A2-A4S1-01A	TCGA-A7-A13D-01A	TCGA-A7-A13E-01A	TCGA-A7-A26G-01A	TCGA-A7-A4SE-01A	TCGA-A7-A5ZV-01A	TCGA-A7-A6VW-01A	TCGA-A7-A6VY-01A	TCGA-A8-A07C-01A	TCGA-A8-A07O-01A	TCGA-A8-A07U-01A	TCGA-A8-A08R-01A	TCGA-AC-A2BK-01A	TCGA-AC-A62X-01A	TCGA-AN-A04D-01A	TCGA-AN-A0AL-01A	TCGA-AN-A0FL-01A	TCGA-AN-A0FX-01A	TCGA-AN-A0G0-01A	TCGA-AN-A0XU-01A	TCGA-AO-A0J4-01A	TCGA-AO-A0J6-01A	TCGA-AO-A0JL-01A	TCGA-AO-A124-01A	TCGA-AO-A128-01A	TCGA-AO-A129-01A	TCGA-AO-A1KR-01A	TCGA-AR-A0TP-01A	TCGA-AR-A0TS-01A	TCGA-AR-A0TU-01A	TCGA-AR-A0U0-01A	TCGA-AR-A0U4-01A
	MODEL1707111420	MODEL1707111423	MODEL1707111424	MODEL1707111427	MODEL1707111429	MODEL1707111447	MODEL1707111461	MODEL1707111465	MODEL1707111467	MODEL1707111476	MODEL1707111482	MODEL1707111488	MODEL1707111495	MODEL1707111498	MODEL1707111499	MODEL1707111502	MODEL1707111505	MODEL1707111507	MODEL1707111671	MODEL1707111672	MODEL1707111678	MODEL1707111692	MODEL1707111695	MODEL1707111697	MODEL1707111699	MODEL1707111711	MODEL1707111716	MODEL1707111719	MODEL1707111733	MODEL1707111902	MODEL1707111928	MODEL1707112096	MODEL1707112098	MODEL1707112104	MODEL1707112109	MODEL1707112112	MODEL1707112118	MODEL1707112130	MODEL1707112132	MODEL1707112144	MODEL1707112145	MODEL1707112148	MODEL1707112149	MODEL1707112159	MODEL1707112203	MODEL1707112205	MODEL1707112207	MODEL1707112213	MODEL1707112216
(10Z)-heptadecenoic acid	1	1	1	1	1	1	1	1	1	1	1	1	1	1	1	1	1	1	1	1	1	1	1	1	1	1	1	1	1	1	1	1	1	1	1	1	1	1	1	1	1	1	1	1	1	1	1	1	1
(10Z)-heptadecenoyl-CoA	1	1	1	1	1	1	1	1	1	1	1	1	1	1	1	1	1	1	1	1	1	1	1	1	1	1	1	1	1	1	1	1	1	1	1	1	1	1	1	1	1	1	1	1	1	1	1	1	1
(11Z)-docosenoyl-CoA	1	1	1	1	1	1	1	1	1	1	1	1	1	1	1	1	1	1	1	1	1	1	1	1	1	1	1	1	1	1	1	1	1	1	1	1	1	1	1	1	1	1	1	1	1	1	1	1	1
(11Z)-eicosenoyl-CoA	1	1	1	1	1	1	1	1	1	1	1	1	1	1	1	1	1	1	1	1	1	1	1	1	1	1	1	1	1	1	1	1	1	1	1	1	1	1	1	1	1	1	1	1	1	1	1	1	1
(11Z,14Z)-eicosadienoic acid	1	1	1	1	1	1	1	1	1	1	1	1	1	1	1	1	1	1	1	1	1	1	1	1	1	1	1	1	1	1	1	1	1	1	1	1	1	1	1	1	1	1	1	1	1	1	1	1	1
(11Z,14Z)-eicosadienoyl-CoA	1	1	1	1	1	1	1	1	1	1	1	1	1	1	1	1	1	1	1	1	1	1	1	1	1	1	1	1	1	1	1	1	1	1	1	1	1	1	1	1	1	1	1	1	1	1	1	1	1
(11Z,14Z,17Z)-eicosatrienoic acid	1	1	1	1	1	1	1	1	1	1	1	1	1	1	1	1	1	1	1	1	1	1	1	1	1	1	1	1	1	1	1	1	1	1	1	1	1	1	1	1	1	1	1	1	1	1	1	1	1
(11Z,14Z,17Z)-eicosatrienoyl-CoA	1	1	1	1	1	1	1	1	1	1	1	1	1	1	1	1	1	1	1	1	1	1	1	1	1	1	1	1	1	1	1	1	1	1	1	1	1	1	1	1	1	1	1	1	1	1	1	1	1
(11Z,14Z,17Z)-eicosatrienoylcarnitine	1	1	1	1	1	1	1	1	1	1	1	1	1	1	1	1	1	1	1	1	0	1	1	1	1	1	1	1	1	1	1	1	1	1	1	1	1	1	1	1	1	1	1	1	1	1	1	1	1
(13Z)-docosenoyl-CoA	1	1	1	1	1	1	1	1	1	1	1	1	1	1	1	1	1	1	1	1	1	1	1	1	1	1	1	1	1	1	1	1	1	1	1	1	1	1	1	1	1	1	1	1	1	1	1	1	1
(13Z)-eicosenoic acid	1	1	1	1	1	1	1	1	1	1	1	1	1	1	1	1	1	1	1	1	1	1	1	1	1	1	1	1	1	1	1	1	1	1	1	1	1	1	1	1	1	1	1	1	1	1	1	1	1
(13Z)-eicosenoyl-CoA	1	1	1	1	1	1	1	1	1	1	1	1	1	1	1	1	1	1	1	1	1	1	1	1	1	1	1	1	1	1	1	1	1	1	1	1	1	1	1	1	1	1	1	1	1	1	1	1	1
(13Z)-octadecenoic acid	1	1	1	1	1	1	1	1	1	1	1	1	1	1	1	1	1	1	1	1	1	1	1	1	1	1	1	1	1	1	1	1	1	1	1	1	1	1	1	1	1	1	1	1	1	1	1	1	1
(13Z)-octadecenoyl-CoA	1	1	1	1	1	1	1	1	1	1	1	1	1	1	1	1	1	1	1	1	1	1	1	1	1	1	1	1	1	1	1	1	1	1	1	1	1	1	1	1	1	1	1	1	1	1	1	1	1
(13Z,16Z)-docosadienoic acid	1	1	1	1	1	1	1	1	1	1	1	1	1	1	1	1	1	1	1	1	1	1	1	1	1	1	1	1	1	1	1	1	1	1	1	1	1	1	1	1	1	1	1	1	1	1	1	1	1
(13Z,16Z)-docosadienoyl-CoA	1	1	1	1	1	1	1	1	1	1	1	1	1	1	1	1	1	1	1	1	1	1	1	1	1	1	1	1	1	1	1	1	1	1	1	1	1	1	1	1	1	1	1	1	1	1	1	1	1
(13Z,16Z)-docosadienoylcarnitine	1	1	1	1	1	1	1	1	1	1	1	1	1	1	1	1	1	1	1	1	0	1	1	1	1	1	1	1	1	1	1	1	1	1	1	1	1	1	1	1	1	1	1	1	1	1	1	1	1
(15Z)-tetracosenoyl-CoA	1	1	1	1	1	1	1	1	1	1	1	1	1	1	1	1	1	1	1	1	1	1	1	1	1	1	1	1	1	1	1	1	1	1	1	1	1	1	1	1	1	1	1	1	1	1	1	1	1
(15Z)-tetracosenoylcarnitine	1	1	1	1	1	1	1	1	1	1	1	1	1	1	1	1	1	1	1	1	0	1	1	1	1	1	1	1	1	1	1	1	1	1	1	1	1	1	1	1	1	1	1	1	1	1	1	1	1
(2E)-decenoyl-CoA	1	1	1	1	1	1	1	1	1	1	1	1	1	1	1	1	1	1	1	1	1	1	1	1	1	1	1	1	1	1	1	1	1	1	1	1	1	1	1	1	1	1	1	1	1	1	1	1	1
(2E)-docosenoyl-CoA	1	1	1	1	1	1	1	1	1	1	1	1	1	1	1	1	1	1	1	1	1	1	1	1	1	1	1	1	1	1	1	1	1	1	1	1	1	1	1	1	1	1	1	1	1	1	1	1	1
(2E)-dodecenoyl-CoA	1	1	1	1	1	1	1	1	1	1	1	1	1	1	1	1	1	1	1	1	1	1	1	1	1	1	1	1	1	1	1	1	1	1	1	1	1	1	1	1	1	1	1	1	1	1	1	1	1
(2E)-eicosenoyl-CoA	1	1	1	1	1	0	1	1	1	1	1	1	1	1	1	1	1	1	1	1	0	1	1	1	1	1	1	1	1	1	1	1	1	1	1	1	1	0	1	1	1	1	1	1	1	1	1	0	1
(2E)-heneicosenoyl-CoA	0	0	0	1	1	1	1	1	1	0	1	0	0	1	1	1	0	0	0	1	1	1	0	1	0	1	1	0	0	0	0	0	0	0	1	1	1	1	0	0	1	1	1	1	0	1	1	1	0
(2E)-heptadecenoyl-CoA	0	0	0	0	0	0	0	0	0	0	0	0	0	0	0	0	0	0	0	0	0	0	0	0	1	0	0	0	0	0	1	0	0	0	0	0	0	1	0	0	0	0	0	1	0	0	0	0	0
(2E)-heptadecenoyl-[ACP]	0	0	0	0	0	0	0	0	0	0	0	0	0	0	0	0	0	0	0	0	0	0	0	1	0	0	0	0	0	0	0	0	0	0	0	0	0	0	0	0	0	0	0	1	0	0	0	0	0
(2E)-heptenoyl-CoA	1	1	1	1	1	1	1	1	1	1	1	1	1	1	1	1	1	1	1	1	1	1	1	0	1	1	1	1	1	1	1	1	1	1	1	1	1	1	1	1	1	1	1	1	1	1	1	1	1
(2E)-heptenoyl-[ACP]	0	0	0	0	0	0	0	0	0	0	0	0	0	0	0	0	0	0	0	0	0	0	0	1	0	0	0	0	0	0	0	0	0	0	0	0	0	0	0	0	0	0	0	1	0	0	0	0	0
(2E)-hexacosenoyl-CoA	1	1	1	1	1	1	1	1	0	1	1	1	1	1	1	1	1	1	1	1	1	1	1	1	1	1	1	1	1	1	1	1	1	1	1	1	1	1	1	1	1	1	1	1	1	0	1	1	1
(2E)-hexadecenoyl-CoA	1	1	1	1	1	0	0	1	1	1	1	1	1	0	1	1	1	1	1	1	0	1	1	0	1	1	1	1	1	1	1	1	1	1	1	1	1	0	1	1	1	1	1	1	1	0	1	0	1
(2E)-hexenoyl-CoA	1	1	1	1	1	1	1	1	1	1	1	1	1	1	1	1	1	1	1	1	1	1	1	1	1	1	1	1	1	1	1	1	1	1	1	1	1	1	1	1	1	1	1	1	1	1	1	1	1
(2E)-nonadecenoyl-CoA	0	0	0	1	1	1	1	1	1	1	1	0	0	1	1	1	0	0	0	1	1	1	0	1	0	1	1	1	0	0	0	0	0	0	1	0	0	1	0	0	1	1	1	1	1	1	1	1	0
(2E)-nonenoyl-CoA	1	1	1	1	1	1	1	1	1	1	1	1	1	1	1	1	1	1	1	1	1	1	1	0	1	1	1	1	1	1	1	1	1	1	1	1	1	1	1	1	1	1	1	1	1	1	1	1	1
(2E)-nonenoyl-[ACP]	0	0	0	0	0	0	0	0	0	0	0	0	0	0	0	0	0	0	0	0	0	0	0	1	0	0	0	0	0	0	0	0	0	0	0	0	0	0	0	0	0	0	0	1	0	0	0	0	0
(2E)-octadecenoyl-CoA	1	1	1	1	1	0	1	1	1	1	1	1	1	1	1	1	1	1	1	1	1	1	1	1	1	1	1	1	1	1	1	1	1	1	1	1	1	1	1	1	1	1	1	1	1	0	1	1	1
(2E)-octenoyl-CoA	1	1	1	1	1	1	1	1	1	1	1	1	1	1	1	1	1	1	1	1	1	1	1	1	1	1	1	1	1	1	1	1	1	1	1	1	1	1	1	1	1	1	1	1	1	1	1	1	1
(2E)-pentadecenoyl-CoA	1	1	1	1	1	1	1	1	1	1	1	1	1	1	1	1	1	1	1	1	1	1	1	1	1	1	1	1	1	1	1	1	1	1	1	1	1	1	1	1	1	1	1	1	1	1	1	1	1
(2E)-pentadecenoyl-[ACP]	0	0	0	0	0	0	0	0	0	0	0	0	0	0	0	0	0	0	0	0	0	0	0	1	0	0	0	0	0	0	0	0	0	0	0	0	0	0	0	0	0	0	0	1	0	0	0	0	0
(2E)-pentenoyl-CoA	1	1	1	1	1	1	1	1	1	1	1	1	1	1	1	1	1	1	1	1	1	1	1	0	1	1	1	1	1	1	1	1	1	1	1	1	1	1	1	1	1	1	1	1	1	1	1	1	1
(2E)-pentenoyl-[ACP]	0	0	0	0	0	0	0	0	0	0	0	0	0	0	0	0	0	0	0	0	0	0	0	1	0	0	0	0	0	0	0	0	0	0	0	0	0	0	0	0	0	0	0	1	0	0	0	0	0
(2E)-tetracosenoyl-CoA	1	1	1	1	1	0	1	1	1	1	1	1	1	0	1	1	1	1	1	1	0	1	1	1	1	1	1	1	1	1	1	1	1	1	1	1	1	0	1	1	1	1	1	1	1	0	1	0	1
(2E)-tetradecenoyl-CoA	1	1	1	1	1	0	0	1	1	1	1	1	1	0	1	1	1	1	1	1	0	1	1	1	1	1	1	1	1	1	1	1	1	1	1	1	1	0	1	1	1	1	1	1	1	0	1	1	1
(2E)-tricosenoyl-CoA	0	0	0	0	0	1	0	0	1	1	0	0	0	1	0	0	0	0	0	0	1	0	0	1	0	0	0	1	0	0	0	0	0	0	0	1	1	1	0	0	0	0	0	0	1	1	0	1	0
(2E)-tridecenoyl-CoA	1	1	1	1	1	1	1	1	1	1	1	1	1	1	1	1	1	1	1	1	1	1	1	0	1	1	1	1	1	1	1	1	1	1	1	1	1	1	1	1	1	1	1	1	1	1	1	1	1
(2E)-tridecenoyl-[ACP]	0	0	0	0	0	0	0	0	0	0	0	0	0	0	0	0	0	0	0	0	0	0	0	1	0	0	0	0	0	0	0	0	0	0	0	0	0	0	0	0	0	0	0	1	0	0	0	0	0
(2E)-undecenoyl-CoA	1	1	1	1	1	1	1	1	1	1	1	1	1	1	1	1	1	1	1	1	1	1	1	0	1	1	1	1	1	1	1	1	1	1	1	1	1	1	1	1	1	1	1	1	1	1	1	1	1
(2E)-undecenoyl-[ACP]	0	0	0	0	0	0	0	0	0	0	0	0	0	0	0	0	0	0	0	0	0	0	0	1	0	0	0	0	0	0	0	0	0	0	0	0	0	0	0	0	0	0	0	1	0	0	0	0	0
(2E,4Z,7Z,10Z)-hexadecatetraenoyl-CoA	1	0	0	1	0	1	1	1	1	1	1	1	0	1	1	1	1	0	1	0	0	0	0	0	0	1	1	1	1	1	1	0	1	1	1	1	0	0	0	1	0	0	1	1	1	1	1	0	0
(2E,6Z,9Z,12Z)-octadecatetraenoyl-CoA	1	0	0	1	0	1	1	1	1	1	1	1	0	1	1	1	1	0	1	0	0	0	0	0	0	1	1	1	1	1	1	0	1	1	1	1	0	0	0	1	0	0	1	1	1	1	1	0	0
(2E,7Z,10Z,13Z,16Z)-docosapentaenoyl-CoA	0	1	1	0	1	0	0	1	1	0	0	0	0	1	0	0	0	0	0	1	1	1	0	1	1	1	0	0	0	0	0	0	0	0	0	0	1	1	1	0	1	1	1	1	0	1	0	1	1
(3S)-3-hydroxy-cis,cis-palmito-7,10-dienoyl-CoA	1	0	0	1	0	1	1	1	1	1	1	1	0	1	1	1	1	0	1	1	1	0	0	0	0	1	1	1	1	1	1	0	1	1	1	1	0	0	0	1	0	0	1	1	1	1	1	0	0
(3S)-3-hydroxydodec-cis-6-enoyl-CoA	1	0	0	1	0	1	1	1	1	1	1	1	0	1	1	1	1	0	1	1	1	0	0	0	0	1	1	1	1	1	1	0	1	1	1	1	0	0	0	1	0	0	1	1	1	1	1	0	0
(3S)-hydroxy-docasa-cis,cis-13,16-dienoyl-CoA	1	0	0	1	1	1	1	1	1	0	1	0	1	1	1	1	1	1	1	1	1	1	1	1	1	1	1	1	1	1	1	1	1	1	1	1	0	1	0	1	0	0	1	1	0	1	1	1	0
(3S)-hydroxy-eicosa-cis,cis,cis-11,14,17-trienoyl-CoA	0	0	0	0	0	0	0	0	0	0	0	0	0	0	0	0	0	0	0	0	0	0	0	1	0	0	0	0	0	0	0	0	0	0	0	0	0	0	0	0	0	0	0	1	0	0	0	0	0
(3S)-hydroxy-eicosa-cis,cis-11,14-dienoyl-CoA	0	0	0	0	0	0	0	0	1	0	0	0	0	1	0	0	0	0	0	0	0	0	0	1	0	0	0	1	0	0	0	0	0	0	0	1	0	0	0	0	0	0	0	1	1	0	0	1	1
(3Z)-dodecenoyl-CoA	1	1	1	1	1	1	1	1	1	1	1	1	1	1	1	1	1	1	1	1	1	1	1	1	1	1	1	1	1	1	1	1	1	1	1	1	1	1	1	1	1	1	1	1	1	1	1	1	1
(3Z,7Z,10Z)-hexadecatrienoyl-CoA	1	0	0	1	0	1	1	1	1	1	1	1	0	1	1	1	1	0	1	0	0	0	0	0	0	1	1	1	1	1	1	0	1	1	1	1	0	0	0	1	0	0	1	1	1	1	1	0	0
(4Z,7Z,10Z)-hexadecatrienoyl-CoA	1	0	0	1	0	1	1	1	1	1	1	1	0	1	1	1	1	0	1	0	0	0	0	1	0	1	1	1	1	1	1	0	1	1	1	1	0	0	0	1	0	0	1	1	1	1	1	0	0
(4Z,7Z,10Z,13Z,16Z)-DPA	1	1	1	1	1	1	1	1	1	1	1	1	1	1	1	1	1	1	1	1	1	1	1	1	1	1	1	1	1	1	1	1	1	1	1	1	1	1	1	1	1	1	1	1	1	1	1	1	1
(4Z,7Z,10Z,13Z,16Z)-docosapentaenoyl-CoA	1	1	1	1	1	1	1	1	1	1	1	1	1	1	1	1	1	1	1	1	1	1	1	1	1	1	1	1	1	1	1	1	1	1	1	1	1	1	1	1	1	1	1	1	1	1	1	1	1
(4Z,7Z,10Z,13Z,16Z)-docosapentaenoylcarnitine	1	1	1	1	1	1	1	1	1	1	1	1	1	1	1	1	1	1	1	1	1	1	1	1	1	1	1	1	1	1	1	1	1	1	1	1	1	1	1	1	1	1	1	1	1	1	1	1	1
(4Z,7Z,10Z,13Z,16Z,19Z)-docosahexaenoyl-CoA	1	1	1	1	1	1	1	1	1	1	1	1	1	1	1	1	1	1	1	1	1	1	1	1	1	1	1	1	1	1	1	1	1	1	1	1	1	1	1	1	1	1	1	1	1	1	1	1	1
(5Z)-dodecenoyl-CoA	1	1	1	1	1	1	1	1	1	1	1	1	1	1	1	1	1	1	1	1	1	1	1	1	1	1	1	1	1	1	1	1	1	1	1	1	1	1	1	1	1	1	1	1	1	1	1	1	1
(5Z,8Z,11Z)-eicosatrienoyl-CoA	1	1	1	1	1	1	1	1	1	1	1	1	1	1	1	1	1	1	1	1	1	1	1	1	1	1	1	1	1	1	1	1	1	1	1	1	1	1	1	1	1	1	1	1	1	1	1	1	1
(5Z,8Z,11Z)-eicosatrienoylcarnitine	1	1	1	1	1	1	1	1	1	1	1	1	1	1	1	1	1	1	1	1	0	1	1	1	1	1	1	1	1	1	1	1	1	1	1	1	1	1	1	1	1	1	1	1	1	1	1	1	1
(5Z,8Z,11Z,14Z,17Z)-eicosapentaenoylcarnitine	0	0	1	1	1	1	1	0	0	0	0	0	0	1	1	1	1	0	1	0	1	1	1	1	0	0	0	0	0	0	1	1	1	0	1	0	1	0	1	1	1	1	0	1	0	1	1	1	1
(6Z,9Z)-octadecadienoic acid	1	1	1	1	1	1	1	1	1	1	1	1	1	1	1	1	1	1	1	1	1	1	1	1	1	1	1	1	1	1	1	1	1	1	1	1	1	1	1	1	1	1	1	1	1	1	1	1	1
(6Z,9Z)-octadecadienoyl-CoA	1	1	1	1	1	1	1	1	1	1	1	1	1	1	1	1	1	1	1	1	1	1	1	1	1	1	1	1	1	1	1	1	1	1	1	1	1	1	1	1	1	1	1	1	1	1	1	1	1
(6Z,9Z)-octadecadienoylcarnitine	1	1	1	1	1	1	1	1	1	1	1	1	1	1	1	1	1	1	1	1	0	1	1	1	1	1	1	1	1	1	1	1	1	1	1	1	1	1	1	1	1	1	1	1	1	1	1	1	1
(6Z,9Z,12Z,15Z)-octadecatetraenoyl-CoA	1	1	1	1	1	1	1	1	1	1	1	1	1	1	1	1	1	1	1	1	1	1	1	1	1	1	1	1	1	1	1	1	1	1	1	1	1	1	1	1	1	1	1	1	1	1	1	1	1
(6Z,9Z,12Z,15Z)-octadecatetraenoylcarnitine	1	1	1	1	1	1	1	1	1	1	1	1	1	1	1	1	1	1	1	1	1	1	1	1	1	1	1	1	1	1	1	1	1	1	1	1	1	1	1	1	1	1	1	1	1	1	1	1	1
(6Z,9Z,12Z,15Z,18Z)-TPA	1	1	1	1	1	1	1	1	1	1	1	1	1	1	1	1	1	1	1	1	1	1	1	1	1	1	1	1	1	1	1	1	1	1	1	1	1	1	1	1	1	1	1	1	1	1	1	1	1
(6Z,9Z,12Z,15Z,18Z)-tetracosapentaenoyl-CoA	1	1	1	1	1	1	1	1	1	1	1	1	1	1	1	1	1	1	1	1	1	1	1	1	1	1	1	1	1	1	1	1	1	1	1	1	1	1	1	1	1	1	1	1	1	1	1	1	1
(6Z,9Z,12Z,15Z,18Z)-tetracosapentaenoylcarnitine	1	1	1	1	1	1	1	1	1	1	1	1	1	1	1	1	1	1	1	1	0	1	1	1	1	1	1	1	1	1	1	1	1	1	1	1	1	1	1	1	1	1	1	1	1	1	1	1	1
(6Z,9Z,12Z,15Z,18Z,21Z)-THA	1	1	1	1	1	1	1	1	1	1	1	1	1	1	1	1	1	1	1	1	1	1	1	1	1	1	1	1	1	1	1	1	1	1	1	1	1	1	1	1	1	1	1	1	1	1	1	1	1
(6Z,9Z,12Z,15Z,18Z,21Z)-tetracosahexaenoyl-CoA	1	1	1	1	1	1	1	1	1	1	1	1	1	1	1	1	1	1	1	1	1	1	1	1	1	1	1	1	1	1	1	1	1	1	1	1	1	1	1	1	1	1	1	1	1	1	1	1	1
(6Z,9Z,12Z,15Z,18Z,21Z)-tetracosahexaenoylcarnitine	1	1	1	1	1	1	1	1	1	1	1	1	1	1	1	1	1	1	1	1	0	1	1	1	1	1	1	1	1	1	1	1	1	1	1	1	1	1	1	1	1	1	1	1	1	1	1	1	1
(7Z)-octadecenoic acid	1	1	1	1	1	1	1	1	1	1	1	1	1	1	1	1	1	1	1	1	1	1	1	1	1	1	1	1	1	1	1	1	1	1	1	1	1	1	1	1	1	1	1	1	1	1	1	1	1
(7Z)-octadecenoyl-CoA	1	1	1	1	1	1	1	1	1	1	1	1	1	1	1	1	1	1	1	1	1	1	1	1	1	1	1	1	1	1	1	1	1	1	1	1	1	1	1	1	1	1	1	1	1	1	1	1	1
(7Z)-tetradecenoic acid	1	1	1	1	1	1	1	1	1	1	1	1	1	1	1	1	1	1	1	1	1	1	1	1	1	1	1	1	1	1	1	1	1	1	1	1	1	1	1	1	1	1	1	1	1	1	1	1	1
(7Z)-tetradecenoyl-CoA	1	1	1	1	1	1	1	1	1	1	1	1	1	1	1	1	1	1	1	1	1	1	1	1	1	1	1	1	1	1	1	1	1	1	1	1	1	1	1	1	1	1	1	1	1	1	1	1	1
(7Z,10Z,13Z,16Z)-docosatetraenoyl-CoA	1	1	1	1	1	1	1	1	1	1	1	1	1	1	1	1	1	1	1	1	1	1	1	1	1	1	1	1	1	1	1	1	1	1	1	1	1	1	1	1	1	1	1	1	1	1	1	1	1
(7Z,10Z,13Z,16Z,19Z)-docosapentaenoyl-CoA	1	1	1	1	1	1	1	1	1	1	1	1	1	1	1	1	1	1	1	1	1	1	1	1	1	1	1	1	1	1	1	1	1	1	1	1	1	1	1	1	1	1	1	1	1	1	1	1	1
(7Z,10Z,13Z,16Z,19Z)-docosapentaenoylcarnitine	1	1	1	1	1	1	1	1	1	1	1	1	1	1	1	1	1	1	1	1	1	1	1	1	1	1	1	1	1	1	1	1	1	1	1	1	1	1	1	1	1	1	1	1	1	1	1	1	1
(8Z,11Z)-eicosadienoyl-CoA	1	1	1	1	1	1	1	1	1	1	1	1	1	1	1	1	1	1	1	1	1	1	1	1	1	1	1	1	1	1	1	1	1	1	1	1	1	1	1	1	1	1	1	1	1	1	1	1	1
(8Z,11Z)-eicosadienoylcarnitine	1	1	1	1	1	1	1	1	1	1	1	1	1	1	1	1	1	1	1	1	0	1	1	1	1	1	1	1	1	1	1	1	1	1	1	1	1	1	1	1	1	1	1	1	1	1	1	1	1
(8Z,11Z,14Z,17Z)-eicosatetraenoyl-CoA	1	1	1	1	1	1	1	1	1	1	1	1	1	1	1	1	1	1	1	1	1	1	1	1	1	1	1	1	1	1	1	1	1	1	1	1	1	1	1	1	1	1	1	1	1	1	1	1	1
(8Z,11Z,14Z,17Z)-eicosatetraenoylcarnitine	1	1	1	1	1	1	1	1	1	1	1	1	0	1	1	1	1	1	1	1	1	1	1	1	1	1	1	1	1	0	1	1	1	1	1	1	1	1	0	1	1	1	1	1	1	1	1	1	1
(9E)-octadecenoyl-CoA	1	1	1	1	1	1	1	1	1	1	1	1	1	1	1	1	1	1	1	1	1	1	1	1	1	1	1	1	1	1	1	1	1	1	1	1	1	1	1	1	1	1	1	1	1	1	1	1	1
(9E)-octadecenoylcarnitine	1	1	1	1	1	1	1	1	1	1	1	1	1	1	1	1	1	1	1	1	0	1	1	1	1	1	1	1	1	1	1	1	1	1	1	1	1	1	1	1	1	1	1	1	1	1	1	1	1
(9E)-tetradecenoic acid	1	1	1	1	1	1	1	1	1	1	1	1	1	1	1	1	1	1	1	1	1	1	1	1	1	1	1	1	1	1	1	1	1	1	1	1	1	1	1	1	1	1	1	1	1	1	1	1	1
(9E)-tetradecenoyl-CoA	1	1	1	1	1	1	1	1	1	1	1	1	1	1	1	1	1	1	1	1	1	1	1	1	1	1	1	1	1	1	1	1	1	1	1	1	1	1	1	1	1	1	1	1	1	1	1	1	1
(9Z,12Z,15Z,18Z)-TTA	1	1	1	1	1	1	1	1	1	1	1	1	1	1	1	1	1	1	1	1	1	1	1	1	1	1	1	1	1	1	1	1	1	1	1	1	1	1	1	1	1	1	1	1	1	1	1	1	1
(9Z,12Z,15Z,18Z)-tetracosatetraenoyl-CoA	1	1	1	1	1	1	1	1	1	1	1	1	1	1	1	1	1	1	1	1	1	1	1	1	1	1	1	1	1	1	1	1	1	1	1	1	1	1	1	1	1	1	1	1	1	1	1	1	1
(9Z,12Z,15Z,18Z)-tetracosatetraenoylcarnitine	1	1	1	1	1	1	1	1	1	1	1	1	1	1	1	1	1	1	1	1	0	1	1	1	1	1	1	1	1	1	1	1	1	1	1	1	1	1	1	1	1	1	1	1	1	1	1	1	1
(9Z,12Z,15Z,18Z,21Z)-TPA	1	1	1	1	1	1	1	1	1	1	1	1	1	1	1	1	1	1	1	1	1	1	1	1	1	1	1	1	1	1	1	1	1	1	1	1	1	1	1	1	1	1	1	1	1	1	1	1	1
(9Z,12Z,15Z,18Z,21Z)-tetracosapentaenoyl-CoA	1	1	1	1	1	1	1	1	1	1	1	1	1	1	1	1	1	1	1	1	1	1	1	1	1	1	1	1	1	1	1	1	1	1	1	1	1	1	1	1	1	1	1	1	1	1	1	1	1
(9Z,12Z,15Z,18Z,21Z)-tetracosapentaenoylcarnitine	1	1	1	1	1	1	1	1	1	1	1	1	1	1	1	1	1	1	1	1	0	1	1	1	1	1	1	1	1	1	1	1	1	1	1	1	1	1	1	1	1	1	1	1	1	1	1	1	1
(R)-5-diphosphomevalonate	1	1	1	1	1	1	1	1	1	1	1	1	1	1	1	1	1	1	1	1	1	1	1	1	1	1	1	1	1	1	1	1	1	1	1	1	1	1	1	1	1	1	1	1	1	1	1	1	1
(R)-5-phosphomevalonate	1	1	1	1	1	1	1	1	1	1	1	1	1	1	1	1	1	1	1	1	1	1	1	1	1	1	1	1	1	1	1	1	1	1	1	1	1	1	1	1	1	1	1	1	1	1	1	1	1
(R)-methylmalonyl-CoA	0	1	1	0	0	0	1	1	0	1	0	1	0	1	0	1	1	0	0	0	0	0	0	1	0	0	1	1	1	0	1	0	0	0	0	1	1	0	1	0	1	1	1	1	1	0	0	0	1
(R)-mevalonate	1	1	1	1	1	1	1	1	1	1	1	1	1	1	1	1	1	1	1	1	1	1	1	1	1	1	1	1	1	1	1	1	1	1	1	1	1	1	1	1	1	1	1	1	1	1	1	1	1
(S)-3-hydroxy-11-cis-octadecenoyl-CoA	1	0	0	0	1	0	0	1	0	1	1	1	1	0	0	0	0	0	0	1	0	0	1	1	0	1	1	1	0	1	0	1	1	1	0	1	1	0	0	1	1	0	1	1	1	0	0	0	0
(S)-3-hydroxy-2-methylbutyryl-CoA	0	0	0	0	0	0	0	0	0	0	0	0	0	0	0	0	0	0	0	0	0	0	0	1	0	0	0	0	0	0	0	0	0	0	0	0	0	0	1	0	0	0	0	0	0	0	0	0	0
(S)-3-hydroxy-7-hexadecenoyl-CoA	1	1	1	1	1	1	1	1	1	1	1	1	1	1	1	1	1	1	1	1	1	1	1	1	1	1	1	1	1	1	1	1	1	1	1	1	1	1	1	1	1	1	1	1	1	1	1	1	1
(S)-3-hydroxybutyryl-CoA	1	1	1	1	1	1	1	1	1	1	1	1	1	1	1	1	1	1	1	1	1	1	1	1	1	1	1	1	1	1	1	1	1	1	1	1	1	1	1	1	1	1	1	1	1	1	1	1	1
(S)-3-hydroxydodecanoyl-CoA	1	1	1	1	1	1	1	1	1	1	1	1	1	1	1	1	1	1	1	1	1	1	1	1	1	1	1	1	1	1	1	1	1	1	1	1	1	1	1	1	1	1	1	1	1	1	1	1	1
(S)-3-hydroxyhexadecanoyl-CoA	1	1	1	1	1	0	0	1	1	1	1	1	1	0	1	1	1	1	1	1	0	1	1	0	1	1	1	1	1	1	1	1	1	1	1	1	1	0	1	1	1	1	1	1	1	0	1	0	1
(S)-3-hydroxyoleyleoyl-CoA	1	1	1	1	1	1	1	1	1	1	1	1	1	1	1	1	1	1	1	1	1	1	1	1	1	1	1	1	1	1	1	1	1	1	1	1	1	1	1	1	1	1	1	1	1	1	1	1	1
(S)-3-hydroxypalmitoleoyl-CoA	1	1	1	1	1	1	1	1	1	1	1	1	1	1	1	1	1	1	1	1	1	1	1	1	1	1	1	1	1	1	1	1	1	1	1	1	1	1	1	1	1	1	1	1	1	1	1	1	1
(S)-3-hydroxytetradecanoyl-CoA	1	1	1	1	1	0	0	1	1	1	1	1	1	0	1	1	1	1	1	1	0	1	1	1	1	1	1	1	1	1	1	1	1	1	1	1	1	0	1	1	1	1	1	1	1	0	1	1	1
(S)-dihydroorotate	1	1	1	1	1	1	1	1	1	1	1	1	1	1	1	1	1	1	1	1	1	1	1	1	1	1	1	1	1	1	1	1	1	1	1	1	1	1	1	1	1	1	1	1	1	1	1	1	1
(S)-hydroxydecanoyl-CoA	1	1	1	1	1	1	1	1	1	1	1	1	1	1	1	1	1	1	1	1	1	1	1	1	1	1	1	1	1	1	1	1	1	1	1	1	1	1	1	1	1	1	1	1	1	1	1	1	1
(S)-hydroxyhexanoyl-CoA	1	1	1	1	1	1	1	1	1	1	1	1	1	1	1	1	1	1	1	1	1	1	1	1	1	1	1	1	1	1	1	1	1	1	1	1	1	1	1	1	1	1	1	1	1	1	1	1	1
(S)-hydroxyoctanoyl-CoA	1	1	1	1	1	1	1	1	1	1	1	1	1	1	1	1	1	1	1	1	1	1	1	1	1	1	1	1	1	1	1	1	1	1	1	1	1	1	1	1	1	1	1	1	1	1	1	1	1
1,2-diacylglycerol-LD-PC pool	1	1	1	1	1	1	1	1	1	1	1	1	1	1	1	1	1	1	1	1	1	1	1	1	1	1	1	1	1	1	1	1	1	1	1	1	1	1	1	1	1	1	1	1	1	1	1	1	1
1,2-diacylglycerol-LD-PE pool	0	1	1	0	1	0	1	0	0	1	1	1	1	1	1	0	1	1	1	0	0	0	1	1	1	0	1	1	1	0	0	1	0	0	0	0	0	0	1	1	1	1	1	1	0	1	1	1	0
1,2-diacylglycerol-LD-PI pool	0	0	0	0	0	0	0	0	1	0	0	0	0	0	0	0	0	0	0	0	0	0	0	0	1	0	0	0	0	0	0	0	1	0	0	0	0	0	0	0	0	0	0	1	0	0	0	0	0
1,2-diacylglycerol-LD-PS pool	1	1	1	1	1	1	1	1	1	1	1	1	1	1	1	1	1	1	1	1	1	1	1	1	1	1	1	1	1	1	1	1	1	1	1	1	1	1	1	1	1	1	1	1	1	1	1	1	1
1,2-diacylglycerol-LD-SM pool	1	0	0	0	0	0	1	0	0	0	1	1	0	0	0	0	0	0	1	1	1	1	0	0	0	0	1	0	0	0	1	1	0	0	0	0	0	1	0	0	0	0	0	1	0	0	0	1	0
1,2-diacylglycerol-LD-TAG pool	1	1	1	1	1	1	1	1	1	1	1	1	1	1	1	1	1	1	1	1	1	1	1	1	1	1	1	1	1	1	1	1	1	1	1	1	1	1	1	1	1	1	1	1	1	1	1	1	1
1,2-dihydroxy-5-(methylthio)pent-1-en-3-one	0	0	0	0	0	0	0	0	0	0	0	0	0	0	0	0	0	0	1	0	0	0	0	0	0	0	0	0	0	0	0	0	0	0	0	0	0	0	0	0	0	0	0	1	0	0	0	0	0
1,3-bisphospho-D-glycerate	1	1	1	1	1	1	1	1	1	1	1	1	1	1	1	1	1	1	0	1	1	1	0	1	1	1	1	1	1	1	1	1	1	1	1	1	1	1	1	1	1	1	1	1	1	1	1	1	1
1-acyl-PE pool	1	0	0	0	0	1	0	1	0	0	0	0	0	0	0	1	0	0	0	1	1	0	0	1	0	0	0	0	0	0	0	0	0	0	0	1	1	0	0	0	0	0	0	1	1	0	0	0	1
1-acylglycerol-3P-10,13,16,19-doco	1	1	1	1	1	1	1	1	1	1	1	1	1	1	1	1	1	1	1	1	1	1	1	1	1	1	1	1	1	1	1	1	1	1	1	1	1	1	1	1	1	1	1	1	1	1	1	1	1
1-acylglycerol-3P-10,13,16-docosa	1	1	1	1	1	1	1	1	1	1	1	1	1	1	1	1	1	1	1	1	1	1	1	1	1	1	1	1	1	1	1	1	1	1	1	1	1	1	1	1	1	1	1	1	1	1	1	1	1
1-acylglycerol-3P-10-heptade	1	1	1	1	1	1	1	1	1	1	1	1	1	1	1	1	1	1	1	1	1	1	1	1	1	1	1	1	1	1	1	1	1	1	1	1	1	1	1	1	1	1	1	1	1	1	1	1	1
1-acylglycerol-3P-11,14,17-eico	1	1	1	1	1	1	1	1	1	1	1	1	1	1	1	1	1	1	1	1	1	1	1	1	1	1	1	1	1	1	1	1	1	1	1	1	1	1	1	1	1	1	1	1	1	1	1	1	1
1-acylglycerol-3P-11,14-eicosa	1	1	1	1	1	1	1	1	1	1	1	1	1	1	1	1	1	1	1	1	1	1	1	1	1	1	1	1	1	1	1	1	1	1	1	1	1	1	1	1	1	1	1	1	1	1	1	1	1
1-acylglycerol-3P-11-docose	1	1	1	1	1	1	1	1	1	1	1	1	1	1	1	1	1	1	1	1	1	1	1	1	1	1	1	1	1	1	1	1	1	1	1	1	1	1	1	1	1	1	1	1	1	1	1	1	1
1-acylglycerol-3P-11-eico	1	1	1	1	1	1	1	1	1	1	1	1	1	1	1	1	1	1	1	1	1	1	1	1	1	1	1	1	1	1	1	1	1	1	1	1	1	1	1	1	1	1	1	1	1	1	1	1	1
1-acylglycerol-3P-12,15,18,21-tetra	1	1	1	1	1	1	1	1	1	1	1	1	1	1	1	1	1	1	1	1	1	1	1	1	1	1	1	1	1	1	1	1	1	1	1	1	1	1	1	1	1	1	1	1	1	1	1	1	1
1-acylglycerol-3P-13,16,19-doco	1	1	1	1	1	1	1	1	1	1	1	1	1	1	1	1	1	1	1	1	1	1	1	1	1	1	1	1	1	1	1	1	1	1	1	1	1	1	1	1	1	1	1	1	1	1	1	1	1
1-acylglycerol-3P-13,16-docosa	1	1	1	1	1	1	1	1	1	1	1	1	1	1	1	1	1	1	1	1	1	1	1	1	1	1	1	1	1	1	1	1	1	1	1	1	1	1	1	1	1	1	1	1	1	1	1	1	1
1-acylglycerol-3P-13-docose	1	1	1	1	1	1	1	1	1	1	1	1	1	1	1	1	1	1	1	1	1	1	1	1	1	1	1	1	1	1	1	1	1	1	1	1	1	1	1	1	1	1	1	1	1	1	1	1	1
1-acylglycerol-3P-13-eicose	1	1	1	1	1	1	1	1	1	1	1	1	1	1	1	1	1	1	1	1	1	1	1	1	1	1	1	1	1	1	1	1	1	1	1	1	1	1	1	1	1	1	1	1	1	1	1	1	1
1-acylglycerol-3P-13-octade	1	1	1	1	1	1	1	1	1	1	1	1	1	1	1	1	1	1	1	1	1	1	1	1	1	1	1	1	1	1	1	1	1	1	1	1	1	1	1	1	1	1	1	1	1	1	1	1	1
1-acylglycerol-3P-15-tetra	1	1	1	1	1	1	1	1	1	1	1	1	1	1	1	1	1	1	1	1	1	1	1	1	1	1	1	1	1	1	1	1	1	1	1	1	1	1	1	1	1	1	1	1	1	1	1	1	1
1-acylglycerol-3P-4,7,10,13,16,19-doco	1	1	1	1	1	1	1	1	1	1	1	1	1	1	1	1	1	1	1	1	1	1	1	1	1	1	1	1	1	1	1	1	1	1	1	1	1	1	1	1	1	1	1	1	1	1	1	1	1
1-acylglycerol-3P-4,7,10,13,16-docosa	1	1	1	1	1	1	1	1	1	1	1	1	1	1	1	1	1	1	1	1	1	1	1	1	1	1	1	1	1	1	1	1	1	1	1	1	1	1	1	1	1	1	1	1	1	1	1	1	1
1-acylglycerol-3P-5,8,11,14,17-eico	1	1	1	1	1	1	1	1	1	1	1	1	1	1	1	1	1	1	1	1	1	1	1	1	1	1	1	1	1	1	1	1	1	1	1	1	1	1	1	1	1	1	1	1	1	1	1	1	1
1-acylglycerol-3P-5,8,11-eico	1	1	1	1	1	1	1	1	1	1	1	1	1	1	1	1	1	1	1	1	1	1	1	1	1	1	1	1	1	1	1	1	1	1	1	1	1	1	1	1	1	1	1	1	1	1	1	1	1
1-acylglycerol-3P-5-tetrade	1	1	1	1	1	1	1	1	1	1	1	1	1	1	1	1	1	1	1	1	1	1	1	1	1	1	1	1	1	1	1	1	1	1	1	1	1	1	1	1	1	1	1	1	1	1	1	1	1
1-acylglycerol-3P-6,9,12,15,18,21-tetra	1	1	1	1	1	1	1	1	1	1	1	1	1	1	1	1	1	1	1	1	1	1	1	1	1	1	1	1	1	1	1	1	1	1	1	1	1	1	1	1	1	1	1	1	1	1	1	1	1
1-acylglycerol-3P-6,9,12,15,18-tetraco	1	1	1	1	1	1	1	1	1	1	1	1	1	1	1	1	1	1	1	1	1	1	1	1	1	1	1	1	1	1	1	1	1	1	1	1	1	1	1	1	1	1	1	1	1	1	1	1	1
1-acylglycerol-3P-6,9,12,15-octa	1	1	1	1	1	1	1	1	1	1	1	1	1	1	1	1	1	1	1	1	1	1	1	1	1	1	1	1	1	1	1	1	1	1	1	1	1	1	1	1	1	1	1	1	1	1	1	1	1
1-acylglycerol-3P-6,9-octa	1	1	1	1	1	1	1	1	1	1	1	1	1	1	1	1	1	1	1	1	1	1	1	1	1	1	1	1	1	1	1	1	1	1	1	1	1	1	1	1	1	1	1	1	1	1	1	1	1
1-acylglycerol-3P-7,10,13,16,19-docosa	1	1	1	1	1	1	1	1	1	1	1	1	1	1	1	1	1	1	1	1	1	1	1	1	1	1	1	1	1	1	1	1	1	1	1	1	1	1	1	1	1	1	1	1	1	1	1	1	1
1-acylglycerol-3P-7,10,13,16-docosa	1	1	1	1	1	1	1	1	1	1	1	1	1	1	1	1	1	1	1	1	1	1	1	1	1	1	1	1	1	1	1	1	1	1	1	1	1	1	1	1	1	1	1	1	1	1	1	1	1
1-acylglycerol-3P-7-hexade	1	1	1	1	1	1	1	1	1	1	1	1	1	1	1	1	1	1	1	1	1	1	1	1	1	1	1	1	1	1	1	1	1	1	1	1	1	1	1	1	1	1	1	1	1	1	1	1	1
1-acylglycerol-3P-7-octade	1	1	1	1	1	1	1	1	1	1	1	1	1	1	1	1	1	1	1	1	1	1	1	1	1	1	1	1	1	1	1	1	1	1	1	1	1	1	1	1	1	1	1	1	1	1	1	1	1
1-acylglycerol-3P-7-tetrade	1	1	1	1	1	1	1	1	1	1	1	1	1	1	1	1	1	1	1	1	1	1	1	1	1	1	1	1	1	1	1	1	1	1	1	1	1	1	1	1	1	1	1	1	1	1	1	1	1
1-acylglycerol-3P-8,11,14,17-eico	1	1	1	1	1	1	1	1	1	1	1	1	1	1	1	1	1	1	1	1	1	1	1	1	1	1	1	1	1	1	1	1	1	1	1	1	1	1	1	1	1	1	1	1	1	1	1	1	1
1-acylglycerol-3P-8,11-eico	1	1	1	1	1	1	1	1	1	1	1	1	1	1	1	1	1	1	1	1	1	1	1	1	1	1	1	1	1	1	1	1	1	1	1	1	1	1	1	1	1	1	1	1	1	1	1	1	1
1-acylglycerol-3P-9,12,15,18,21-tetra	1	1	1	1	1	1	1	1	1	1	1	1	1	1	1	1	1	1	1	1	1	1	1	1	1	1	1	1	1	1	1	1	1	1	1	1	1	1	1	1	1	1	1	1	1	1	1	1	1
1-acylglycerol-3P-9,12,15,18-tetraco	1	1	1	1	1	1	1	1	1	1	1	1	1	1	1	1	1	1	1	1	1	1	1	1	1	1	1	1	1	1	1	1	1	1	1	1	1	1	1	1	1	1	1	1	1	1	1	1	1
1-acylglycerol-3P-9-eicose	1	1	1	1	1	1	1	1	1	1	1	1	1	1	1	1	1	1	1	1	1	1	1	1	1	1	1	1	1	1	1	1	1	1	1	1	1	1	1	1	1	1	1	1	1	1	1	1	1
1-acylglycerol-3P-9-heptade	1	1	1	1	1	1	1	1	1	1	1	1	1	1	1	1	1	1	1	1	1	1	1	1	1	1	1	1	1	1	1	1	1	1	1	1	1	1	1	1	1	1	1	1	1	1	1	1	1
1-acylglycerol-3P-9-octade	1	1	1	1	1	1	1	1	1	1	1	1	1	1	1	1	1	1	1	1	1	1	1	1	1	1	1	1	1	1	1	1	1	1	1	1	1	1	1	1	1	1	1	1	1	1	1	1	1
1-acylglycerol-3P-9-tetrade	1	1	1	1	1	1	1	1	1	1	1	1	1	1	1	1	1	1	1	1	1	1	1	1	1	1	1	1	1	1	1	1	1	1	1	1	1	1	1	1	1	1	1	1	1	1	1	1	1
1-acylglycerol-3P-CL pool	1	1	1	1	1	1	1	1	1	1	1	1	1	1	1	1	1	1	1	1	1	1	1	1	1	1	1	1	1	1	1	1	1	1	1	1	1	1	1	1	1	1	1	1	1	1	1	1	1
1-acylglycerol-3P-LD-PC pool	1	1	1	1	1	1	1	1	1	1	1	1	1	1	1	1	1	1	1	1	1	1	1	1	1	1	1	1	1	1	1	1	1	1	1	1	1	1	1	1	1	1	1	1	1	1	1	1	1
1-acylglycerol-3P-LD-PE pool	0	0	1	0	1	0	0	0	0	0	1	1	0	0	1	0	1	0	1	0	0	0	1	1	0	0	0	1	1	0	0	0	0	0	0	0	0	0	1	1	1	1	1	0	0	1	1	0	0
1-acylglycerol-3P-LD-PI pool	1	1	1	1	1	1	1	1	1	1	1	1	1	1	1	1	1	1	1	1	1	1	1	1	1	1	1	1	1	1	1	1	1	1	1	1	1	1	1	1	1	1	1	1	1	1	1	1	1
1-acylglycerol-3P-LD-PS pool	0	0	0	1	1	0	0	1	0	1	0	0	0	1	0	0	0	1	0	1	1	1	0	1	1	1	1	0	0	1	0	1	1	1	0	1	0	1	0	1	0	0	1	0	1	0	0	1	0
1-acylglycerol-3P-LD-SM pool	1	0	0	0	0	0	1	0	0	0	1	1	0	0	0	0	0	0	1	1	1	1	0	0	0	0	1	0	0	0	1	1	0	0	0	0	0	1	0	0	0	0	0	1	0	0	0	1	0
1-acylglycerol-3P-LD-TG1 pool	1	1	1	1	1	1	1	1	1	1	1	1	1	1	1	1	1	1	1	1	1	1	1	1	1	1	1	1	1	1	1	1	1	1	1	1	1	1	1	1	1	1	1	1	1	1	1	1	1
1-acylglycerol-3P-arach	1	1	1	1	1	1	1	1	1	1	1	1	1	1	1	1	1	1	1	1	1	1	1	1	1	1	1	1	1	1	1	1	1	1	1	1	1	1	1	1	1	1	1	1	1	1	1	1	1
1-acylglycerol-3P-cis-vac	1	1	1	1	1	1	1	1	1	1	1	1	1	1	1	1	1	1	1	1	1	1	1	1	1	1	1	1	1	1	1	1	1	1	1	1	1	1	1	1	1	1	1	1	1	1	1	1	1
1-acylglycerol-3P-dihomo-gamma	1	1	1	1	1	1	1	1	1	1	1	1	1	1	1	1	1	1	1	1	1	1	1	1	1	1	1	1	1	1	1	1	1	1	1	1	1	1	1	1	1	1	1	1	1	1	1	1	1
1-acylglycerol-3P-docosa	1	1	1	1	1	1	1	1	1	1	1	1	1	1	1	1	1	1	1	1	1	1	1	1	1	1	1	1	1	1	1	1	1	1	1	1	1	1	1	1	1	1	1	1	1	1	1	1	1
1-acylglycerol-3P-eico	1	1	1	1	1	1	1	1	1	1	1	1	1	1	1	1	1	1	1	1	1	1	1	1	1	1	1	1	1	1	1	1	1	1	1	1	1	1	1	1	1	1	1	1	1	1	1	1	1
1-acylglycerol-3P-gamma-lin	1	1	1	1	1	1	1	1	1	1	1	1	1	1	1	1	1	1	1	1	1	1	1	1	1	1	1	1	1	1	1	1	1	1	1	1	1	1	1	1	1	1	1	1	1	1	1	1	1
1-acylglycerol-3P-heneico	1	1	1	1	1	1	1	1	1	1	1	1	1	1	1	1	1	1	1	1	1	1	1	1	1	1	1	1	1	1	1	1	1	1	1	1	1	1	1	1	1	1	1	1	1	1	1	1	1
1-acylglycerol-3P-heptade	1	1	1	1	1	1	1	1	1	1	1	1	1	1	1	1	1	1	1	1	1	1	1	1	1	1	1	1	1	1	1	1	1	1	1	1	1	1	1	1	1	1	1	1	1	1	1	1	1
1-acylglycerol-3P-hexacosa	1	1	1	1	1	1	1	1	1	1	1	1	1	1	1	1	1	1	1	1	1	1	1	1	1	1	1	1	1	1	1	1	1	1	1	1	1	1	1	1	1	1	1	1	1	1	1	1	1
1-acylglycerol-3P-hexecose	1	1	1	1	1	1	1	1	1	1	1	1	1	1	1	1	1	1	1	1	1	1	1	1	1	1	1	1	1	1	1	1	1	1	1	1	1	1	1	1	1	1	1	1	1	1	1	1	1
1-acylglycerol-3P-laur	1	1	1	1	1	1	1	1	1	1	1	1	1	1	1	1	1	1	1	1	1	1	1	1	1	1	1	1	1	1	1	1	1	1	1	1	1	1	1	1	1	1	1	1	1	1	1	1	1
1-acylglycerol-3P-lin	1	1	1	1	1	1	1	1	1	1	1	1	1	1	1	1	1	1	1	1	1	1	1	1	1	1	1	1	1	1	1	1	1	1	1	1	1	1	1	1	1	1	1	1	1	1	1	1	1
1-acylglycerol-3P-linolen	1	1	1	1	1	1	1	1	1	1	1	1	1	1	1	1	1	1	1	1	1	1	1	1	1	1	1	1	1	1	1	1	1	1	1	1	1	1	1	1	1	1	1	1	1	1	1	1	1
1-acylglycerol-3P-myrist	1	1	1	1	1	1	1	1	1	1	1	1	1	1	1	1	1	1	1	1	1	1	1	1	1	1	1	1	1	1	1	1	1	1	1	1	1	1	1	1	1	1	1	1	1	1	1	1	1
1-acylglycerol-3P-nanode	1	1	1	1	1	1	1	1	1	1	1	1	1	1	1	1	1	1	1	1	1	1	1	1	1	1	1	1	1	1	1	1	1	1	1	1	1	1	1	1	1	1	1	1	1	1	1	1	1
1-acylglycerol-3P-ol	1	1	1	1	1	1	1	1	1	1	1	1	1	1	1	1	1	1	1	1	1	1	1	1	1	1	1	1	1	1	1	1	1	1	1	1	1	1	1	1	1	1	1	1	1	1	1	1	1
1-acylglycerol-3P-palm	1	1	1	1	1	1	1	1	1	1	1	1	1	1	1	1	1	1	1	1	1	1	1	1	1	1	1	1	1	1	1	1	1	1	1	1	1	1	1	1	1	1	1	1	1	1	1	1	1
1-acylglycerol-3P-palmn	1	1	1	1	1	1	1	1	1	1	1	1	1	1	1	1	1	1	1	1	1	1	1	1	1	1	1	1	1	1	1	1	1	1	1	1	1	1	1	1	1	1	1	1	1	1	1	1	1
1-acylglycerol-3P-pentade	1	1	1	1	1	1	1	1	1	1	1	1	1	1	1	1	1	1	1	1	1	1	1	1	1	1	1	1	1	1	1	1	1	1	1	1	1	1	1	1	1	1	1	1	1	1	1	1	1
1-acylglycerol-3P-stea	1	1	1	1	1	1	1	1	1	1	1	1	1	1	1	1	1	1	1	1	1	1	1	1	1	1	1	1	1	1	1	1	1	1	1	1	1	1	1	1	1	1	1	1	1	1	1	1	1
1-acylglycerol-3P-tetraco	1	1	1	1	1	1	1	1	1	1	1	1	1	1	1	1	1	1	1	1	1	1	1	1	1	1	1	1	1	1	1	1	1	1	1	1	1	1	1	1	1	1	1	1	1	1	1	1	1
1-acylglycerol-3P-trico	1	1	1	1	1	1	1	1	1	1	1	1	1	1	1	1	1	1	1	1	1	1	1	1	1	1	1	1	1	1	1	1	1	1	1	1	1	1	1	1	1	1	1	1	1	1	1	1	1
1-acylglycerol-3P-tridec	1	1	1	1	1	1	1	1	1	1	1	1	1	1	1	1	1	1	1	1	1	1	1	1	1	1	1	1	1	1	1	1	1	1	1	1	1	1	1	1	1	1	1	1	1	1	1	1	1
1-acylglycerol-LD-PC pool	0	1	0	0	0	1	0	0	0	0	0	0	0	0	0	1	0	0	0	0	0	0	0	0	0	0	0	0	0	0	1	0	0	0	1	0	0	0	0	0	0	0	0	0	0	0	0	0	0
1-acylglycerol-LD-PE pool	0	1	1	0	1	0	1	0	0	1	1	1	1	1	1	0	1	1	1	0	0	0	1	1	1	0	1	1	1	0	0	1	0	0	0	0	0	0	1	1	1	1	1	1	0	1	1	1	0
1-acylglycerol-LD-PI pool	0	0	0	0	0	0	0	0	1	0	0	0	0	0	0	0	0	0	0	0	0	0	0	0	1	0	0	0	0	0	0	0	1	0	0	0	0	0	0	0	0	0	0	1	0	0	0	0	0
1-acylglycerol-LD-PS pool	0	0	0	1	0	0	0	1	0	1	0	0	0	0	0	0	0	1	0	0	0	0	0	0	0	0	0	0	0	1	0	0	0	1	0	1	0	0	0	0	0	0	0	0	1	0	0	0	0
1-acylglycerol-LD-SM pool	1	0	0	0	0	0	1	0	0	0	1	1	0	0	0	0	0	0	1	1	1	1	0	0	0	0	1	0	0	0	1	1	0	0	0	0	0	1	0	0	0	0	0	1	0	0	0	1	0
1-acylglycerol-LD-TG1 pool	0	1	0	0	0	0	1	0	1	0	0	1	0	1	1	1	1	0	1	0	1	1	0	0	1	0	0	0	0	1	1	0	0	0	1	0	0	1	1	0	1	0	0	1	0	0	1	1	1
1-phosphatidyl-1D-myo-inositol-3,4-bisphosphate	0	0	0	0	0	0	0	0	0	0	0	0	0	0	0	0	0	0	0	0	0	0	0	1	0	0	0	0	0	0	0	0	0	0	0	0	0	0	0	0	0	0	0	1	0	0	0	0	0
1-phosphatidyl-1D-myo-inositol-3-phosphate	0	0	0	0	0	0	0	0	0	0	0	0	0	0	0	0	0	0	0	0	0	0	0	1	0	0	0	0	0	0	0	0	0	0	0	0	0	0	0	0	0	0	0	1	0	0	0	0	0
1-phosphatidyl-1D-myo-inositol-4-phosphate	0	0	0	0	0	0	0	0	0	0	0	0	0	0	0	0	0	0	0	0	0	0	0	1	0	0	0	0	0	0	0	0	0	0	0	0	0	0	0	0	0	0	0	1	0	0	0	0	0
1-phosphatidyl-1D-myo-inositol-5-phosphate	0	0	0	0	0	0	0	0	0	0	0	0	0	0	0	0	0	0	0	0	0	0	0	1	0	0	0	0	0	0	0	0	0	0	0	0	0	0	0	0	0	0	0	1	0	0	0	0	0
1-pyrroline-5-carboxylate	0	0	1	0	0	0	0	0	0	0	1	0	1	1	0	0	0	1	1	0	0	0	0	1	0	0	0	0	0	1	0	1	0	0	1	0	0	0	1	0	0	1	0	1	0	0	0	0	0
10,13,16,19-docosatetraenoic acid	1	1	1	1	1	1	1	1	1	1	1	1	1	1	1	1	1	1	1	1	1	1	1	1	1	1	1	1	1	1	1	1	1	1	1	1	1	1	1	1	1	1	1	1	1	1	1	1	1
10,13,16,19-docosatetraenoyl-CoA	1	1	1	1	1	1	1	1	1	1	1	1	1	1	1	1	1	1	1	1	1	1	1	1	1	1	1	1	1	1	1	1	1	1	1	1	1	1	1	1	1	1	1	1	1	1	1	1	1
10,13,16,19-docosatetraenoylcarnitine	1	1	1	1	1	1	1	1	1	1	1	1	1	1	1	1	1	1	1	1	0	1	1	1	1	1	1	1	1	1	1	1	1	1	1	1	1	1	1	1	1	1	1	1	1	1	1	1	1
10,13,16-docosatrienoyl-CoA	1	1	1	1	1	1	1	1	1	1	1	1	1	1	1	1	1	1	1	1	1	1	1	1	1	1	1	1	1	1	1	1	1	1	1	1	1	1	1	1	1	1	1	1	1	1	1	1	1
10,13,16-docosatrienoylcarnitine	1	1	1	1	1	1	1	1	1	1	1	1	1	1	1	1	1	1	1	1	0	1	1	1	1	1	1	1	1	1	1	1	1	1	1	1	1	1	1	1	1	1	1	1	1	1	1	1	1
10,13,16-docosatriynoic acid	1	1	1	1	1	1	1	1	1	1	1	1	1	1	1	1	1	1	1	1	1	1	1	1	1	1	1	1	1	1	1	1	1	1	1	1	1	1	1	1	1	1	1	1	1	1	1	1	1
10-formyl-THF	1	1	1	1	1	1	1	1	1	1	1	1	1	1	1	1	1	1	1	1	1	1	1	1	1	1	1	1	1	1	1	1	1	1	1	1	1	1	1	1	1	1	1	1	1	1	1	1	1
12,15,18,21-tetracosatetraenoic acid	1	1	1	1	1	1	1	1	1	1	1	1	1	1	1	1	1	1	1	1	1	1	1	1	1	1	1	1	1	1	1	1	1	1	1	1	1	1	1	1	1	1	1	1	1	1	1	1	1
12,15,18,21-tetracosatetraenoyl-CoA	1	1	1	1	1	1	1	1	1	1	1	1	1	1	1	1	1	1	1	1	1	1	1	1	1	1	1	1	1	1	1	1	1	1	1	1	1	1	1	1	1	1	1	1	1	1	1	1	1
12,15,18,21-tetracosatetraenoylcarnitine	1	1	1	1	1	1	1	1	1	1	1	1	1	1	1	1	1	1	1	1	0	1	1	1	1	1	1	1	1	1	1	1	1	1	1	1	1	1	1	1	1	1	1	1	1	1	1	1	1
13,16,19-docosatrienoic acid	1	1	1	1	1	1	1	1	1	1	1	1	1	1	1	1	1	1	1	1	1	1	1	1	1	1	1	1	1	1	1	1	1	1	1	1	1	1	1	1	1	1	1	1	1	1	1	1	1
13,16,19-docosatrienoyl-CoA	1	1	1	1	1	1	1	1	1	1	1	1	1	1	1	1	1	1	1	1	1	1	1	1	1	1	1	1	1	1	1	1	1	1	1	1	1	1	1	1	1	1	1	1	1	1	1	1	1
13,16,19-docosatrienoylcarnitine	1	1	1	1	1	1	1	1	1	1	1	1	1	1	1	1	1	1	1	1	0	1	1	1	1	1	1	1	1	1	1	1	1	1	1	1	1	1	1	1	1	1	1	1	1	1	1	1	1
14-demethyllanosterol	0	0	0	0	0	0	0	0	1	0	0	0	0	0	0	0	0	1	0	0	0	0	0	0	0	1	0	0	0	0	0	0	0	0	0	0	0	0	0	0	0	0	0	1	0	0	0	0	0
1D-myo-inositol-1,3,4,5-tetrakisphosphate	0	0	0	0	0	0	0	0	0	0	0	1	0	0	0	0	0	0	0	0	1	0	1	0	1	0	0	0	0	0	0	0	0	0	1	0	0	0	0	0	0	0	0	1	0	0	0	0	0
1D-myo-inositol-1,3,4-trisphosphate	0	0	0	0	0	0	0	0	0	0	0	1	0	0	0	0	0	0	0	0	1	0	1	0	1	0	0	0	0	0	0	0	0	0	1	0	0	0	0	0	0	0	0	1	0	0	0	0	0
1D-myo-inositol-1,4-bisphosphate	0	0	0	0	0	0	0	0	0	0	0	0	0	0	0	0	0	0	0	0	0	0	0	0	0	0	0	0	0	0	0	0	0	0	0	0	0	0	0	0	0	0	0	0	0	0	0	0	0
1D-myo-inositol-3,4-bisphosphate	0	0	0	0	0	0	0	0	0	0	0	1	0	0	0	0	0	0	0	0	1	0	1	0	1	0	0	0	0	0	0	0	0	0	1	0	0	0	0	0	0	0	0	0	0	0	0	0	0
1D-myo-inositol-3-phosphate	0	0	0	0	0	0	0	0	1	0	0	1	0	0	1	0	0	0	0	0	1	0	1	0	1	0	0	0	0	0	0	0	0	0	1	0	0	0	0	0	0	0	0	1	0	0	0	0	0
1D-myo-inositol-4-phosphate	0	0	0	0	0	0	0	0	0	0	0	0	0	0	0	0	0	0	0	0	0	0	0	0	0	0	0	0	0	0	0	0	0	0	0	0	0	0	0	0	0	0	0	0	0	0	0	0	0
2,3-diketo-5-methylthiopentyl-1-phosphate	0	0	0	0	0	0	0	0	0	0	0	0	0	0	0	0	0	0	1	0	0	0	0	0	0	0	0	0	0	0	0	0	0	0	0	0	0	0	0	0	0	0	0	1	0	0	0	0	0
2-deoxy-D-ribose-1-phosphate	0	0	0	0	0	0	0	1	0	0	0	0	0	0	1	0	1	0	0	0	0	0	0	1	0	0	0	0	0	0	1	0	0	0	0	0	1	0	0	0	0	1	0	1	0	0	0	0	1
2-deoxy-D-ribose-5-phosphate	0	0	0	0	0	0	0	1	0	0	0	0	0	0	0	0	0	0	0	0	0	0	0	1	0	0	0	0	0	0	0	0	0	0	0	0	0	0	0	0	0	0	0	1	0	0	0	0	0
2-lysolecithin pool	1	1	1	1	1	1	1	1	1	1	1	1	1	1	1	1	1	1	1	1	1	1	1	1	1	1	1	1	1	1	1	1	1	1	1	1	1	1	1	1	1	1	1	1	1	1	1	1	1
2-methylacetoacetyl-CoA	0	0	0	0	0	0	0	0	0	0	0	0	0	0	0	0	0	0	0	0	0	0	0	1	0	0	0	0	0	0	0	0	0	0	0	0	0	0	1	0	0	0	0	0	0	0	0	0	0
2-methylbutyryl-CoA	0	0	0	0	0	0	0	0	0	0	0	0	0	0	0	0	0	0	0	0	0	0	0	1	0	0	0	0	0	0	0	0	0	0	0	0	0	0	1	0	0	0	0	1	0	0	0	0	0
2-oxo-3-methylvalerate	0	0	0	0	0	0	0	0	0	0	0	0	0	0	0	0	0	0	0	0	0	0	0	1	0	0	0	0	0	0	0	0	0	0	0	0	0	0	1	0	0	0	0	1	0	0	0	0	0
2-oxobutyrate	0	0	0	0	0	0	0	0	0	0	0	0	0	0	0	0	0	0	0	0	0	0	0	1	0	0	0	0	0	0	0	0	0	0	0	0	0	0	0	0	0	0	0	1	0	0	0	0	0
2-oxoglutaramate	0	0	0	0	0	0	0	0	0	0	0	0	0	0	0	0	0	0	0	0	0	0	0	1	0	0	0	0	0	0	0	0	0	0	0	0	0	0	0	0	0	0	0	1	0	0	0	0	0
2-phospho-D-glycerate	0	1	0	0	1	0	0	1	0	1	0	0	0	1	0	0	0	0	0	0	0	0	0	1	1	0	1	1	0	1	0	0	1	1	1	1	1	1	1	0	1	1	1	1	1	0	1	0	1
2-trans-4-cis-decadienoyl-CoA	1	0	0	1	0	1	1	1	1	1	1	1	0	1	1	1	1	0	1	1	1	0	0	0	0	1	1	1	1	1	1	0	1	1	1	1	0	0	0	1	0	0	1	1	1	1	1	0	0
2-trans-7,10,13,16,19-all-cis-docosahexaenoyl-CoA	1	0	0	1	1	0	1	1	1	1	1	1	1	1	1	1	1	1	1	1	1	1	1	1	1	1	1	1	1	1	0	1	1	1	1	1	0	1	0	1	0	0	1	1	1	0	1	1	0
2-trans-9,12,15,18,21-all-cis-tetracosahexaenoyl-CoA	1	1	0	1	0	1	1	0	1	0	1	1	0	1	1	1	0	0	0	0	1	1	0	1	0	0	0	1	0	0	0	0	0	0	1	0	0	1	0	0	0	1	0	1	1	1	1	1	0
2-trans-9,12,15,18-all-cis-tetracosapentaenoyl-CoA	0	0	0	1	0	1	1	0	1	1	0	0	0	1	1	1	0	0	0	0	1	1	1	1	0	0	0	0	0	0	0	0	1	1	1	0	1	1	0	0	1	1	0	1	0	1	1	1	0
2-trans-cis,cis,cis,cis-4,8,11,14-eicosapentaenoyl-CoA	1	0	0	1	0	1	1	0	0	1	1	1	1	0	0	1	0	1	1	0	0	0	0	0	1	0	1	1	1	1	1	0	1	1	1	0	0	0	0	1	0	0	0	0	1	0	1	0	0
24,25-dihydrolanosterol	1	0	0	0	0	0	0	0	0	1	0	0	0	1	0	0	0	0	0	0	0	0	0	1	0	0	0	1	0	0	0	0	0	0	0	0	1	0	1	0	0	1	1	1	0	0	1	0	0
3(S)-hydroxy-(5Z,8Z)-tetradecadienoyl-CoA	1	0	0	1	0	1	1	1	1	1	1	1	0	1	1	1	1	0	1	1	1	0	0	0	0	1	1	1	1	1	1	0	1	1	1	1	0	0	0	1	0	0	1	1	1	1	1	0	0
3(S)-hydroxy-(6Z,9Z,12Z)-octadecatrienoyl-CoA	1	0	0	1	0	1	1	1	1	1	1	1	0	1	1	1	1	0	1	0	0	0	0	0	0	1	1	1	1	1	1	0	1	1	1	1	0	0	0	1	0	0	1	1	1	1	1	0	0
3(S)-hydroxy-10,13,16-all-cis-docosatrienoyl-CoA	0	0	0	1	0	1	1	0	1	0	0	0	1	1	1	1	0	1	0	0	1	1	0	1	1	0	0	1	0	0	0	0	0	0	1	0	0	1	0	0	0	0	0	1	0	1	1	1	1
3(S)-hydroxy-11-cis-docosenoyl-CoA	0	0	0	1	0	1	1	0	1	0	0	0	0	1	1	1	0	0	0	0	1	1	0	1	0	0	0	0	0	0	0	0	0	0	1	0	0	1	0	0	0	0	0	1	1	1	1	1	0
3(S)-hydroxy-11-cis-eicosenoyl-CoA	1	1	1	1	1	1	1	1	1	1	1	1	1	1	1	1	1	1	1	1	1	1	1	1	1	1	1	1	1	1	1	1	1	1	1	1	1	1	1	1	1	1	1	1	1	1	1	1	1
3(S)-hydroxy-13-cis-docosenoyl-CoA	1	1	1	1	1	1	1	1	1	1	1	1	1	1	1	1	1	1	1	1	1	1	1	1	1	1	1	1	1	1	1	1	1	1	1	1	1	1	1	1	1	1	1	1	1	1	1	1	1
3(S)-hydroxy-13-cis-eicosenoyl-CoA	1	0	0	1	1	1	1	1	1	1	1	1	1	1	1	1	0	1	0	1	1	1	1	1	0	1	1	1	0	1	0	1	1	1	1	1	1	1	0	1	1	1	1	1	1	1	1	1	0
3(S)-hydroxy-3-oxo-eicosadienoyl-CoA	1	0	0	1	0	1	1	0	1	0	1	0	1	1	1	1	0	1	0	1	1	1	1	1	0	0	0	1	0	0	0	1	1	1	1	0	0	1	0	0	0	0	1	1	0	1	1	1	0
3(S)-hydroxy-9-cis-eicosenoyl-CoA	1	0	0	1	1	1	1	1	1	0	1	0	1	1	1	1	0	1	0	1	1	1	1	1	0	1	1	1	0	1	0	1	1	1	1	1	0	1	0	1	0	1	1	1	0	1	1	1	0
3(S)-hydroxy-all-cis-8,11,14,17-eicosatetraenoyl-CoA	1	1	1	1	1	1	1	1	1	1	1	1	1	1	1	1	1	1	1	1	1	1	1	1	1	1	1	1	1	1	1	1	1	1	1	1	1	1	1	1	1	1	1	1	1	1	1	1	1
3(S)-hydroxy-cis-15-tetracosaenoyl-CoA	1	1	1	1	1	1	1	1	1	1	1	1	1	1	1	1	1	1	1	1	1	1	1	1	1	1	1	1	1	1	1	1	1	1	1	1	1	1	1	1	1	1	1	1	1	1	1	1	1
3(S)-hydroxy-dihomo-gamma-linolenoyl-CoA	1	1	1	1	1	1	1	0	0	1	1	1	1	0	0	1	1	1	1	1	0	1	1	1	1	0	1	1	1	1	1	0	1	1	1	0	1	1	1	1	1	1	0	0	1	0	1	1	1
3(S)-hydroxy-docosa-10,13,16,19-all-cis-tetraenoyl-CoA	0	0	0	1	0	1	1	1	1	1	0	0	0	1	1	1	0	0	0	0	1	1	0	1	0	0	0	0	1	0	0	0	0	0	1	0	0	1	0	0	0	0	0	1	0	1	1	1	0
3(S)-hydroxy-docosa-13,16,19-all-cis-trienoyl-CoA	1	1	1	1	1	1	1	1	1	1	1	0	1	1	1	1	1	1	0	1	1	1	1	1	0	1	1	0	0	1	0	1	1	1	1	0	0	1	0	0	0	0	1	1	1	1	1	1	0
3(S)-hydroxy-docosa-7,10,13,16,19-all-cis-pentaenoyl-CoA	1	0	0	1	1	0	1	1	1	1	1	1	1	1	1	1	1	1	1	1	1	1	1	1	1	1	1	1	1	1	0	1	1	1	1	1	0	1	0	1	0	0	1	1	1	0	1	1	0
3(S)-hydroxy-docosa-7,10,13,16-all-cis-tetraenoyl-CoA	0	1	1	0	1	0	0	1	1	0	0	0	0	1	0	0	0	0	0	1	1	1	0	1	1	1	0	0	0	0	0	0	0	0	0	0	1	1	1	0	1	1	1	1	0	1	0	1	1
3(S)-hydroxy-hexacosenoyl-CoA	1	1	1	1	1	1	1	1	1	1	1	1	1	1	1	1	1	1	1	1	1	1	1	1	1	1	1	1	1	1	1	1	1	1	1	1	1	1	1	1	1	1	1	1	1	1	1	1	1
3(S)-hydroxy-tetracosa-12,15,18,21-all-cis-tetraenoyl-CoA	1	0	1	1	1	1	1	1	1	1	1	1	0	1	1	1	0	1	0	1	1	1	1	1	0	1	1	0	1	1	0	0	1	1	1	1	1	1	0	1	1	1	1	1	1	1	1	1	0
3(S)-hydroxy-tetracosa-6,9,12,15,18-all-cis-pentaenoyl-CoA	1	0	0	0	1	0	1	1	1	1	1	1	1	0	1	0	0	1	0	1	0	1	1	1	0	1	1	1	0	1	0	1	1	1	1	1	1	0	0	1	1	1	1	0	1	1	0	1	0
3(S)-hydroxy-tetracosa-9,12,15,18,21-all-cis-pentaenoyl-CoA	1	1	0	1	0	1	1	0	1	0	1	1	0	1	1	1	0	0	0	0	1	1	0	1	0	0	0	1	0	0	0	0	0	0	1	0	0	1	0	0	0	1	0	1	1	1	1	1	0
3-amino-propanal	0	0	0	0	0	0	0	0	0	0	0	0	0	0	0	0	0	0	1	0	0	0	0	0	0	0	0	0	0	0	0	0	0	0	0	0	0	0	0	0	0	0	0	1	0	0	0	0	0
3-carboxy-1-hydroxypropyl-ThPP	0	0	0	0	0	0	0	0	0	0	0	0	0	0	0	0	0	0	0	0	0	0	0	1	0	0	0	0	0	0	0	0	0	0	0	0	0	0	0	0	0	0	0	1	0	0	0	0	0
3-dehydrosphinganine	1	1	1	1	1	1	1	1	1	1	1	1	1	1	1	1	1	1	1	1	1	1	1	1	1	1	1	1	1	1	1	1	1	1	1	1	1	1	1	1	1	1	1	1	1	1	1	1	1
3-hydroxy-THA-CoA	1	1	0	0	1	0	0	1	0	1	1	1	1	0	0	0	0	1	0	1	0	0	1	1	0	1	1	1	0	1	0	1	1	1	0	1	1	0	0	1	1	1	1	0	1	0	0	0	0
3-hydroxydocosanoyl-CoA	1	1	1	1	1	1	1	1	1	1	1	1	1	1	1	1	1	1	1	1	1	1	1	1	1	1	1	1	1	1	1	1	1	1	1	1	1	1	1	1	1	1	1	1	1	1	1	1	1
3-hydroxyeicosanoyl-CoA	1	1	1	1	1	0	1	1	1	1	1	1	1	1	1	1	1	1	1	1	0	1	1	1	1	1	1	1	1	1	1	1	1	1	1	1	1	0	1	1	1	1	1	1	1	1	1	0	1
3-hydroxyheneicosanoyl-CoA	0	0	0	1	1	1	1	1	1	0	1	0	0	1	1	1	0	0	0	1	1	1	0	1	0	1	1	0	0	0	0	0	0	0	1	1	1	1	0	0	1	1	1	1	0	1	1	1	0
3-hydroxyheptadecanoyl-CoA	0	0	0	0	0	0	0	0	0	0	0	0	0	0	0	0	0	0	0	0	0	0	0	0	1	0	0	0	0	0	1	0	0	0	0	0	0	1	0	0	0	0	0	1	0	0	0	0	0
3-hydroxyheptadecanoyl-[ACP]	0	0	0	0	0	0	0	0	0	0	0	0	0	0	0	0	0	0	0	0	0	0	0	1	0	0	0	0	0	0	0	0	0	0	0	0	0	0	0	0	0	0	0	1	0	0	0	0	0
3-hydroxyheptanoyl-CoA	1	1	1	1	1	1	1	1	1	1	1	1	1	1	1	1	1	1	1	1	1	1	1	0	1	1	1	1	1	1	1	1	1	1	1	1	1	1	1	1	1	1	1	1	1	1	1	1	1
3-hydroxyheptanoyl-[ACP]	0	0	0	0	0	0	0	0	0	0	0	0	0	0	0	0	0	0	0	0	0	0	0	1	0	0	0	0	0	0	0	0	0	0	0	0	0	0	0	0	0	0	0	1	0	0	0	0	0
3-hydroxyhexacosanoyl-CoA	1	1	1	1	1	1	1	1	0	1	1	1	1	1	1	1	1	1	1	1	1	1	1	1	1	1	1	1	1	1	1	1	1	1	1	1	1	1	1	1	1	1	1	1	1	0	1	1	1
3-hydroxynonadecanoyl-CoA	0	0	0	1	1	1	1	1	1	1	1	0	0	1	1	1	0	0	0	1	1	1	0	1	0	1	1	1	0	0	0	0	0	0	1	0	0	1	0	0	1	1	1	1	1	1	1	1	0
3-hydroxynonanoyl-CoA	1	1	1	1	1	1	1	1	1	1	1	1	1	1	1	1	1	1	1	1	1	1	1	0	1	1	1	1	1	1	1	1	1	1	1	1	1	1	1	1	1	1	1	1	1	1	1	1	1
3-hydroxynonanoyl-[ACP]	0	0	0	0	0	0	0	0	0	0	0	0	0	0	0	0	0	0	0	0	0	0	0	1	0	0	0	0	0	0	0	0	0	0	0	0	0	0	0	0	0	0	0	1	0	0	0	0	0
3-hydroxyoctadecanoyl-CoA	1	1	1	1	1	0	1	1	1	1	1	1	1	1	1	1	1	1	1	1	1	1	1	1	1	1	1	1	1	1	1	1	1	1	1	1	1	1	1	1	1	1	1	1	1	0	1	1	1
3-hydroxypentadecanoyl-CoA	1	1	1	1	1	1	1	1	1	1	1	1	1	1	1	1	1	1	1	1	1	1	1	1	1	1	1	1	1	1	1	1	1	1	1	1	1	1	1	1	1	1	1	1	1	1	1	1	1
3-hydroxypentadecanoyl-[ACP]	0	0	0	0	0	0	0	0	0	0	0	0	0	0	0	0	0	0	0	0	0	0	0	1	0	0	0	0	0	0	0	0	0	0	0	0	0	0	0	0	0	0	0	1	0	0	0	0	0
3-hydroxypentanoyl-CoA	1	1	1	1	1	1	1	1	1	1	1	1	1	1	1	1	1	1	1	1	1	1	1	0	1	1	1	1	1	1	1	1	1	1	1	1	1	1	1	1	1	1	1	1	1	1	1	1	1
3-hydroxypentanoyl-[ACP]	0	0	0	0	0	0	0	0	0	0	0	0	0	0	0	0	0	0	0	0	0	0	0	1	0	0	0	0	0	0	0	0	0	0	0	0	0	0	0	0	0	0	0	1	0	0	0	0	0
3-hydroxypropionyl-CoA	0	0	0	0	0	0	0	0	0	0	0	0	0	0	0	0	0	0	0	0	1	1	0	1	0	0	0	0	0	0	0	0	0	0	0	0	0	0	0	1	0	0	0	1	0	0	0	0	0
3-hydroxytetracosanoyl-CoA	1	1	1	1	1	0	1	1	1	1	1	1	1	0	1	1	1	1	1	1	0	1	1	1	1	1	1	1	1	1	1	1	1	1	1	1	1	0	1	1	1	1	1	1	1	0	1	0	1
3-hydroxytricosanoyl-CoA	0	0	0	0	0	1	0	0	1	1	0	0	0	1	0	0	0	0	0	0	1	0	0	1	0	0	0	1	0	0	0	0	0	0	0	1	1	1	0	0	0	0	0	0	1	1	0	1	0
3-hydroxytridecanoyl-CoA	1	1	1	1	1	1	1	1	1	1	1	1	1	1	1	1	1	1	1	1	1	1	1	0	1	1	1	1	1	1	1	1	1	1	1	1	1	1	1	1	1	1	1	1	1	1	1	1	1
3-hydroxytridecanoyl-[ACP]	0	0	0	0	0	0	0	0	0	0	0	0	0	0	0	0	0	0	0	0	0	0	0	1	0	0	0	0	0	0	0	0	0	0	0	0	0	0	0	0	0	0	0	1	0	0	0	0	0
3-hydroxyundecanoyl-CoA	1	1	1	1	1	1	1	1	1	1	1	1	1	1	1	1	1	1	1	1	1	1	1	0	1	1	1	1	1	1	1	1	1	1	1	1	1	1	1	1	1	1	1	1	1	1	1	1	1
3-hydroxyundecanoyl-[ACP]	0	0	0	0	0	0	0	0	0	0	0	0	0	0	0	0	0	0	0	0	0	0	0	1	0	0	0	0	0	0	0	0	0	0	0	0	0	0	0	0	0	0	0	1	0	0	0	0	0
3-keto-THA-CoA	1	1	0	0	1	0	0	1	0	1	1	1	1	0	0	0	0	1	0	1	0	0	1	1	0	1	1	1	0	1	0	1	1	1	0	1	1	0	0	1	1	1	1	0	1	0	0	0	0
3-keto-eicosa-8,11,14,17-all-cis-tetraenoyl-CoA	1	1	1	1	1	1	1	1	1	1	1	1	1	1	1	1	1	1	1	1	1	1	1	1	1	1	1	1	1	1	1	1	1	1	1	1	1	1	1	1	1	1	1	1	1	1	1	1	1
3-oxo-(6Z,9Z,12Z)-octadecatrienoyl-CoA	1	0	0	1	0	1	1	1	1	1	1	1	0	1	1	1	1	0	1	0	0	0	0	1	0	1	1	1	1	1	1	0	1	1	1	1	0	0	0	1	0	0	1	1	1	1	1	0	0
3-oxo-11-cis-eicosenoyl-CoA	1	1	1	1	1	1	1	1	1	1	1	1	1	1	1	1	1	1	1	1	1	1	1	1	1	1	1	1	1	1	1	1	1	1	1	1	1	1	1	1	1	1	1	1	1	1	1	1	1
3-oxo-11-cis-octadecenoyl-CoA	1	0	0	0	1	0	0	1	0	1	1	1	1	0	0	0	0	0	0	1	0	0	1	1	0	1	1	1	0	1	0	1	1	1	0	1	1	0	0	1	1	0	1	1	1	0	0	0	0
3-oxo-11cis-docosenoyl-CoA	0	0	0	1	0	1	1	0	1	0	0	0	0	1	1	1	0	0	0	0	1	1	0	1	0	0	0	0	0	0	0	0	0	0	1	0	0	1	0	0	0	0	0	1	1	1	1	1	0
3-oxo-13-cis-eicosenoyl-CoA	1	0	0	1	1	1	1	1	1	1	1	1	1	1	1	1	0	1	0	1	1	1	1	1	0	1	1	1	0	1	0	1	1	1	1	1	1	1	0	1	1	1	1	1	1	1	1	1	0
3-oxo-13cis-docosenoyl-CoA	1	1	1	1	1	1	1	1	1	1	1	1	1	1	1	1	1	1	1	1	1	1	1	1	1	1	1	1	1	1	1	1	1	1	1	1	1	1	1	1	1	1	1	1	1	1	1	1	1
3-oxo-7-hexadecenoyl-CoA	1	1	1	1	1	1	1	1	1	1	1	1	1	1	1	1	1	1	1	1	1	1	1	1	1	1	1	1	1	1	1	1	1	1	1	1	1	1	1	1	1	1	1	1	1	1	1	1	1
3-oxo-9-cis-eicosenoyl-CoA	1	0	0	1	1	1	1	1	1	0	1	0	1	1	1	1	0	1	0	1	1	1	1	1	0	1	1	1	0	1	0	1	1	1	1	1	0	1	0	1	0	1	1	1	0	1	1	1	0
3-oxo-all-cis-6,9,12,15,18-tetracosapentaenoyl-CoA	1	0	0	0	1	0	1	1	1	1	1	1	1	0	1	0	0	1	0	1	0	1	1	1	0	1	1	1	0	1	0	1	1	1	1	1	1	0	0	1	1	1	1	0	1	1	0	1	0
3-oxo-cis,cis-5,8-tetradecadienoyl-CoA	1	0	0	1	0	1	1	1	1	1	1	1	0	1	1	1	1	0	1	1	1	0	0	0	0	1	1	1	1	1	1	0	1	1	1	1	0	0	0	1	0	0	1	1	1	1	1	0	0
3-oxo-cis,cis-7,10-hexadecadienoyl-CoA	1	0	0	1	0	1	1	1	1	1	1	1	0	1	1	1	1	0	1	1	1	0	0	0	0	1	1	1	1	1	1	0	1	1	1	1	0	0	0	1	0	0	1	1	1	1	1	0	0
3-oxo-cis-15-tetracosaenoyl-CoA	1	1	1	1	1	1	1	1	1	1	1	1	1	1	1	1	1	1	1	1	1	1	1	1	1	1	1	1	1	1	1	1	1	1	1	1	1	1	1	1	1	1	1	1	1	1	1	1	1
3-oxo-dihomo-gamma-linolenoyl-CoA	1	1	1	1	1	1	1	0	0	1	1	1	1	0	0	1	1	1	1	1	0	1	1	1	1	0	1	1	1	1	1	0	1	1	1	0	1	1	1	1	1	1	0	0	1	0	1	1	1
3-oxo-docosa-10,13,16,19-all-cis-tetraenoyl-CoA	0	0	0	1	0	1	1	1	1	1	0	0	0	1	1	1	0	0	0	0	1	1	0	1	0	0	0	0	1	0	0	0	0	0	1	0	0	1	0	0	0	0	0	1	0	1	1	1	0
3-oxo-docosa-13,16,19-all-cis-trienoyl-CoA	1	1	1	1	1	1	1	1	1	1	1	0	1	1	1	1	1	1	0	1	1	1	1	1	0	1	1	0	0	1	0	1	1	1	1	0	0	1	0	0	0	0	1	1	1	1	1	1	0
3-oxo-docosa-7,10,13,16,19-all-cis-pentaenoyl-CoA	1	0	0	1	1	0	1	1	1	1	1	1	1	1	1	1	1	1	1	1	1	1	1	1	1	1	1	1	1	1	0	1	1	1	1	1	0	1	0	1	0	0	1	1	1	0	1	1	0
3-oxo-docosa-7,10,13,16-all-cis-tetraenoyl-CoA	0	1	1	0	1	0	0	1	1	0	0	0	0	1	0	0	0	0	0	1	1	1	0	1	1	1	0	0	0	0	0	0	0	0	0	0	1	1	1	0	1	1	1	1	0	1	0	1	1
3-oxo-docosa-cis,cis,cis-10,13,16-trienoyl-CoA	0	0	0	1	0	1	1	0	1	0	0	0	1	1	1	1	0	1	0	0	1	1	0	1	1	0	0	1	0	0	0	0	0	0	1	0	0	1	0	0	0	0	0	1	0	1	1	1	1
3-oxo-eicosadienoyl-CoA	1	0	0	1	0	1	1	0	1	0	1	0	1	1	1	1	0	1	0	1	1	1	1	1	0	0	0	1	0	0	0	1	1	1	1	0	0	1	0	0	0	0	1	1	0	1	1	1	0
3-oxo-hexacosenoyl-CoA	1	1	1	1	1	1	1	1	1	1	1	1	1	1	1	1	1	1	1	1	1	1	1	1	1	1	1	1	1	1	1	1	1	1	1	1	1	1	1	1	1	1	1	1	1	1	1	1	1
3-oxo-tetracosa-12,15,18,21-all-cis-tetraenoyl-CoA	1	0	0	1	1	1	1	1	0	1	1	1	0	1	0	0	0	1	0	1	0	1	1	1	0	1	1	0	1	1	0	0	1	1	1	1	0	1	0	1	0	0	1	1	1	0	0	0	0
3-oxo-tetracosa-9,12,15,18,21-all-cis-pentaenoyl-CoA	1	1	0	1	0	1	1	0	1	0	1	1	0	1	1	1	0	0	0	0	1	1	0	1	0	0	0	1	0	0	0	0	0	0	1	0	0	1	0	0	0	1	0	1	1	1	1	1	0
3-oxo-tetracosa-9,12,15,18-all-cis-tetraenoyl-CoA	0	0	1	0	0	1	1	0	1	0	0	1	0	0	1	1	0	0	0	0	0	0	0	0	0	0	0	0	1	0	0	0	0	0	1	0	1	0	0	0	1	1	0	0	0	1	1	1	0
3-oxodecanoyl-CoA	1	1	1	1	1	1	1	1	1	1	1	1	1	1	1	1	1	1	1	1	1	1	1	1	1	1	1	1	1	1	1	1	1	1	1	1	1	1	1	1	1	1	1	1	1	1	1	1	1
3-oxodocasa-cis,cis-13,16-dienoyl-CoA	1	0	0	1	1	1	1	1	1	0	1	0	1	1	1	1	1	1	1	1	1	1	1	1	1	1	1	1	1	1	1	1	1	1	1	1	0	1	0	1	0	0	1	1	0	1	1	1	0
3-oxodocosanoyl-CoA	1	1	1	1	1	1	1	1	1	1	1	1	1	1	1	1	1	1	1	1	1	1	1	1	1	1	1	1	1	1	1	1	1	1	1	1	1	1	1	1	1	1	1	1	1	1	1	1	1
3-oxododecanoyl-CoA	1	1	1	1	1	1	1	1	1	1	1	1	1	1	1	1	1	1	1	1	1	1	1	1	1	1	1	1	1	1	1	1	1	1	1	1	1	1	1	1	1	1	1	1	1	1	1	1	1
3-oxoeicosa-cis,cis,cis-11,14,17-trienoyl-CoA	0	0	0	0	0	0	0	0	0	0	0	0	0	0	0	0	0	0	0	0	0	0	0	1	0	0	0	0	0	0	0	0	0	0	0	0	0	0	0	0	0	0	0	1	0	0	0	0	0
3-oxoeicosa-cis,cis-11,14-dienoyl-CoA	0	0	0	0	0	0	0	0	1	0	0	0	0	1	0	0	0	0	0	0	0	0	0	1	0	0	0	1	0	0	0	0	0	0	0	1	0	0	0	0	0	0	0	1	1	0	0	1	1
3-oxoeicosanoyl-CoA	1	1	1	1	1	0	1	1	1	1	1	1	1	1	1	1	1	1	1	1	0	1	1	1	1	1	1	1	1	1	1	1	1	1	1	1	1	0	1	1	1	1	1	1	1	1	1	0	1
3-oxoheneicosanoyl-CoA	0	0	0	1	1	1	1	1	1	0	1	0	0	1	1	1	0	0	0	1	1	1	0	1	0	1	1	0	0	0	0	0	0	0	1	1	1	1	0	0	1	1	1	1	0	1	1	1	0
3-oxoheptadecanoyl-CoA	0	0	0	0	0	0	0	0	0	0	0	0	0	0	0	0	0	0	0	0	0	0	0	0	1	0	0	0	0	0	1	0	0	0	0	0	0	1	0	0	0	0	0	1	0	0	0	0	0
3-oxoheptadecanoyl-[ACP]	0	0	0	0	0	0	0	0	0	0	0	0	0	0	0	0	0	0	0	0	0	0	0	1	0	0	0	0	0	0	0	0	0	0	0	0	0	0	0	0	0	0	0	1	0	0	0	0	0
3-oxoheptanoyl-CoA	1	1	1	1	1	1	1	1	1	1	1	1	1	1	1	1	1	1	1	1	1	1	1	0	1	1	1	1	1	1	1	1	1	1	1	1	1	1	1	1	1	1	1	1	1	1	1	1	1
3-oxoheptanoyl-[ACP]	0	0	0	0	0	0	0	0	0	0	0	0	0	0	0	0	0	0	0	0	0	0	0	1	0	0	0	0	0	0	0	0	0	0	0	0	0	0	0	0	0	0	0	1	0	0	0	0	0
3-oxohexacosanoyl-CoA	1	1	1	1	1	1	1	1	0	1	1	1	1	1	1	1	1	1	1	1	1	1	1	1	1	1	1	1	1	1	1	1	1	1	1	1	1	1	1	1	1	1	1	1	1	0	1	1	1
3-oxohexanoyl-CoA	1	1	1	1	1	1	1	1	1	1	1	1	1	1	1	1	1	1	1	1	1	1	1	1	1	1	1	1	1	1	1	1	1	1	1	1	1	1	1	1	1	1	1	1	1	1	1	1	1
3-oxolaur-6-cis-enoyl-CoA	1	0	0	1	0	1	1	1	1	1	1	1	0	1	1	1	1	0	1	1	1	0	0	0	0	1	1	1	1	1	1	0	1	1	1	1	0	0	0	1	0	0	1	1	1	1	1	0	0
3-oxomyrist-5-enoyl-CoA	1	1	1	1	1	1	1	1	1	1	1	1	1	1	1	1	1	1	1	1	1	1	1	1	1	1	1	1	1	1	1	1	1	1	1	1	1	1	1	1	1	1	1	1	1	1	1	1	1
3-oxomyrist-7-enoyl-CoA	1	1	1	1	1	1	1	1	1	1	1	1	1	1	1	1	1	1	1	1	1	1	1	1	1	1	1	1	1	1	1	1	1	1	1	1	1	1	1	1	1	1	1	1	1	1	1	1	1
3-oxononadecanoyl-CoA	0	0	0	1	1	1	1	1	1	1	1	0	0	1	1	1	0	0	0	1	1	1	0	1	0	1	1	1	0	0	0	0	0	0	1	0	0	1	0	0	1	1	1	1	1	1	1	1	0
3-oxononanoyl-CoA	1	1	1	1	1	1	1	1	1	1	1	1	1	1	1	1	1	1	1	1	1	1	1	0	1	1	1	1	1	1	1	1	1	1	1	1	1	1	1	1	1	1	1	1	1	1	1	1	1
3-oxononanoyl-[ACP]	0	0	0	0	0	0	0	0	0	0	0	0	0	0	0	0	0	0	0	0	0	0	0	1	0	0	0	0	0	0	0	0	0	0	0	0	0	0	0	0	0	0	0	1	0	0	0	0	0
3-oxooctadecanoyl-CoA	1	1	1	1	1	0	1	1	1	1	1	1	1	1	1	1	1	1	1	1	1	1	1	1	1	1	1	1	1	1	1	1	1	1	1	1	1	1	1	1	1	1	1	1	1	0	1	1	1
3-oxooctanoyl-CoA	1	1	1	1	1	1	1	1	1	1	1	1	1	1	1	1	1	1	1	1	1	1	1	1	1	1	1	1	1	1	1	1	1	1	1	1	1	1	1	1	1	1	1	1	1	1	1	1	1
3-oxooleoyl-CoA	1	1	1	1	1	1	1	1	1	1	1	1	1	1	1	1	1	1	1	1	1	1	1	1	1	1	1	1	1	1	1	1	1	1	1	1	1	1	1	1	1	1	1	1	1	1	1	1	1
3-oxopalmitoleoyl-CoA	1	1	1	1	1	1	1	1	1	1	1	1	1	1	1	1	1	1	1	1	1	1	1	1	1	1	1	1	1	1	1	1	1	1	1	1	1	1	1	1	1	1	1	1	1	1	1	1	1
3-oxopalmitoyl-CoA	1	1	1	1	1	0	0	1	1	1	1	1	1	0	1	1	1	1	1	1	0	1	1	0	1	1	1	1	1	1	1	1	1	1	1	1	1	0	1	1	1	1	1	1	1	0	1	0	1
3-oxopentadecanoyl-CoA	1	1	1	1	1	1	1	1	1	1	1	1	1	1	1	1	1	1	1	1	1	1	1	1	1	1	1	1	1	1	1	1	1	1	1	1	1	1	1	1	1	1	1	1	1	1	1	1	1
3-oxopentadecanoyl-[ACP]	0	0	0	0	0	0	0	0	0	0	0	0	0	0	0	0	0	0	0	0	0	0	0	1	0	0	0	0	0	0	0	0	0	0	0	0	0	0	0	0	0	0	0	1	0	0	0	0	0
3-oxopentanoyl-CoA	1	1	1	1	1	1	1	1	1	1	1	1	1	1	1	1	1	1	1	1	1	1	1	0	1	1	1	1	1	1	1	1	1	1	1	1	1	1	1	1	1	1	1	1	1	1	1	1	1
3-oxopentanoyl-[ACP]	0	0	0	0	0	0	0	0	0	0	0	0	0	0	0	0	0	0	0	0	0	0	0	1	0	0	0	0	0	0	0	0	0	0	0	0	0	0	0	0	0	0	0	1	0	0	0	0	0
3-oxopropanoate	0	0	0	0	0	0	0	0	0	0	0	0	0	0	0	0	0	0	1	0	1	1	0	0	0	0	0	0	0	0	0	0	0	0	0	0	0	0	0	1	0	0	0	1	0	0	0	0	0
3-oxotetracosanoyl-CoA	1	1	1	1	1	0	1	1	1	1	1	1	1	0	1	1	1	1	1	1	0	1	1	1	1	1	1	1	1	1	1	1	1	1	1	1	1	0	1	1	1	1	1	1	1	0	1	0	1
3-oxotetradecanoyl-CoA	1	1	1	1	1	0	0	1	1	1	1	1	1	0	1	1	1	1	1	1	0	1	1	1	1	1	1	1	1	1	1	1	1	1	1	1	1	0	1	1	1	1	1	1	1	0	1	1	1
3-oxotricosanoyl-CoA	0	0	0	0	0	1	0	0	1	1	0	0	0	1	0	0	0	0	0	0	1	0	0	1	0	0	0	1	0	0	0	0	0	0	0	1	1	1	0	0	0	0	0	0	1	1	0	1	0
3-oxotridecanoyl-CoA	1	1	1	1	1	1	1	1	1	1	1	1	1	1	1	1	1	1	1	1	1	1	1	0	1	1	1	1	1	1	1	1	1	1	1	1	1	1	1	1	1	1	1	1	1	1	1	1	1
3-oxotridecanoyl-[ACP]	0	0	0	0	0	0	0	0	0	0	0	0	0	0	0	0	0	0	0	0	0	0	0	1	0	0	0	0	0	0	0	0	0	0	0	0	0	0	0	0	0	0	0	1	0	0	0	0	0
3-oxoundecanoyl-CoA	1	1	1	1	1	1	1	1	1	1	1	1	1	1	1	1	1	1	1	1	1	1	1	0	1	1	1	1	1	1	1	1	1	1	1	1	1	1	1	1	1	1	1	1	1	1	1	1	1
3-phospho-D-glycerate	1	1	1	1	1	1	1	1	1	1	1	1	1	1	1	1	1	1	1	1	1	1	1	1	1	1	1	1	1	1	1	1	1	1	1	1	1	1	1	1	1	1	1	1	1	1	1	1	1
4,4-dimethyl-14alpha-formyl-5alpha-cholesta-8,24-dien-3beta-ol	0	0	0	0	0	0	0	0	1	0	0	0	0	0	0	0	0	1	0	0	0	0	0	0	0	1	0	0	0	0	0	0	0	0	0	0	0	0	0	0	0	0	0	1	0	0	0	0	0
4,4-dimethyl-14alpha-formyl-5alpha-cholesta-8-en-3beta-ol	1	0	0	0	0	0	0	0	0	1	0	0	0	1	0	0	0	0	0	0	0	0	0	1	0	0	0	1	0	0	0	0	0	0	0	0	1	0	1	0	0	1	1	1	0	0	1	0	0
4,4-dimethyl-14alpha-hydroxymethyl-5alpha-cholesta-8,24-dien-3beta-ol	0	0	0	0	0	0	0	0	1	0	0	0	0	0	0	0	0	1	0	0	0	0	0	0	0	1	0	0	0	0	0	0	0	0	0	0	0	0	0	0	0	0	0	1	0	0	0	0	0
4,4-dimethyl-14alpha-hydroxymethyl-5alpha-cholesta-8-en-3beta-ol	1	0	0	0	0	0	0	0	0	1	0	0	0	1	0	0	0	0	0	0	0	0	0	1	0	0	0	1	0	0	0	0	0	0	0	0	1	0	1	0	0	1	1	1	0	0	1	0	0
4,4-dimethyl-5alpha-cholesta-8,14,24-trien-3beta-ol	0	0	0	0	0	0	0	0	1	0	0	0	0	0	0	0	0	1	0	0	0	0	0	0	0	1	0	0	0	0	0	0	0	0	0	0	0	0	0	0	0	0	0	1	0	0	0	0	0
4,4-dimethyl-5alpha-cholesta-8,14-dien-3-beta-ol	1	0	0	0	0	0	0	0	0	1	0	0	0	1	0	0	0	0	0	0	0	0	0	1	0	0	0	1	0	0	0	0	0	0	0	0	1	0	1	0	0	1	1	1	0	0	1	0	0
4,4-dimethyl-5alpha-cholesta-8-en-3-beta-ol	1	0	0	0	0	0	0	0	0	1	0	0	0	1	0	0	0	0	0	0	0	0	0	1	0	0	0	1	0	0	0	0	0	0	0	0	1	0	1	0	0	1	1	1	0	0	1	0	0
4-aminobutanal	0	0	0	0	0	0	0	0	0	0	0	0	0	0	0	0	0	0	0	0	0	0	0	0	0	0	0	0	0	0	0	0	0	0	0	0	0	0	0	0	0	0	0	1	0	0	0	0	0
4-aminobutyrate	0	0	0	0	0	0	0	0	0	0	0	0	0	0	0	0	0	0	0	0	0	0	0	0	0	0	0	0	0	0	0	0	0	0	0	0	0	0	0	0	0	0	0	1	0	0	0	0	0
4-cis-decenoyl-CoA	1	0	0	1	0	1	1	1	1	1	1	1	0	1	1	1	1	0	1	1	1	0	0	0	0	1	1	1	1	1	1	0	1	1	1	1	0	0	0	1	0	0	1	1	1	1	1	0	0
4-hydroxy-2-oxoglutarate	0	0	0	0	0	0	0	0	0	0	0	0	1	1	0	0	0	1	1	0	0	0	0	0	0	0	0	0	0	1	0	0	0	0	1	0	0	0	1	0	0	1	0	0	0	0	0	0	0
4-methylthio-2-oxobutanoic acid	0	0	0	1	0	0	0	0	0	0	0	0	0	0	0	0	0	0	1	0	0	1	0	0	0	0	1	0	0	0	1	0	0	0	1	0	0	0	0	0	0	0	0	0	0	0	0	0	0
4alpha-carboxy-4beta-methyl-5alpha-cholesta-8,24-dien-3beta-ol	0	0	0	0	0	0	0	0	1	0	0	0	0	0	0	0	0	1	0	0	0	0	0	0	0	1	0	0	0	0	0	0	0	0	0	0	0	0	0	0	0	0	0	1	0	0	0	0	0
4alpha-carboxy-4beta-methyl-5alpha-cholesta-8-en-3beta-ol	1	0	0	0	0	0	0	0	0	1	0	0	0	1	0	0	0	0	0	0	0	0	0	1	0	0	0	1	0	0	0	0	0	0	0	0	1	0	1	0	0	1	1	1	0	0	1	0	0
4alpha-carboxy-5alpha-cholesta-8,24-dien-3beta-ol	0	0	0	0	0	0	0	0	1	0	0	0	0	0	0	0	0	1	0	0	0	0	0	0	0	1	0	0	0	0	0	0	0	0	0	0	0	0	0	0	0	0	0	1	0	0	0	0	0
4alpha-carboxy-5alpha-cholesta-8-en-3beta-ol	1	0	0	0	0	0	0	0	0	1	0	0	0	1	0	0	0	0	0	0	0	0	0	1	0	0	0	1	0	0	0	0	0	0	0	0	1	0	1	0	0	1	1	1	0	0	1	0	0
4alpha-formyl-4beta-methyl-5alpha-cholesta-8,24-dien-3beta-ol	0	0	0	0	0	0	0	0	1	0	0	0	0	0	0	0	0	1	0	0	0	0	0	0	0	1	0	0	0	0	0	0	0	0	0	0	0	0	0	0	0	0	0	1	0	0	0	0	0
4alpha-formyl-4beta-methyl-5alpha-cholesta-8-en-3beta-ol	1	0	0	0	0	0	0	0	0	1	0	0	0	1	0	0	0	0	0	0	0	0	0	1	0	0	0	1	0	0	0	0	0	0	0	0	1	0	1	0	0	1	1	1	0	0	1	0	0
4alpha-formyl-5alpha-cholesta-8,24-dien-3beta-ol	0	0	0	0	0	0	0	0	1	0	0	0	0	0	0	0	0	1	0	0	0	0	0	0	0	1	0	0	0	0	0	0	0	0	0	0	0	0	0	0	0	0	0	1	0	0	0	0	0
4alpha-formyl-5alpha-cholesta-8-en-3beta-ol	1	0	0	0	0	0	0	0	0	1	0	0	0	1	0	0	0	0	0	0	0	0	0	1	0	0	0	1	0	0	0	0	0	0	0	0	1	0	1	0	0	1	1	1	0	0	1	0	0
4alpha-hydroxymethyl-4beta-methyl-5alpha-cholesta-8,24-dien-3beta-ol	0	0	0	0	0	0	0	0	1	0	0	0	0	0	0	0	0	1	0	0	0	0	0	0	0	1	0	0	0	0	0	0	0	0	0	0	0	0	0	0	0	0	0	1	0	0	0	0	0
4alpha-hydroxymethyl-4beta-methyl-5alpha-cholesta-8-en-3beta-ol	1	0	0	0	0	0	0	0	0	1	0	0	0	1	0	0	0	0	0	0	0	0	0	1	0	0	0	1	0	0	0	0	0	0	0	0	1	0	1	0	0	1	1	1	0	0	1	0	0
4alpha-hydroxymethyl-5alpha-cholesta-8,24-dien-3beta-ol	0	0	0	0	0	0	0	0	1	0	0	0	0	0	0	0	0	1	0	0	0	0	0	0	0	1	0	0	0	0	0	0	0	0	0	0	0	0	0	0	0	0	0	1	0	0	0	0	0
4alpha-hydroxymethyl-5alpha-cholesta-8-en-3beta-ol	1	0	0	0	0	0	0	0	0	1	0	0	0	1	0	0	0	0	0	0	0	0	0	1	0	0	0	1	0	0	0	0	0	0	0	0	1	0	1	0	0	1	1	1	0	0	1	0	0
4alpha-methyl-5alpha-cholesta-8-en-3-one	1	0	0	0	0	0	0	0	0	1	0	0	0	1	0	0	0	0	0	0	0	0	0	1	0	0	0	1	0	0	0	0	0	0	0	0	1	0	1	0	0	1	1	1	0	0	1	0	0
4alpha-methyl-cholesta-8-enol	1	0	0	0	0	0	0	0	0	1	0	0	0	1	0	0	0	0	0	0	0	0	0	1	0	0	0	1	0	0	0	0	0	0	0	0	1	0	1	0	0	1	1	1	0	0	1	0	0
4alpha-methylzymosterol	0	0	0	0	0	0	0	0	1	0	0	0	0	0	0	0	0	1	0	0	0	0	0	0	0	1	0	0	0	0	0	0	0	0	0	0	0	0	0	0	0	0	0	1	0	0	0	0	0
5,10-methenyl-THF	1	1	1	1	1	1	1	1	1	1	1	1	1	1	1	1	1	1	1	1	1	1	1	1	1	1	1	1	1	1	1	1	1	1	1	1	1	1	1	1	1	1	1	1	1	1	1	1	1
5,10-methylene-THF	1	1	1	1	1	1	1	1	1	1	1	1	1	1	1	1	1	1	1	1	1	1	1	1	1	1	1	1	1	1	1	1	1	1	1	1	1	1	1	1	1	1	1	1	1	1	1	1	1
5-methyl-THF	1	1	1	0	1	0	0	0	1	0	0	0	0	0	0	0	0	0	0	0	0	0	0	1	0	0	0	0	0	0	0	0	0	0	0	0	0	0	0	1	0	0	1	1	0	0	0	0	0
5-methylthioadenosine	0	0	0	0	0	0	0	0	0	0	0	0	0	0	0	0	0	0	1	0	0	0	0	0	0	0	0	0	0	0	0	0	0	0	0	0	0	0	0	0	0	0	0	1	0	0	0	0	0
5-phosphoribosyl-4-carboxy-5-aminoimidazole	1	1	1	1	1	1	1	1	1	1	1	1	1	1	1	1	1	1	1	1	1	1	1	1	1	1	1	1	1	1	1	1	1	1	1	1	1	1	1	1	1	1	1	1	1	1	1	1	1
5-phosphoribosylamine	1	1	1	1	1	1	1	1	1	1	1	1	1	1	1	1	1	1	1	1	1	1	1	1	1	1	1	1	1	1	1	1	1	1	1	1	1	1	1	1	1	1	1	1	1	1	1	1	1
5-phosphoribosylformylglycinamidine	1	1	1	1	1	1	1	1	1	1	1	1	1	1	1	1	1	1	1	1	1	1	1	1	1	1	1	1	1	1	1	1	1	1	1	1	1	1	1	1	1	1	1	1	1	1	1	1	1
5-tetradecenoyl-CoA	1	1	1	1	1	1	1	1	1	1	1	1	1	1	1	1	1	1	1	1	1	1	1	1	1	1	1	1	1	1	1	1	1	1	1	1	1	1	1	1	1	1	1	1	1	1	1	1	1
5alpha-cholesta-7,24-dien-3beta-ol	0	0	0	0	0	0	0	0	1	0	0	0	0	0	0	0	0	1	0	0	0	0	0	0	0	0	0	0	0	0	0	0	0	0	0	0	0	0	0	0	0	0	0	1	0	0	0	0	0
5alpha-cholesta-8,24-dien-3-one	0	0	0	0	0	0	0	0	1	0	0	0	0	0	0	0	0	1	0	0	0	0	0	0	0	1	0	0	0	0	0	0	0	0	0	0	0	0	0	0	0	0	0	1	0	0	0	0	0
5alpha-cholesta-8-en-3-one	1	0	0	0	0	0	0	0	0	1	0	0	0	1	0	0	0	0	0	0	0	0	0	1	0	0	0	1	0	0	0	0	0	0	0	0	1	0	1	0	0	1	1	1	0	0	1	0	0
6-phospho-D-gluconate	0	0	0	0	0	0	0	1	0	0	0	0	0	0	0	0	0	0	0	0	0	0	0	1	0	0	0	0	0	0	0	0	0	0	0	0	0	0	0	0	0	0	0	1	0	0	0	0	0
7-dehydrodesmosterol	0	0	0	0	0	0	0	0	1	0	0	0	0	0	0	0	0	1	0	0	0	0	0	0	0	0	0	0	0	0	0	0	0	0	0	0	0	0	0	0	0	0	0	1	0	0	0	0	0
7-hexadecenoyl-CoA	1	1	1	1	1	1	1	1	1	1	1	1	1	1	1	1	1	1	1	1	1	1	1	1	1	1	1	1	1	1	1	1	1	1	1	1	1	1	1	1	1	1	1	1	1	1	1	1	1
7-palmitoleic acid	1	1	1	1	1	1	1	1	1	1	1	1	1	1	1	1	1	1	1	1	1	1	1	1	1	1	1	1	1	1	1	1	1	1	1	1	1	1	1	1	1	1	1	1	1	1	1	1	1
8,11-eicosadienoic acid	1	1	1	1	1	1	1	1	1	1	1	1	1	1	1	1	1	1	1	1	1	1	1	1	1	1	1	1	1	1	1	1	1	1	1	1	1	1	1	1	1	1	1	1	1	1	1	1	1
9-eicosenoic acid	1	1	1	1	1	1	1	1	1	1	1	1	1	1	1	1	1	1	1	1	1	1	1	1	1	1	1	1	1	1	1	1	1	1	1	1	1	1	1	1	1	1	1	1	1	1	1	1	1
9-eicosenoyl-CoA	1	1	1	1	1	1	1	1	1	1	1	1	1	1	1	1	1	1	1	1	1	1	1	1	1	1	1	1	1	1	1	1	1	1	1	1	1	1	1	1	1	1	1	1	1	1	1	1	1
9-heptadecenoyl-CoA	1	1	1	1	1	1	1	1	1	1	1	1	1	1	1	1	1	1	1	1	1	1	1	1	1	1	1	1	1	1	1	1	1	1	1	1	1	1	1	1	1	1	1	1	1	1	1	1	1
9-heptadecylenic acid	1	1	1	1	1	1	1	1	1	1	1	1	1	1	1	1	1	1	1	1	1	1	1	1	1	1	1	1	1	1	1	1	1	1	1	1	1	1	1	1	1	1	1	1	1	1	1	1	1
ADP	1	1	1	1	1	1	1	1	1	1	1	1	1	1	1	1	1	1	1	1	1	1	1	1	1	1	1	1	1	1	1	1	1	1	1	1	1	1	1	1	1	1	1	1	1	1	1	1	1
AICAR	1	1	1	1	1	1	1	1	1	1	1	1	1	1	1	1	1	1	1	1	1	1	1	1	1	1	1	1	1	1	1	1	1	1	1	1	1	1	1	1	1	1	1	1	1	1	1	1	1
AIR	1	1	1	1	1	1	1	1	1	1	1	1	1	1	1	1	1	1	1	1	1	1	1	1	1	1	1	1	1	1	1	1	1	1	1	1	1	1	1	1	1	1	1	1	1	1	1	1	1
AKG	1	1	1	1	1	1	1	1	1	1	1	1	1	1	1	1	1	1	1	1	1	1	1	1	1	1	1	1	1	1	1	1	1	1	1	1	1	1	1	1	1	1	1	1	1	1	1	1	1
AMP	1	1	1	1	1	1	1	1	1	1	1	1	1	1	1	1	1	1	1	1	1	1	1	1	1	1	1	1	1	1	1	1	1	1	1	1	1	1	1	1	1	1	1	1	1	1	1	1	1
ATP	1	1	1	1	1	1	1	1	1	1	1	1	1	1	1	1	1	1	1	1	1	1	1	1	1	1	1	1	1	1	1	1	1	1	1	1	1	1	1	1	1	1	1	1	1	1	1	1	1
CDP	1	1	1	1	1	1	1	1	1	1	1	1	1	1	1	1	1	1	1	1	1	1	1	1	1	1	1	1	1	1	1	1	1	1	1	1	1	1	1	1	1	1	1	1	1	1	1	1	1
CDP-choline	1	1	1	1	1	1	1	1	1	1	1	1	1	1	1	1	1	1	1	1	1	1	1	1	1	1	1	1	1	1	1	1	1	1	1	1	1	1	1	1	1	1	1	1	1	1	1	1	1
CDP-diacylglycerol-CL pool	1	1	1	1	1	1	1	1	1	1	1	1	1	1	1	1	1	1	1	1	1	1	1	1	1	1	1	1	1	1	1	1	1	1	1	1	1	1	1	1	1	1	1	1	1	1	1	1	1
CDP-diacylglycerol-LD-PI pool	1	1	1	1	1	1	1	1	1	1	1	1	1	1	1	1	1	1	1	1	1	1	1	1	1	1	1	1	1	1	1	1	1	1	1	1	1	1	1	1	1	1	1	1	1	1	1	1	1
CDP-ethanolamine	1	1	1	1	1	1	1	1	1	1	1	1	1	1	1	1	1	1	1	1	1	1	1	1	1	1	1	1	1	1	1	1	1	1	1	1	1	1	1	1	1	1	1	1	1	1	1	1	1
CL pool	1	1	1	1	1	1	1	1	1	1	1	1	1	1	1	1	1	1	1	1	1	1	1	1	1	1	1	1	1	1	1	1	1	1	1	1	1	1	1	1	1	1	1	1	1	1	1	1	1
CMP	1	1	1	1	1	1	1	1	1	1	1	1	1	1	1	1	1	1	1	1	1	1	1	1	1	1	1	1	1	1	1	1	1	1	1	1	1	1	1	1	1	1	1	1	1	1	1	1	1
CO2	1	1	1	1	1	1	1	1	1	1	1	1	1	1	1	1	1	1	1	1	1	1	1	1	1	1	1	1	1	1	1	1	1	1	1	1	1	1	1	1	1	1	1	1	1	1	1	1	1
CTP	1	1	1	1	1	1	1	1	1	1	1	1	1	1	1	1	1	1	1	1	1	1	1	1	1	1	1	1	1	1	1	1	1	1	1	1	1	1	1	1	1	1	1	1	1	1	1	1	1
CoA	1	1	1	1	1	1	1	1	1	1	1	1	1	1	1	1	1	1	1	1	1	1	1	1	1	1	1	1	1	1	1	1	1	1	1	1	1	1	1	1	1	1	1	1	1	1	1	1	1
D-galactosyl-N-acylsphingosine	0	0	1	0	0	0	0	0	0	0	0	0	0	0	0	0	0	0	0	0	0	0	0	1	0	0	0	0	0	0	0	0	0	0	0	0	0	0	0	0	0	0	0	1	0	0	0	0	0
D-myo-inositol-1,4,5-trisphosphate	0	0	0	0	0	0	0	0	0	0	0	1	0	0	0	0	0	0	0	0	1	0	1	0	1	0	0	0	0	0	0	0	0	0	1	0	0	0	0	0	0	0	0	1	0	0	0	0	0
D-xylulose-5-phosphate	1	1	1	1	1	1	1	1	1	1	1	1	1	1	1	1	1	1	1	1	1	1	1	1	1	1	1	1	1	1	1	1	1	1	1	1	1	1	1	1	1	1	1	1	1	1	1	1	1
DHA	1	1	1	1	1	1	1	1	1	1	1	1	1	1	1	1	1	1	1	1	1	1	1	1	1	1	1	1	1	1	1	1	1	1	1	1	1	1	1	1	1	1	1	1	1	1	1	1	1
DHAP	1	1	1	1	1	1	1	1	1	1	1	1	1	1	1	1	1	1	1	1	1	1	1	1	1	1	1	1	1	1	1	1	1	1	1	1	1	1	1	1	1	1	1	1	1	1	1	1	1
DNA	1	1	1	1	1	1	1	1	1	1	1	1	1	1	1	1	1	1	1	1	1	1	1	1	1	1	1	1	1	1	1	1	1	1	1	1	1	1	1	1	1	1	1	1	1	1	1	1	1
DPA	1	1	1	1	1	1	1	1	1	1	1	1	1	1	1	1	1	1	1	1	1	1	1	1	1	1	1	1	1	1	1	1	1	1	1	1	1	1	1	1	1	1	1	1	1	1	1	1	1
EPA	1	1	1	1	1	1	1	1	1	1	1	1	1	1	1	1	1	1	1	1	1	1	1	1	1	1	1	1	1	1	1	1	1	1	1	1	1	1	1	1	1	1	1	1	1	1	1	1	1
FAD	1	1	1	1	1	1	1	1	1	1	1	1	1	1	1	1	1	1	1	1	1	1	1	1	1	1	1	1	1	1	1	1	1	1	1	1	1	1	1	1	1	1	1	1	1	1	1	1	1
FADH2	1	1	1	1	1	1	1	1	1	1	1	1	1	1	1	1	1	1	1	1	1	1	1	1	1	1	1	1	1	1	1	1	1	1	1	1	1	1	1	1	1	1	1	1	1	1	1	1	1
FAICAR	1	1	1	1	1	1	1	1	1	1	1	1	1	1	1	1	1	1	1	1	1	1	1	1	1	1	1	1	1	1	1	1	1	1	1	1	1	1	1	1	1	1	1	1	1	1	1	1	1
GAP	1	1	1	1	1	1	1	1	1	1	1	1	1	1	1	1	1	1	1	1	1	1	1	1	1	1	1	1	1	1	1	1	1	1	1	1	1	1	1	1	1	1	1	1	1	1	1	1	1
GAR	1	1	1	1	1	1	1	1	1	1	1	1	1	1	1	1	1	1	1	1	1	1	1	1	1	1	1	1	1	1	1	1	1	1	1	1	1	1	1	1	1	1	1	1	1	1	1	1	1
GDP	1	1	1	1	1	1	1	1	1	1	1	1	1	1	1	1	1	1	1	1	1	1	1	1	1	1	1	1	1	1	1	1	1	1	1	1	1	1	1	1	1	1	1	1	1	1	1	1	1
GMP	1	1	1	1	1	1	1	1	1	1	1	1	1	1	1	1	1	1	1	1	1	1	1	1	1	1	1	1	1	1	1	1	1	1	1	1	1	1	1	1	1	1	1	1	1	1	1	1	1
GSH	1	1	0	1	1	1	1	1	1	0	1	1	1	1	1	1	1	0	1	0	1	0	1	1	0	1	1	1	1	1	1	1	1	1	1	0	1	1	1	1	1	1	1	1	1	1	1	1	1
GSSG	1	1	0	1	1	1	1	1	1	0	1	1	1	1	1	1	1	0	1	0	1	0	1	1	0	1	1	1	1	1	1	1	1	1	1	0	1	1	1	1	1	1	1	1	1	1	1	1	1
GTP	1	1	1	1	1	1	1	1	1	1	1	1	1	1	1	1	1	1	1	1	1	1	1	1	1	1	1	1	1	1	1	1	1	1	1	1	1	1	1	1	1	1	1	1	1	1	1	1	1
H+	1	1	1	1	1	1	1	1	1	1	1	1	1	1	1	1	1	1	1	1	1	1	1	1	1	1	1	1	1	1	1	1	1	1	1	1	1	1	1	1	1	1	1	1	1	1	1	1	1
H2O	1	1	1	1	1	1	1	1	1	1	1	1	1	1	1	1	1	1	1	1	1	1	1	1	1	1	1	1	1	1	1	1	1	1	1	1	1	1	1	1	1	1	1	1	1	1	1	1	1
H2O2	1	1	1	1	1	1	1	1	1	1	1	1	1	1	1	1	1	1	1	1	1	1	1	1	1	1	1	1	1	1	1	1	1	1	1	1	1	1	1	1	1	1	1	1	1	1	1	1	1
HCO3-	1	1	1	1	1	1	1	1	1	1	1	1	1	1	1	1	1	1	1	1	1	1	1	1	1	1	1	1	1	1	1	1	1	1	1	1	1	1	1	1	1	1	1	1	1	1	1	1	1
HMG-CoA	1	1	1	1	1	1	1	1	1	1	1	1	1	1	1	1	1	1	1	1	1	1	1	1	1	1	1	1	1	1	1	1	1	1	1	1	1	1	1	1	1	1	1	1	1	1	1	1	1
IDP	0	0	0	0	0	0	0	0	0	0	0	0	0	0	0	0	0	0	0	0	0	0	0	1	0	0	0	0	0	0	0	0	0	0	0	0	0	0	0	0	0	0	0	1	0	0	0	0	1
IMP	1	1	1	1	1	1	1	1	1	1	1	1	1	1	1	1	1	1	1	1	1	1	1	1	1	1	1	1	1	1	1	1	1	1	1	1	1	1	1	1	1	1	1	1	1	1	1	1	1
ITP	0	0	0	0	0	0	0	0	0	0	0	0	0	0	0	0	0	0	0	0	0	0	0	1	0	0	0	0	0	0	0	0	0	0	0	0	0	0	0	0	0	0	0	1	0	0	0	0	1
K+	0	0	0	0	1	0	0	0	0	1	0	0	0	0	0	0	0	0	0	1	0	0	0	1	1	0	0	1	0	0	0	1	0	0	0	1	1	0	1	0	1	0	0	1	1	0	1	0	0
L-1-pyrroline-3-hydroxy-5-carboxylate	1	0	1	0	1	0	1	1	0	1	0	1	1	1	1	1	0	1	1	0	1	0	1	1	1	0	0	1	1	1	0	0	1	0	1	1	1	1	1	1	1	1	1	1	1	1	1	1	1
L-2-amino-3-oxobutanoic acid	0	0	0	1	0	1	0	0	0	0	0	0	0	0	1	0	1	0	0	0	0	1	0	1	1	0	0	0	0	0	0	0	0	0	0	0	0	0	0	0	0	0	0	1	0	1	1	0	0
L-carnitine	1	1	1	1	1	1	1	1	1	1	1	1	1	1	1	1	1	1	1	1	1	1	1	1	1	1	1	1	1	1	1	1	1	1	1	1	1	1	1	1	1	1	1	1	1	1	1	1	1
L-erythro-4-hydroxyglutamate	0	0	0	0	0	0	0	0	0	0	0	0	1	1	0	0	0	1	1	0	0	0	0	0	0	0	0	0	0	1	0	0	0	0	1	0	0	0	1	0	0	1	0	1	0	0	0	0	0
L-glutamate 5-semialdehyde	0	0	1	0	0	0	0	0	0	0	1	0	1	1	0	0	0	1	1	0	0	0	0	1	0	0	0	0	0	1	0	1	0	0	1	0	0	0	1	0	0	1	0	1	0	0	0	0	0
L-octanoylcarnitine	0	1	1	1	1	0	1	1	0	1	0	0	1	1	0	1	0	1	0	0	0	0	0	1	0	1	0	0	0	0	1	1	0	0	0	1	1	1	1	1	1	1	0	1	1	0	1	1	1
L-oleoylcarnitine	1	1	1	1	1	1	1	1	1	1	1	1	1	1	1	1	1	1	1	1	1	1	1	1	1	1	1	1	1	1	1	1	1	1	1	1	1	1	1	1	1	1	1	1	1	1	1	1	1
L-palmitoylcarnitine	0	0	0	1	1	1	0	0	0	0	1	0	0	1	0	1	1	0	1	0	1	1	1	1	0	0	0	1	0	0	1	1	1	0	1	0	1	0	1	1	1	1	0	1	0	1	1	1	0
N-acetylglucosamine-6-phosphate	0	0	0	0	0	0	0	1	0	0	0	0	0	0	0	0	0	0	0	0	0	0	0	1	0	0	0	0	0	0	0	0	0	0	0	0	0	0	0	0	0	0	0	1	0	0	0	0	0
N-carbamoyl-L-aspartate	1	1	1	1	1	1	1	1	1	1	1	1	1	1	1	1	1	1	1	1	1	1	1	1	1	1	1	1	1	1	1	1	1	1	1	1	1	1	1	1	1	1	1	1	1	1	1	1	1
N-formyl-GAR	1	1	1	1	1	1	1	1	1	1	1	1	1	1	1	1	1	1	1	1	1	1	1	1	1	1	1	1	1	1	1	1	1	1	1	1	1	1	1	1	1	1	1	1	1	1	1	1	1
NAD+	1	1	1	1	1	1	1	1	1	1	1	1	1	1	1	1	1	1	1	1	1	1	1	1	1	1	1	1	1	1	1	1	1	1	1	1	1	1	1	1	1	1	1	1	1	1	1	1	1
NADH	1	1	1	1	1	1	1	1	1	1	1	1	1	1	1	1	1	1	1	1	1	1	1	1	1	1	1	1	1	1	1	1	1	1	1	1	1	1	1	1	1	1	1	1	1	1	1	1	1
NADPH	1	1	1	1	1	1	1	1	1	1	1	1	1	1	1	1	1	1	1	1	1	1	1	1	1	1	1	1	1	1	1	1	1	1	1	1	1	1	1	1	1	1	1	1	1	1	1	1	1
NEFA blood pool in	1	1	1	1	1	1	1	1	1	1	1	1	1	1	1	1	1	1	1	1	1	1	1	1	1	1	1	1	1	1	1	1	1	1	1	1	1	1	1	1	1	1	1	1	1	1	1	1	1
NH3	1	1	1	1	1	1	1	1	1	1	1	1	1	1	1	1	1	1	1	1	1	1	1	1	1	1	1	1	1	1	1	1	1	1	1	1	1	1	1	1	1	1	1	1	1	1	1	1	1
Na+	1	1	1	1	1	1	1	1	1	1	1	1	1	1	1	1	1	1	1	1	1	1	1	1	1	1	1	1	1	1	1	1	1	1	1	1	1	1	1	1	1	1	1	1	1	1	1	1	1
O-acetylcarnitine	1	0	0	0	0	0	0	0	1	1	1	1	0	0	0	1	0	0	0	0	1	0	0	1	0	0	1	0	0	0	1	1	0	0	0	1	0	0	0	0	0	1	0	1	0	0	0	0	0
O-propanoylcarnitine	1	1	1	1	1	1	1	1	0	1	1	1	1	0	1	1	1	1	1	1	0	1	1	1	1	1	1	1	1	1	1	1	1	1	1	1	1	1	1	1	1	1	1	1	1	1	1	1	1
O2	1	1	1	1	1	1	1	1	1	1	1	1	1	1	1	1	1	1	1	1	1	1	1	1	1	1	1	1	1	1	1	1	1	1	1	1	1	1	1	1	1	1	1	1	1	1	1	1	1
O2-	0	0	0	0	0	0	0	0	0	0	0	0	0	0	0	1	0	0	1	0	0	0	0	1	0	0	0	0	0	0	0	0	0	0	0	0	0	0	0	0	0	0	0	1	0	0	0	0	0
OAA	1	1	1	1	1	1	1	1	1	1	1	1	1	1	1	1	1	1	1	1	1	1	1	1	1	1	1	1	1	1	1	1	1	1	1	1	1	1	1	1	1	1	1	1	1	1	1	1	1
PAP	0	0	0	0	0	0	0	0	0	1	0	0	1	0	1	0	0	0	0	1	1	0	1	0	0	0	0	0	0	0	0	0	0	0	0	0	0	0	0	0	0	0	0	1	0	0	0	0	0
PAPS	0	0	0	0	0	0	0	0	0	1	0	0	1	0	1	0	0	0	0	1	1	0	1	1	0	0	0	0	0	0	0	0	0	0	0	0	0	0	0	0	0	0	0	1	0	0	0	0	0
PC-LD pool	1	1	1	1	1	1	1	1	1	1	1	1	1	1	1	1	1	1	1	1	1	1	1	1	1	1	1	1	1	1	1	1	1	1	1	1	1	1	1	1	1	1	1	1	1	1	1	1	1
PE-LD pool	1	1	1	1	1	1	1	1	1	1	1	1	1	1	1	1	1	1	1	1	1	1	1	1	1	1	1	1	1	1	1	1	1	1	1	1	1	1	1	1	1	1	1	1	1	1	1	1	1
PE-PS-LD pool	1	1	1	1	1	1	1	1	1	1	1	1	1	1	1	1	1	1	1	1	1	1	1	1	1	1	1	1	1	1	1	1	1	1	1	1	1	1	1	1	1	1	1	1	1	1	1	1	1
PEP	0	0	0	0	0	0	0	1	0	1	0	0	0	0	0	0	0	0	0	0	0	0	0	1	0	0	1	1	0	0	0	0	0	0	0	1	1	0	1	0	1	0	0	1	1	0	0	0	1
PG-CL pool	1	1	1	1	1	1	1	1	1	1	1	1	1	1	1	1	1	1	1	1	1	1	1	1	1	1	1	1	1	1	1	1	1	1	1	1	1	1	1	1	1	1	1	1	1	1	1	1	1
PGP-CL pool	1	1	1	1	1	1	1	1	1	1	1	1	1	1	1	1	1	1	1	1	1	1	1	1	1	1	1	1	1	1	1	1	1	1	1	1	1	1	1	1	1	1	1	1	1	1	1	1	1
PI pool	1	1	1	1	1	1	1	1	1	1	1	1	1	1	1	1	1	1	1	1	1	1	1	1	1	1	1	1	1	1	1	1	1	1	1	1	1	1	1	1	1	1	1	1	1	1	1	1	1
PPi	1	1	1	1	1	1	1	1	1	1	1	1	1	1	1	1	1	1	1	1	1	1	1	1	1	1	1	1	1	1	1	1	1	1	1	1	1	1	1	1	1	1	1	1	1	1	1	1	1
PRPP	1	1	1	1	1	1	1	1	1	1	1	1	1	1	1	1	1	1	1	1	1	1	1	1	1	1	1	1	1	1	1	1	1	1	1	1	1	1	1	1	1	1	1	1	1	1	1	1	1
PS-LD pool	1	1	1	1	1	1	1	1	1	1	1	1	1	1	1	1	1	1	1	1	1	1	1	1	1	1	1	1	1	1	1	1	1	1	1	1	1	1	1	1	1	1	1	1	1	1	1	1	1
Pi	1	1	1	1	1	1	1	1	1	1	1	1	1	1	1	1	1	1	1	1	1	1	1	1	1	1	1	1	1	1	1	1	1	1	1	1	1	1	1	1	1	1	1	1	1	1	1	1	1
RNA	1	1	1	1	1	1	1	1	1	1	1	1	1	1	1	1	1	1	1	1	1	1	1	1	1	1	1	1	1	1	1	1	1	1	1	1	1	1	1	1	1	1	1	1	1	1	1	1	1
S-adenosylmethioninamine	0	0	0	0	0	0	0	0	0	0	0	0	0	0	0	0	0	0	1	0	0	0	0	0	0	0	0	0	0	0	0	0	0	0	0	0	0	0	0	0	0	0	0	1	0	0	0	0	0
S-glutathionyl-2-4-dinitrobenzene	0	0	0	0	0	0	0	0	0	0	0	0	0	0	0	0	0	0	0	0	0	0	0	0	0	0	0	0	0	0	0	0	0	0	0	0	0	0	0	0	0	0	0	1	0	0	0	0	0
S-glutathionyl-ethacrynic acid	0	0	0	0	0	0	0	0	0	0	0	0	0	0	0	0	0	0	0	0	0	0	0	1	0	0	0	0	0	0	0	0	0	0	0	0	0	0	0	0	0	0	0	1	0	0	0	0	0
S-methyl-5-thio-D-ribulose-1-phosphate	0	0	0	0	0	0	0	0	0	0	0	0	0	0	0	0	0	0	1	0	0	0	0	0	0	0	0	0	0	0	0	0	0	0	0	0	0	0	0	0	0	0	0	1	0	0	0	0	0
S-succinyldihydrolipoamide	0	0	0	0	0	0	0	0	0	0	0	0	0	0	0	0	0	0	0	0	0	0	0	1	0	0	0	1	0	0	0	0	0	0	0	0	0	0	0	0	0	0	0	1	0	0	0	0	0
SAH	1	1	1	0	1	0	0	0	1	0	0	0	0	0	0	0	0	0	0	0	0	0	0	1	0	0	0	0	0	0	0	0	0	0	0	0	0	0	0	1	0	0	1	1	0	0	0	0	0
SAICAR	1	1	1	1	1	1	1	1	1	1	1	1	1	1	1	1	1	1	1	1	1	1	1	1	1	1	1	1	1	1	1	1	1	1	1	1	1	1	1	1	1	1	1	1	1	1	1	1	1
SAM	1	1	1	0	1	0	0	0	1	0	0	0	0	0	0	0	0	0	1	0	0	0	0	1	0	0	0	0	0	0	0	0	0	0	0	0	0	0	0	1	0	0	1	1	0	0	0	0	0
SM pool	1	1	1	1	1	1	1	1	1	1	1	1	1	1	1	1	1	1	1	1	1	1	1	1	1	1	1	1	1	1	1	1	1	1	1	1	1	1	1	1	1	1	1	1	1	1	1	1	1
TAG-LD pool	1	1	1	1	1	1	1	1	1	1	1	1	1	1	1	1	1	1	1	1	1	1	1	1	1	1	1	1	1	1	1	1	1	1	1	1	1	1	1	1	1	1	1	1	1	1	1	1	1
THF	1	1	1	1	1	1	1	1	1	1	1	1	1	1	1	1	1	1	1	1	1	1	1	1	1	1	1	1	1	1	1	1	1	1	1	1	1	1	1	1	1	1	1	1	1	1	1	1	1
UDP	1	1	1	1	1	1	1	1	1	1	1	1	1	1	1	1	1	1	1	1	1	1	1	1	1	1	1	1	1	1	1	1	1	1	1	1	1	1	1	1	1	1	1	1	1	1	1	1	1
UDP-galactose	0	0	1	0	0	0	0	0	0	0	0	0	0	0	0	0	0	0	0	0	0	0	0	1	0	0	0	0	0	0	0	0	0	0	0	0	0	0	0	0	0	0	0	1	0	0	0	0	0
UDP-glucose	1	1	1	1	1	1	1	1	1	1	1	1	1	1	1	1	1	1	1	1	1	1	1	1	1	1	1	1	1	1	1	1	1	1	1	1	1	1	1	1	1	1	1	1	1	1	1	1	1
UMP	1	1	1	1	1	1	1	1	1	1	1	1	1	1	1	1	1	1	1	1	1	1	1	1	1	1	1	1	1	1	1	1	1	1	1	1	1	1	1	1	1	1	1	1	1	1	1	1	1
UTP	1	1	1	1	1	1	1	1	1	1	1	1	1	1	1	1	1	1	1	1	1	1	1	1	1	1	1	1	1	1	1	1	1	1	1	1	1	1	1	1	1	1	1	1	1	1	1	1	1
[ACP]	1	1	1	1	1	1	1	1	1	1	1	1	1	1	1	1	1	1	1	1	1	1	1	1	1	1	1	1	1	1	1	1	1	1	1	1	1	1	1	1	1	1	1	1	1	1	1	1	1
acetaldehyde	0	0	0	0	0	0	0	1	0	1	0	0	0	1	0	0	0	0	0	0	0	0	0	1	0	0	0	1	0	0	0	0	0	0	0	1	0	0	0	0	0	0	0	1	1	0	0	0	0
acetate	0	0	0	0	0	0	0	1	0	1	0	1	1	1	0	0	0	0	1	0	0	0	0	1	1	0	0	1	1	0	0	0	1	0	0	1	1	0	0	0	0	0	0	1	1	0	1	0	0
acetoacetyl-CoA	1	1	1	1	1	1	1	1	1	1	1	1	1	1	1	1	1	1	1	1	1	1	1	1	1	1	1	1	1	1	1	1	1	1	1	1	1	1	1	1	1	1	1	1	1	1	1	1	1
acetyl adenylate	0	0	0	0	0	0	0	0	0	0	0	0	0	0	0	0	0	0	0	0	0	0	0	0	0	0	0	0	0	0	0	0	0	0	0	0	0	0	0	0	0	0	0	1	0	0	0	0	0
acetyl-CoA	1	1	1	1	1	1	1	1	1	1	1	1	1	1	1	1	1	1	1	1	1	1	1	1	1	1	1	1	1	1	1	1	1	1	1	1	1	1	1	1	1	1	1	1	1	1	1	1	1
acetylcholine	0	0	0	0	0	0	0	0	0	0	0	0	0	0	0	0	0	0	0	0	0	0	0	1	0	0	0	0	0	0	0	0	0	0	0	0	0	0	0	0	0	0	0	0	0	0	0	0	0
acrylyl-CoA	0	0	0	0	0	0	0	0	0	0	0	0	0	0	0	0	0	0	0	0	1	1	0	1	0	0	0	0	0	0	0	0	0	0	0	0	0	0	0	1	0	0	0	1	0	0	0	0	0
acyl-CoA-CL pool	1	1	1	1	1	1	1	1	1	1	1	1	1	1	1	1	1	1	1	1	1	1	1	1	1	1	1	1	1	1	1	1	1	1	1	1	1	1	1	1	1	1	1	1	1	1	1	1	1
acyl-CoA-LD-PC pool	1	1	1	1	1	1	1	1	1	1	1	1	1	1	1	1	1	1	1	1	1	1	1	1	1	1	1	1	1	1	1	1	1	1	1	1	1	1	1	1	1	1	1	1	1	1	1	1	1
acyl-CoA-LD-PE pool	0	0	1	0	1	0	0	0	0	0	1	1	0	0	1	0	1	0	1	0	0	0	1	1	0	0	0	1	1	0	0	0	0	0	0	0	0	0	1	1	1	1	1	0	0	1	1	0	0
acyl-CoA-LD-PI pool	1	1	1	1	1	1	1	1	1	1	1	1	1	1	1	1	1	1	1	1	1	1	1	1	1	1	1	1	1	1	1	1	1	1	1	1	1	1	1	1	1	1	1	1	1	1	1	1	1
acyl-CoA-LD-PS pool	0	0	0	1	1	0	0	1	0	1	0	0	0	1	0	0	0	1	0	1	1	1	0	1	1	1	1	0	0	1	0	1	1	1	0	1	0	1	0	1	0	0	1	0	1	0	0	1	0
acyl-CoA-LD-SM pool	1	1	0	0	0	0	1	1	0	1	1	1	1	0	1	0	0	1	1	1	1	1	0	1	1	1	1	0	0	1	1	1	0	1	1	1	0	1	1	0	0	0	1	1	1	0	0	1	1
acyl-CoA-LD-TG2 pool	0	0	0	0	0	0	0	0	0	0	0	0	1	0	0	0	0	0	1	0	0	0	0	0	0	0	0	0	1	0	1	0	0	0	0	0	0	0	0	0	0	0	0	0	1	0	0	0	1
acyl-CoA-LD-TG3 pool	1	1	1	1	1	1	1	1	1	1	1	1	1	1	1	1	1	1	1	1	1	1	1	1	1	1	1	1	1	1	1	1	1	1	1	1	1	1	1	1	1	1	1	1	1	1	1	1	1
acylglycerone-phosphate	0	0	0	0	0	0	0	0	0	0	0	0	1	0	0	0	0	0	1	0	0	0	0	1	0	0	0	0	0	0	0	0	0	0	0	0	0	0	0	0	0	0	0	1	0	0	0	0	0
adenine	0	0	0	0	0	0	0	1	0	1	0	0	0	0	1	0	1	0	1	0	1	0	0	1	0	0	0	1	0	0	1	0	0	0	0	1	1	0	1	0	1	1	0	1	0	0	0	0	1
adenosine	1	1	1	0	1	0	0	0	1	1	0	0	0	0	0	0	0	0	0	0	1	0	0	1	0	0	0	1	0	0	0	0	0	0	0	1	0	0	1	1	1	0	1	1	0	0	0	0	1
adenylosuccinate	1	1	1	1	1	1	1	1	1	1	1	1	1	1	1	1	1	1	1	1	1	1	1	1	1	1	1	1	1	1	1	1	1	1	1	1	1	1	1	1	1	1	1	1	1	1	1	1	1
adenylyl sulfate	0	0	0	0	0	0	0	0	0	1	0	0	1	0	1	0	0	0	0	1	1	0	1	1	0	0	0	0	0	0	0	0	0	0	0	0	0	0	0	0	0	0	0	1	0	0	0	0	0
adrenic acid	1	1	1	1	1	1	1	1	1	1	1	1	1	1	1	1	1	1	1	1	1	1	1	1	1	1	1	1	1	1	1	1	1	1	1	1	1	1	1	1	1	1	1	1	1	1	1	1	1
alanine	1	1	1	1	1	1	1	1	1	1	1	1	1	1	1	1	1	1	1	1	1	1	1	1	1	1	1	1	1	1	1	1	1	1	1	1	1	1	1	1	1	1	1	1	1	1	1	1	1
alloxan	0	0	0	0	0	0	0	0	0	0	0	0	0	0	0	0	0	0	0	0	0	0	0	1	0	0	0	0	0	0	0	0	0	0	0	0	0	0	0	0	0	0	0	1	0	0	0	0	0
alpha-D-galactose-1-phosphate	0	0	0	0	0	0	0	0	0	0	0	0	0	0	0	0	0	0	0	0	0	0	0	1	0	0	0	0	0	0	0	0	0	0	0	0	0	0	0	0	0	0	0	1	0	0	0	0	0
aminoacetone	0	0	0	1	0	1	0	0	0	0	0	0	0	0	1	0	1	0	0	0	0	1	0	0	1	0	0	0	0	0	0	0	0	0	0	0	0	0	0	0	0	0	0	1	0	1	1	0	0
apoC-lys_btn	0	0	0	1	1	1	0	0	1	1	1	1	0	0	1	0	0	0	1	0	0	0	1	1	1	1	1	0	1	0	1	1	0	1	0	0	0	1	1	1	1	1	1	1	0	0	1	0	1
arachidonate	1	1	1	1	1	1	1	1	1	1	1	1	1	1	1	1	1	1	1	1	1	1	1	1	1	1	1	1	1	1	1	1	1	1	1	1	1	1	1	1	1	1	1	1	1	1	1	1	1
arachidonyl-CoA	1	1	1	1	1	1	1	1	1	1	1	1	1	1	1	1	1	1	1	1	1	1	1	1	1	1	1	1	1	1	1	1	1	1	1	1	1	1	1	1	1	1	1	1	1	1	1	1	1
arachidonyl-carnitine	1	1	1	1	1	1	1	1	1	1	1	1	1	1	1	1	1	1	1	1	1	1	1	1	1	1	1	1	1	1	1	1	1	1	1	1	1	1	1	1	1	1	1	1	1	1	1	1	1
arginine	1	1	1	1	1	1	1	1	1	1	1	1	1	1	1	1	1	1	1	1	1	1	1	1	1	1	1	1	1	1	1	1	1	1	1	1	1	1	1	1	1	1	1	1	1	1	1	1	1
asparagine	1	1	1	1	1	1	1	1	1	1	1	1	1	1	1	1	1	1	1	1	1	1	1	1	1	1	1	1	1	1	1	1	1	1	1	1	1	1	1	1	1	1	1	1	1	1	1	1	1
aspartate	1	1	1	1	1	1	1	1	1	1	1	1	1	1	1	1	1	1	1	1	1	1	1	1	1	1	1	1	1	1	1	1	1	1	1	1	1	1	1	1	1	1	1	1	1	1	1	1	1
behenic acid	1	1	1	1	1	1	1	1	1	1	1	1	1	1	1	1	1	1	1	1	1	1	1	1	1	1	1	1	1	1	1	1	1	1	1	1	1	1	1	1	1	1	1	1	1	1	1	1	1
beta-D-glucose	0	0	0	0	0	0	0	0	0	0	0	0	0	0	0	0	0	0	0	0	0	0	0	1	0	0	0	0	0	0	0	0	0	0	0	0	0	0	0	0	0	0	0	1	0	0	0	0	0
beta-D-glucose-6-phosphate	0	0	0	0	0	0	0	0	0	0	0	0	0	0	0	0	0	0	0	0	0	0	0	1	0	0	0	0	0	0	0	0	0	0	0	0	0	0	0	0	0	0	0	1	0	0	0	0	0
beta-alanine	0	0	0	0	0	0	0	0	0	0	0	0	0	0	0	0	0	0	1	0	0	0	0	0	0	0	0	0	0	0	0	0	0	0	0	0	0	0	0	0	0	0	0	1	0	0	0	0	0
bilirubin	0	0	0	0	0	0	0	0	0	0	0	0	0	0	0	0	0	0	0	0	0	0	0	0	0	0	0	0	0	0	0	0	0	0	0	0	0	0	0	0	0	0	0	0	0	0	0	0	0
butyryl-CoA	1	1	1	1	1	1	1	1	1	1	1	1	1	1	1	1	1	1	1	1	1	1	1	1	1	1	1	1	1	1	1	1	1	1	1	1	1	1	1	1	1	1	1	1	1	1	1	1	1
carbamoyl-phosphate	1	1	1	1	1	1	1	1	1	1	1	1	1	1	1	1	1	1	1	1	1	1	1	1	1	1	1	1	1	1	1	1	1	1	1	1	1	1	1	1	1	1	1	1	1	1	1	1	1
carboxybiotin-carboxyl-carrier	0	0	0	1	1	1	0	0	1	1	1	1	0	0	1	0	0	0	1	0	0	0	1	1	1	1	1	0	1	0	1	1	0	1	0	0	0	1	1	1	1	1	1	1	0	0	1	0	1
ceramide pool	1	1	1	1	1	1	1	1	1	1	1	1	1	1	1	1	1	1	1	1	1	1	1	1	1	1	1	1	1	1	1	1	1	1	1	1	1	1	1	1	1	1	1	1	1	1	1	1	1
cerotic acid	1	1	1	1	1	1	1	1	1	1	1	1	1	1	1	1	1	1	1	1	1	1	1	1	1	1	1	1	1	1	1	1	1	1	1	1	1	1	1	1	1	1	1	1	1	1	1	1	1
chenodeoxycholoyl-CoA	0	0	0	0	0	0	0	0	0	0	0	0	0	0	0	0	0	0	0	0	0	0	0	0	0	0	0	0	0	0	0	0	0	0	0	0	0	0	0	0	1	0	0	1	0	0	0	0	0
chenodiol	0	0	0	0	0	0	0	0	0	0	0	0	0	0	0	0	0	0	0	0	0	0	0	0	0	0	0	0	0	0	0	0	0	0	0	0	0	0	0	0	1	0	0	1	0	0	0	0	0
chloride	0	0	0	0	0	0	0	0	0	0	0	0	0	0	0	0	0	0	0	0	0	0	0	1	0	0	0	0	0	0	0	0	0	0	0	0	0	0	0	0	0	0	0	1	0	0	0	0	0
cholate	0	0	0	0	0	0	0	0	0	0	0	0	0	0	0	0	0	0	0	0	0	0	0	0	0	0	0	0	0	0	0	0	0	0	0	0	0	0	0	0	0	0	0	1	0	0	0	0	0
cholestenol	1	0	0	0	0	0	0	0	0	1	0	0	0	1	0	0	0	0	0	0	0	0	0	1	0	0	0	1	0	0	0	0	0	0	0	0	1	0	1	0	0	1	1	1	0	0	1	0	0
cholesterol	1	1	1	1	1	1	1	1	1	1	1	1	1	1	1	1	1	1	1	1	1	1	1	1	1	1	1	1	1	1	1	1	1	1	1	1	1	1	1	1	1	1	1	1	1	1	1	1	1
cholesterol-ester pool	1	1	1	1	1	1	1	1	1	1	1	1	1	1	1	1	1	1	1	1	1	1	1	1	1	1	1	1	1	1	1	1	1	1	1	1	1	1	1	1	1	1	1	1	1	1	1	1	1
cholesterol-ester-10,13,16,19-docosa	1	1	1	1	1	1	1	1	1	1	1	1	1	1	1	1	1	1	1	1	1	1	1	1	1	1	1	1	1	1	1	1	1	1	1	1	1	1	1	1	1	1	1	1	1	1	1	1	1
cholesterol-ester-10,13,16-docosa	1	1	1	1	1	1	1	1	1	1	1	1	1	1	1	1	1	1	1	1	1	1	1	1	1	1	1	1	1	1	1	1	1	1	1	1	1	1	1	1	1	1	1	1	1	1	1	1	1
cholesterol-ester-10-hepta	1	1	1	1	1	1	1	1	1	1	1	1	1	1	1	1	1	1	1	1	1	1	1	1	1	1	1	1	1	1	1	1	1	1	1	1	1	1	1	1	1	1	1	1	1	1	1	1	1
cholesterol-ester-11,14,17-eico	1	1	1	1	1	1	1	1	1	1	1	1	1	1	1	1	1	1	1	1	1	1	1	1	1	1	1	1	1	1	1	1	1	1	1	1	1	1	1	1	1	1	1	1	1	1	1	1	1
cholesterol-ester-11,14-eicosa	1	1	1	1	1	1	1	1	1	1	1	1	1	1	1	1	1	1	1	1	1	1	1	1	1	1	1	1	1	1	1	1	1	1	1	1	1	1	1	1	1	1	1	1	1	1	1	1	1
cholesterol-ester-11-docose	1	1	1	1	1	1	1	1	1	1	1	1	1	1	1	1	1	1	1	1	1	1	1	1	1	1	1	1	1	1	1	1	1	1	1	1	1	1	1	1	1	1	1	1	1	1	1	1	1
cholesterol-ester-11-eico	1	1	1	1	1	1	1	1	1	1	1	1	1	1	1	1	1	1	1	1	1	1	1	1	1	1	1	1	1	1	1	1	1	1	1	1	1	1	1	1	1	1	1	1	1	1	1	1	1
cholesterol-ester-12,15,18,21-tetracosa	1	1	1	1	1	1	1	1	1	1	1	1	1	1	1	1	1	1	1	1	1	1	1	1	1	1	1	1	1	1	1	1	1	1	1	1	1	1	1	1	1	1	1	1	1	1	1	1	1
cholesterol-ester-13,16,19-doco	1	1	1	1	1	1	1	1	1	1	1	1	1	1	1	1	1	1	1	1	1	1	1	1	1	1	1	1	1	1	1	1	1	1	1	1	1	1	1	1	1	1	1	1	1	1	1	1	1
cholesterol-ester-13,16-docosa	1	1	1	1	1	1	1	1	1	1	1	1	1	1	1	1	1	1	1	1	1	1	1	1	1	1	1	1	1	1	1	1	1	1	1	1	1	1	1	1	1	1	1	1	1	1	1	1	1
cholesterol-ester-13-docose	1	1	1	1	1	1	1	1	1	1	1	1	1	1	1	1	1	1	1	1	1	1	1	1	1	1	1	1	1	1	1	1	1	1	1	1	1	1	1	1	1	1	1	1	1	1	1	1	1
cholesterol-ester-13-octade	1	1	1	1	1	1	1	1	1	1	1	1	1	1	1	1	1	1	1	1	1	1	1	1	1	1	1	1	1	1	1	1	1	1	1	1	1	1	1	1	1	1	1	1	1	1	1	1	1
cholesterol-ester-15-tetra	1	1	1	1	1	1	1	1	1	1	1	1	1	1	1	1	1	1	1	1	1	1	1	1	1	1	1	1	1	1	1	1	1	1	1	1	1	1	1	1	1	1	1	1	1	1	1	1	1
cholesterol-ester-4,7,10,13,16,19-doco	1	1	1	1	1	1	1	1	1	1	1	1	1	1	1	1	1	1	1	1	1	1	1	1	1	1	1	1	1	1	1	1	1	1	1	1	1	1	1	1	1	1	1	1	1	1	1	1	1
cholesterol-ester-4,7,10,13,16-docosa	1	1	1	1	1	1	1	1	1	1	1	1	1	1	1	1	1	1	1	1	1	1	1	1	1	1	1	1	1	1	1	1	1	1	1	1	1	1	1	1	1	1	1	1	1	1	1	1	1
cholesterol-ester-5,8,11,14,17-eico	1	1	1	1	1	1	1	1	1	1	1	1	1	1	1	1	1	1	1	1	1	1	1	1	1	1	1	1	1	1	1	1	1	1	1	1	1	1	1	1	1	1	1	1	1	1	1	1	1
cholesterol-ester-5,8,11-eico	1	1	1	1	1	1	1	1	1	1	1	1	1	1	1	1	1	1	1	1	1	1	1	1	1	1	1	1	1	1	1	1	1	1	1	1	1	1	1	1	1	1	1	1	1	1	1	1	1
cholesterol-ester-5-tetra	1	1	1	1	1	1	1	1	1	1	1	1	1	1	1	1	1	1	1	1	1	1	1	1	1	1	1	1	1	1	1	1	1	1	1	1	1	1	1	1	1	1	1	1	1	1	1	1	1
cholesterol-ester-6,9,12,15,18,21-tetra	1	1	1	1	1	1	1	1	1	1	1	1	1	1	1	1	1	1	1	1	1	1	1	1	1	1	1	1	1	1	1	1	1	1	1	1	1	1	1	1	1	1	1	1	1	1	1	1	1
cholesterol-ester-6,9,12,15,18-tetraco	1	1	1	1	1	1	1	1	1	1	1	1	1	1	1	1	1	1	1	1	1	1	1	1	1	1	1	1	1	1	1	1	1	1	1	1	1	1	1	1	1	1	1	1	1	1	1	1	1
cholesterol-ester-6,9,12,15-octa	1	1	1	1	1	1	1	1	1	1	1	1	1	1	1	1	1	1	1	1	1	1	1	1	1	1	1	1	1	1	1	1	1	1	1	1	1	1	1	1	1	1	1	1	1	1	1	1	1
cholesterol-ester-6,9-octa	1	1	1	1	1	1	1	1	1	1	1	1	1	1	1	1	1	1	1	1	1	1	1	1	1	1	1	1	1	1	1	1	1	1	1	1	1	1	1	1	1	1	1	1	1	1	1	1	1
cholesterol-ester-7,10,13,16,19-docosa	1	1	1	1	1	1	1	1	1	1	1	1	1	1	1	1	1	1	1	1	1	1	1	1	1	1	1	1	1	1	1	1	1	1	1	1	1	1	1	1	1	1	1	1	1	1	1	1	1
cholesterol-ester-7,10,13,16-docosa	1	1	1	1	1	1	1	1	1	1	1	1	1	1	1	1	1	1	1	1	1	1	1	1	1	1	1	1	1	1	1	1	1	1	1	1	1	1	1	1	1	1	1	1	1	1	1	1	1
cholesterol-ester-7-hexa	1	1	1	1	1	1	1	1	1	1	1	1	1	1	1	1	1	1	1	1	1	1	1	1	1	1	1	1	1	1	1	1	1	1	1	1	1	1	1	1	1	1	1	1	1	1	1	1	1
cholesterol-ester-7-octade	1	1	1	1	1	1	1	1	1	1	1	1	1	1	1	1	1	1	1	1	1	1	1	1	1	1	1	1	1	1	1	1	1	1	1	1	1	1	1	1	1	1	1	1	1	1	1	1	1
cholesterol-ester-7-tetrade	1	1	1	1	1	1	1	1	1	1	1	1	1	1	1	1	1	1	1	1	1	1	1	1	1	1	1	1	1	1	1	1	1	1	1	1	1	1	1	1	1	1	1	1	1	1	1	1	1
cholesterol-ester-8,11,14,17-eico	1	1	1	1	1	1	1	1	1	1	1	1	1	1	1	1	1	1	1	1	1	1	1	1	1	1	1	1	1	1	1	1	1	1	1	1	1	1	1	1	1	1	1	1	1	1	1	1	1
cholesterol-ester-8,11-eico	1	1	1	1	1	1	1	1	1	1	1	1	1	1	1	1	1	1	1	1	1	1	1	1	1	1	1	1	1	1	1	1	1	1	1	1	1	1	1	1	1	1	1	1	1	1	1	1	1
cholesterol-ester-9,12,15,18,21-tetra	1	1	1	1	1	1	1	1	1	1	1	1	1	1	1	1	1	1	1	1	1	1	1	1	1	1	1	1	1	1	1	1	1	1	1	1	1	1	1	1	1	1	1	1	1	1	1	1	1
cholesterol-ester-9,12,15,18-tetraco	1	1	1	1	1	1	1	1	1	1	1	1	1	1	1	1	1	1	1	1	1	1	1	1	1	1	1	1	1	1	1	1	1	1	1	1	1	1	1	1	1	1	1	1	1	1	1	1	1
cholesterol-ester-9-eicose	1	1	1	1	1	1	1	1	1	1	1	1	1	1	1	1	1	1	1	1	1	1	1	1	1	1	1	1	1	1	1	1	1	1	1	1	1	1	1	1	1	1	1	1	1	1	1	1	1
cholesterol-ester-9-heptade	1	1	1	1	1	1	1	1	1	1	1	1	1	1	1	1	1	1	1	1	1	1	1	1	1	1	1	1	1	1	1	1	1	1	1	1	1	1	1	1	1	1	1	1	1	1	1	1	1
cholesterol-ester-9-octa	1	1	1	1	1	1	1	1	1	1	1	1	1	1	1	1	1	1	1	1	1	1	1	1	1	1	1	1	1	1	1	1	1	1	1	1	1	1	1	1	1	1	1	1	1	1	1	1	1
cholesterol-ester-9-tetrade	1	1	1	1	1	1	1	1	1	1	1	1	1	1	1	1	1	1	1	1	1	1	1	1	1	1	1	1	1	1	1	1	1	1	1	1	1	1	1	1	1	1	1	1	1	1	1	1	1
cholesterol-ester-arach	1	1	1	1	1	1	1	1	1	1	1	1	1	1	1	1	1	1	1	1	1	1	1	1	1	1	1	1	1	1	1	1	1	1	1	1	1	1	1	1	1	1	1	1	1	1	1	1	1
cholesterol-ester-cis-vac	1	1	1	1	1	1	1	1	1	1	1	1	1	1	1	1	1	1	1	1	1	1	1	1	1	1	1	1	1	1	1	1	1	1	1	1	1	1	1	1	1	1	1	1	1	1	1	1	1
cholesterol-ester-dihomo-gamma	1	1	1	1	1	1	1	1	1	1	1	1	1	1	1	1	1	1	1	1	1	1	1	1	1	1	1	1	1	1	1	1	1	1	1	1	1	1	1	1	1	1	1	1	1	1	1	1	1
cholesterol-ester-docosa	1	1	1	1	1	1	1	1	1	1	1	1	1	1	1	1	1	1	1	1	1	1	1	1	1	1	1	1	1	1	1	1	1	1	1	1	1	1	1	1	1	1	1	1	1	1	1	1	1
cholesterol-ester-eico	1	1	1	1	1	1	1	1	1	1	1	1	1	1	1	1	1	1	1	1	1	1	1	1	1	1	1	1	1	1	1	1	1	1	1	1	1	1	1	1	1	1	1	1	1	1	1	1	1
cholesterol-ester-gamma-lin	1	1	1	1	1	1	1	1	1	1	1	1	1	1	1	1	1	1	1	1	1	1	1	1	1	1	1	1	1	1	1	1	1	1	1	1	1	1	1	1	1	1	1	1	1	1	1	1	1
cholesterol-ester-heneico	1	1	1	1	1	1	1	1	1	1	1	1	1	1	1	1	1	1	1	1	1	1	1	1	1	1	1	1	1	1	1	1	1	1	1	1	1	1	1	1	1	1	1	1	1	1	1	1	1
cholesterol-ester-hepta	1	1	1	1	1	1	1	1	1	1	1	1	1	1	1	1	1	1	1	1	1	1	1	1	1	1	1	1	1	1	1	1	1	1	1	1	1	1	1	1	1	1	1	1	1	1	1	1	1
cholesterol-ester-hexacosa	1	1	1	1	1	1	1	1	1	1	1	1	1	1	1	1	1	1	1	1	1	1	1	1	1	1	1	1	1	1	1	1	1	1	1	1	1	1	1	1	1	1	1	1	1	1	1	1	1
cholesterol-ester-hexecose	1	1	1	1	1	1	1	1	1	1	1	1	1	1	1	1	1	1	1	1	1	1	1	1	1	1	1	1	1	1	1	1	1	1	1	1	1	1	1	1	1	1	1	1	1	1	1	1	1
cholesterol-ester-laur	1	1	1	1	1	1	1	1	1	1	1	1	1	1	1	1	1	1	1	1	1	1	1	1	1	1	1	1	1	1	1	1	1	1	1	1	1	1	1	1	1	1	1	1	1	1	1	1	1
cholesterol-ester-lin	1	1	1	1	1	1	1	1	1	1	1	1	1	1	1	1	1	1	1	1	1	1	1	1	1	1	1	1	1	1	1	1	1	1	1	1	1	1	1	1	1	1	1	1	1	1	1	1	1
cholesterol-ester-linolen	1	1	1	1	1	1	1	1	1	1	1	1	1	1	1	1	1	1	1	1	1	1	1	1	1	1	1	1	1	1	1	1	1	1	1	1	1	1	1	1	1	1	1	1	1	1	1	1	1
cholesterol-ester-myrist	1	1	1	1	1	1	1	1	1	1	1	1	1	1	1	1	1	1	1	1	1	1	1	1	1	1	1	1	1	1	1	1	1	1	1	1	1	1	1	1	1	1	1	1	1	1	1	1	1
cholesterol-ester-nanode	1	1	1	1	1	1	1	1	1	1	1	1	1	1	1	1	1	1	1	1	1	1	1	1	1	1	1	1	1	1	1	1	1	1	1	1	1	1	1	1	1	1	1	1	1	1	1	1	1
cholesterol-ester-ol	1	1	1	1	1	1	1	1	1	1	1	1	1	1	1	1	1	1	1	1	1	1	1	1	1	1	1	1	1	1	1	1	1	1	1	1	1	1	1	1	1	1	1	1	1	1	1	1	1
cholesterol-ester-palm	1	1	1	1	1	1	1	1	1	1	1	1	1	1	1	1	1	1	1	1	1	1	1	1	1	1	1	1	1	1	1	1	1	1	1	1	1	1	1	1	1	1	1	1	1	1	1	1	1
cholesterol-ester-palmn	1	1	1	1	1	1	1	1	1	1	1	1	1	1	1	1	1	1	1	1	1	1	1	1	1	1	1	1	1	1	1	1	1	1	1	1	1	1	1	1	1	1	1	1	1	1	1	1	1
cholesterol-ester-penta	1	1	1	1	1	1	1	1	1	1	1	1	1	1	1	1	1	1	1	1	1	1	1	1	1	1	1	1	1	1	1	1	1	1	1	1	1	1	1	1	1	1	1	1	1	1	1	1	1
cholesterol-ester-stea	1	1	1	1	1	1	1	1	1	1	1	1	1	1	1	1	1	1	1	1	1	1	1	1	1	1	1	1	1	1	1	1	1	1	1	1	1	1	1	1	1	1	1	1	1	1	1	1	1
cholesterol-ester-tetraco	1	1	1	1	1	1	1	1	1	1	1	1	1	1	1	1	1	1	1	1	1	1	1	1	1	1	1	1	1	1	1	1	1	1	1	1	1	1	1	1	1	1	1	1	1	1	1	1	1
cholesterol-ester-trico	1	1	1	1	1	1	1	1	1	1	1	1	1	1	1	1	1	1	1	1	1	1	1	1	1	1	1	1	1	1	1	1	1	1	1	1	1	1	1	1	1	1	1	1	1	1	1	1	1
cholesterol-ester-tridec	1	1	1	1	1	1	1	1	1	1	1	1	1	1	1	1	1	1	1	1	1	1	1	1	1	1	1	1	1	1	1	1	1	1	1	1	1	1	1	1	1	1	1	1	1	1	1	1	1
cholesterol-sulfate	0	0	0	0	0	0	0	0	0	1	0	0	1	0	1	0	0	0	0	1	1	0	1	0	0	0	0	0	0	0	0	0	0	0	0	0	0	0	0	0	0	0	0	1	0	0	0	0	0
choline	1	1	1	1	1	1	1	1	1	1	1	1	1	1	1	1	1	1	1	1	1	1	1	1	1	1	1	1	1	1	1	1	1	1	1	1	1	1	1	1	1	1	1	1	1	1	1	1	1
choloyl-CoA	0	0	0	0	0	0	0	0	0	0	0	0	0	0	0	0	0	0	0	0	0	0	0	1	0	0	0	0	0	0	0	0	0	0	0	0	0	0	0	0	0	0	0	1	0	0	0	0	0
cis,cis-3,6-dodecadienoyl-CoA	1	0	0	1	0	1	1	1	1	1	1	1	0	1	1	1	1	0	1	1	1	0	0	0	0	1	1	1	1	1	1	0	1	1	1	1	0	0	0	1	0	0	1	1	1	1	1	0	0
cis,cis-myristo-5,8-dienoyl-CoA	1	0	0	1	0	1	1	1	1	1	1	1	0	1	1	1	1	0	1	1	1	0	0	0	0	1	1	1	1	1	1	0	1	1	1	1	0	0	0	1	0	0	1	1	1	1	1	0	0
cis-(3S)-hydroxytetradec-5-enoyl-CoA	1	1	1	1	1	1	1	1	1	1	1	1	1	1	1	1	1	1	1	1	1	1	1	1	1	1	1	1	1	1	1	1	1	1	1	1	1	1	1	1	1	1	1	1	1	1	1	1	1
cis-(3S)-hydroxytetradec-7-enoyl-CoA	1	1	1	1	1	1	1	1	1	1	1	1	1	1	1	1	1	1	1	1	1	1	1	1	1	1	1	1	1	1	1	1	1	1	1	1	1	1	1	1	1	1	1	1	1	1	1	1	1
cis-cetoleic acid	1	1	1	1	1	1	1	1	1	1	1	1	1	1	1	1	1	1	1	1	1	1	1	1	1	1	1	1	1	1	1	1	1	1	1	1	1	1	1	1	1	1	1	1	1	1	1	1	1
cis-erucic acid	1	1	1	1	1	1	1	1	1	1	1	1	1	1	1	1	1	1	1	1	1	1	1	1	1	1	1	1	1	1	1	1	1	1	1	1	1	1	1	1	1	1	1	1	1	1	1	1	1
cis-gondoic acid	1	1	1	1	1	1	1	1	1	1	1	1	1	1	1	1	1	1	1	1	1	1	1	1	1	1	1	1	1	1	1	1	1	1	1	1	1	1	1	1	1	1	1	1	1	1	1	1	1
cis-vaccenic acid	1	1	1	1	1	1	1	1	1	1	1	1	1	1	1	1	1	1	1	1	1	1	1	1	1	1	1	1	1	1	1	1	1	1	1	1	1	1	1	1	1	1	1	1	1	1	1	1	1
cis-vaccenoyl-CoA	1	1	1	1	1	1	1	1	1	1	1	1	1	1	1	1	1	1	1	1	1	1	1	1	1	1	1	1	1	1	1	1	1	1	1	1	1	1	1	1	1	1	1	1	1	1	1	1	1
citrate	1	1	1	1	1	1	1	1	1	1	1	1	1	1	1	1	1	1	1	1	1	1	1	1	1	1	1	1	1	1	1	1	1	1	1	1	1	1	1	1	1	1	1	1	1	1	1	1	1
crotonyl-CoA	1	1	1	1	1	1	1	1	1	1	1	1	1	1	1	1	1	1	1	1	1	1	1	1	1	1	1	1	1	1	1	1	1	1	1	1	1	1	1	1	1	1	1	1	1	1	1	1	1
cysteine	1	1	1	1	1	1	1	1	1	1	1	1	1	1	1	1	1	1	1	1	1	1	1	1	1	1	1	1	1	1	1	1	1	1	1	1	1	1	1	1	1	1	1	1	1	1	1	1	1
dADP	0	0	0	0	0	0	0	1	0	1	0	0	0	1	1	0	1	0	0	0	0	0	0	1	0	0	0	0	0	0	1	0	0	0	0	0	1	1	0	0	0	1	0	1	1	0	0	0	1
dAMP	0	0	0	0	0	0	0	1	0	0	0	0	0	0	1	0	1	0	0	0	0	0	0	1	0	0	0	0	0	0	1	0	0	0	0	0	1	0	0	0	0	1	0	1	0	0	0	0	1
dATP	1	1	1	1	1	1	1	1	1	1	1	1	1	1	1	1	1	1	1	1	1	1	1	1	1	1	1	1	1	1	1	1	1	1	1	1	1	1	1	1	1	1	1	1	1	1	1	1	1
dCDP	0	0	0	0	0	0	0	1	0	0	0	0	0	1	0	0	0	0	0	0	0	0	0	1	0	0	0	0	0	0	0	0	0	0	0	0	1	0	1	0	0	0	0	1	1	0	0	0	0
dCMP	0	0	0	0	0	0	0	0	0	0	0	0	0	0	0	0	0	0	0	0	0	0	0	1	0	0	0	0	0	0	0	0	0	0	0	0	0	0	0	0	0	0	0	1	0	0	0	0	0
dCTP	1	1	1	1	1	1	1	1	1	1	1	1	1	1	1	1	1	1	1	1	1	1	1	1	1	1	1	1	1	1	1	1	1	1	1	1	1	1	1	1	1	1	1	1	1	1	1	1	1
dGDP	0	0	0	0	0	0	0	0	0	1	0	0	0	0	1	0	0	0	0	0	0	0	0	1	0	0	0	1	0	0	0	0	0	0	0	0	0	0	0	0	0	1	0	1	0	0	0	0	0
dGMP	0	0	0	0	0	0	0	0	0	0	0	0	0	0	1	0	0	0	0	0	0	0	0	1	0	0	0	0	0	0	0	0	0	0	0	0	0	0	0	0	0	1	0	1	0	0	0	0	0
dGTP	1	1	1	1	1	1	1	1	1	1	1	1	1	1	1	1	1	1	1	1	1	1	1	1	1	1	1	1	1	1	1	1	1	1	1	1	1	1	1	1	1	1	1	1	1	1	1	1	1
dTDP	1	1	1	1	1	1	1	1	1	1	1	1	1	1	1	1	1	1	1	1	1	1	1	1	1	1	1	1	1	1	1	1	1	1	1	1	1	1	1	1	1	1	1	1	1	1	1	1	1
dTMP	1	1	1	1	1	1	1	1	1	1	1	1	1	1	1	1	1	1	1	1	1	1	1	1	1	1	1	1	1	1	1	1	1	1	1	1	1	1	1	1	1	1	1	1	1	1	1	1	1
dTTP	1	1	1	1	1	1	1	1	1	1	1	1	1	1	1	1	1	1	1	1	1	1	1	1	1	1	1	1	1	1	1	1	1	1	1	1	1	1	1	1	1	1	1	1	1	1	1	1	1
dUDP	0	0	0	0	0	0	0	1	0	1	0	0	0	1	0	0	0	0	0	0	0	0	0	1	0	0	0	1	0	0	0	0	0	0	0	1	1	0	1	0	1	1	0	1	1	0	0	0	1
dUMP	1	1	1	1	1	1	1	1	1	1	1	1	1	1	1	1	1	1	1	1	1	1	1	1	1	1	1	1	1	1	1	1	1	1	1	1	1	1	1	1	1	1	1	1	1	1	1	1	1
dUTP	0	0	0	0	0	0	0	0	0	0	0	0	0	0	0	0	0	0	0	0	0	0	0	1	0	0	0	0	0	0	0	0	0	0	0	0	0	0	0	0	0	0	0	1	0	0	0	0	0
decanoyl-CoA	1	1	1	1	1	1	1	1	1	1	1	1	1	1	1	1	1	1	1	1	1	1	1	1	1	1	1	1	1	1	1	1	1	1	1	1	1	1	1	1	1	1	1	1	1	1	1	1	1
dehydroalanine	0	0	0	0	0	0	0	0	0	0	0	0	0	0	0	0	0	0	0	0	0	0	0	0	0	0	0	0	0	0	0	0	0	0	0	0	0	0	0	0	0	0	0	1	0	0	0	0	0
dehydroepiandrosterone sulfate	0	0	0	0	0	0	0	0	0	0	0	0	0	0	0	0	0	0	0	0	0	0	0	0	0	0	0	0	0	0	0	0	0	0	0	0	0	0	0	0	0	0	0	1	0	0	0	0	0
delta2-THA-CoA	1	1	0	0	1	0	0	1	0	1	1	1	1	0	0	0	0	1	0	1	0	0	1	1	0	1	1	1	0	1	0	1	1	1	0	1	1	0	0	1	1	1	1	0	1	0	0	0	0
deoxyadenosine	0	0	0	0	0	0	0	1	0	0	0	0	0	0	1	0	1	0	0	0	0	0	0	1	0	0	0	0	0	0	1	0	0	0	0	0	1	0	0	0	0	1	0	1	0	0	0	0	1
deoxyguanosine	0	0	0	0	0	0	0	0	0	0	0	0	0	0	1	0	0	0	0	0	0	0	0	1	0	0	0	0	0	0	0	0	0	0	0	0	0	0	0	0	0	1	0	1	0	0	0	0	0
deoxyinosine	0	0	0	0	0	0	0	0	0	0	0	0	0	0	0	0	0	0	0	0	0	0	0	1	0	0	0	0	0	0	0	0	0	0	0	0	0	0	0	0	0	0	0	1	0	0	0	0	0
deoxyuridine	0	0	0	0	0	0	0	0	0	0	0	0	0	0	0	0	0	0	0	0	0	0	0	1	0	0	0	0	0	0	0	0	0	0	0	0	0	0	0	0	0	0	0	1	0	0	0	0	0
digalactosylceramide	0	0	1	0	0	0	0	0	0	0	0	0	0	0	0	0	0	0	0	0	0	0	0	0	0	0	0	0	0	0	0	0	0	0	0	0	0	0	0	0	0	0	0	0	0	0	0	0	0
dihomo-gamma-linolenate	1	1	1	1	1	1	1	1	1	1	1	1	1	1	1	1	1	1	1	1	1	1	1	1	1	1	1	1	1	1	1	1	1	1	1	1	1	1	1	1	1	1	1	1	1	1	1	1	1
dihomo-gamma-linolenoyl-CoA	1	1	1	1	1	1	1	1	1	1	1	1	1	1	1	1	1	1	1	1	1	1	1	1	1	1	1	1	1	1	1	1	1	1	1	1	1	1	1	1	1	1	1	1	1	1	1	1	1
dihydroceramide pool	1	1	1	1	1	1	1	1	1	1	1	1	1	1	1	1	1	1	1	1	1	1	1	1	1	1	1	1	1	1	1	1	1	1	1	1	1	1	1	1	1	1	1	1	1	1	1	1	1
dihydrofolate	1	1	1	1	1	1	1	1	1	1	1	1	1	1	1	1	1	1	1	1	1	1	1	1	1	1	1	1	1	1	1	1	1	1	1	1	1	1	1	1	1	1	1	1	1	1	1	1	1
dihydrolipoamide	0	0	0	0	0	0	0	0	0	0	0	0	0	0	0	0	0	0	0	0	0	0	0	1	0	0	0	1	0	0	0	0	0	0	0	0	0	0	0	0	0	0	0	1	0	0	0	0	0
dimethylallyl-PP	1	1	1	1	1	1	1	1	1	1	1	1	1	1	1	1	1	1	1	1	1	1	1	1	1	1	1	1	1	1	1	1	1	1	1	1	1	1	1	1	1	1	1	1	1	1	1	1	1
docosahexaenoylcarnitine	1	1	1	1	1	1	1	1	1	1	1	1	1	1	1	1	1	1	1	1	1	1	1	1	1	1	1	1	1	1	1	1	1	1	1	1	1	1	1	1	1	1	1	1	1	1	1	1	1
docosanoyl-CoA	1	1	1	1	1	1	1	1	1	1	1	1	1	1	1	1	1	1	1	1	1	1	1	1	1	1	1	1	1	1	1	1	1	1	1	1	1	1	1	1	1	1	1	1	1	1	1	1	1
docosanoylcarnitine	1	1	1	1	1	1	1	1	1	1	1	1	1	1	1	1	1	1	1	1	0	1	1	1	1	1	1	1	1	1	1	1	1	1	1	1	1	1	1	1	1	1	1	1	1	1	1	1	1
docosenoylcarnitine	1	1	1	1	1	1	1	1	1	1	1	1	1	1	1	1	1	1	1	1	0	1	1	1	1	1	1	1	1	1	1	1	1	1	1	1	1	1	1	1	1	1	1	1	1	1	1	1	1
docosenoylcarnitine(11)	1	1	1	1	1	1	1	1	1	1	1	1	1	1	1	1	1	1	1	1	0	1	1	1	1	1	1	1	1	1	1	1	1	1	1	1	1	1	1	1	1	1	1	1	1	1	1	1	1
dodecanoylcarnitine	1	1	1	1	1	1	1	1	1	1	1	1	1	1	1	1	1	1	1	1	1	1	1	1	1	1	1	1	1	1	1	1	1	1	1	1	1	1	1	1	1	1	1	1	1	1	1	1	1
eicosa-(2E,8Z,11Z,14Z,17Z)-pentaenoyl-CoA	1	1	1	1	1	1	1	1	1	1	1	1	1	1	1	1	1	1	1	1	1	1	1	1	1	1	1	1	1	1	1	1	1	1	1	1	1	1	1	1	1	1	1	1	1	1	1	1	1
eicosadienoylcarnitine	1	1	1	1	1	1	1	1	1	1	1	1	1	1	1	1	1	1	1	1	0	1	1	1	1	1	1	1	1	1	1	1	1	1	1	1	1	1	1	1	1	1	1	1	1	1	1	1	1
eicosanoate	1	1	1	1	1	1	1	1	1	1	1	1	1	1	1	1	1	1	1	1	1	1	1	1	1	1	1	1	1	1	1	1	1	1	1	1	1	1	1	1	1	1	1	1	1	1	1	1	1
eicosanoyl-CoA	1	1	1	1	1	1	1	1	1	1	1	1	1	1	1	1	1	1	1	1	1	1	1	1	1	1	1	1	1	1	1	1	1	1	1	1	1	1	1	1	1	1	1	1	1	1	1	1	1
eicosanoylcarnitine	1	1	1	1	1	1	1	1	1	1	1	1	1	1	1	1	1	1	1	1	0	1	1	1	1	1	1	1	1	1	1	1	1	1	1	1	1	1	1	1	1	1	1	1	1	1	1	1	1
eicosatrienoylcarnitine	1	1	1	1	1	1	1	1	1	1	1	1	1	1	1	1	1	1	1	1	1	1	1	1	1	1	1	1	1	1	1	1	1	1	1	1	1	1	1	1	1	1	1	1	1	1	1	1	1
eicosenoylcarnitine(11)	1	1	1	1	1	1	1	1	1	1	1	1	1	1	1	1	1	1	1	1	0	1	1	1	1	1	1	1	1	1	1	1	1	1	1	1	1	1	1	1	1	1	1	1	1	1	1	1	1
eicosenoylcarnitine(7)	1	1	1	1	1	1	1	1	1	1	1	1	1	1	1	1	1	1	1	1	0	1	1	1	1	1	1	1	1	1	1	1	1	1	1	1	1	1	1	1	1	1	1	1	1	1	1	1	1
eicosenoylcarnitine(9)	1	1	1	1	1	1	1	1	1	1	1	1	1	1	1	1	1	1	1	1	0	1	1	1	1	1	1	1	1	1	1	1	1	1	1	1	1	1	1	1	1	1	1	1	1	1	1	1	1
elaidate	1	1	1	1	1	1	1	1	1	1	1	1	1	1	1	1	1	1	1	1	1	1	1	1	1	1	1	1	1	1	1	1	1	1	1	1	1	1	1	1	1	1	1	1	1	1	1	1	1
erythrose-4-phosphate	0	0	0	0	0	0	0	1	0	0	0	0	0	0	0	0	0	0	0	0	0	0	0	1	0	0	0	1	0	0	0	0	0	0	0	0	0	0	0	0	0	0	0	1	0	0	0	0	0
ethanolamine	1	1	1	1	1	1	1	1	1	1	1	1	1	1	1	1	1	1	1	1	1	1	1	1	1	1	1	1	1	1	1	1	1	1	1	1	1	1	1	1	1	1	1	1	1	1	1	1	1
ethanolamine-phosphate	1	1	1	1	1	1	1	1	1	1	1	1	1	1	1	1	1	1	1	1	1	1	1	1	1	1	1	1	1	1	1	1	1	1	1	1	1	1	1	1	1	1	1	1	1	1	1	1	1
farnesyl-PP	1	1	1	1	1	1	1	1	1	1	1	1	1	1	1	1	1	1	1	1	1	1	1	1	1	1	1	1	1	1	1	1	1	1	1	1	1	1	1	1	1	1	1	1	1	1	1	1	1
fatty acid-LD-PC pool	1	1	1	1	1	1	1	1	1	1	1	1	1	1	1	1	1	1	1	1	1	1	1	1	1	1	1	1	1	1	1	1	1	1	1	1	1	1	1	1	1	1	1	1	1	1	1	1	1
fatty acid-LD-PE pool	1	1	1	1	1	1	1	1	1	1	1	1	1	1	1	1	1	1	1	1	1	1	1	1	1	1	1	1	1	1	1	1	1	1	1	1	1	1	1	1	1	1	1	1	1	1	1	1	1
fatty acid-LD-PI pool	0	0	0	0	0	0	0	0	1	0	0	0	0	0	0	0	0	0	0	0	0	0	0	0	1	0	0	0	0	0	0	0	1	0	0	0	0	0	0	0	0	0	0	1	0	0	0	0	0
fatty acid-LD-PS pool	0	0	0	1	0	0	0	1	0	1	0	0	0	0	0	0	0	1	0	0	0	0	0	0	0	0	0	0	0	1	0	0	0	1	0	1	0	0	0	0	0	0	0	0	1	0	0	0	0
fatty acid-LD-SM pool	1	1	1	1	0	1	1	1	1	1	1	1	0	1	1	1	1	1	1	1	1	1	1	1	1	0	1	1	1	1	1	1	1	1	0	0	1	1	1	1	1	1	0	1	1	1	1	1	1
fatty acid-LD-TG1 pool	0	1	1	1	0	1	1	0	1	0	0	0	0	1	1	1	1	0	1	0	1	1	0	1	1	0	0	0	1	0	1	0	0	0	1	0	0	1	1	0	0	0	0	1	0	1	1	1	1
fatty acid-LD-TG2 pool	0	1	0	0	0	0	1	0	1	0	0	1	0	1	1	1	1	0	1	0	1	1	0	0	1	0	0	0	0	1	1	0	0	0	1	0	0	1	1	0	1	0	0	1	0	0	1	1	1
ferricytochrome C	1	1	1	1	1	1	1	1	1	1	1	1	1	1	1	1	1	1	1	1	1	1	1	1	1	1	1	1	1	1	1	1	1	1	1	1	1	1	1	1	1	1	1	1	1	1	1	1	1
ferrocytochrome C	1	1	1	1	1	1	1	1	1	1	1	1	1	1	1	1	1	1	1	1	1	1	1	1	1	1	1	1	1	1	1	1	1	1	1	1	1	1	1	1	1	1	1	1	1	1	1	1	1
formate	1	1	1	1	1	1	1	1	1	1	1	1	1	1	1	1	1	1	1	1	1	1	1	1	1	1	1	1	1	1	1	1	1	1	1	1	1	1	1	1	1	1	1	1	1	1	1	1	1
fructose-1,6-bisphosphate	0	0	0	0	0	0	0	0	0	0	0	0	0	0	0	0	0	0	0	0	0	0	0	1	0	0	0	1	0	0	0	0	0	0	0	0	0	0	0	0	0	0	0	1	0	0	0	0	0
fructose-6-phosphate	1	1	1	1	1	1	1	1	1	1	1	1	1	1	1	1	1	1	1	1	1	1	1	1	1	1	1	1	1	1	1	1	1	1	1	1	1	1	1	1	1	1	1	1	1	1	1	1	1
fumarate	1	1	1	1	1	1	1	1	1	1	1	1	1	1	1	1	1	1	1	1	1	1	1	1	1	1	1	1	1	1	1	1	1	1	1	1	1	1	1	1	1	1	1	1	1	1	1	1	1
galactose	0	0	1	0	0	0	0	0	0	0	0	0	0	0	0	0	0	0	0	0	0	0	0	1	0	0	0	0	0	0	0	0	0	0	0	0	0	0	0	0	0	0	0	1	0	0	0	0	0
gamma-linolenate	1	1	1	1	1	1	1	1	1	1	1	1	1	1	1	1	1	1	1	1	1	1	1	1	1	1	1	1	1	1	1	1	1	1	1	1	1	1	1	1	1	1	1	1	1	1	1	1	1
gamma-linolenoyl-CoA	1	1	1	1	1	1	1	1	1	1	1	1	1	1	1	1	1	1	1	1	1	1	1	1	1	1	1	1	1	1	1	1	1	1	1	1	1	1	1	1	1	1	1	1	1	1	1	1	1
gamma-linolenoylcarnitine	1	1	1	1	1	1	1	1	1	1	1	1	1	1	1	1	1	1	1	1	1	1	1	1	1	1	1	1	1	1	1	1	1	1	1	1	1	1	1	1	1	1	1	1	1	1	1	1	1
geranyl-PP	1	1	1	1	1	1	1	1	1	1	1	1	1	1	1	1	1	1	1	1	1	1	1	1	1	1	1	1	1	1	1	1	1	1	1	1	1	1	1	1	1	1	1	1	1	1	1	1	1
glucono-1,5-lactone-6-phosphate	0	0	0	0	0	0	0	1	0	0	0	0	0	0	0	0	0	0	0	0	0	0	0	1	0	0	0	0	0	0	0	0	0	0	0	0	0	0	0	0	0	0	0	1	0	0	0	0	0
glucosamine-6-phosphate	0	0	0	0	0	0	0	1	0	0	0	0	0	0	0	0	0	0	0	0	0	0	0	1	0	0	0	0	0	0	0	0	0	0	0	0	0	0	0	0	0	0	0	1	0	0	0	0	0
glucose	1	1	1	1	1	1	1	1	1	1	1	1	1	1	1	1	1	1	1	1	1	1	1	1	1	1	1	1	1	1	1	1	1	1	1	1	1	1	1	1	1	1	1	1	1	1	1	1	1
glucose-1-phosphate	1	1	1	1	1	1	1	1	1	1	1	1	1	1	1	1	1	1	1	1	1	1	1	1	1	1	1	1	1	1	1	1	1	1	1	1	1	1	1	1	1	1	1	1	1	1	1	1	1
glucose-6-phosphate	1	1	1	1	1	1	1	1	1	1	1	1	1	1	1	1	1	1	1	1	1	1	1	1	1	1	1	1	1	1	1	1	1	1	1	1	1	1	1	1	1	1	1	1	1	1	1	1	1
glucosylceramide pool	0	0	0	0	0	0	0	0	0	0	0	0	0	0	0	0	0	0	0	0	0	0	0	1	0	0	0	0	0	0	0	0	0	0	0	0	0	0	0	0	0	0	0	1	0	0	0	0	0
glutamate	1	1	1	1	1	1	1	1	1	1	1	1	1	1	1	1	1	1	1	1	1	1	1	1	1	1	1	1	1	1	1	1	1	1	1	1	1	1	1	1	1	1	1	1	1	1	1	1	1
glutamine	1	1	1	1	1	1	1	1	1	1	1	1	1	1	1	1	1	1	1	1	1	1	1	1	1	1	1	1	1	1	1	1	1	1	1	1	1	1	1	1	1	1	1	1	1	1	1	1	1
glutamyl-5-phosphate	0	0	0	0	0	0	0	0	0	0	0	0	1	1	0	0	0	1	1	0	0	0	0	0	0	0	0	0	0	1	0	0	0	0	1	0	0	0	1	0	0	1	0	1	0	0	0	0	0
glutathionyl-leukotriene C4	0	0	0	0	0	0	0	0	0	0	0	0	0	0	0	0	0	0	0	0	0	0	0	1	0	0	0	0	0	0	0	0	0	0	0	0	0	0	0	0	0	0	0	1	0	0	0	0	0
glyceraldehyde	1	1	1	1	1	1	1	1	1	1	1	1	1	1	1	1	1	1	1	1	1	1	1	1	1	1	1	1	1	1	1	1	1	1	1	1	1	1	1	1	1	1	1	1	1	1	1	1	1
glycerate	0	1	0	1	1	1	1	0	1	0	1	0	1	0	0	0	1	1	0	1	1	1	0	0	1	0	0	0	0	1	0	0	1	1	1	1	0	1	0	1	0	0	1	0	0	1	1	1	0
glycerol	1	1	1	1	1	1	1	1	1	1	1	1	1	1	1	1	1	1	1	1	1	1	1	1	1	1	1	1	1	1	1	1	1	1	1	1	1	1	1	1	1	1	1	1	1	1	1	1	1
glycine	1	1	1	1	1	1	1	1	1	1	1	1	1	1	1	1	1	1	1	1	1	1	1	1	1	1	1	1	1	1	1	1	1	1	1	1	1	1	1	1	1	1	1	1	1	1	1	1	1
glycogen	1	1	1	1	1	1	1	1	1	1	1	1	1	1	1	1	1	1	1	1	1	1	1	1	1	1	1	1	1	1	1	1	1	1	1	1	1	1	1	1	1	1	1	1	1	1	1	1	1
glycolate	0	0	0	0	0	0	0	0	0	1	0	0	0	0	0	0	0	0	0	0	0	0	0	0	0	1	0	0	1	0	0	0	0	0	0	1	0	0	0	0	0	0	0	0	1	0	1	0	0
glycolithocholate	0	0	0	0	0	0	0	0	0	0	0	0	0	0	0	0	0	0	0	0	0	0	0	0	0	0	0	0	0	0	0	0	0	0	0	0	0	0	0	0	0	0	0	0	0	0	0	0	0
glycoursodeoxycholate	0	0	0	0	0	0	0	0	0	0	0	0	0	0	0	0	0	0	0	0	0	0	0	0	0	0	0	0	0	0	0	0	0	0	0	0	0	0	0	0	0	0	0	1	0	0	0	0	0
glyoxalate	0	0	0	0	0	0	0	0	0	1	0	0	1	1	0	0	0	1	1	0	0	0	0	0	0	1	0	0	1	1	0	0	0	0	1	1	0	0	1	0	0	1	0	0	1	0	1	0	0
guanine	0	0	0	0	0	0	0	0	0	0	0	0	0	0	1	0	0	0	0	0	0	0	0	1	0	0	0	0	0	0	0	0	0	0	0	0	0	0	0	0	0	1	0	1	0	0	0	0	0
heneicosanoyl-CoA	1	1	1	1	1	1	1	1	1	1	1	1	1	1	1	1	1	1	1	1	1	1	1	1	1	1	1	1	1	1	1	1	1	1	1	1	1	1	1	1	1	1	1	1	1	1	1	1	1
heneicosanoylcarnitine	1	1	1	1	1	1	1	1	1	1	1	1	1	1	1	1	1	1	1	1	0	1	1	1	1	1	1	1	1	1	1	1	1	1	1	1	1	1	1	1	1	1	1	1	1	1	1	1	1
henicosanoic acid	1	1	1	1	1	1	1	1	1	1	1	1	1	1	1	1	1	1	1	1	1	1	1	1	1	1	1	1	1	1	1	1	1	1	1	1	1	1	1	1	1	1	1	1	1	1	1	1	1
heptadecanoyl-CoA	1	1	1	1	1	1	1	1	1	1	1	1	1	1	1	1	1	1	1	1	1	1	1	1	1	1	1	1	1	1	1	1	1	1	1	1	1	1	1	1	1	1	1	1	1	1	1	1	1
heptadecanoyl-[ACP]	0	0	0	0	0	0	0	0	0	0	0	0	0	0	0	0	0	0	0	0	0	0	0	1	0	0	0	0	0	0	0	0	0	0	0	0	0	0	0	0	0	0	0	1	0	0	0	0	0
heptadecanoylcarnitine	1	1	1	1	1	1	1	1	1	1	1	1	1	1	1	1	1	1	1	1	0	1	1	1	1	1	1	1	1	1	1	1	1	1	1	1	1	1	1	1	1	1	1	1	1	1	1	1	1
heptadecenoylcarnitine(7)	1	1	1	1	1	1	1	1	1	1	1	1	1	1	1	1	1	1	1	1	1	1	1	1	1	1	1	1	1	1	1	1	1	1	1	1	1	1	1	1	1	1	1	1	1	1	1	1	1
heptadecenoylcarnitine(8)	1	1	1	1	1	1	1	1	1	1	1	1	1	1	1	1	1	1	1	1	0	1	1	1	1	1	1	1	1	1	1	1	1	1	1	1	1	1	1	1	1	1	1	1	1	1	1	1	1
heptanoyl-CoA	1	1	1	1	1	1	1	1	1	1	1	1	1	1	1	1	1	1	1	1	1	1	1	0	1	1	1	1	1	1	1	1	1	1	1	1	1	1	1	1	1	1	1	1	1	1	1	1	1
heptanoyl-[ACP]	0	0	0	0	0	0	0	0	0	0	0	0	0	0	0	0	0	0	0	0	0	0	0	1	0	0	0	0	0	0	0	0	0	0	0	0	0	0	0	0	0	0	0	1	0	0	0	0	0
hexacosanoyl-CoA	1	1	1	1	1	1	1	1	1	1	1	1	1	1	1	1	1	1	1	1	1	1	1	1	1	1	1	1	1	1	1	1	1	1	1	1	1	1	1	1	1	1	1	1	1	1	1	1	1
hexacosanoylcarnitine	1	1	1	1	1	1	1	1	1	1	1	1	1	1	1	1	1	1	1	1	0	1	1	1	1	1	1	1	1	1	1	1	1	1	1	1	1	1	1	1	1	1	1	1	1	1	1	1	1
hexacosenoyl-CoA	1	1	1	1	1	1	1	1	1	1	1	1	1	1	1	1	1	1	1	1	1	1	1	1	1	1	1	1	1	1	1	1	1	1	1	1	1	1	1	1	1	1	1	1	1	1	1	1	1
hexacosenoylcarnitine	1	1	1	1	1	1	1	1	1	1	1	1	1	1	1	1	1	1	1	1	0	1	1	1	1	1	1	1	1	1	1	1	1	1	1	1	1	1	1	1	1	1	1	1	1	1	1	1	1
hexadecanal	1	0	1	1	0	1	1	0	0	0	1	1	0	0	0	1	0	0	1	1	1	1	0	1	0	0	1	0	1	0	1	1	0	0	0	0	0	1	0	0	0	0	0	1	0	1	1	1	0
hexadecenal	1	0	1	1	0	1	1	0	0	0	1	1	0	0	0	1	0	0	1	1	1	1	0	1	0	0	1	0	1	0	1	1	0	0	0	0	0	1	0	0	0	0	0	1	0	1	1	1	0
hexadecenoylcarnitine(9)	1	1	1	1	1	1	1	1	1	1	1	1	1	1	1	1	1	1	1	1	1	1	1	1	1	1	1	1	1	1	1	1	1	1	1	1	1	1	1	1	1	1	1	1	1	1	1	1	1
hexanoyl-CoA	1	1	1	1	1	1	1	1	1	1	1	1	1	1	1	1	1	1	1	1	1	1	1	1	1	1	1	1	1	1	1	1	1	1	1	1	1	1	1	1	1	1	1	1	1	1	1	1	1
histamine	0	0	0	0	0	0	0	0	0	0	0	0	0	0	0	0	0	0	0	0	0	0	0	1	0	0	0	0	0	0	0	0	0	0	0	0	0	0	0	0	0	0	0	1	0	0	0	0	0
histidine	1	1	1	1	1	1	1	1	1	1	1	1	1	1	1	1	1	1	1	1	1	1	1	1	1	1	1	1	1	1	1	1	1	1	1	1	1	1	1	1	1	1	1	1	1	1	1	1	1
homocysteine	1	1	1	0	1	0	0	0	1	0	0	0	0	0	0	0	0	0	0	0	0	0	0	1	0	0	0	0	0	0	0	0	0	0	0	0	0	0	0	1	0	0	1	1	0	0	0	0	0
homoserine	0	0	0	0	0	0	0	0	0	0	0	0	0	0	0	0	0	0	0	0	0	0	0	1	0	0	0	0	0	0	0	0	0	0	0	1	0	0	0	0	0	0	0	1	0	0	0	0	0
hydracrylate	0	0	0	0	0	0	0	0	0	0	0	0	0	0	0	0	0	0	0	0	1	1	0	0	0	0	0	0	0	0	0	0	0	0	0	0	0	0	0	1	0	0	0	1	0	0	0	0	0
hypoxanthine	0	0	0	0	0	0	0	0	0	0	0	0	0	0	0	0	0	0	0	0	0	0	0	1	0	0	0	0	0	0	0	0	0	1	0	0	0	0	0	0	0	1	0	1	0	0	0	0	1
inosine	0	0	0	0	0	0	0	0	0	0	0	0	0	0	0	0	0	0	0	0	0	0	0	1	0	0	0	0	0	0	0	0	0	0	0	0	0	0	0	0	0	0	0	1	0	0	0	0	0
inositol	1	1	1	1	1	1	1	1	1	1	1	1	1	1	1	1	1	1	1	1	1	1	1	1	1	1	1	1	1	1	1	1	1	1	1	1	1	1	1	1	1	1	1	1	1	1	1	1	1
inositol-1-phosphate	0	0	0	1	0	0	1	0	1	0	0	0	0	1	1	0	0	0	0	0	0	0	0	0	0	0	0	0	0	1	0	0	1	0	0	0	0	0	1	0	0	0	0	1	0	0	0	0	0
isocitrate	1	1	1	1	1	1	1	1	1	1	1	1	1	1	1	1	1	1	1	1	1	1	1	1	1	1	1	1	1	1	1	1	1	1	1	1	1	1	1	1	1	1	1	1	1	1	1	1	1
isoleucine	1	1	1	1	1	1	1	1	1	1	1	1	1	1	1	1	1	1	1	1	1	1	1	1	1	1	1	1	1	1	1	1	1	1	1	1	1	1	1	1	1	1	1	1	1	1	1	1	1
isopentenyl-pPP	1	1	1	1	1	1	1	1	1	1	1	1	1	1	1	1	1	1	1	1	1	1	1	1	1	1	1	1	1	1	1	1	1	1	1	1	1	1	1	1	1	1	1	1	1	1	1	1	1
lanosterol	1	1	1	1	1	1	1	1	1	1	1	1	1	1	1	1	1	1	1	1	1	1	1	1	1	1	1	1	1	1	1	1	1	1	1	1	1	1	1	1	1	1	1	1	1	1	1	1	1
lathosterol	1	0	0	0	0	0	0	0	0	1	0	0	0	1	0	0	0	0	0	0	0	0	0	1	0	0	0	1	0	0	0	0	0	0	0	0	1	0	1	0	0	1	1	1	0	0	1	0	0
lauric acid	1	1	1	1	1	1	1	1	1	1	1	1	1	1	1	1	1	1	1	1	1	1	1	1	1	1	1	1	1	1	1	1	1	1	1	1	1	1	1	1	1	1	1	1	1	1	1	1	1
lauroyl-CoA	1	1	1	1	1	1	1	1	1	1	1	1	1	1	1	1	1	1	1	1	1	1	1	1	1	1	1	1	1	1	1	1	1	1	1	1	1	1	1	1	1	1	1	1	1	1	1	1	1
leucine	1	1	1	1	1	1	1	1	1	1	1	1	1	1	1	1	1	1	1	1	1	1	1	1	1	1	1	1	1	1	1	1	1	1	1	1	1	1	1	1	1	1	1	1	1	1	1	1	1
leukotriene B4	0	0	0	0	0	0	0	0	0	0	0	0	0	0	0	0	0	0	0	0	0	0	0	1	0	0	0	0	0	0	0	0	0	0	0	0	0	0	0	0	0	0	0	1	0	0	0	0	0
lignocerate	1	1	1	1	1	1	1	1	1	1	1	1	1	1	1	1	1	1	1	1	1	1	1	1	1	1	1	1	1	1	1	1	1	1	1	1	1	1	1	1	1	1	1	1	1	1	1	1	1
linoleate	1	1	1	1	1	1	1	1	1	1	1	1	1	1	1	1	1	1	1	1	1	1	1	1	1	1	1	1	1	1	1	1	1	1	1	1	1	1	1	1	1	1	1	1	1	1	1	1	1
linoleic-carnitine	1	1	1	1	1	1	1	1	1	1	1	1	1	1	1	1	1	1	1	1	1	1	1	1	1	1	1	1	1	1	1	1	1	1	1	1	1	1	1	1	1	1	1	1	1	1	1	1	1
linolenate	1	1	1	1	1	1	1	1	1	1	1	1	1	1	1	1	1	1	1	1	1	1	1	1	1	1	1	1	1	1	1	1	1	1	1	1	1	1	1	1	1	1	1	1	1	1	1	1	1
linolenoyl-CoA	1	1	1	1	1	1	1	1	1	1	1	1	1	1	1	1	1	1	1	1	1	1	1	1	1	1	1	1	1	1	1	1	1	1	1	1	1	1	1	1	1	1	1	1	1	1	1	1	1
linoleoyl-CoA	1	1	1	1	1	1	1	1	1	1	1	1	1	1	1	1	1	1	1	1	1	1	1	1	1	1	1	1	1	1	1	1	1	1	1	1	1	1	1	1	1	1	1	1	1	1	1	1	1
lipoamide	0	0	0	0	0	0	0	0	0	0	0	0	0	0	0	0	0	0	0	0	0	0	0	1	0	0	0	1	0	0	0	0	0	0	0	0	0	0	0	0	0	0	0	1	0	0	0	0	0
lysine	1	1	1	1	1	1	1	1	1	1	1	1	1	1	1	1	1	1	1	1	1	1	1	1	1	1	1	1	1	1	1	1	1	1	1	1	1	1	1	1	1	1	1	1	1	1	1	1	1
malate	1	1	1	1	1	1	1	1	1	1	1	1	1	1	1	1	1	1	1	1	1	1	1	1	1	1	1	1	1	1	1	1	1	1	1	1	1	1	1	1	1	1	1	1	1	1	1	1	1
malonyl-CoA	1	1	1	1	1	1	1	1	1	1	1	1	1	1	1	1	1	1	1	1	1	1	1	1	1	1	1	1	1	1	1	1	1	1	1	1	1	1	1	1	1	1	1	1	1	1	1	1	1
malonyl-[ACP]	1	1	1	1	1	1	1	1	1	1	1	1	1	1	1	1	1	1	1	1	1	1	1	1	1	1	1	1	1	1	1	1	1	1	1	1	1	1	1	1	1	1	1	1	1	1	1	1	1
margaric acid	1	1	1	1	1	1	1	1	1	1	1	1	1	1	1	1	1	1	1	1	1	1	1	1	1	1	1	1	1	1	1	1	1	1	1	1	1	1	1	1	1	1	1	1	1	1	1	1	1
mead acid	1	1	1	1	1	1	1	1	1	1	1	1	1	1	1	1	1	1	1	1	1	1	1	1	1	1	1	1	1	1	1	1	1	1	1	1	1	1	1	1	1	1	1	1	1	1	1	1	1
methionine	1	1	1	1	1	1	1	1	1	1	1	1	1	1	1	1	1	1	1	1	1	1	1	1	1	1	1	1	1	1	1	1	1	1	1	1	1	1	1	1	1	1	1	1	1	1	1	1	1
methylglyoxal	0	0	0	1	0	1	0	0	0	0	0	0	0	0	1	0	1	0	0	0	0	1	0	0	1	0	0	0	0	0	0	0	0	0	0	0	0	0	0	0	0	0	0	1	0	1	1	0	0
methylmalonyl-CoA	0	1	1	0	0	0	1	1	0	1	0	1	0	1	0	1	1	0	0	0	0	0	0	1	0	0	1	1	1	0	1	0	0	0	0	1	1	0	1	0	1	1	1	1	1	0	0	0	1
methylthioribose-1p	0	0	0	0	0	0	0	0	0	0	0	0	0	0	0	0	0	0	1	0	0	0	0	0	0	0	0	0	0	0	0	0	0	0	0	0	0	0	0	0	0	0	0	1	0	0	0	0	0
mitooxidized thioredoxin	0	0	0	0	0	0	0	0	0	1	0	0	0	0	0	0	0	0	0	0	0	0	0	0	0	0	0	0	0	0	0	0	0	0	0	0	0	0	0	0	0	0	0	0	1	0	0	0	0
mitothioredoxin	0	0	0	0	0	0	0	0	0	1	0	0	0	0	0	0	0	0	0	0	0	0	0	0	0	0	0	0	0	0	0	0	0	0	0	0	0	0	0	0	0	0	0	0	1	0	0	0	0
myristic acid	1	1	1	1	1	1	1	1	1	1	1	1	1	1	1	1	1	1	1	1	1	1	1	1	1	1	1	1	1	1	1	1	1	1	1	1	1	1	1	1	1	1	1	1	1	1	1	1	1
myristoyl-CoA	1	1	1	1	1	1	1	1	1	1	1	1	1	1	1	1	1	1	1	1	1	1	1	1	1	1	1	1	1	1	1	1	1	1	1	1	1	1	1	1	1	1	1	1	1	1	1	1	1
nervonic acid	1	1	1	1	1	1	1	1	1	1	1	1	1	1	1	1	1	1	1	1	1	1	1	1	1	1	1	1	1	1	1	1	1	1	1	1	1	1	1	1	1	1	1	1	1	1	1	1	1
nicotinamide	0	1	0	0	0	1	0	1	1	0	1	0	0	1	0	0	1	0	0	1	0	0	0	1	0	1	0	0	0	0	0	1	0	1	0	0	1	0	0	0	0	1	0	1	0	0	0	0	0
nicotinamide D-ribonucleotide	0	1	0	0	0	1	0	1	1	0	1	0	0	1	0	0	1	0	0	1	0	0	0	1	0	1	0	0	0	0	0	1	0	1	0	0	1	0	0	0	0	1	0	1	0	0	0	0	0
nicotinamide ribonucleoside	0	0	0	0	0	0	0	1	0	0	0	0	0	1	0	0	0	0	0	0	0	0	0	1	0	0	0	0	0	0	0	0	0	0	0	0	1	0	0	0	0	1	0	1	0	0	0	0	0
nonadecanoyl-CoA	1	1	1	1	1	1	1	1	1	1	1	1	1	1	1	1	1	1	1	1	1	1	1	1	1	1	1	1	1	1	1	1	1	1	1	1	1	1	1	1	1	1	1	1	1	1	1	1	1
nonadecanoylcarnitine	1	1	1	1	1	1	1	1	1	1	1	1	1	1	1	1	1	1	1	1	0	1	1	1	1	1	1	1	1	1	1	1	1	1	1	1	1	1	1	1	1	1	1	1	1	1	1	1	1
nonadecylic acid	1	1	1	1	1	1	1	1	1	1	1	1	1	1	1	1	1	1	1	1	1	1	1	1	1	1	1	1	1	1	1	1	1	1	1	1	1	1	1	1	1	1	1	1	1	1	1	1	1
nonanoyl-CoA	1	1	1	1	1	1	1	1	1	1	1	1	1	1	1	1	1	1	1	1	1	1	1	0	1	1	1	1	1	1	1	1	1	1	1	1	1	1	1	1	1	1	1	1	1	1	1	1	1
nonanoyl-[ACP]	0	0	0	0	0	0	0	0	0	0	0	0	0	0	0	0	0	0	0	0	0	0	0	1	0	0	0	0	0	0	0	0	0	0	0	0	0	0	0	0	0	0	0	1	0	0	0	0	0
ocosatetraenoylcarnitine	1	1	1	1	1	1	1	1	1	1	1	1	1	1	1	1	1	1	1	1	1	1	1	1	1	1	1	1	1	1	1	1	1	1	1	1	1	1	1	1	1	1	1	1	1	1	1	1	1
octadecatrienoylcarnitine	1	1	1	1	1	1	1	1	1	1	1	1	1	1	1	1	1	1	1	1	1	1	1	1	1	1	1	1	1	1	1	1	1	1	1	1	1	1	1	1	1	1	1	1	1	1	1	1	1
octadecenoylcarnitine(11)	1	1	1	1	1	1	1	1	1	1	1	1	1	1	1	1	1	1	1	1	0	1	1	1	1	1	1	1	1	1	1	1	1	1	1	1	1	1	1	1	1	1	1	1	1	1	1	1	1
octadecenoylcarnitine(5)	1	1	1	1	1	1	1	1	1	1	1	1	1	1	1	1	1	1	1	1	0	1	1	1	1	1	1	1	1	1	1	1	1	1	1	1	1	1	1	1	1	1	1	1	1	1	1	1	1
octadecenoylcarnitine(7)	0	1	0	1	1	1	0	1	0	1	1	0	1	1	1	1	1	1	1	1	1	1	1	1	1	0	1	1	1	1	1	1	1	1	1	1	1	1	0	1	1	1	1	1	0	1	1	1	0
octanoyl-CoA	1	1	1	1	1	1	1	1	1	1	1	1	1	1	1	1	1	1	1	1	1	1	1	1	1	1	1	1	1	1	1	1	1	1	1	1	1	1	1	1	1	1	1	1	1	1	1	1	1
oleate	1	1	1	1	1	1	1	1	1	1	1	1	1	1	1	1	1	1	1	1	1	1	1	1	1	1	1	1	1	1	1	1	1	1	1	1	1	1	1	1	1	1	1	1	1	1	1	1	1
oleoyl-CoA	1	1	1	1	1	1	1	1	1	1	1	1	1	1	1	1	1	1	1	1	1	1	1	1	1	1	1	1	1	1	1	1	1	1	1	1	1	1	1	1	1	1	1	1	1	1	1	1	1
ornithine	0	0	0	0	0	0	0	0	0	0	0	0	0	0	0	0	0	0	0	0	0	0	0	1	0	0	0	0	0	0	0	0	0	0	0	0	0	0	0	0	0	0	0	1	0	0	0	0	0
orotate	1	1	1	1	1	1	1	1	1	1	1	1	1	1	1	1	1	1	1	1	1	1	1	1	1	1	1	1	1	1	1	1	1	1	1	1	1	1	1	1	1	1	1	1	1	1	1	1	1
orotidine-5-phosphate	1	1	1	1	1	1	1	1	1	1	1	1	1	1	1	1	1	1	1	1	1	1	1	1	1	1	1	1	1	1	1	1	1	1	1	1	1	1	1	1	1	1	1	1	1	1	1	1	1
oxalosuccinate	0	0	0	0	0	0	0	0	0	1	0	0	0	0	0	0	0	0	0	0	0	0	0	1	0	0	0	0	0	0	0	0	0	0	0	0	0	0	0	0	0	0	0	1	0	0	0	0	0
oxidized thioredoxin	1	1	1	1	1	1	1	1	1	1	1	1	1	1	1	1	1	1	1	1	1	1	1	1	1	1	1	1	1	1	1	1	1	1	1	1	1	1	1	1	1	1	1	1	1	1	1	1	1
palmitate	1	1	1	1	1	1	1	1	1	1	1	1	1	1	1	1	1	1	1	1	1	1	1	1	1	1	1	1	1	1	1	1	1	1	1	1	1	1	1	1	1	1	1	1	1	1	1	1	1
palmitolate	1	1	1	1	1	1	1	1	1	1	1	1	1	1	1	1	1	1	1	1	1	1	1	1	1	1	1	1	1	1	1	1	1	1	1	1	1	1	1	1	1	1	1	1	1	1	1	1	1
palmitoleoyl-CoA	1	1	1	1	1	1	1	1	1	1	1	1	1	1	1	1	1	1	1	1	1	1	1	1	1	1	1	1	1	1	1	1	1	1	1	1	1	1	1	1	1	1	1	1	1	1	1	1	1
palmitoleoyl-carnitine	1	1	1	1	1	1	1	1	1	1	1	1	1	1	1	1	1	1	1	1	1	1	1	1	1	1	1	1	1	1	1	1	1	1	1	1	1	1	1	1	1	1	1	1	1	1	1	1	1
palmitoyl-CoA	1	1	1	1	1	1	1	1	1	1	1	1	1	1	1	1	1	1	1	1	1	1	1	1	1	1	1	1	1	1	1	1	1	1	1	1	1	1	1	1	1	1	1	1	1	1	1	1	1
pentadecanoyl-CoA	1	1	1	1	1	1	1	1	1	1	1	1	1	1	1	1	1	1	1	1	1	1	1	1	1	1	1	1	1	1	1	1	1	1	1	1	1	1	1	1	1	1	1	1	1	1	1	1	1
pentadecanoyl-[ACP]	0	0	0	0	0	0	0	0	0	0	0	0	0	0	0	0	0	0	0	0	0	0	0	1	0	0	0	0	0	0	0	0	0	0	0	0	0	0	0	0	0	0	0	1	0	0	0	0	0
pentadecanoylcarnitine	1	1	1	1	1	1	1	1	1	1	1	1	1	1	1	1	1	1	1	1	1	1	1	1	1	1	1	1	1	1	1	1	1	1	1	1	1	1	1	1	1	1	1	1	1	1	1	1	1
pentadecylic acid	1	1	1	1	1	1	1	1	1	1	1	1	1	1	1	1	1	1	1	1	1	1	1	1	1	1	1	1	1	1	1	1	1	1	1	1	1	1	1	1	1	1	1	1	1	1	1	1	1
pentanoyl-CoA	1	1	1	1	1	1	1	1	1	1	1	1	1	1	1	1	1	1	1	1	1	1	1	0	1	1	1	1	1	1	1	1	1	1	1	1	1	1	1	1	1	1	1	1	1	1	1	1	1
pentanoyl-[ACP]	0	0	0	0	0	0	0	0	0	0	0	0	0	0	0	0	0	0	0	0	0	0	0	1	0	0	0	0	0	0	0	0	0	0	0	0	0	0	0	0	0	0	0	1	0	0	0	0	0
phenylalanine	1	1	1	1	1	1	1	1	1	1	1	1	1	1	1	1	1	1	1	1	1	1	1	1	1	1	1	1	1	1	1	1	1	1	1	1	1	1	1	1	1	1	1	1	1	1	1	1	1
phosphatidate-CL pool	1	1	1	1	1	1	1	1	1	1	1	1	1	1	1	1	1	1	1	1	1	1	1	1	1	1	1	1	1	1	1	1	1	1	1	1	1	1	1	1	1	1	1	1	1	1	1	1	1
phosphatidate-LD-PC pool	1	1	1	1	1	1	1	1	1	1	1	1	1	1	1	1	1	1	1	1	1	1	1	1	1	1	1	1	1	1	1	1	1	1	1	1	1	1	1	1	1	1	1	1	1	1	1	1	1
phosphatidate-LD-PE pool	0	1	1	0	1	0	1	0	0	1	1	1	1	1	1	0	1	1	1	0	0	0	1	1	1	0	1	1	1	0	0	1	0	0	0	0	0	0	1	1	1	1	1	1	0	1	1	1	0
phosphatidate-LD-PI pool	1	1	1	1	1	1	1	1	1	1	1	1	1	1	1	1	1	1	1	1	1	1	1	1	1	1	1	1	1	1	1	1	1	1	1	1	1	1	1	1	1	1	1	1	1	1	1	1	1
phosphatidate-LD-PS pool	1	1	1	1	1	1	1	1	1	1	1	1	1	1	1	1	1	1	1	1	1	1	1	1	1	1	1	1	1	1	1	1	1	1	1	1	1	1	1	1	1	1	1	1	1	1	1	1	1
phosphatidate-LD-SM pool	1	0	0	0	0	0	1	0	0	0	1	1	0	0	0	0	0	0	1	1	1	1	0	0	0	0	1	0	0	0	1	1	0	0	0	0	0	1	0	0	0	0	0	1	0	0	0	1	0
phosphatidate-LD-TAG pool	1	1	1	1	1	1	1	1	1	1	1	1	1	1	1	1	1	1	1	1	1	1	1	1	1	1	1	1	1	1	1	1	1	1	1	1	1	1	1	1	1	1	1	1	1	1	1	1	1
phosphatidylinositol-3,4,5-trisphosphate	0	0	0	0	0	0	0	0	0	0	0	0	0	0	0	0	0	0	0	0	0	0	0	1	0	0	0	0	0	0	0	0	0	0	0	0	0	0	0	0	0	0	0	1	0	0	0	0	0
phosphatidylinositol-4,5-bisphosphate	0	0	0	0	0	0	0	0	0	0	0	1	0	0	0	0	0	0	0	0	1	0	1	1	1	0	0	0	0	0	0	0	0	0	1	0	0	0	0	0	0	0	0	1	0	0	0	0	0
phosphocholine	1	1	1	1	1	1	1	1	1	1	1	1	1	1	1	1	1	1	1	1	1	1	1	1	1	1	1	1	1	1	1	1	1	1	1	1	1	1	1	1	1	1	1	1	1	1	1	1	1
physeteric acid	1	1	1	1	1	1	1	1	1	1	1	1	1	1	1	1	1	1	1	1	1	1	1	1	1	1	1	1	1	1	1	1	1	1	1	1	1	1	1	1	1	1	1	1	1	1	1	1	1
presqualene-PP	1	1	1	1	1	1	1	1	1	1	1	1	1	1	1	1	1	1	1	1	1	1	1	1	1	1	1	1	1	1	1	1	1	1	1	1	1	1	1	1	1	1	1	1	1	1	1	1	1
proline	1	1	1	1	1	1	1	1	1	1	1	1	1	1	1	1	1	1	1	1	1	1	1	1	1	1	1	1	1	1	1	1	1	1	1	1	1	1	1	1	1	1	1	1	1	1	1	1	1
propanoyl-CoA	1	1	1	1	1	1	1	1	1	1	1	1	1	1	1	1	1	1	1	1	1	1	1	1	1	1	1	1	1	1	1	1	1	1	1	1	1	1	1	1	1	1	1	1	1	1	1	1	1
propanoyl-[ACP]	0	0	0	0	0	0	0	0	0	0	0	0	0	0	0	0	0	0	0	0	0	0	0	1	0	0	0	0	0	0	0	0	0	0	0	0	0	0	0	0	0	0	0	1	0	0	0	0	0
prostaglandin E2	0	0	0	0	0	0	0	0	0	0	0	0	0	0	0	0	0	0	0	0	0	0	0	1	0	0	0	0	0	0	0	0	0	0	0	0	0	0	0	0	0	0	0	1	0	0	0	0	0
provitamin D3	1	0	0	0	0	0	0	0	0	1	0	0	0	1	0	0	0	0	0	0	0	0	0	1	0	0	0	1	0	0	0	0	0	0	0	0	1	0	1	0	0	1	1	1	0	0	1	0	0
putrescine	0	0	0	0	0	0	0	0	0	0	0	0	0	0	0	0	0	0	0	0	0	0	0	0	0	0	0	0	0	0	0	0	0	0	0	0	0	0	0	0	0	0	0	1	0	0	0	0	0
pyruvate	1	1	1	1	1	1	1	1	1	1	1	1	1	1	1	1	1	1	1	1	1	1	1	1	1	1	1	1	1	1	1	1	1	1	1	1	1	1	1	1	1	1	1	1	1	1	1	1	1
reverse triiodthyronine	0	0	0	0	0	0	0	0	0	0	0	0	0	0	0	0	0	0	0	0	0	0	0	1	0	0	0	0	0	0	0	0	0	0	0	0	0	0	0	0	0	0	0	1	0	0	0	0	0
ribose-1-phosphate	0	0	0	0	0	0	0	1	0	1	0	0	0	1	1	0	1	0	0	0	1	0	0	1	0	1	1	1	1	0	1	0	1	0	0	1	1	1	1	0	1	1	0	1	1	0	0	0	1
ribose-5-phosphate	1	1	1	1	1	1	1	1	1	1	1	1	1	1	1	1	1	1	1	1	1	1	1	1	1	1	1	1	1	1	1	1	1	1	1	1	1	1	1	1	1	1	1	1	1	1	1	1	1
ribulose-5-phosphate	1	1	1	1	1	1	1	1	1	1	1	1	1	1	1	1	1	1	1	1	1	1	1	1	1	0	1	1	1	1	1	1	1	0	1	1	1	1	1	1	1	1	1	1	1	1	1	1	1
sarcosine	1	1	1	0	1	0	0	0	1	0	0	0	0	0	0	0	0	0	0	0	0	0	0	1	0	0	0	0	0	0	0	0	0	0	0	0	0	0	0	1	0	0	1	1	0	0	0	0	0
sedoheptulose-7-phosphate	0	0	0	0	0	0	0	1	0	1	0	0	0	1	0	0	0	0	0	0	0	0	0	1	0	0	0	1	0	0	0	0	0	0	0	1	0	0	1	0	1	1	0	1	1	0	0	0	0
serine	1	1	1	1	1	1	1	1	1	1	1	1	1	1	1	1	1	1	1	1	1	1	1	1	1	1	1	1	1	1	1	1	1	1	1	1	1	1	1	1	1	1	1	1	1	1	1	1	1
sn-glycerol-3-PE	1	0	0	0	0	1	0	1	0	0	0	0	0	0	0	1	0	0	0	1	1	0	0	0	0	0	0	0	0	0	0	0	0	0	0	1	1	0	0	0	0	0	0	1	1	0	0	0	1
sn-glycerol-3-phosphate	1	1	1	1	1	1	1	1	1	1	1	1	1	1	1	1	1	1	1	1	1	1	1	1	1	1	1	1	1	1	1	1	1	1	1	1	1	1	1	1	1	1	1	1	1	1	1	1	1
spermidine	0	0	0	0	0	0	0	0	0	0	0	0	0	0	0	0	0	0	1	0	0	0	0	1	0	0	0	0	0	0	0	0	0	0	0	0	0	0	0	0	0	0	0	1	0	0	0	0	0
spermine	0	0	0	0	0	0	0	0	0	0	0	0	0	0	0	0	0	0	1	0	0	0	0	1	0	0	0	0	0	0	0	0	0	0	0	0	0	0	0	0	0	0	0	1	0	0	0	0	0
sphinganine	1	1	1	1	1	1	1	1	1	1	1	1	1	1	1	1	1	1	1	1	1	1	1	1	1	1	1	1	1	1	1	1	1	1	1	1	1	1	1	1	1	1	1	1	1	1	1	1	1
sphinganine-1-phosphate	1	0	1	1	0	1	1	0	0	0	1	1	0	0	0	1	0	0	1	1	1	1	0	1	0	0	1	0	1	0	1	1	0	0	0	0	0	1	0	0	0	0	0	1	0	1	1	1	0
sphingosine	1	1	1	1	0	1	1	1	1	1	1	1	1	0	1	1	0	1	1	1	1	1	0	1	1	1	1	0	1	1	1	1	0	1	0	1	0	1	1	0	0	0	1	1	1	1	1	1	1
sphingosine-1-phosphate	1	1	1	1	0	1	1	1	1	1	1	1	1	0	1	1	0	1	1	1	1	1	0	1	1	1	1	0	1	1	1	1	0	1	0	1	0	1	1	0	0	0	1	1	1	1	1	1	1
sphingosylphosphorylcholine	0	0	0	1	0	1	0	0	0	0	0	0	0	0	0	1	0	0	0	0	0	0	0	1	0	0	0	0	1	0	0	0	0	0	0	0	0	0	0	0	0	0	0	1	0	1	1	0	0
squalene	1	1	1	1	1	1	1	1	1	1	1	1	1	1	1	1	1	1	1	1	1	1	1	1	1	1	1	1	1	1	1	1	1	1	1	1	1	1	1	1	1	1	1	1	1	1	1	1	1
squalene 2,3-oxide	1	1	1	1	1	1	1	1	1	1	1	1	1	1	1	1	1	1	1	1	1	1	1	1	1	1	1	1	1	1	1	1	1	1	1	1	1	1	1	1	1	1	1	1	1	1	1	1	1
stearate	1	1	1	1	1	1	1	1	1	1	1	1	1	1	1	1	1	1	1	1	1	1	1	1	1	1	1	1	1	1	1	1	1	1	1	1	1	1	1	1	1	1	1	1	1	1	1	1	1
stearidonic acid	1	1	1	1	1	1	1	1	1	1	1	1	1	1	1	1	1	1	1	1	1	1	1	1	1	1	1	1	1	1	1	1	1	1	1	1	1	1	1	1	1	1	1	1	1	1	1	1	1
stearoyl-CoA	1	1	1	1	1	1	1	1	1	1	1	1	1	1	1	1	1	1	1	1	1	1	1	1	1	1	1	1	1	1	1	1	1	1	1	1	1	1	1	1	1	1	1	1	1	1	1	1	1
stearoylcarnitine	1	1	1	1	1	1	1	1	1	1	1	1	1	1	1	1	1	1	1	1	1	1	1	1	1	1	1	1	1	1	1	1	1	1	1	1	1	1	1	1	1	1	1	1	1	1	1	1	1
succinate	1	1	1	1	1	1	1	1	1	1	1	1	1	1	1	1	1	1	1	1	1	1	1	1	1	1	1	1	1	1	1	1	1	1	1	1	1	1	1	1	1	1	1	1	1	1	1	1	1
succinate semialdehyde	0	0	0	0	0	0	0	0	0	0	0	0	0	0	0	0	0	0	0	0	0	0	0	0	0	0	0	0	0	0	0	0	0	0	0	0	0	0	0	0	0	0	0	0	0	0	0	0	0
succinyl-CoA	1	1	1	1	1	1	1	1	1	1	1	1	1	1	1	1	1	1	1	1	1	1	1	1	1	1	1	1	1	1	1	1	1	1	1	1	1	1	1	1	1	1	1	1	1	1	1	1	1
sulfate	0	0	0	0	0	0	0	0	0	1	0	0	1	0	1	0	0	0	0	1	1	0	1	1	0	0	0	0	0	0	0	0	0	0	0	0	0	0	0	0	0	0	0	1	0	0	0	0	0
sulfochenodeoxycholate	0	0	0	0	0	0	0	0	0	0	0	0	0	0	0	0	0	0	0	0	0	0	0	0	0	0	0	0	0	0	0	0	0	0	0	0	0	0	0	0	0	0	0	0	0	0	0	0	0
sulfotaurolithocholate	0	0	0	0	0	0	0	0	0	0	0	0	0	0	0	0	0	0	0	0	0	0	0	0	0	0	0	0	0	0	0	0	0	0	0	0	0	0	0	0	0	0	0	1	0	0	0	0	0
taurolithocholate	0	0	0	0	0	0	0	0	0	0	0	0	0	0	0	0	0	0	0	0	0	0	0	0	0	0	0	0	0	0	0	0	0	0	0	0	0	0	0	0	0	0	0	0	0	0	0	0	0
tetracosanoyl-CoA	1	1	1	1	1	1	1	1	1	1	1	1	1	1	1	1	1	1	1	1	1	1	1	1	1	1	1	1	1	1	1	1	1	1	1	1	1	1	1	1	1	1	1	1	1	1	1	1	1
tetracosanoylcarnitine	1	1	1	1	1	1	1	1	1	1	1	1	1	1	1	1	1	1	1	1	0	1	1	1	1	1	1	1	1	1	1	1	1	1	1	1	1	1	1	1	1	1	1	1	1	1	1	1	1
tetradecanoylcarnitine	1	1	1	1	1	1	1	1	1	1	1	1	1	1	1	1	1	1	1	1	1	1	1	1	1	1	1	1	1	1	1	1	1	1	1	1	1	1	1	1	1	1	1	1	1	1	1	1	1
tetradecenoylcarnitine(5)	1	1	1	1	1	1	1	1	1	1	1	1	1	1	1	1	1	1	1	1	0	1	1	1	1	1	1	1	1	1	1	1	1	1	1	1	1	1	1	1	1	1	1	1	1	1	1	1	1
tetradecenoylcarnitine(7)	1	1	1	1	1	1	1	1	1	1	1	1	1	1	1	1	1	1	1	1	0	1	1	1	1	1	1	1	1	1	1	1	1	1	1	1	1	1	1	1	1	1	1	1	1	1	1	1	1
tetradecenoylcarnitine(9)	1	1	1	1	1	1	1	1	1	1	1	1	1	1	1	1	1	1	1	1	1	1	1	1	1	1	1	1	1	1	1	1	1	1	1	1	1	1	1	1	1	1	1	1	1	1	1	1	1
thiamin-PP	0	0	0	0	0	0	0	0	0	0	0	0	0	0	0	0	0	0	0	0	0	0	0	1	0	0	0	0	0	0	0	0	0	0	0	0	0	0	0	0	0	0	0	1	0	0	0	0	0
thioredoxin	1	1	1	1	1	1	1	1	1	1	1	1	1	1	1	1	1	1	1	1	1	1	1	1	1	1	1	1	1	1	1	1	1	1	1	1	1	1	1	1	1	1	1	1	1	1	1	1	1
threonine	1	1	1	1	1	1	1	1	1	1	1	1	1	1	1	1	1	1	1	1	1	1	1	1	1	1	1	1	1	1	1	1	1	1	1	1	1	1	1	1	1	1	1	1	1	1	1	1	1
thymidine	0	0	0	0	0	0	0	0	0	1	0	0	0	0	0	0	0	0	0	0	0	0	0	1	0	0	0	0	0	0	0	0	0	0	0	0	0	0	0	0	0	0	0	1	1	0	0	0	0
tiglyl-CoA	0	0	0	0	0	0	0	0	0	0	0	0	0	0	0	0	0	0	0	0	0	0	0	1	0	0	0	0	0	0	0	0	0	0	0	0	0	0	1	0	0	0	0	1	0	0	0	0	0
trans,cis,cis,cis,cis-2,10,13,16,19-docosapentaenoyl-CoA	0	0	0	1	0	1	1	1	1	1	0	0	0	1	1	1	0	0	0	0	1	1	0	1	0	0	0	0	1	0	0	0	0	0	1	0	0	1	0	0	0	0	0	1	0	1	1	1	0
trans,cis,cis,cis,cis-2,12,15,18,21-tetracosapentaenoyl-CoA	0	0	1	1	0	1	1	1	1	0	0	0	0	1	1	1	0	0	0	0	1	1	0	1	0	0	0	0	1	0	0	0	0	0	1	0	0	1	0	1	0	0	0	1	1	1	1	1	0
trans,cis,cis,cis-2,10,13,16-docosatetraenoyl-CoA	0	0	0	1	0	1	1	0	1	0	0	0	1	1	1	1	0	1	0	0	1	1	0	1	1	0	0	1	0	0	0	0	0	0	1	0	0	1	0	0	0	0	0	1	0	1	1	1	1
trans,cis,cis,cis-2,11,14,17-eicosatetraenoyl-CoA	0	0	0	0	0	0	0	0	0	0	0	0	0	0	0	0	0	0	0	0	0	0	0	1	0	0	0	0	0	0	0	0	0	0	0	0	0	0	0	0	0	0	0	1	0	0	0	0	0
trans,cis,cis,cis-2,13,16,19-docosatetraenoyl-CoA	1	1	1	1	1	1	1	1	1	1	1	0	1	1	1	1	1	1	0	1	1	1	1	1	0	1	1	0	0	1	0	1	1	1	1	0	0	1	0	0	0	0	1	1	1	1	1	1	0
trans,cis,cis-2,11,14-eicosatrienoyl-CoA	0	0	0	0	0	0	0	0	1	0	0	0	0	1	0	0	0	0	0	0	0	0	0	1	0	0	0	1	0	0	0	0	0	0	0	1	0	0	0	0	0	0	0	1	1	0	0	1	1
trans,cis,cis-2,13,16-docasatrienoyl-CoA	1	0	0	1	1	1	1	1	1	0	1	0	1	1	1	1	1	1	1	1	1	1	1	1	1	1	1	1	1	1	1	1	1	1	1	1	0	1	0	1	0	0	1	1	0	1	1	1	0
trans,cis,cis-2,7,10-hexadecatrienoyl-CoA	1	0	0	1	0	1	1	1	1	1	1	1	0	1	1	1	1	0	1	1	1	0	0	0	0	1	1	1	1	1	1	0	1	1	1	1	0	0	0	1	0	0	1	1	1	1	1	0	0
trans,cis-2,11-docosadienoyl-CoA	0	0	0	1	0	1	1	0	1	0	0	0	0	1	1	1	0	0	0	0	1	1	0	1	0	0	0	0	0	0	0	0	0	0	1	0	0	1	0	0	0	0	0	1	1	1	1	1	0
trans,cis-2,11-eicosadienoyl-CoA	1	1	1	1	1	1	1	1	1	1	1	1	1	1	1	1	1	1	1	1	1	1	1	1	1	1	1	1	1	1	1	1	1	1	1	1	1	1	1	1	1	1	1	1	1	1	1	1	1
trans,cis-2,13-docosadienoyl-CoA	1	1	1	1	1	1	1	1	1	1	1	1	1	1	1	1	1	1	1	1	1	1	1	1	1	1	1	1	1	1	1	1	1	1	1	1	1	1	1	1	1	1	1	1	1	1	1	1	1
trans,cis-2,13-eicosadienoyl-CoA	1	0	0	1	1	1	1	1	1	1	1	1	1	1	1	1	0	1	0	1	1	1	1	1	0	1	1	1	0	1	0	1	1	1	1	1	1	1	0	1	1	1	1	1	1	1	1	1	0
trans,cis-2,15-tetracosadienoyl-CoA	1	1	1	1	1	1	1	1	1	1	1	1	1	1	1	1	1	1	1	1	1	1	1	1	1	1	1	1	1	1	1	1	1	1	1	1	1	1	1	1	1	1	1	1	1	1	1	1	1
trans,cis-2,17-hexacosadienoyl-CoA	1	1	1	1	1	1	1	1	1	1	1	1	1	1	1	1	1	1	1	1	1	1	1	1	1	1	1	1	1	1	1	1	1	1	1	1	1	1	1	1	1	1	1	1	1	1	1	1	1
trans,cis-2,8,11-eicosatrienoyl-CoA	1	0	0	1	0	1	1	0	1	0	1	0	1	1	1	1	0	1	0	1	1	1	1	1	0	0	0	1	0	0	0	1	1	1	1	0	0	1	0	0	0	0	1	1	0	1	1	1	0
trans,cis-2,9-eicosadienoyl-CoA	1	0	0	1	1	1	1	1	1	0	1	0	1	1	1	1	0	1	0	1	1	1	1	1	0	1	1	1	0	1	0	1	1	1	1	1	0	1	0	1	0	1	1	1	0	1	1	1	0
trans,cis-hexadeca-2,7-dienoyl-CoA	1	1	1	1	1	1	1	1	1	1	1	1	1	1	1	1	1	1	1	1	1	1	1	1	1	1	1	1	1	1	1	1	1	1	1	1	1	1	1	1	1	1	1	1	1	1	1	1	1
trans,cis-hexadeca-2,9-dienoyl-CoA	1	1	1	1	1	1	1	1	1	1	1	1	1	1	1	1	1	1	1	1	1	1	1	1	1	1	1	1	1	1	1	1	1	1	1	1	1	1	1	1	1	1	1	1	1	1	1	1	1
trans,cis-lauro-2,6-dienoyl-CoA	1	0	0	1	0	1	1	1	1	1	1	1	0	1	1	1	1	0	1	1	1	0	0	0	0	1	1	1	1	1	1	0	1	1	1	1	0	0	0	1	0	0	1	1	1	1	1	0	0
trans,cis-myristo-2,5-dienoyl-CoA	1	1	1	1	1	1	1	1	1	1	1	1	1	1	1	1	1	1	1	1	1	1	1	1	1	1	1	1	1	1	1	1	1	1	1	1	1	1	1	1	1	1	1	1	1	1	1	1	1
trans,cis-myristo-2,7-dienoyl-CoA	1	1	1	1	1	1	1	1	1	1	1	1	1	1	1	1	1	1	1	1	1	1	1	1	1	1	1	1	1	1	1	1	1	1	1	1	1	1	1	1	1	1	1	1	1	1	1	1	1
trans,cis-octadeca-2,11-dienoyl-CoA	1	0	0	0	1	0	0	1	0	1	1	1	1	0	0	0	0	0	0	1	0	0	1	1	0	1	1	1	0	1	0	1	1	1	0	1	1	0	0	1	1	0	1	1	1	0	0	0	0
trans,cis-octadeca-2,9-dienoyl-CoA	1	1	1	1	1	1	1	1	1	1	1	1	1	1	1	1	1	1	1	1	1	1	1	1	1	1	1	1	1	1	1	1	1	1	1	1	1	1	1	1	1	1	1	1	1	1	1	1	1
trans-2-all-cis-6,9,12,15,18-tetracosahexaenoyl-CoA	1	0	0	0	1	0	1	1	1	1	1	1	1	0	1	0	0	1	0	1	0	1	1	1	0	1	1	1	0	1	0	1	1	1	1	1	1	0	0	1	1	1	1	0	1	1	0	1	0
trans-2-cis,cis,cis-8,11,14-eicosatetraenoyl-CoA	1	1	1	1	1	1	1	0	0	1	1	1	1	0	0	1	1	1	1	1	0	1	1	1	1	0	1	1	1	1	1	0	1	1	1	0	1	1	1	1	1	1	0	0	1	0	1	1	1
trans-2-cis,cis-5,8-tetradecatrienoyl-CoA	1	0	0	1	0	1	1	1	1	1	1	1	0	1	1	1	1	0	1	1	1	0	0	0	0	1	1	1	1	1	1	0	1	1	1	1	0	0	0	1	0	0	1	1	1	1	1	0	0
trans-3-cis-8,11,14-eicosatetraenoyl-CoA	1	0	0	1	0	1	1	0	0	1	1	1	1	0	0	1	0	1	1	0	0	0	0	0	1	0	1	1	1	1	1	0	1	1	1	0	0	0	0	1	0	0	0	0	1	0	1	0	0
trans-3-decenoyl-CoA	1	0	0	1	0	1	1	1	1	1	1	1	0	1	1	1	1	0	1	1	1	0	0	1	0	1	1	1	1	1	1	0	1	1	1	1	0	0	0	1	0	0	1	1	1	1	1	0	0
trans-4-hydroxy-L-proline	1	0	1	0	1	0	1	1	0	1	0	1	1	1	1	1	0	1	1	0	1	0	1	1	1	0	0	1	1	1	0	0	1	0	1	1	1	1	1	1	1	1	1	1	1	1	1	1	1
tricosanoic acid	1	1	1	1	1	1	1	1	1	1	1	1	1	1	1	1	1	1	1	1	1	1	1	1	1	1	1	1	1	1	1	1	1	1	1	1	1	1	1	1	1	1	1	1	1	1	1	1	1
tricosanoyl-CoA	1	1	1	1	1	1	1	1	1	1	1	1	1	1	1	1	1	1	1	1	1	1	1	1	1	1	1	1	1	1	1	1	1	1	1	1	1	1	1	1	1	1	1	1	1	1	1	1	1
tridecanoyl-CoA	1	1	1	1	1	1	1	1	1	1	1	1	1	1	1	1	1	1	1	1	1	1	1	1	1	1	1	1	1	1	1	1	1	1	1	1	1	1	1	1	1	1	1	1	1	1	1	1	1
tridecanoyl-[ACP]	0	0	0	0	0	0	0	0	0	0	0	0	0	0	0	0	0	0	0	0	0	0	0	1	0	0	0	0	0	0	0	0	0	0	0	0	0	0	0	0	0	0	0	1	0	0	0	0	0
tridecanoylcarnitine	1	1	1	1	1	1	1	1	1	1	1	1	1	1	1	1	1	1	1	1	0	1	1	1	1	1	1	1	1	1	1	1	1	1	1	1	1	1	1	1	1	1	1	1	1	1	1	1	1
tridecylic acid	1	1	1	1	1	1	1	1	1	1	1	1	1	1	1	1	1	1	1	1	1	1	1	1	1	1	1	1	1	1	1	1	1	1	1	1	1	1	1	1	1	1	1	1	1	1	1	1	1
tryptophan	1	1	1	1	1	1	1	1	1	1	1	1	1	1	1	1	1	1	1	1	1	1	1	1	1	1	1	1	1	1	1	1	1	1	1	1	1	1	1	1	1	1	1	1	1	1	1	1	1
tyrosine	1	1	1	1	1	1	1	1	1	1	1	1	1	1	1	1	1	1	1	1	1	1	1	1	1	1	1	1	1	1	1	1	1	1	1	1	1	1	1	1	1	1	1	1	1	1	1	1	1
ubiquinol	1	1	1	1	1	1	1	1	1	1	1	1	1	1	1	1	1	1	1	1	1	1	1	1	1	1	1	1	1	1	1	1	1	1	1	1	1	1	1	1	1	1	1	1	1	1	1	1	1
ubiquinone	1	1	1	1	1	1	1	1	1	1	1	1	1	1	1	1	1	1	1	1	1	1	1	1	1	1	1	1	1	1	1	1	1	1	1	1	1	1	1	1	1	1	1	1	1	1	1	1	1
undecanoyl-CoA	1	1	1	1	1	1	1	1	1	1	1	1	1	1	1	1	1	1	1	1	1	1	1	0	1	1	1	1	1	1	1	1	1	1	1	1	1	1	1	1	1	1	1	1	1	1	1	1	1
undecanoyl-[ACP]	0	0	0	0	0	0	0	0	0	0	0	0	0	0	0	0	0	0	0	0	0	0	0	1	0	0	0	0	0	0	0	0	0	0	0	0	0	0	0	0	0	0	0	1	0	0	0	0	0
uracil	0	0	0	0	0	0	0	0	0	0	0	0	0	0	0	0	0	0	0	0	0	0	0	1	0	0	0	0	0	0	0	0	0	0	0	0	0	0	0	0	0	0	0	1	0	0	0	0	0
urate	0	0	0	0	0	0	0	0	0	0	0	0	0	0	0	0	0	0	0	0	0	0	0	1	0	0	0	0	0	0	0	0	0	0	0	0	0	0	0	0	0	0	0	1	0	0	0	0	0
urea	0	0	0	0	0	0	0	0	0	0	0	0	0	0	0	0	0	0	0	0	0	0	0	1	0	0	0	0	0	0	0	0	0	0	0	0	0	0	0	0	0	0	0	1	0	0	0	0	0
ursodeoxycholate	0	0	0	0	0	0	0	0	0	0	0	0	0	0	0	0	0	0	0	0	0	0	0	0	0	0	0	0	0	0	0	0	0	0	0	0	0	0	0	0	0	0	0	0	0	0	0	0	0
valine	1	1	1	1	1	1	1	1	1	1	1	1	1	1	1	1	1	1	1	1	1	1	1	1	1	1	1	1	1	1	1	1	1	1	1	1	1	1	1	1	1	1	1	1	1	1	1	1	1
xanthine	0	0	0	0	0	0	0	0	0	0	0	0	0	0	0	0	0	0	0	0	0	0	0	1	0	0	0	0	0	0	0	0	0	1	0	0	0	0	0	0	0	1	0	1	0	0	0	0	1
xanthosine-5-phosphate	1	1	1	1	1	1	1	1	1	1	1	1	1	1	1	1	1	1	1	1	1	1	1	1	1	1	1	1	1	1	1	1	1	1	1	1	1	1	1	1	1	1	1	1	1	1	1	1	1
ximenic acid	1	1	1	1	1	1	1	1	1	1	1	1	1	1	1	1	1	1	1	1	1	1	1	1	1	1	1	1	1	1	1	1	1	1	1	1	1	1	1	1	1	1	1	1	1	1	1	1	1
zymosterol	0	0	0	0	0	0	0	0	1	0	0	0	0	0	0	0	0	1	0	0	0	0	0	0	0	1	0	0	0	0	0	0	0	0	0	0	0	0	0	0	0	0	0	1	0	0	0	0	0
[truncated: 868 more columns]

## Sheet: Table S6
Metabolites	%in nonbasal	%in Basal	Fisher p	FDR
L-palmitoylcarnitine	97.8261	50.7246	1.19861e-46	1.0788e-43
(5Z,8Z,11Z,14Z,17Z)-eicosapentaenoylcarnitine	97.962	61.5942	1.35482e-33	6.06825e-31
sphingosine	41.3043	74.6377	4.74403e-13	9.40953e-11
sphingosine-1-phosphate	41.4402	74.6377	5.14916e-13	9.40953e-11
apoC-lys_btn	19.4293	50	6.27613e-13	9.40953e-11
carboxybiotin-carboxyl-carrier	19.4293	50	6.27613e-13	9.40953e-11
octadecenoylcarnitine(7)	99.1848	86.2319	1.47425e-11	1.8879e-09
SAM	41.9837	14.4928	1.30195e-10	1.46088e-08
beta-alanine	22.0109	2.89855	2.3841e-09	2.37736e-07
2,3-diketo-5-methylthiopentyl-1-phosphate	21.6033	2.89855	4.03885e-09	2.52319e-07
5-methylthioadenosine	21.6033	2.89855	4.03885e-09	2.52319e-07
S-adenosylmethioninamine	21.6033	2.89855	4.03885e-09	2.52319e-07
S-methyl-5-thio-D-ribulose-1-phosphate	21.6033	2.89855	4.03885e-09	2.52319e-07
methylthioribose-1p	21.6033	2.89855	4.03885e-09	2.52319e-07
1,2-dihydroxy-5-(methylthio)pent-1-en-3-one	21.4674	2.89855	4.20607e-09	2.52319e-07
3-amino-propanal	21.3315	2.89855	6.8e-09	3.82075e-07
spermidine	21.7391	3.62319	2.23506e-08	1.18456e-06
spermine	19.5652	3.62319	4.29359e-07	2.14262e-05
(8Z,11Z,14Z,17Z)-eicosatetraenoylcarnitine	99.5924	93.4783	6.95533e-06	0.000329318
PAPS	2.71739	12.3188	8.81759e-06	0.000360417
adenylyl sulfate	2.71739	12.3188	8.81759e-06	0.000360417
sulfate	2.71739	12.3188	8.81759e-06	0.000360417
PAP	2.58152	11.5942	1.81367e-05	0.000677996
cholesterol-sulfate	2.58152	11.5942	1.81367e-05	0.000677996
acyl-CoA-LD-SM pool	45.2446	64.4928	3.95393e-05	0.00142042
4-methylthio-2-oxobutanoic acid	30.163	14.4928	0.000110369	0.00381622
K+	13.3152	24.6377	0.00114575	0.0381491
chenodeoxycholoyl-CoA	0.951087	5.07246	0.00274459	0.0881211
L-glutamate 5-semialdehyde	41.712	28.2609	0.00319892	0.0991666
O2-	11.5489	3.62319	0.00337071	0.101009
dihydrolipoamide	2.58152	7.97101	0.00376624	0.105808
lipoamide	2.58152	7.97101	0.00376624	0.105808
chenodiol	1.08696	5.07246	0.0044736	0.121872
hydracrylate	5.70652	13.0435	0.00493281	0.127635
3-oxopropanoate	26.4946	15.2174	0.00496911	0.127635
S-succinyldihydrolipoamide	2.44565	7.24638	0.00712915	0.178031
3-hydroxypropionyl-CoA	6.52174	13.7681	0.00781181	0.184811
acrylyl-CoA	6.52174	13.7681	0.00781181	0.184811
1-pyrroline-5-carboxylate	40.0815	28.2609	0.00979237	0.225727
succinate semialdehyde	3.80435	0	0.0146145	0.32846
5-methyl-THF	20.788	12.3188	0.0193284	0.361458
SAH	20.788	12.3188	0.0193284	0.361458
homocysteine	20.788	12.3188	0.0193284	0.361458
24,25-dihydrolanosterol	14.9457	23.1884	0.0229178	0.361458
4,4-dimethyl-14alpha-formyl-5alpha-cholesta-8-en-3beta-ol	14.9457	23.1884	0.0229178	0.361458
4,4-dimethyl-14alpha-hydroxymethyl-5alpha-cholesta-8-en-3beta-ol	14.9457	23.1884	0.0229178	0.361458
4,4-dimethyl-5alpha-cholesta-8,14-dien-3-beta-ol	14.9457	23.1884	0.0229178	0.361458
4,4-dimethyl-5alpha-cholesta-8-en-3-beta-ol	14.9457	23.1884	0.0229178	0.361458
4alpha-carboxy-4beta-methyl-5alpha-cholesta-8-en-3beta-ol	14.9457	23.1884	0.0229178	0.361458
4alpha-carboxy-5alpha-cholesta-8-en-3beta-ol	14.9457	23.1884	0.0229178	0.361458
4alpha-formyl-4beta-methyl-5alpha-cholesta-8-en-3beta-ol	14.9457	23.1884	0.0229178	0.361458
4alpha-formyl-5alpha-cholesta-8-en-3beta-ol	14.9457	23.1884	0.0229178	0.361458
4alpha-hydroxymethyl-4beta-methyl-5alpha-cholesta-8-en-3beta-ol	14.9457	23.1884	0.0229178	0.361458
4alpha-hydroxymethyl-5alpha-cholesta-8-en-3beta-ol	14.9457	23.1884	0.0229178	0.361458
4alpha-methyl-5alpha-cholesta-8-en-3-one	14.9457	23.1884	0.0229178	0.361458
4alpha-methyl-cholesta-8-enol	14.9457	23.1884	0.0229178	0.361458
5alpha-cholesta-8-en-3-one	14.9457	23.1884	0.0229178	0.361458
cholestenol	15.2174	23.1884	0.0243905	0.364736
lathosterol	15.2174	23.1884	0.0243905	0.364736
provitamin D3	15.2174	23.1884	0.0243905	0.364736
1-phosphatidyl-1D-myo-inositol-5-phosphate	0.543478	2.89855	0.0248844	0.364736
sarcosine	20.5163	12.3188	0.0251542	0.364736
ribose-1-phosphate	30.8424	40.5797	0.0290618	0.413791
1-phosphatidyl-1D-myo-inositol-3,4-bisphosphate	0.271739	2.17391	0.0302141	0.413791
1-phosphatidyl-1D-myo-inositol-3-phosphate	0.271739	2.17391	0.0302141	0.413791
3-oxo-tetracosa-9,12,15,18-all-cis-tetraenoyl-CoA	43.6141	33.3333	0.0303784	0.413791
2-methylbutyryl-CoA	0.407609	2.17391	0.0535165	0.687305
2-oxo-3-methylvalerate	0.407609	2.17391	0.0535165	0.687305
phosphatidylinositol-3,4,5-trisphosphate	0.407609	2.17391	0.0535165	0.687305
tiglyl-CoA	0.407609	2.17391	0.0535165	0.687305
acetylcholine	0.13587	1.44928	0.0666063	0.813297
adenine	38.0435	29.7101	0.0676726	0.813297
3(S)-hydroxy-docosa-13,16,19-all-cis-trienoyl-CoA	76.3587	68.8406	0.0679281	0.813297
3-oxo-docosa-13,16,19-all-cis-trienoyl-CoA	76.3587	68.8406	0.0679281	0.813297
trans,cis,cis,cis-2,13,16,19-docosatetraenoyl-CoA	76.3587	68.8406	0.0679281	0.813297
4-aminobutyrate	3.80435	0.724638	0.0696595	0.813297
putrescine	3.80435	0.724638	0.0696595	0.813297
inositol-1-phosphate	26.9022	19.5652	0.0721491	0.824922
ribulose-5-phosphate	98.6413	96.3768	0.0724904	0.824922
xanthine	5.29891	9.42029	0.0754303	0.847648
alpha-D-galactose-1-phosphate	0.951087	2.89855	0.079965	0.887512
3-carboxy-1-hydroxypropyl-ThPP	0.543478	2.17391	0.0830338	0.892711
thiamin-PP	0.543478	2.17391	0.0830338	0.892711
1D-myo-inositol-1,3,4,5-tetrakisphosphate	4.34783	7.97101	0.0844054	0.892711
1D-myo-inositol-1,3,4-trisphosphate	4.34783	7.97101	0.0844054	0.892711
(R)-methylmalonyl-CoA	52.038	44.2029	0.0955595	0.987449
methylmalonyl-CoA	52.038	44.2029	0.0955595	0.987449
4-aminobutanal	3.53261	0.724638	0.104864	1
fatty acid-LD-PI pool	14.6739	9.42029	0.108184	1
1,2-diacylglycerol-LD-PI pool	14.9457	9.42029	0.108443	1
1-acylglycerol-LD-PI pool	14.9457	9.42029	0.108443	1
(2E)-tetradecenoyl-CoA	91.4402	86.9565	0.108795	1
(S)-3-hydroxytetradecanoyl-CoA	91.4402	86.9565	0.108795	1
3-oxotetradecanoyl-CoA	91.4402	86.9565	0.108795	1
UDP-galactose	1.90217	4.34783	0.111069	1
glutamyl-5-phosphate	26.9022	20.2899	0.112514	1
mitooxidized thioredoxin	0.679348	2.17391	0.117923	1
mitothioredoxin	0.679348	2.17391	0.117923	1
phosphatidylinositol-4,5-bisphosphate	7.47283	11.5942	0.124594	1
1D-myo-inositol-3,4-bisphosphate	4.21196	7.24638	0.126194	1
2-phospho-D-glycerate	38.587	45.6522	0.129594	1
D-galactosyl-N-acylsphingosine	1.22283	2.89855	0.134765	1
thymidine	1.22283	2.89855	0.134765	1
glycolate	4.75543	7.97101	0.143003	1
glutathionyl-leukotriene C4	0.815217	2.17391	0.157191	1
(4Z,7Z,10Z,13Z,16Z)-docosapentaenoylcarnitine	100	99.2754	0.157895	1
(6Z,9Z,12Z,15Z)-octadecatetraenoylcarnitine	100	99.2754	0.157895	1
(7Z,10Z,13Z,16Z,19Z)-docosapentaenoylcarnitine	100	99.2754	0.157895	1
gamma-linolenoylcarnitine	100	99.2754	0.157895	1
ocosatetraenoylcarnitine	100	99.2754	0.157895	1
stearoylcarnitine	100	99.2754	0.157895	1
(2E)-nonadecenoyl-CoA	51.9022	58.6957	0.16326	1
3-hydroxynonadecanoyl-CoA	51.9022	58.6957	0.16326	1
3-oxononadecanoyl-CoA	51.9022	58.6957	0.16326	1
L-2-amino-3-oxobutanoic acid	16.3043	21.0145	0.176548	1
(S)-3-hydroxy-2-methylbutyryl-CoA	0.407609	1.44928	0.17911	1
2-methylacetoacetyl-CoA	0.407609	1.44928	0.17911	1
histamine	0.407609	1.44928	0.17911	1
reverse triiodthyronine	0.407609	1.44928	0.17911	1
dUDP	16.9837	21.7391	0.182743	1
sphingosylphosphorylcholine	10.462	14.4928	0.183145	1
1,2-diacylglycerol-LD-PE pool	49.7283	55.7971	0.195428	1
1-acylglycerol-LD-PE pool	49.7283	55.7971	0.195428	1
phosphatidate-LD-PE pool	49.7283	55.7971	0.195428	1
aminoacetone	15.8967	20.2899	0.212786	1
methylglyoxal	15.8967	20.2899	0.212786	1
GSH	90.625	86.9565	0.213758	1
hypoxanthine	7.20109	10.1449	0.225258	1
trans-3-decenoyl-CoA	47.8261	53.6232	0.228145	1
CDP-ethanolamine	97.2826	99.2754	0.228824	1
PE-PS-LD pool	97.2826	99.2754	0.228824	1
(2E)-heptenoyl-CoA	99.4565	98.5507	0.241906	1
(2E)-nonenoyl-CoA	99.4565	98.5507	0.241906	1
(2E)-pentenoyl-CoA	99.4565	98.5507	0.241906	1
(2E)-tridecenoyl-CoA	99.4565	98.5507	0.241906	1
(2E)-undecenoyl-CoA	99.4565	98.5507	0.241906	1
3-hydroxyheptanoyl-CoA	99.4565	98.5507	0.241906	1
3-hydroxynonanoyl-CoA	99.4565	98.5507	0.241906	1
3-hydroxypentanoyl-CoA	99.4565	98.5507	0.241906	1
3-hydroxytridecanoyl-CoA	99.4565	98.5507	0.241906	1
3-hydroxyundecanoyl-CoA	99.4565	98.5507	0.241906	1
3-oxoheptanoyl-CoA	99.4565	98.5507	0.241906	1
3-oxononanoyl-CoA	99.4565	98.5507	0.241906	1
3-oxopentanoyl-CoA	99.4565	98.5507	0.241906	1
3-oxotridecanoyl-CoA	99.4565	98.5507	0.241906	1
3-oxoundecanoyl-CoA	99.4565	98.5507	0.241906	1
choloyl-CoA	0.543478	1.44928	0.241906	1
deoxyinosine	0.543478	1.44928	0.241906	1
heptanoyl-CoA	99.4565	98.5507	0.241906	1
leukotriene B4	0.543478	1.44928	0.241906	1
nonanoyl-CoA	99.4565	98.5507	0.241906	1
pentanoyl-CoA	99.4565	98.5507	0.241906	1
prostaglandin E2	0.543478	1.44928	0.241906	1
undecanoyl-CoA	99.4565	98.5507	0.241906	1
3(S)-hydroxy-tetracosa-12,15,18,21-all-cis-tetraenoyl-CoA	78.5326	73.913	0.263969	1
L-octanoylcarnitine	55.9783	50.7246	0.264195	1
(3S)-3-hydroxy-cis,cis-palmito-7,10-dienoyl-CoA	47.6902	52.8986	0.266981	1
(3S)-3-hydroxydodec-cis-6-enoyl-CoA	47.6902	52.8986	0.266981	1
2-trans-4-cis-decadienoyl-CoA	47.6902	52.8986	0.266981	1
3(S)-hydroxy-(5Z,8Z)-tetradecadienoyl-CoA	47.6902	52.8986	0.266981	1
3-oxo-cis,cis-5,8-tetradecadienoyl-CoA	47.6902	52.8986	0.266981	1
3-oxo-cis,cis-7,10-hexadecadienoyl-CoA	47.6902	52.8986	0.266981	1
3-oxolaur-6-cis-enoyl-CoA	47.6902	52.8986	0.266981	1
4-cis-decenoyl-CoA	47.6902	52.8986	0.266981	1
cis,cis-3,6-dodecadienoyl-CoA	47.6902	52.8986	0.266981	1
cis,cis-myristo-5,8-dienoyl-CoA	47.6902	52.8986	0.266981	1
trans,cis,cis-2,7,10-hexadecatrienoyl-CoA	47.6902	52.8986	0.266981	1
trans,cis-lauro-2,6-dienoyl-CoA	47.6902	52.8986	0.266981	1
trans-2-cis,cis-5,8-tetradecatrienoyl-CoA	47.6902	52.8986	0.266981	1
fatty acid-LD-SM pool	82.2011	86.2319	0.270529	1
4-hydroxy-2-oxoglutarate	24.1848	19.5652	0.273994	1
GSSG	89.9457	86.9565	0.291525	1
oxalosuccinate	4.8913	7.24638	0.295988	1
D-myo-inositol-1,4,5-trisphosphate	7.33696	10.1449	0.296941	1
2-deoxy-D-ribose-5-phosphate	1.63043	2.89855	0.299275	1
(3S)-hydroxy-docasa-cis,cis-13,16-dienoyl-CoA	80.163	76.087	0.300751	1
3-oxodocasa-cis,cis-13,16-dienoyl-CoA	80.163	76.087	0.300751	1
trans,cis,cis-2,13,16-docasatrienoyl-CoA	80.163	76.087	0.300751	1
(3S)-hydroxy-eicosa-cis,cis-11,14-dienoyl-CoA	7.47283	10.1449	0.301359	1
3-oxoeicosa-cis,cis-11,14-dienoyl-CoA	7.47283	10.1449	0.301359	1
trans,cis,cis-2,11,14-eicosatrienoyl-CoA	7.47283	10.1449	0.301359	1
alloxan	0.679348	1.44928	0.305455	1
chloride	0.679348	1.44928	0.305455	1
glucosylceramide pool	0.679348	1.44928	0.305455	1
urea	0.679348	1.44928	0.305455	1
(4Z,7Z,10Z)-hexadecatrienoyl-CoA	45.788	50.7246	0.306899	1
3-oxo-(6Z,9Z,12Z)-octadecatrienoyl-CoA	45.788	50.7246	0.306899	1
3-oxo-tetracosa-12,15,18,21-all-cis-tetraenoyl-CoA	49.0489	44.2029	0.308424	1
homoserine	1.7663	2.89855	0.32676	1
1,2-diacylglycerol-LD-PS pool	97.5543	99.2754	0.338224	1
phosphatidate-LD-PS pool	97.5543	99.2754	0.338224	1
glycerate	62.6359	57.971	0.339521	1
3-hydroxy-THA-CoA	43.8859	39.1304	0.349028	1
3-keto-THA-CoA	43.8859	39.1304	0.349028	1
delta2-THA-CoA	43.8859	39.1304	0.349028	1
(2E,4Z,7Z,10Z)-hexadecatetraenoyl-CoA	45.5163	50	0.352858	1
(2E,6Z,9Z,12Z)-octadecatetraenoyl-CoA	45.5163	50	0.352858	1
(3Z,7Z,10Z)-hexadecatrienoyl-CoA	45.5163	50	0.352858	1
3(S)-hydroxy-(6Z,9Z,12Z)-octadecatrienoyl-CoA	45.5163	50	0.352858	1
3(S)-hydroxy-tetracosa-6,9,12,15,18-all-cis-pentaenoyl-CoA	54.3478	50	0.353862	1
3-oxo-all-cis-6,9,12,15,18-tetracosapentaenoyl-CoA	54.3478	50	0.353862	1
trans-2-all-cis-6,9,12,15,18-tetracosahexaenoyl-CoA	54.3478	50	0.353862	1
L-1-pyrroline-3-hydroxy-5-carboxylate	71.0598	75.3623	0.353866	1
trans-4-hydroxy-L-proline	71.0598	75.3623	0.353866	1
PEP	20.9239	24.6377	0.366232	1
acetate	30.163	34.058	0.367095	1
2-oxobutyrate	0.815217	1.44928	0.367965	1
deoxyuridine	0.815217	1.44928	0.367965	1
uracil	0.815217	1.44928	0.367965	1
urate	0.815217	1.44928	0.367965	1
L-erythro-4-hydroxyglutamate	24.1848	20.2899	0.381918	1
(5Z,8Z,11Z)-eicosatrienoylcarnitine	98.913	97.8261	0.393967	1
N-acetylglucosamine-6-phosphate	1.08696	2.17391	0.393967	1
glucosamine-6-phosphate	1.08696	2.17391	0.393967	1
cholate	0.271739	0.724638	0.403213	1
glycoursodeoxycholate	0.271739	0.724638	0.403213	1
sulfotaurolithocholate	0.271739	0.724638	0.403213	1
dADP	18.6141	21.7391	0.409116	1
IDP	1.22283	2.17391	0.416436	1
ITP	1.22283	2.17391	0.416436	1
inosine	1.22283	2.17391	0.416436	1
erythrose-4-phosphate	6.65761	4.34783	0.443167	1
galactose	1.3587	2.17391	0.443256	1
(2E)-heneicosenoyl-CoA	50.8152	54.3478	0.459192	1
3-hydroxyheneicosanoyl-CoA	50.8152	54.3478	0.459192	1
3-oxoheneicosanoyl-CoA	50.8152	54.3478	0.459192	1
beta-D-glucose	1.49457	2.17391	0.473107	1
sn-glycerol-3-PE	31.3859	28.2609	0.48427	1
acetyl adenylate	2.03804	0.724638	0.490084	1
dehydroepiandrosterone sulfate	0.407609	0.724638	0.497767	1
digalactosylceramide	0.407609	0.724638	0.497767	1
3(S)-hydroxy-13-cis-eicosenoyl-CoA	78.6685	76.087	0.500942	1
3-oxo-13-cis-eicosenoyl-CoA	78.6685	76.087	0.500942	1
trans,cis-2,13-eicosadienoyl-CoA	78.6685	76.087	0.500942	1
O-acetylcarnitine	24.1848	26.8116	0.518954	1
2-deoxy-D-ribose-1-phosphate	15.0815	17.3913	0.520879	1
(2E)-octadecenoyl-CoA	97.8261	97.1014	0.540356	1
3-hydroxyoctadecanoyl-CoA	97.8261	97.1014	0.540356	1
3-oxooctadecanoyl-CoA	97.8261	97.1014	0.540356	1
2-trans-9,12,15,18,21-all-cis-tetracosahexaenoyl-CoA	57.0652	54.3478	0.575137	1
3(S)-hydroxy-tetracosa-9,12,15,18,21-all-cis-pentaenoyl-CoA	57.0652	54.3478	0.575137	1
3-oxo-tetracosa-9,12,15,18,21-all-cis-pentaenoyl-CoA	57.0652	54.3478	0.575137	1
2-trans-7,10,13,16,19-all-cis-docosahexaenoyl-CoA	77.7174	75.3623	0.579582	1
3(S)-hydroxy-docosa-7,10,13,16,19-all-cis-pentaenoyl-CoA	77.7174	75.3623	0.579582	1
3-oxo-docosa-7,10,13,16,19-all-cis-pentaenoyl-CoA	77.7174	75.3623	0.579582	1
10,13,16,19-docosatetraenoylcarnitine	96.6033	97.8261	0.602911	1
nicotinamide ribonucleoside	7.6087	8.69565	0.607341	1
14-demethyllanosterol	3.39674	4.34783	0.614109	1
4,4-dimethyl-14alpha-formyl-5alpha-cholesta-8,24-dien-3beta-ol	3.39674	4.34783	0.614109	1
4,4-dimethyl-14alpha-hydroxymethyl-5alpha-cholesta-8,24-dien-3beta-ol	3.39674	4.34783	0.614109	1
4,4-dimethyl-5alpha-cholesta-8,14,24-trien-3beta-ol	3.39674	4.34783	0.614109	1
4alpha-carboxy-4beta-methyl-5alpha-cholesta-8,24-dien-3beta-ol	3.39674	4.34783	0.614109	1
4alpha-carboxy-5alpha-cholesta-8,24-dien-3beta-ol	3.39674	4.34783	0.614109	1
4alpha-formyl-4beta-methyl-5alpha-cholesta-8,24-dien-3beta-ol	3.39674	4.34783	0.614109	1
4alpha-formyl-5alpha-cholesta-8,24-dien-3beta-ol	3.39674	4.34783	0.614109	1
4alpha-hydroxymethyl-4beta-methyl-5alpha-cholesta-8,24-dien-3beta-ol	3.39674	4.34783	0.614109	1
4alpha-hydroxymethyl-5alpha-cholesta-8,24-dien-3beta-ol	3.39674	4.34783	0.614109	1
4alpha-methylzymosterol	3.39674	4.34783	0.614109	1
5alpha-cholesta-8,24-dien-3-one	3.39674	4.34783	0.614109	1
zymosterol	3.39674	4.34783	0.614109	1
1-acyl-PE pool	31.6576	28.9855	0.616853	1
(S)-3-hydroxy-11-cis-octadecenoyl-CoA	36.5489	34.058	0.629638	1
3-oxo-11-cis-octadecenoyl-CoA	36.5489	34.058	0.629638	1
fatty acid-LD-TG1 pool	63.4511	65.942	0.629638	1
trans,cis-octadeca-2,11-dienoyl-CoA	36.5489	34.058	0.629638	1
fatty acid-LD-TG2 pool	61.1413	58.6957	0.634979	1
1-acylglycerol-LD-TG1 pool	61.0054	58.6957	0.635479	1
ornithine	4.21196	2.89855	0.637104	1
dCDP	10.462	11.5942	0.654079	1
(2E)-heptadecenoyl-[ACP]	1.08696	1.44928	0.662882	1
(2E)-heptenoyl-[ACP]	1.08696	1.44928	0.662882	1
(2E)-nonenoyl-[ACP]	1.08696	1.44928	0.662882	1
(2E)-pentadecenoyl-[ACP]	1.08696	1.44928	0.662882	1
(2E)-pentenoyl-[ACP]	1.08696	1.44928	0.662882	1
(2E)-tridecenoyl-[ACP]	1.08696	1.44928	0.662882	1
(2E)-undecenoyl-[ACP]	1.08696	1.44928	0.662882	1
3-hydroxyheptadecanoyl-[ACP]	1.08696	1.44928	0.662882	1
3-hydroxyheptanoyl-[ACP]	1.08696	1.44928	0.662882	1
3-hydroxynonanoyl-[ACP]	1.08696	1.44928	0.662882	1
3-hydroxypentadecanoyl-[ACP]	1.08696	1.44928	0.662882	1
3-hydroxypentanoyl-[ACP]	1.08696	1.44928	0.662882	1
3-hydroxytridecanoyl-[ACP]	1.08696	1.44928	0.662882	1
3-hydroxyundecanoyl-[ACP]	1.08696	1.44928	0.662882	1
3-oxoheptadecanoyl-[ACP]	1.08696	1.44928	0.662882	1
3-oxoheptanoyl-[ACP]	1.08696	1.44928	0.662882	1
3-oxononanoyl-[ACP]	1.08696	1.44928	0.662882	1
3-oxopentadecanoyl-[ACP]	1.08696	1.44928	0.662882	1
3-oxopentanoyl-[ACP]	1.08696	1.44928	0.662882	1
3-oxotridecanoyl-[ACP]	1.08696	1.44928	0.662882	1
heptadecanoyl-[ACP]	1.08696	1.44928	0.662882	1
heptanoyl-[ACP]	1.08696	1.44928	0.662882	1
nonanoyl-[ACP]	1.08696	1.44928	0.662882	1
pentadecanoyl-[ACP]	1.08696	1.44928	0.662882	1
pentanoyl-[ACP]	1.08696	1.44928	0.662882	1
propanoyl-[ACP]	1.08696	1.44928	0.662882	1
tridecanoyl-[ACP]	1.08696	1.44928	0.662882	1
undecanoyl-[ACP]	1.08696	1.44928	0.662882	1
O-propanoylcarnitine	95.1087	94.2029	0.670768	1
glyoxalate	28.6685	26.8116	0.682194	1
2-oxoglutaramate	1.22283	1.44928	0.68797	1
sedoheptulose-7-phosphate	13.8587	15.2174	0.689201	1
3-phospho-D-glycerate	98.5054	99.2754	0.702795	1
1-acylglycerol-3P-LD-PS pool	39.538	41.3043	0.705512	1
acyl-CoA-LD-PS pool	39.538	41.3043	0.705512	1
(2E)-tetracosenoyl-CoA	83.9674	82.6087	0.706235	1
3-hydroxytetracosanoyl-CoA	83.9674	82.6087	0.706235	1
3-oxotetracosanoyl-CoA	83.9674	82.6087	0.706235	1
tetradecenoylcarnitine(9)	98.2337	99.2754	0.709385	1
3(S)-hydroxy-docosa-10,13,16,19-all-cis-tetraenoyl-CoA	44.5652	46.3768	0.709849	1
3-oxo-docosa-10,13,16,19-all-cis-tetraenoyl-CoA	44.5652	46.3768	0.709849	1
trans,cis,cis,cis,cis-2,10,13,16,19-docosapentaenoyl-CoA	44.5652	46.3768	0.709849	1
3(S)-hydroxy-10,13,16-all-cis-docosatrienoyl-CoA	51.4946	53.6232	0.710523	1
3-oxo-docosa-cis,cis,cis-10,13,16-trienoyl-CoA	51.4946	53.6232	0.710523	1
trans,cis,cis,cis-2,10,13,16-docosatetraenoyl-CoA	51.4946	53.6232	0.710523	1
trans,cis,cis,cis,cis-2,12,15,18,21-tetracosapentaenoyl-CoA	48.2337	50	0.711487	1
1-acylglycerol-LD-PS pool	16.9837	18.1159	0.713812	1
fatty acid-LD-PS pool	16.9837	18.1159	0.713812	1
beta-D-glucose-6-phosphate	1.63043	2.17391	0.717703	1
(11Z,14Z,17Z)-eicosatrienoylcarnitine	98.2337	97.8261	0.728454	1
tetradecenoylcarnitine(7)	98.0978	97.8261	0.741029	1
nicotinamide	25.6793	23.913	0.749316	1
nicotinamide D-ribonucleotide	25.6793	23.913	0.749316	1
3(S)-hydroxy-9-cis-eicosenoyl-CoA	68.75	67.3913	0.764908	1
3-oxo-9-cis-eicosenoyl-CoA	68.75	67.3913	0.764908	1
trans,cis-2,9-eicosadienoyl-CoA	68.75	67.3913	0.764908	1
5alpha-cholesta-7,24-dien-3beta-ol	2.58152	2.89855	0.773618	1
7-dehydrodesmosterol	2.58152	2.89855	0.773618	1
hexadecanal	39.9457	41.3043	0.7771	1
hexadecenal	39.9457	41.3043	0.7771	1
sphinganine-1-phosphate	39.9457	41.3043	0.7771	1
eicosadienoylcarnitine	97.2826	97.1014	0.78232	1
(2E)-hexacosenoyl-CoA	87.0924	86.2319	0.783317	1
3-hydroxyhexacosanoyl-CoA	87.0924	86.2319	0.783317	1
3-oxohexacosanoyl-CoA	87.0924	86.2319	0.783317	1
fructose-1,6-bisphosphate	2.98913	2.17391	0.783921	1
dAMP	13.7228	14.4928	0.789075	1
deoxyadenosine	13.7228	14.4928	0.789075	1
6-phospho-D-gluconate	4.4837	3.62319	0.82111	1
glucono-1,5-lactone-6-phosphate	4.4837	3.62319	0.82111	1
3(S)-hydroxy-dihomo-gamma-linolenoyl-CoA	75	76.087	0.830634	1
3-oxo-dihomo-gamma-linolenoyl-CoA	75	76.087	0.830634	1
trans-2-cis,cis,cis-8,11,14-eicosatetraenoyl-CoA	75	76.087	0.830634	1
1,2-diacylglycerol-LD-SM pool	31.6576	30.4348	0.84184	1
1-acylglycerol-3P-LD-SM pool	31.6576	30.4348	0.84184	1
1-acylglycerol-LD-SM pool	31.6576	30.4348	0.84184	1
phosphatidate-LD-SM pool	31.6576	30.4348	0.84184	1
3(S)-hydroxy-3-oxo-eicosadienoyl-CoA	61.1413	60.1449	0.849422	1
3-oxo-eicosadienoyl-CoA	61.1413	60.1449	0.849422	1
trans,cis-2,8,11-eicosatrienoyl-CoA	61.1413	60.1449	0.849422	1
3(S)-hydroxy-11-cis-docosenoyl-CoA	42.2554	43.4783	0.851188	1
3-oxo-11cis-docosenoyl-CoA	42.2554	43.4783	0.851188	1
trans,cis-2,11-docosadienoyl-CoA	42.2554	43.4783	0.851188	1
2-trans-9,12,15,18-all-cis-tetracosapentaenoyl-CoA	47.4185	48.5507	0.852779	1
acetaldehyde	11.1413	10.1449	0.882021	1
1-acylglycerol-LD-PC pool	14.8098	13.7681	0.895579	1
1D-myo-inositol-3-phosphate	14.6739	15.2174	0.895967	1
adenosine	27.7174	26.8116	0.917371	1
2-trans-cis,cis,cis,cis-4,8,11,14-eicosapentaenoyl-CoA	44.1576	44.9275	0.925641	1
trans-3-cis-8,11,14-eicosatetraenoyl-CoA	44.1576	44.9275	0.925641	1
(2E,7Z,10Z,13Z,16Z)-docosapentaenoyl-CoA	50	50.7246	0.926155	1
3(S)-hydroxy-docosa-7,10,13,16-all-cis-tetraenoyl-CoA	50	50.7246	0.926155	1
3-oxo-docosa-7,10,13,16-all-cis-tetraenoyl-CoA	50	50.7246	0.926155	1
(10Z)-heptadecenoic acid	1	1	1	1
(10Z)-heptadecenoyl-CoA	1	1	1	1
(11Z)-docosenoyl-CoA	1	1	1	1
(11Z)-eicosenoyl-CoA	1	1	1	1
(11Z,14Z)-eicosadienoic acid	1	1	1	1
(11Z,14Z)-eicosadienoyl-CoA	1	1	1	1
(11Z,14Z,17Z)-eicosatrienoic acid	1	1	1	1
(11Z,14Z,17Z)-eicosatrienoyl-CoA	1	1	1	1
(13Z)-docosenoyl-CoA	1	1	1	1
(13Z)-eicosenoic acid	1	1	1	1
(13Z)-eicosenoyl-CoA	1	1	1	1
(13Z)-octadecenoic acid	1	1	1	1
(13Z)-octadecenoyl-CoA	1	1	1	1
(13Z,16Z)-docosadienoic acid	1	1	1	1
(13Z,16Z)-docosadienoyl-CoA	1	1	1	1
(13Z,16Z)-docosadienoylcarnitine	98.2337	98.5507	1	1
(15Z)-tetracosenoyl-CoA	1	1	1	1
(15Z)-tetracosenoylcarnitine	96.4674	97.1014	1	1
(2E)-decenoyl-CoA	1	1	1	1
(2E)-docosenoyl-CoA	1	1	1	1
(2E)-dodecenoyl-CoA	1	1	1	1
(2E)-eicosenoyl-CoA	90.4891	90.5797	1	1
(2E)-heptadecenoyl-CoA	13.587	13.0435	1	1
(2E)-hexadecenoyl-CoA	80.9783	81.1594	1	1
(2E)-hexenoyl-CoA	1	1	1	1
(2E)-octenoyl-CoA	1	1	1	1
(2E)-pentadecenoyl-CoA	1	1	1	1
(2E)-tricosenoyl-CoA	33.0163	32.6087	1	1
(3S)-hydroxy-eicosa-cis,cis,cis-11,14,17-trienoyl-CoA	2.71739	2.17391	1	1
(3Z)-dodecenoyl-CoA	1	1	1	1
(4Z,7Z,10Z,13Z,16Z)-DPA	1	1	1	1
(4Z,7Z,10Z,13Z,16Z)-docosapentaenoyl-CoA	1	1	1	1
(4Z,7Z,10Z,13Z,16Z,19Z)-docosahexaenoyl-CoA	1	1	1	1
(5Z)-dodecenoyl-CoA	1	1	1	1
(5Z,8Z,11Z)-eicosatrienoyl-CoA	1	1	1	1
(6Z,9Z)-octadecadienoic acid	1	1	1	1
(6Z,9Z)-octadecadienoyl-CoA	1	1	1	1
(6Z,9Z)-octadecadienoylcarnitine	96.6033	97.1014	1	1
(6Z,9Z,12Z,15Z)-octadecatetraenoyl-CoA	1	1	1	1
(6Z,9Z,12Z,15Z,18Z)-TPA	1	1	1	1
(6Z,9Z,12Z,15Z,18Z)-tetracosapentaenoyl-CoA	1	1	1	1
(6Z,9Z,12Z,15Z,18Z)-tetracosapentaenoylcarnitine	96.4674	97.1014	1	1
(6Z,9Z,12Z,15Z,18Z,21Z)-THA	1	1	1	1
(6Z,9Z,12Z,15Z,18Z,21Z)-tetracosahexaenoyl-CoA	1	1	1	1
(6Z,9Z,12Z,15Z,18Z,21Z)-tetracosahexaenoylcarnitine	96.4674	97.1014	1	1
(7Z)-octadecenoic acid	1	1	1	1
(7Z)-octadecenoyl-CoA	1	1	1	1
(7Z)-tetradecenoic acid	1	1	1	1
(7Z)-tetradecenoyl-CoA	1	1	1	1
(7Z,10Z,13Z,16Z)-docosatetraenoyl-CoA	1	1	1	1
(7Z,10Z,13Z,16Z,19Z)-docosapentaenoyl-CoA	1	1	1	1
(8Z,11Z)-eicosadienoyl-CoA	1	1	1	1
(8Z,11Z)-eicosadienoylcarnitine	96.7391	97.1014	1	1
(8Z,11Z,14Z,17Z)-eicosatetraenoyl-CoA	1	1	1	1
(9E)-octadecenoyl-CoA	1	1	1	1
(9E)-octadecenoylcarnitine	97.2826	97.8261	1	1
(9E)-tetradecenoic acid	1	1	1	1
(9E)-tetradecenoyl-CoA	1	1	1	1
(9Z,12Z,15Z,18Z)-TTA	1	1	1	1
(9Z,12Z,15Z,18Z)-tetracosatetraenoyl-CoA	1	1	1	1
(9Z,12Z,15Z,18Z)-tetracosatetraenoylcarnitine	96.4674	97.1014	1	1
(9Z,12Z,15Z,18Z,21Z)-TPA	1	1	1	1
(9Z,12Z,15Z,18Z,21Z)-tetracosapentaenoyl-CoA	1	1	1	1
(9Z,12Z,15Z,18Z,21Z)-tetracosapentaenoylcarnitine	96.4674	97.1014	1	1
(R)-5-diphosphomevalonate	1	1	1	1
(R)-5-phosphomevalonate	1	1	1	1
(R)-mevalonate	1	1	1	1
(S)-3-hydroxy-7-hexadecenoyl-CoA	1	1	1	1
(S)-3-hydroxybutyryl-CoA	1	1	1	1
(S)-3-hydroxydodecanoyl-CoA	1	1	1	1
(S)-3-hydroxyhexadecanoyl-CoA	80.9783	81.1594	1	1
(S)-3-hydroxyoleyleoyl-CoA	1	1	1	1
(S)-3-hydroxypalmitoleoyl-CoA	1	1	1	1
(S)-dihydroorotate	1	1	1	1
(S)-hydroxydecanoyl-CoA	1	1	1	1
(S)-hydroxyhexanoyl-CoA	1	1	1	1
(S)-hydroxyoctanoyl-CoA	1	1	1	1
1,2-diacylglycerol-LD-PC pool	1	1	1	1
1,2-diacylglycerol-LD-TAG pool	1	1	1	1
1,3-bisphospho-D-glycerate	96.1957	96.3768	1	1
1-acylglycerol-3P-10,13,16,19-doco	1	1	1	1
1-acylglycerol-3P-10,13,16-docosa	1	1	1	1
1-acylglycerol-3P-10-heptade	1	1	1	1
1-acylglycerol-3P-11,14,17-eico	1	1	1	1
1-acylglycerol-3P-11,14-eicosa	1	1	1	1
1-acylglycerol-3P-11-docose	1	1	1	1
1-acylglycerol-3P-11-eico	1	1	1	1
1-acylglycerol-3P-12,15,18,21-tetra	1	1	1	1
1-acylglycerol-3P-13,16,19-doco	1	1	1	1
1-acylglycerol-3P-13,16-docosa	1	1	1	1
1-acylglycerol-3P-13-docose	1	1	1	1
1-acylglycerol-3P-13-eicose	1	1	1	1
1-acylglycerol-3P-13-octade	1	1	1	1
1-acylglycerol-3P-15-tetra	1	1	1	1
1-acylglycerol-3P-4,7,10,13,16,19-doco	1	1	1	1
1-acylglycerol-3P-4,7,10,13,16-docosa	1	1	1	1
1-acylglycerol-3P-5,8,11,14,17-eico	1	1	1	1
1-acylglycerol-3P-5,8,11-eico	1	1	1	1
1-acylglycerol-3P-5-tetrade	1	1	1	1
1-acylglycerol-3P-6,9,12,15,18,21-tetra	1	1	1	1
1-acylglycerol-3P-6,9,12,15,18-tetraco	1	1	1	1
1-acylglycerol-3P-6,9,12,15-octa	1	1	1	1
1-acylglycerol-3P-6,9-octa	1	1	1	1
1-acylglycerol-3P-7,10,13,16,19-docosa	1	1	1	1
1-acylglycerol-3P-7,10,13,16-docosa	1	1	1	1
1-acylglycerol-3P-7-hexade	1	1	1	1
1-acylglycerol-3P-7-octade	1	1	1	1
1-acylglycerol-3P-7-tetrade	1	1	1	1
1-acylglycerol-3P-8,11,14,17-eico	1	1	1	1
1-acylglycerol-3P-8,11-eico	1	1	1	1
1-acylglycerol-3P-9,12,15,18,21-tetra	1	1	1	1
1-acylglycerol-3P-9,12,15,18-tetraco	1	1	1	1
1-acylglycerol-3P-9-eicose	1	1	1	1
1-acylglycerol-3P-9-heptade	1	1	1	1
1-acylglycerol-3P-9-octade	1	1	1	1
1-acylglycerol-3P-9-tetrade	1	1	1	1
1-acylglycerol-3P-CL pool	1	1	1	1
1-acylglycerol-3P-LD-PC pool	1	1	1	1
1-acylglycerol-3P-LD-PE pool	28.8043	28.9855	1	1
1-acylglycerol-3P-LD-PI pool	1	1	1	1
1-acylglycerol-3P-LD-TG1 pool	1	1	1	1
1-acylglycerol-3P-arach	1	1	1	1
1-acylglycerol-3P-cis-vac	1	1	1	1
1-acylglycerol-3P-dihomo-gamma	1	1	1	1
1-acylglycerol-3P-docosa	1	1	1	1
1-acylglycerol-3P-eico	1	1	1	1
1-acylglycerol-3P-gamma-lin	1	1	1	1
1-acylglycerol-3P-heneico	1	1	1	1
1-acylglycerol-3P-heptade	1	1	1	1
1-acylglycerol-3P-hexacosa	1	1	1	1
1-acylglycerol-3P-hexecose	1	1	1	1
1-acylglycerol-3P-laur	1	1	1	1
1-acylglycerol-3P-lin	1	1	1	1
1-acylglycerol-3P-linolen	1	1	1	1
1-acylglycerol-3P-myrist	1	1	1	1
1-acylglycerol-3P-nanode	1	1	1	1
1-acylglycerol-3P-ol	1	1	1	1
1-acylglycerol-3P-palm	1	1	1	1
1-acylglycerol-3P-palmn	1	1	1	1
1-acylglycerol-3P-pentade	1	1	1	1
1-acylglycerol-3P-stea	1	1	1	1
1-acylglycerol-3P-tetraco	1	1	1	1
1-acylglycerol-3P-trico	1	1	1	1
1-acylglycerol-3P-tridec	1	1	1	1
1-phosphatidyl-1D-myo-inositol-4-phosphate	3.66848	3.62319	1	1
10,13,16,19-docosatetraenoic acid	1	1	1	1
10,13,16,19-docosatetraenoyl-CoA	1	1	1	1
10,13,16-docosatrienoyl-CoA	1	1	1	1
10,13,16-docosatrienoylcarnitine	97.8261	97.8261	1	1
10,13,16-docosatriynoic acid	1	1	1	1
10-formyl-THF	1	1	1	1
12,15,18,21-tetracosatetraenoic acid	1	1	1	1
12,15,18,21-tetracosatetraenoyl-CoA	1	1	1	1
12,15,18,21-tetracosatetraenoylcarnitine	96.4674	97.1014	1	1
13,16,19-docosatrienoic acid	1	1	1	1
13,16,19-docosatrienoyl-CoA	1	1	1	1
13,16,19-docosatrienoylcarnitine	97.5543	97.8261	1	1
1D-myo-inositol-1,4-bisphosphate	5.57065	5.07246	1	1
1D-myo-inositol-4-phosphate	5.16304	5.07246	1	1
2-lysolecithin pool	1	1	1	1
3(S)-hydroxy-11-cis-eicosenoyl-CoA	1	1	1	1
3(S)-hydroxy-13-cis-docosenoyl-CoA	1	1	1	1
3(S)-hydroxy-all-cis-8,11,14,17-eicosatetraenoyl-CoA	1	1	1	1
3(S)-hydroxy-cis-15-tetracosaenoyl-CoA	1	1	1	1
3(S)-hydroxy-hexacosenoyl-CoA	1	1	1	1
3-dehydrosphinganine	1	1	1	1
3-hydroxydocosanoyl-CoA	1	1	1	1
3-hydroxyeicosanoyl-CoA	90.4891	90.5797	1	1
3-hydroxyheptadecanoyl-CoA	13.587	13.0435	1	1
3-hydroxypentadecanoyl-CoA	1	1	1	1
3-hydroxytricosanoyl-CoA	33.0163	32.6087	1	1
3-keto-eicosa-8,11,14,17-all-cis-tetraenoyl-CoA	1	1	1	1
3-oxo-11-cis-eicosenoyl-CoA	1	1	1	1
3-oxo-13cis-docosenoyl-CoA	1	1	1	1
3-oxo-7-hexadecenoyl-CoA	1	1	1	1
3-oxo-cis-15-tetracosaenoyl-CoA	1	1	1	1
3-oxo-hexacosenoyl-CoA	1	1	1	1
3-oxodecanoyl-CoA	1	1	1	1
3-oxodocosanoyl-CoA	1	1	1	1
3-oxododecanoyl-CoA	1	1	1	1
3-oxoeicosa-cis,cis,cis-11,14,17-trienoyl-CoA	2.71739	2.17391	1	1
3-oxoeicosanoyl-CoA	90.4891	90.5797	1	1
3-oxoheptadecanoyl-CoA	13.587	13.0435	1	1
3-oxohexanoyl-CoA	1	1	1	1
3-oxomyrist-5-enoyl-CoA	1	1	1	1
3-oxomyrist-7-enoyl-CoA	1	1	1	1
3-oxooctanoyl-CoA	1	1	1	1
3-oxooleoyl-CoA	1	1	1	1
3-oxopalmitoleoyl-CoA	1	1	1	1
3-oxopalmitoyl-CoA	80.9783	81.1594	1	1
3-oxopentadecanoyl-CoA	1	1	1	1
3-oxotricosanoyl-CoA	33.0163	32.6087	1	1
5,10-methenyl-THF	99.8641	100	1	1
5,10-methylene-THF	1	1	1	1
5-phosphoribosyl-4-carboxy-5-aminoimidazole	1	1	1	1
5-phosphoribosylamine	1	1	1	1
5-phosphoribosylformylglycinamidine	1	1	1	1
5-tetradecenoyl-CoA	1	1	1	1
7-hexadecenoyl-CoA	1	1	1	1
7-palmitoleic acid	1	1	1	1
8,11-eicosadienoic acid	1	1	1	1
9-eicosenoic acid	1	1	1	1
9-eicosenoyl-CoA	1	1	1	1
9-heptadecenoyl-CoA	1	1	1	1
9-heptadecylenic acid	1	1	1	1
ADP	1	1	1	1
AICAR	1	1	1	1
AIR	1	1	1	1
AKG	1	1	1	1
AMP	1	1	1	1
ATP	1	1	1	1
CDP	1	1	1	1
CDP-choline	1	1	1	1
CDP-diacylglycerol-CL pool	1	1	1	1
CDP-diacylglycerol-LD-PI pool	1	1	1	1
CL pool	1	1	1	1
CMP	1	1	1	1
CO2	1	1	1	1
CTP	1	1	1	1
CoA	1	1	1	1
D-xylulose-5-phosphate	1	1	1	1
DHA	1	1	1	1
DHAP	1	1	1	1
DNA	1	1	1	1
DPA	1	1	1	1
EPA	1	1	1	1
FAD	1	1	1	1
FADH2	1	1	1	1
FAICAR	1	1	1	1
GAP	1	1	1	1
GAR	1	1	1	1
GDP	1	1	1	1
GMP	1	1	1	1
GTP	1	1	1	1
H+	1	1	1	1
H2O	1	1	1	1
H2O2	1	1	1	1
HCO3-	1	1	1	1
HMG-CoA	1	1	1	1
IMP	1	1	1	1
L-carnitine	1	1	1	1
L-oleoylcarnitine	1	1	1	1
N-carbamoyl-L-aspartate	1	1	1	1
N-formyl-GAR	1	1	1	1
NAD+	1	1	1	1
NADH	1	1	1	1
NADPH	1	1	1	1
NEFA blood pool in	1	1	1	1
NH3	1	1	1	1
Na+	1	1	1	1
O2	1	1	1	1
OAA	1	1	1	1
PC-LD pool	1	1	1	1
PE-LD pool	1	1	1	1
PG-CL pool	1	1	1	1
PGP-CL pool	1	1	1	1
PI pool	1	1	1	1
PPi	1	1	1	1
PRPP	1	1	1	1
PS-LD pool	1	1	1	1
Pi	1	1	1	1
RNA	1	1	1	1
S-glutathionyl-2-4-dinitrobenzene	0.951087	0.724638	1	1
S-glutathionyl-ethacrynic acid	1.3587	1.44928	1	1
SAICAR	1	1	1	1
SM pool	1	1	1	1
TAG-LD pool	1	1	1	1
THF	1	1	1	1
UDP	1	1	1	1
UDP-glucose	1	1	1	1
UMP	1	1	1	1
UTP	1	1	1	1
[ACP]	1	1	1	1
acetoacetyl-CoA	1	1	1	1
acetyl-CoA	1	1	1	1
acyl-CoA-CL pool	1	1	1	1
acyl-CoA-LD-PC pool	1	1	1	1
acyl-CoA-LD-PE pool	28.9402	28.9855	1	1
acyl-CoA-LD-PI pool	1	1	1	1
acyl-CoA-LD-TG2 pool	11.9565	11.5942	1	1
acyl-CoA-LD-TG3 pool	1	1	1	1
acylglycerone-phosphate	7.88043	7.24638	1	1
adenylosuccinate	1	1	1	1
adrenic acid	1	1	1	1
alanine	1	1	1	1
arachidonate	1	1	1	1
arachidonyl-CoA	1	1	1	1
arachidonyl-carnitine	1	1	1	1
arginine	1	1	1	1
asparagine	1	1	1	1
aspartate	1	1	1	1
behenic acid	1	1	1	1
bilirubin	0.271739	0	1	1
butyryl-CoA	1	1	1	1
carbamoyl-phosphate	1	1	1	1
ceramide pool	1	1	1	1
cerotic acid	1	1	1	1
cholesterol	1	1	1	1
cholesterol-ester pool	1	1	1	1
cholesterol-ester-10,13,16,19-docosa	1	1	1	1
cholesterol-ester-10,13,16-docosa	1	1	1	1
cholesterol-ester-10-hepta	1	1	1	1
cholesterol-ester-11,14,17-eico	1	1	1	1
cholesterol-ester-11,14-eicosa	1	1	1	1
cholesterol-ester-11-docose	1	1	1	1
cholesterol-ester-11-eico	1	1	1	1
cholesterol-ester-12,15,18,21-tetracosa	1	1	1	1
cholesterol-ester-13,16,19-doco	1	1	1	1
cholesterol-ester-13,16-docosa	1	1	1	1
cholesterol-ester-13-docose	1	1	1	1
cholesterol-ester-13-octade	1	1	1	1
cholesterol-ester-15-tetra	1	1	1	1
cholesterol-ester-4,7,10,13,16,19-doco	1	1	1	1
cholesterol-ester-4,7,10,13,16-docosa	1	1	1	1
cholesterol-ester-5,8,11,14,17-eico	1	1	1	1
cholesterol-ester-5,8,11-eico	1	1	1	1
cholesterol-ester-5-tetra	1	1	1	1
cholesterol-ester-6,9,12,15,18,21-tetra	1	1	1	1
cholesterol-ester-6,9,12,15,18-tetraco	1	1	1	1
cholesterol-ester-6,9,12,15-octa	1	1	1	1
cholesterol-ester-6,9-octa	1	1	1	1
cholesterol-ester-7,10,13,16,19-docosa	1	1	1	1
cholesterol-ester-7,10,13,16-docosa	1	1	1	1
cholesterol-ester-7-hexa	1	1	1	1
cholesterol-ester-7-octade	1	1	1	1
cholesterol-ester-7-tetrade	1	1	1	1
cholesterol-ester-8,11,14,17-eico	1	1	1	1
cholesterol-ester-8,11-eico	1	1	1	1
cholesterol-ester-9,12,15,18,21-tetra	1	1	1	1
cholesterol-ester-9,12,15,18-tetraco	1	1	1	1
cholesterol-ester-9-eicose	1	1	1	1
cholesterol-ester-9-heptade	1	1	1	1
cholesterol-ester-9-octa	1	1	1	1
cholesterol-ester-9-tetrade	1	1	1	1
cholesterol-ester-arach	1	1	1	1
cholesterol-ester-cis-vac	1	1	1	1
cholesterol-ester-dihomo-gamma	1	1	1	1
cholesterol-ester-docosa	1	1	1	1
cholesterol-ester-eico	1	1	1	1
cholesterol-ester-gamma-lin	1	1	1	1
cholesterol-ester-heneico	1	1	1	1
cholesterol-ester-hepta	1	1	1	1
cholesterol-ester-hexacosa	1	1	1	1
cholesterol-ester-hexecose	1	1	1	1
cholesterol-ester-laur	1	1	1	1
cholesterol-ester-lin	1	1	1	1
cholesterol-ester-linolen	1	1	1	1
cholesterol-ester-myrist	1	1	1	1
cholesterol-ester-nanode	1	1	1	1
cholesterol-ester-ol	1	1	1	1
cholesterol-ester-palm	1	1	1	1
cholesterol-ester-palmn	1	1	1	1
cholesterol-ester-penta	1	1	1	1
cholesterol-ester-stea	1	1	1	1
cholesterol-ester-tetraco	1	1	1	1
cholesterol-ester-trico	1	1	1	1
cholesterol-ester-tridec	1	1	1	1
choline	1	1	1	1
cis-(3S)-hydroxytetradec-5-enoyl-CoA	1	1	1	1
cis-(3S)-hydroxytetradec-7-enoyl-CoA	1	1	1	1
cis-cetoleic acid	1	1	1	1
cis-erucic acid	1	1	1	1
cis-gondoic acid	1	1	1	1
cis-vaccenic acid	1	1	1	1
cis-vaccenoyl-CoA	1	1	1	1
citrate	1	1	1	1
crotonyl-CoA	1	1	1	1
cysteine	1	1	1	1
dATP	1	1	1	1
dCMP	2.03804	2.17391	1	1
dCTP	1	1	1	1
dGDP	10.3261	10.1449	1	1
dGMP	5.97826	5.7971	1	1
dGTP	1	1	1	1
dTDP	1	1	1	1
dTMP	1	1	1	1
dTTP	1	1	1	1
dUMP	1	1	1	1
dUTP	1.90217	1.44928	1	1
decanoyl-CoA	1	1	1	1
dehydroalanine	1.3587	0.724638	1	1
deoxyguanosine	5.97826	5.7971	1	1
dihomo-gamma-linolenate	1	1	1	1
dihomo-gamma-linolenoyl-CoA	1	1	1	1
dihydroceramide pool	1	1	1	1
dihydrofolate	1	1	1	1
dimethylallyl-PP	1	1	1	1
docosahexaenoylcarnitine	1	1	1	1
docosanoyl-CoA	1	1	1	1
docosanoylcarnitine	97.0109	97.1014	1	1
docosenoylcarnitine	96.4674	97.1014	1	1
docosenoylcarnitine(11)	97.2826	97.8261	1	1
dodecanoylcarnitine	1	1	1	1
eicosa-(2E,8Z,11Z,14Z,17Z)-pentaenoyl-CoA	1	1	1	1
eicosanoate	1	1	1	1
eicosanoyl-CoA	1	1	1	1
eicosanoylcarnitine	96.7391	97.1014	1	1
eicosatrienoylcarnitine	1	1	1	1
eicosenoylcarnitine(11)	96.6033	97.1014	1	1
eicosenoylcarnitine(7)	96.7391	97.1014	1	1
eicosenoylcarnitine(9)	96.4674	97.1014	1	1
elaidate	1	1	1	1
ethanolamine	1	1	1	1
ethanolamine-phosphate	99.8641	100	1	1
farnesyl-PP	1	1	1	1
fatty acid-LD-PC pool	1	1	1	1
fatty acid-LD-PE pool	1	1	1	1
ferricytochrome C	1	1	1	1
ferrocytochrome C	1	1	1	1
formate	1	1	1	1
fructose-6-phosphate	1	1	1	1
fumarate	1	1	1	1
gamma-linolenate	1	1	1	1
gamma-linolenoyl-CoA	1	1	1	1
geranyl-PP	1	1	1	1
glucose	1	1	1	1
glucose-1-phosphate	1	1	1	1
glucose-6-phosphate	1	1	1	1
glutamate	1	1	1	1
glutamine	1	1	1	1
glyceraldehyde	1	1	1	1
glycerol	1	1	1	1
glycine	1	1	1	1
glycogen	1	1	1	1
glycolithocholate	0.13587	0	1	1
guanine	5.97826	5.7971	1	1
heneicosanoyl-CoA	1	1	1	1
heneicosanoylcarnitine	96.6033	97.1014	1	1
henicosanoic acid	1	1	1	1
heptadecanoyl-CoA	1	1	1	1
heptadecanoylcarnitine	96.4674	97.1014	1	1
heptadecenoylcarnitine(7)	1	1	1	1
heptadecenoylcarnitine(8)	97.2826	97.8261	1	1
hexacosanoyl-CoA	1	1	1	1
hexacosanoylcarnitine	96.4674	97.1014	1	1
hexacosenoyl-CoA	1	1	1	1
hexacosenoylcarnitine	96.4674	97.1014	1	1
hexadecenoylcarnitine(9)	1	1	1	1
hexanoyl-CoA	1	1	1	1
histidine	1	1	1	1
inositol	1	1	1	1
isocitrate	1	1	1	1
isoleucine	1	1	1	1
isopentenyl-pPP	1	1	1	1
lanosterol	1	1	1	1
lauric acid	1	1	1	1
lauroyl-CoA	1	1	1	1
leucine	1	1	1	1
lignocerate	1	1	1	1
linoleate	1	1	1	1
linoleic-carnitine	1	1	1	1
linolenate	1	1	1	1
linolenoyl-CoA	1	1	1	1
linoleoyl-CoA	1	1	1	1
lysine	1	1	1	1
malate	1	1	1	1
malonyl-CoA	1	1	1	1
malonyl-[ACP]	1	1	1	1
margaric acid	1	1	1	1
mead acid	1	1	1	1
methionine	1	1	1	1
myristic acid	1	1	1	1
myristoyl-CoA	1	1	1	1
nervonic acid	1	1	1	1
nonadecanoyl-CoA	1	1	1	1
nonadecanoylcarnitine	96.4674	97.1014	1	1
nonadecylic acid	1	1	1	1
octadecatrienoylcarnitine	1	1	1	1
octadecenoylcarnitine(11)	96.7391	97.1014	1	1
octadecenoylcarnitine(5)	97.2826	97.8261	1	1
octanoyl-CoA	1	1	1	1
oleate	1	1	1	1
oleoyl-CoA	1	1	1	1
orotate	1	1	1	1
orotidine-5-phosphate	1	1	1	1
oxidized thioredoxin	1	1	1	1
palmitate	1	1	1	1
palmitolate	1	1	1	1
palmitoleoyl-CoA	1	1	1	1
palmitoleoyl-carnitine	1	1	1	1
palmitoyl-CoA	1	1	1	1
pentadecanoyl-CoA	1	1	1	1
pentadecanoylcarnitine	1	1	1	1
pentadecylic acid	1	1	1	1
phenylalanine	1	1	1	1
phosphatidate-CL pool	1	1	1	1
phosphatidate-LD-PC pool	1	1	1	1
phosphatidate-LD-PI pool	1	1	1	1
phosphatidate-LD-TAG pool	1	1	1	1
phosphocholine	1	1	1	1
physeteric acid	1	1	1	1
presqualene-PP	1	1	1	1
proline	1	1	1	1
propanoyl-CoA	1	1	1	1
pyruvate	1	1	1	1
ribose-5-phosphate	1	1	1	1
serine	1	1	1	1
sn-glycerol-3-phosphate	1	1	1	1
sphinganine	1	1	1	1
squalene	1	1	1	1
squalene 2,3-oxide	1	1	1	1
stearate	1	1	1	1
stearidonic acid	1	1	1	1
stearoyl-CoA	1	1	1	1
succinate	1	1	1	1
succinyl-CoA	1	1	1	1
sulfochenodeoxycholate	0.13587	0	1	1
taurolithocholate	0.271739	0	1	1
tetracosanoyl-CoA	1	1	1	1
tetracosanoylcarnitine	96.4674	97.1014	1	1
tetradecanoylcarnitine	1	1	1	1
tetradecenoylcarnitine(5)	97.4185	97.8261	1	1
thioredoxin	1	1	1	1
threonine	1	1	1	1
trans,cis,cis,cis-2,11,14,17-eicosatetraenoyl-CoA	2.71739	2.17391	1	1
trans,cis-2,11-eicosadienoyl-CoA	1	1	1	1
trans,cis-2,13-docosadienoyl-CoA	1	1	1	1
trans,cis-2,15-tetracosadienoyl-CoA	1	1	1	1
trans,cis-2,17-hexacosadienoyl-CoA	1	1	1	1
trans,cis-hexadeca-2,7-dienoyl-CoA	1	1	1	1
trans,cis-hexadeca-2,9-dienoyl-CoA	1	1	1	1
trans,cis-myristo-2,5-dienoyl-CoA	1	1	1	1
trans,cis-myristo-2,7-dienoyl-CoA	1	1	1	1
trans,cis-octadeca-2,9-dienoyl-CoA	1	1	1	1
tricosanoic acid	1	1	1	1
tricosanoyl-CoA	1	1	1	1
tridecanoyl-CoA	1	1	1	1
tridecanoylcarnitine	98.6413	98.5507	1	1
tridecylic acid	1	1	1	1
tryptophan	1	1	1	1
tyrosine	1	1	1	1
ubiquinol	1	1	1	1
ubiquinone	1	1	1	1
ursodeoxycholate	0	0	1	1
valine	1	1	1	1
xanthosine-5-phosphate	1	1	1	1
ximenic acid	1	1	1	1
